# Supplementary material for: NHC-catalyzed enantioselective C2-functionalization of 3-hydroxychromenones via α,β-unsaturated acyl azoliums
Source: Royal Society of Chemistry journal article supplement (doi:10.1039/d1cc03708k), 2021-01-01
Supplement: d1cc03708k1.pdf [file d1cc03708k1.pdf]

Supporting Information

## **NHC-Catalyzed Enantioselective C2-Functionalization of 3-Hydroxychromenones via $\alpha,\beta$ -Unsaturated Acylazoliums**

Krzysztof Dzieszkowski, Michał Słotwiński, Katarzyna Rafińska, Tadeusz Muzioł, Zbigniew Rafiński\*

Faculty of Chemistry, Nicolaus Copernicus University in Toruń  
Toruń, Poland

e-mail: [payudo@umk.pl](mailto:payudo@umk.pl)

## Table of Content

|                                     |     |
|-------------------------------------|-----|
| 1. General Methods.....             | 3   |
| 2. Synthetic Procedures.....        | 4   |
| 3. X-Ray Crystallography Data ..... | 19  |
| 4. NMR Spectra.....                 | 21  |
| 5. HPLC Chromatograms.....          | 88  |
| 6. Literature.....                  | 122 |

## 1. General Methods

**General information.** Presented reactions were carried out in dry glassware under an inert atmosphere of argon. Selected reactions were monitored using thin-layer chromatography (TLC), which was visualized under a UV lamp (254 nm). Anhydrous solvents were prepared using INERT PureSolv Solvent Purification System. Purification of selected products was performed by column chromatography using CombiFlash Rf+ Lumen system with UV-VIS and ELSD detectors. RediSepRf GOLD 4 gram columns were used. NMR spectra were recorded on Bruker AMX 400 [400 MHz ( $^1\text{H}$ )] spectrometer, Bruker AMX 700 [700 MHz ( $^1\text{H}$ )] spectrometer, and Bruker 300 MHz spectrometer using  $\text{CDCl}_3$  as solvent. Chemical shifts are reported in ppm using the residual solvent peak as reference:  $\delta$  7.24 for  $^1\text{H}$  NMR and relative to the central  $\text{CDCl}_3$  ( $\delta$  77.23) resonance for  $^{13}\text{C}$  NMR. Coupling constants ( $J$ ) were provided in Hz. Infrared spectra were measured on Alpha FT-IR spectrometer from Bruker with an ATR module. Mass spectra were recorded on Agilent 6530 Q-TOF LC/MS system coupled with 1290 Infinity II liquid chromatograph. Melting points of obtained products were measured on Stuart SMP50 Melting Point Apparatus and were not corrected. HPLC chromatograms were recorded using Agilent Technologies 1200 Series HPLC with Phenomenex Amylose-1 3  $\mu\text{m}$  column. The diffraction data of the studied compound were collected at room temperature for the single crystal using Oxford Sapphire CCD diffractometer,  $\text{MoK}\alpha$  radiation  $\lambda = 0.71073 \text{ \AA}$ .

## 2. Synthetic Procedures

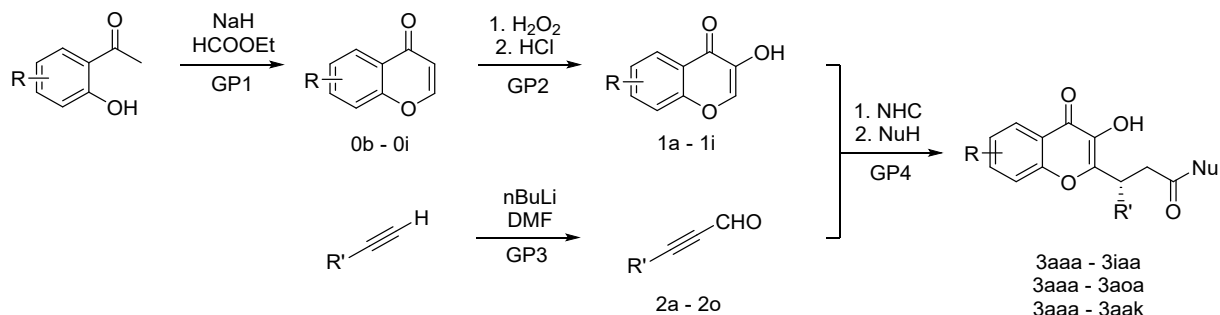

**General Procedure 1 (GP1).** Sodium hydride (60% dispersion in oil; 4 eq) was washed three times with pentane and dispersed in dry THF. 2-Hydroxyacetophenone derivative (1 eq) was added slowly at room temperature to obtain a 0.5 mol/L solution. Then ethyl formate (3 eq) was added dropwise to the vigorously stirring solution. After the highly exothermic reaction the mixture was stirred for an additional 5 minutes and poured onto the water with ice. The obtained solution was acidified with concentrated hydrochloric acid and extracted with dichloromethane. Combined organic fractions were vigorously stirred with a hydrochloric acid solution (6 mol/L) for an additional hour. The organic fraction was separated, dried over anhydrous magnesium sulfate, and evaporated to obtain pure product.

**General Procedure 2 (GP2).** A 50% hydrogen peroxide solution (2 eq) was added slowly to the 0.75 mol/L DCM solution of chromone derivative (1 eq) at the temperature of 0 °C. Then solid sodium hydroxide (1.5 eq) was added portion-wise, and the mixture was stirred at 0 °C for 3 hours. The reaction was quenched with water, and the product was extracted with dichloromethane. Collected organic fractions were dried over anhydrous magnesium sulfate and evaporated. The obtained crude diol was added to the large excess of concentrated hydrochloric acid and stirred at 70 °C for an hour. The reaction mixture was cooled down to ambient temperature, diluted with water, and extracted with dichloromethane. Collected organic fractions were dried over anhydrous magnesium sulfate and evaporated. Pentane was added to the crude product, and remained solid was filtered off to obtain pure product.

**General Procedure 3 (GP3).** An acetylene derivative (1 eq) was dissolved in dry THF to obtain a 0.4 mol/L solution. Then the solution of n-butyllithium (2.5 mol/L in hexanes; 1 eq) was added dropwise at the temperature of -40 °C. Dimethylformamide (2 eq) was added quickly, the obtained mixture was warm up to ambient temperature and stirred for additional 30 minutes. The obtained solution was added to the vigorously stirred mixture containing 1 mol/L aqueous solution of KH<sub>2</sub>PO<sub>4</sub> (2 eq) and the same volume of methyl-*tert*-butyl ether (MTBE) at 0 °C. The organic fraction was separated, and the aqueous layer was extracted with MTBE. Combined organic fractions were washed with water, dried over anhydrous magnesium sulfate, and evaporated. The obtained crude product was purified using flash column chromatography.

**General procedure 4 (GP4).** Precatalyst (0.025 mmol) and 1,8-bis(dimethylamino)naphthalene (0.025 mmol) were dissolved in dry dichloromethane (2.5 mL) and stirred at ambient temperature for 15 minutes. Then ynal (0.38 mmol) and 3-hydroxy-4*H*-chromen-4-one derivative (0.25 mmol) were added. The reaction mixture was stirred for 5 hours and the nucleophilic agent (alcohol or amine; 2.5 mL) was added. The obtained solution was stirred for an additional time defined as an opening time. Then the solution was evaporated and purified by flash column chromatography.

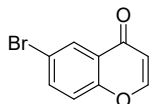

6-Bromo-4*H*-chromen-4-one (**Ob**). GP1. A scale of 25.0 mmol, solid, 5.123 g (22.8 mmol), isolated yield of 91%; <sup>1</sup>H NMR (700 MHz, CDCl<sub>3</sub>) δ 8.33 (dd, *J* = 0.4, 2.6 Hz, 1H), 7.85 (d, *J* = 6.0 Hz, 1H), 7.75 (dd, *J* = 2.5, 8.9 Hz, 1H), 7.36 (dd, *J* = 0.4, 8.8 Hz, 1H), 6.35 (d, *J* = 6.0 Hz, 1H); <sup>13</sup>C{<sup>1</sup>H} NMR (75 MHz, CDCl<sub>3</sub>) δ 176.2, 155.5, 155.2, 136.7, 128.4, 126.1, 120.2, 118.7, 113.0; IR *v*<sub>max</sub>: 3070, 1635, 1605, 1558, 1461, 1437, 1187, 1136, 817 cm<sup>-1</sup>; HRMS (ESI-TOF) *m/z*: (M + H)<sup>+</sup> calcd for C<sub>9</sub>H<sub>6</sub><sup>79</sup>BrO<sub>2</sub> 224.9551; found: 224.9554; mp 134.8–138.2 °C. The above analysis results correspond to the literature data.<sup>1</sup>

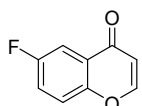

6-Fluoro-4*H*-chromen-4-one (**Oc**). GP1. A scale of 25.0 mmol, solid, 3.796 g (23.1 mmol), isolated yield of 92%; <sup>1</sup>H NMR (700 MHz, CDCl<sub>3</sub>) δ 7.89 (d, *J* = 5.9 Hz, 1H), 7.87 (ddd, *J* = 0.4, 3.1, 8.1 Hz, 1H), 7.50 (ddd, *J* = 0.4, 4.2, 9.2 Hz, 1H), 7.42 (ddd, *J* = 3.2, 7.5, 9.1 Hz, 1H), 6.36 (dd, *J* = 0.4, 5.9 Hz, 1H); <sup>13</sup>C{<sup>1</sup>H} NMR (75 MHz, CDCl<sub>3</sub>) δ 176.8 (d, *J* = 2.1 Hz), 159.5 (d, *J* = 247.1 Hz), 155.5, 152.7 (d, *J* = 2.1 Hz), 126.0 (d, *J* = 6.9 Hz), 122.0 (d, *J* = 25.6 Hz), 120.3 (d, *J* = 8.3 Hz), 112.2, 110.6 (d, *J* = 23.5 Hz); IR *v*<sub>max</sub>: 3083, 1642, 1615, 1573, 1478, 1456, 1133, 1064, 1025, 826 cm<sup>-1</sup>; HRMS (ESI-TOF) *m/z*: (M + H)<sup>+</sup> calcd for C<sub>9</sub>H<sub>6</sub>FO<sub>2</sub> 165.0352; found: 165.0353; mp 157.8–163.2 °C. The above analysis results correspond to the literature data.<sup>1</sup>

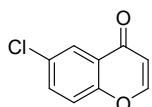

6-Chloro-4*H*-chromen-4-one (**Od**). GP1. A scale of 25.0 mmol, solid, 4.180 g (23.1 mmol), isolated yield of 93%; <sup>1</sup>H NMR (700 MHz, CDCl<sub>3</sub>) δ 8.18–8.17 (m, 1H), 7.85 (d, *J* = 6.0 Hz, 1H), 7.61 (dd, *J* = 2.7, 8.9 Hz, 1H), 7.42 (dd, *J* = 0.4, 8.8 Hz, 1H), 6.35 (d, *J* = 6.0 Hz, 1H); <sup>13</sup>C{<sup>1</sup>H} NMR (75 MHz, CDCl<sub>3</sub>) δ 176.3, 155.5, 154.8, 134.0, 131.2, 125.7, 125.2, 119.9, 112.9; IR *v*<sub>max</sub>: 3068, 1634, 1610, 1562, 1464, 1439, 1137, 841, 817 cm<sup>-1</sup>; HRMS (ESI-TOF) *m/z*: (M + H)<sup>+</sup> calcd for C<sub>9</sub>H<sub>6</sub><sup>35</sup>ClO<sub>2</sub> 181.0056; found: 181.0054; mp 135.2–139.8 °C. The above analysis results correspond to the literature data.<sup>2</sup>

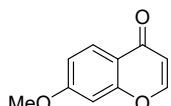

7-Methoxy-4*H*-chromen-4-one (**Oe**). GP1. A scale of 25.0 mmol, solid, 0.967 g (5.5 mmol), isolated yield of 22%; <sup>1</sup>H NMR (700 MHz, CDCl<sub>3</sub>) δ 8.12–8.10 (m, 1H), 7.77 (d, *J* = 6.0 Hz, 1H), 6.97 (dd, *J* = 2.5, 8.9 Hz, 1H), 6.83 (d, *J* = 2.4 Hz, 1H), 6.27 (d, *J* = 6.0 Hz, 1H), 3.90 (s, 3H); <sup>13</sup>C{<sup>1</sup>H} NMR (75 MHz, CDCl<sub>3</sub>) δ 177.0, 164.1, 158.2, 154.8, 127.2, 118.7, 114.5, 112.9, 100.3, 55.8; IR *v*<sub>max</sub>: 3064, 3021, 1619, 1589, 1498, 1435, 1268, 1223, 823 cm<sup>-1</sup>; HRMS (ESI-TOF) *m/z*: (M + H)<sup>+</sup> calcd for C<sub>10</sub>H<sub>9</sub>O<sub>3</sub> 177.0552; found: 177.0552; mp 106.1–107.9 °C. The above analysis results correspond to the literature data.<sup>3</sup>

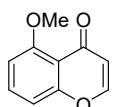

5-Methoxy-4*H*-chromen-4-one (**Of**). GP1. A scale of 25.0 mmol, solid, 3.347 g (19.0 mmol), isolated yield of 76%; <sup>1</sup>H NMR (700 MHz, CDCl<sub>3</sub>) δ 7.67 (dd, *J* = 0.5, 5.9 Hz, 1H), 7.53 (dt, *J* = 1.0, 8.3 Hz, 1H), 7.02–6.97 (m, 1H), 6.80 (d, *J* = 8.4 Hz, 1H), 6.23 (dd, *J* = 1.1, 6.0 Hz, 1H), 3.96 (d, *J* = 1.1 Hz, 3 H); <sup>13</sup>C{<sup>1</sup>H} NMR (75 MHz, CDCl<sub>3</sub>) δ 177.4, 159.8, 158.5, 153.1, 133.7, 115.6, 114.6, 110.2, 106.4, 56.4; IR *v*<sub>max</sub>: 3083, 1638, 1600, 1569, 1471, 1451, 1263, 1084, 1065, 835 cm<sup>-1</sup>; HRMS (ESI-TOF) *m/z*: (M + H)<sup>+</sup> calcd for C<sub>10</sub>H<sub>9</sub>O<sub>3</sub> 177.0552; found: 177.0551; mp 78.2–81.1 °C. The above analysis results correspond to the literature data.<sup>4</sup>

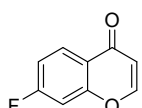

7-Fluoro-4*H*-chromen-4-one (**Og**). GP1. A scale of 25.0 mmol, solid, 3.833 g (23.4 mmol), isolated yield of 93%; <sup>1</sup>H NMR (700 MHz, CDCl<sub>3</sub>) δ 8.22 (dd, *J* = 6.1, 9.6 Hz, 1H), 7.83 (d, *J* = 6.0 Hz, 1H), 7.15–7.12 (m, 2H), 6.33 (d, *J* = 6.0 Hz, 1H); <sup>13</sup>C{<sup>1</sup>H} NMR (75 MHz, CDCl<sub>3</sub>) δ 176.6, 165.6 (d, *J* = 255.3 Hz), 157.4 (d, *J* = 13.1 Hz), 155.4, 128.4 (d, *J* = 10.4 Hz), 121.7 (d, *J* = 2.8 Hz), 114.1 (d, *J* = 22.8 Hz), 113.1, 104.8 (d, *J* = 24.9 Hz); IR *v*<sub>max</sub>: 3092, 1648, 1613, 1496, 1437, 1212, 1126, 1021, 844, 814 cm<sup>-1</sup>; HRMS (ESI-TOF) *m/z*: (M + H)<sup>+</sup> calcd for C<sub>9</sub>H<sub>6</sub>FO<sub>2</sub> 165.0352; found: 165.0349; mp 110.1–112.1 °C. The above analysis results correspond to the literature data.<sup>5</sup>

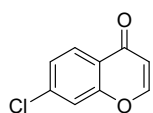

7-Chloro-4H-chromen-4-one (**Oh**). GP1. A scale of 12.5 mmol, solid, 2.038 g (11.3 mmol), isolated yield of 90%;  $^1\text{H}$  NMR (700 MHz,  $\text{CDCl}_3$ )  $\delta$  8.15-8.13 (m, 1H), 7.82 (d,  $J = 6.0$  Hz, 1H), 7.48 (d,  $J = 1.9$  Hz, 1H), 7.37 (dd,  $J = 1.9, 8.6$  Hz, 1H), 6.33 (d,  $J = 6.0$  Hz, 1H);  $^{13}\text{C}\{^1\text{H}\}$  NMR (75 MHz,  $\text{CDCl}_3$ )  $\delta$  176.7, 156.5, 155.3, 139.8, 127.2, 126.1, 123.4, 118.2, 113.3; IR  $\nu_{\text{max}}$ : 3080, 1645, 1598, 1557, 1424, 1177, 1019, 809  $\text{cm}^{-1}$ ; HRMS (ESI-TOF)  $m/z$ : ( $\text{M} + \text{H}$ ) $^+$  calcd for  $\text{C}_9\text{H}_6^{35}\text{ClO}_2$  181.0056; found: 181.0055; mp 93.1–97.4  $^\circ\text{C}$ . The above analysis results correspond to the literature data.<sup>6</sup>

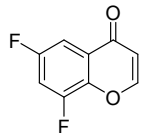

6,8-Difluoro-4H-chromen-4-one (**Oi**). GP1. A scale of 12.5 mmol, solid, 2.275 g (12.5 mmol), isolated yield of 99%;  $^1\text{H}$  NMR (700 MHz,  $\text{CDCl}_3$ )  $\delta$  7.89 (d,  $J = 6.0$  Hz, 1H), 7.64 (ddd,  $J = 1.8, 3.0, 8.1$  Hz, 1H), 7.24 (ddd,  $J = 3.0, 8.0, 10.1$  Hz, 1H), 6.37 (d,  $J = 6.0$  Hz, 1H);  $^{13}\text{C}\{^1\text{H}\}$  NMR (75 MHz,  $\text{CDCl}_3$ )  $\delta$  175.5 (dd,  $J = 2.8, 2.1$  Hz), 158.3 (dd,  $J = 249.8, 9.7$  Hz), 155.0, 151.5 (dd,  $J = 258.1, 11.1$  Hz), 142.1 (dd,  $J = 11.1, 2.8$  Hz), 127.0 (d,  $J = 8.3$  Hz), 112.7, 109.2 (dd,  $J = 28.4, 20.1$  Hz), 106.0 (dd,  $J = 23.5, 4.2$  Hz); IR  $\nu_{\text{max}}$ : 3093, 3034, 1646, 1633, 1613, 1575, 1479, 1452, 1112, 1004  $\text{cm}^{-1}$ ; HRMS (ESI-TOF)  $m/z$ : ( $\text{M} + \text{H}$ ) $^+$  calcd for  $\text{C}_9\text{H}_5\text{F}_2\text{O}_2$  183.0258; found: 183.0262; mp 149.8–153.6  $^\circ\text{C}$ .

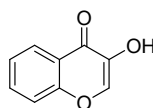

3-Hydroxy-4H-chromen-4-one (**1a**). GP2. A scale of 15.0 mmol, solid, 0.780 g (4.8 mmol), isolated yield of 32%;  $^1\text{H}$  NMR (700 MHz,  $\text{CDCl}_3$ )  $\delta$  8.29 (ddd,  $J = 0.4, 1.8, 8.1$  Hz, 1H), 8.04 (s, 1H), 7.75-7.68 (m, 1H), 7.52 (d,  $J = 8.6$  Hz, 1H), 7.43 (t,  $J = 7.6$  Hz, 1H), 6.29 (s, 1H);  $^{13}\text{C}\{^1\text{H}\}$  NMR (75 MHz,  $\text{CDCl}_3$ )  $\delta$  173.4, 156.3, 141.8, 138.5, 133.5, 125.5, 124.6, 121.9, 118.5; IR  $\nu_{\text{max}}$ : 3269, 3096, 1636, 1599, 1562, 1489, 1466, 1421, 1272, 756  $\text{cm}^{-1}$ ; HRMS (ESI-TOF)  $m/z$ : ( $\text{M} + \text{H}$ ) $^+$  calcd for  $\text{C}_9\text{H}_7\text{O}_3$  163.0395; found: 163.0398; mp 175.1–179.5  $^\circ\text{C}$ . The above analysis results correspond to the literature data.<sup>7</sup>

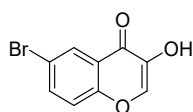

6-Bromo-3-hydroxy-4H-chromen-4-one (**1b**). GP2. A scale of 21.4 mmol, solid, 0.405 g (1.7 mmol), isolated yield of 8%;  $^1\text{H}$  NMR (400 MHz,  $\text{CDCl}_3$ )  $\delta$  8.41 (d,  $J = 2.4$  Hz, 1H), 8.02 (s, 1H), 7.78 (dd,  $J = 2.4, 8.8$  Hz, 1H), 7.42 (d,  $J = 9.0$  Hz, 1H), 6.07 (s, 1H);  $^{13}\text{C}\{^1\text{H}\}$  NMR (75 MHz,  $\text{CDCl}_3$ )  $\delta$  172.1, 155.0, 141.9, 138.6, 136.6, 128.0, 123.1, 120.4, 118.0; IR  $\nu_{\text{max}}$ : 3101, 1620, 1599, 1556, 1469, 1405, 1269, 814  $\text{cm}^{-1}$ ; HRMS (ESI-TOF)  $m/z$ : ( $\text{M} + \text{H}$ ) $^+$  calcd for  $\text{C}_9\text{H}_6^{79}\text{BrO}_3$  240.9500; found: 240.9504; mp 199.9–204.3  $^\circ\text{C}$ .

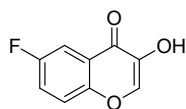

6-Fluoro-3-hydroxy-4H-chromen-4-one (**1c**). GP2. A scale of 21.3 mmol, solid, 1.223 g (6.8 mmol), isolated yield of 32%;  $^1\text{H}$  NMR (700 MHz,  $\text{CDCl}_3$ )  $\delta$  8.05 (s, 1H), 7.90 (ddd,  $J = 0.4, 3.1, 8.1$  Hz, 1H), 7.56-7.51 (m,  $J = 0.4, 4.2$  Hz, 1H), 7.44 (ddd,  $J = 3.1, 7.5, 9.2$  Hz, 1H), 6.10 (s, 1H);  $^{13}\text{C}\{^1\text{H}\}$  NMR (176 MHz,  $\text{CDCl}_3$ )  $\delta$  172.7, 159.1 (d,  $J = 246.9$  Hz), 152.7, 141.4, 138.6, 122.9 (d,  $J = 8.2$  Hz), 122.2 (d,  $J = 26.2$  Hz), 120.7 (d,  $J = 8.2$  Hz), 110.0 (d,  $J = 22.9$  Hz); IR  $\nu_{\text{max}}$ : 3331, 1638, 1609, 1575, 1479, 1467, 1405, 1261, 790, 784  $\text{cm}^{-1}$ ; HRMS (ESI-TOF)  $m/z$ : ( $\text{M} + \text{H}$ ) $^+$  calcd for  $\text{C}_9\text{H}_6\text{FO}_3$  181.0301; found: 181.0303; mp 219.5–225.2  $^\circ\text{C}$ .

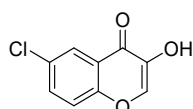

6-Chloro-3-hydroxy-4H-chromen-4-one (**1d**). GP2. A scale of 21.0 mmol, solid, 0.606 g (3.2 mmol), isolated yield of 15%;  $^1\text{H}$  NMR (700 MHz,  $\text{CDCl}_3$ )  $\delta$  8.22 (dd,  $J = 0.4, 2.6$  Hz, 1H), 8.00 (s, 1H), 7.62 (dd,  $J = 2.6, 9.0$  Hz, 1H), 7.46 (d,  $J = 9.0$  Hz, 1H), 6.04 (s, 1H);  $^{13}\text{C}\{^1\text{H}\}$  NMR (75 MHz,  $\text{CDCl}_3$ )  $\delta$  172.3, 154.6, 141.8, 138.6, 133.9, 130.7, 124.8, 122.7, 120.2; IR  $\nu_{\text{max}}$ : 3290, 3085, 1629, 1605, 1564, 1470, 1455, 1395, 1248, 824, 769  $\text{cm}^{-1}$ ; HRMS (ESI-TOF)  $m/z$ : ( $\text{M} + \text{H}$ ) $^+$  calcd for  $\text{C}_9\text{H}_6^{35}\text{ClO}_3$  197.0005; found: 197.0002; mp 162.3–168.4  $^\circ\text{C}$ . The above analysis results correspond to the literature data.<sup>7</sup>

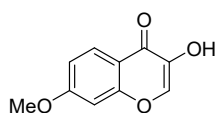

3-Hydroxy-7-methoxy-4H-chromen-4-one (**1e**). GP2. A scale of 4.9 mmol, solid, 0.286 g (1.5 mmol), isolated yield of 30%;  $^1\text{H}$  NMR (700 MHz,  $\text{CDCl}_3$ )  $\delta$  8.14 (d,  $J = 8.8$  Hz, 1H), 7.91 (s, 1H), 6.98 (dd,  $J = 2.4, 9.0$  Hz, 1H), 6.84 (d,  $J = 2.4$  Hz, 1H), 6.25 (s, 1H), 3.90 (s, 3H);  $^{13}\text{C}\{^1\text{H}\}$  NMR (75 MHz,  $\text{CDCl}_3$ )  $\delta$  172.8, 164.1, 158.2, 141.5, 137.8, 126.8, 115.8, 114.9, 100.0, 55.8; IR  $\nu_{\text{max}}$ : 3284, 3086, 1600, 1566, 1508, 1454, 1433, 1411, 1248, 818, 779  $\text{cm}^{-1}$ ; HRMS (ESI-TOF)  $m/z$ : (M + H) $^+$  calcd for  $\text{C}_{10}\text{H}_9\text{O}_4$  193.0501; found: 193.0502; mp 171.1–174.5  $^\circ\text{C}$ . The above analysis results correspond to the literature data.<sup>8</sup>

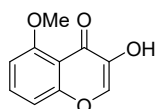

3-Hydroxy-5-methoxy-4H-chromen-4-one (**1f**). GP2. A scale of 16.5 mmol, solid, 1.321 g (6.9 mmol), isolated yield of 42%;  $^1\text{H}$  NMR (700 MHz,  $\text{CDCl}_3$ )  $\delta$  7.87 (s, 1H), 7.55 (t,  $J = 8.4$  Hz, 1H), 7.04 (dd,  $J = 1.0, 8.5$  Hz, 1H), 6.78 (dd,  $J = 0.4, 8.2$  Hz, 1H), 6.41 (s, 1H), 4.01 (s, 3H);  $^{13}\text{C}\{^1\text{H}\}$  NMR (75 MHz,  $\text{CDCl}_3$ )  $\delta$  172.8, 159.8, 158.3, 142.0, 135.7, 133.8, 112.6, 110.5, 105.0, 56.4; IR  $\nu_{\text{max}}$ : 3279, 3089, 1624, 1604, 1571, 1475, 1443, 1417, 1267, 803, 700  $\text{cm}^{-1}$ ; HRMS (ESI-TOF)  $m/z$ : (M + H) $^+$  calcd for  $\text{C}_{10}\text{H}_9\text{O}_4$  193.0501; found: 193.0503; mp 148.2–153.0  $^\circ\text{C}$ .

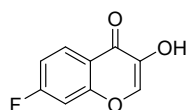

7-Fluoro-3-hydroxy-4H-chromen-4-one (**1g**). GP2. A scale of 23.2 mmol, solid, 1.547 g (8.6 mmol), isolated yield of 37%;  $^1\text{H}$  NMR (700 MHz,  $\text{CDCl}_3$ )  $\delta$  8.27 (ddd,  $J = 0.4, 6.2, 8.8$  Hz, 1H), 7.98 (s, 1H), 7.19–7.13 (m, 2H), 6.13 (s, 1H);  $^{13}\text{C}\{^1\text{H}\}$  NMR (75 MHz,  $\text{CDCl}_3$ )  $\delta$  172.6, 165.6 (d,  $J=255.3$  Hz), 157.3 (d,  $J=13.8$  Hz), 141.7, 138.4 (d,  $J=1.4$  Hz), 128.1 (d,  $J=11.1$  Hz), 118.7 (d,  $J=2.1$  Hz), 114.0 (d,  $J=23.5$  Hz), 104.9 (d,  $J=25.6$  Hz); IR  $\nu_{\text{max}}$ : 3286, 3098, 1635, 1602, 1493, 1454, 1406, 1268, 852, 812, 774  $\text{cm}^{-1}$ ; HRMS (ESI-TOF)  $m/z$ : (M + H) $^+$  calcd for  $\text{C}_9\text{H}_6\text{FO}_3$  181.0301; found: 181.0302; mp 213.3–219.9  $^\circ\text{C}$ .

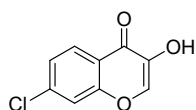

7-Chloro-3-hydroxy-4H-chromen-4-one (**1h**). GP2. A scale of 11.1 mmol, solid, 0.306 g (1.6 mmol), isolated yield of 14%;  $^1\text{H}$  NMR (700 MHz,  $\text{CDCl}_3$ )  $\delta$  8.18 (dd,  $J = 0.4, 8.6$  Hz, 1H), 7.97 (s, 1H), 7.52 (d,  $J = 1.9$  Hz, 1H), 7.37 (dd,  $J = 1.9, 8.6$  Hz, 1H), 6.21 (s, 1H);  $^{13}\text{C}\{^1\text{H}\}$  NMR (75 MHz,  $\text{CDCl}_3$ )  $\delta$  172.7, 156.3, 141.9, 139.9, 138.4, 126.9, 125.7, 120.4, 118.4; IR  $\nu_{\text{max}}$ : 3307, 3110, 1624, 1608, 1561, 1481, 1449, 1400, 1270, 891, 863, 778  $\text{cm}^{-1}$ ; HRMS (ESI-TOF)  $m/z$ : (M + H) $^+$  calcd for  $\text{C}_9\text{H}_6^{35}\text{ClO}_3$  197.0005; found: 197.0006; mp 177.8–185.3  $^\circ\text{C}$ .

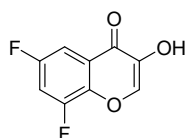

6,8-Difluoro-3-hydroxy-4H-chromen-4-one (**1i**). GP2. A scale of 9.7 mmol, solid, 0.860 g (4.4 mmol), isolated yield of 45%;  $^1\text{H}$  NMR (700 MHz,  $\text{CDCl}_3$ )  $\delta$  8.09 (s, 1H), 7.71 (ddd,  $J = 2.0, 3.0, 8.0$  Hz, 1H), 7.31–7.27 (m, 1H), 6.12 (s, 1H);  $^{13}\text{C}\{^1\text{H}\}$  NMR (176 MHz,  $\text{CDCl}_3$ )  $\delta$  171.9 (t,  $J=3.3$  Hz), 158.0 (dd,  $J=248.5, 9.8$  Hz), 151.8 (dd,  $J=258.3, 11.4$  Hz), 142.2 (d,  $J=9.8$  Hz), 141.8, 138.5, 123.9 (d,  $J=8.2$  Hz), 109.0 (dd,  $J=29.4, 19.6$  Hz), 105.4 (dd,  $J=22.9, 4.9$  Hz); IR  $\nu_{\text{max}}$ : 3321, 3099, 1641, 1619, 1583, 1499, 1451, 1433, 1297, 864, 768  $\text{cm}^{-1}$ ; HRMS (ESI-TOF)  $m/z$ : (M + H) $^+$  calcd for  $\text{C}_9\text{H}_5\text{F}_2\text{O}_3$  199.0207; found: 199.0203; mp 197.4–204.8  $^\circ\text{C}$ .

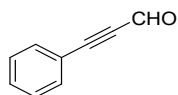

3-Phenylpropionaldehyde (**2a**). GP3. A scale of 25.0 mmol, liquid, 2.459 g (19.0 mmol), isolated yield of 76%;  $^1\text{H}$  NMR (700 MHz,  $\text{CDCl}_3$ )  $\delta$  9.43 (s, 1H), 7.63–7.58 (m, 2H), 7.50 (tdd,  $J = 1.2, 7.0, 8.0$  Hz, 1H), 7.43–7.39 (m, 2H);  $^{13}\text{C}\{^1\text{H}\}$  NMR (176 MHz,  $\text{CDCl}_3$ )  $\delta$  176.4, 132.9, 130.9, 128.4, 119.0, 94.7, 88.1; IR  $\nu_{\text{max}}$ : 2854, 2184, 1653, 1595, 1489  $\text{cm}^{-1}$ ; HRMS (ESI-TOF)  $m/z$ : (M + H) $^+$  calcd for  $\text{C}_9\text{H}_7\text{O}$  131.0497; found: 131.0499. The above analysis results correspond to the literature data.<sup>9</sup>

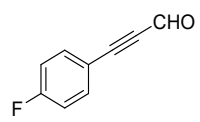 3-(4-Fluorophenyl)propionaldehyde (**2b**). GP3. A scale of 15.0 mmol, solid, 0.632 g (4.2 mmol), isolated yield of 28%;  $^1\text{H}$  NMR (700 MHz,  $\text{CDCl}_3$ )  $\delta$  9.43 (s, 1H), 7.67-7.61 (m, 2H), 7.16-7.10 (m, 2H);  $^{13}\text{C}\{^1\text{H}\}$  NMR (176 MHz,  $\text{CDCl}_3$ )  $\delta$  176.4, 164.3 (d,  $J=255.0$  Hz), 135.6 (d,  $J=9.8$  Hz), 116.3 (d,  $J=21.3$  Hz), 115.6 (d,  $J=3.3$  Hz), 93.8, 88.4; IR  $\nu_{\text{max}}$ : 2889, 2187, 1649, 1595, 1503  $\text{cm}^{-1}$ ; HRMS (ESI-TOF)  $m/z$ : (M + H) $^+$  calcd for  $\text{C}_9\text{H}_6\text{FO}$  149.0403; found: 149.0405; mp 44.6–48.2 °C. The above analysis results correspond to the literature data.<sup>10</sup>

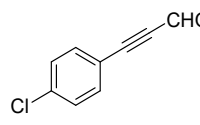 3-(4-Chlorophenyl)propionaldehyde (**2c**). GP3. A scale of 15.0 mmol, solid, 1.469 g (9.0 mmol), isolated yield of 60%;  $^1\text{H}$  NMR (700 MHz,  $\text{CDCl}_3$ )  $\delta$  9.41 (s, 1H), 7.55-7.52 (m, 2H), 7.41-7.37 (m, 2H);  $^{13}\text{C}\{^1\text{H}\}$  NMR (75 MHz,  $\text{CDCl}_3$ )  $\delta$  176.4, 137.8, 134.4, 129.2, 117.9, 93.5, 89.0; IR  $\nu_{\text{max}}$ : 2187, 1649, 1587, 1476  $\text{cm}^{-1}$ ; HRMS (ESI-TOF)  $m/z$ : (M + H) $^+$  calcd for  $\text{C}_9\text{H}_6^{35}\text{ClO}$  165.0107; found: 165.0108; mp 92.3–95.9 °C. The above analysis results correspond to the literature data.<sup>9</sup>

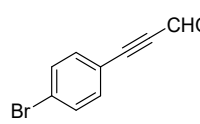 3-(4-Bromophenyl)propionaldehyde (**2d**). GP3. A scale of 15.0 mmol, solid, 1.050 g (5.0 mmol), isolated yield of 33%;  $^1\text{H}$  NMR (400 MHz,  $\text{CDCl}_3$ )  $\delta$  9.43 (s, 1H), 7.59-7.54 (m, 2H), 7.50-7.44 (m, 2H);  $^{13}\text{C}\{^1\text{H}\}$  NMR (101 MHz,  $\text{CDCl}_3$ )  $\delta$  176.4, 134.5, 132.2, 126.2, 118.4, 93.5, 89.1; IR  $\nu_{\text{max}}$ : 2972, 2890, 2188, 1649, 1581, 1474  $\text{cm}^{-1}$ ; HRMS (ESI-TOF)  $m/z$ : (M + H) $^+$  calcd for  $\text{C}_9\text{H}_6^{79}\text{BrO}$  208.9602; found: 208.9607; mp 95.5–98.0 °C. The above analysis results correspond to the literature data.<sup>10</sup>

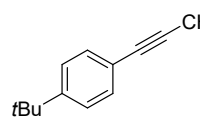 3-(4-(*tert*-Butyl)phenyl)propionaldehyde (**2e**). GP3. A scale of 15.0 mmol, solid, 1.110 g (6.0 mmol), isolated yield of 40%;  $^1\text{H}$  NMR (700 MHz,  $\text{CDCl}_3$ )  $\delta$  9.44 (s, 1H), 7.58-7.56 (m, 2H), 7.46-7.44 (m, 2H), 1.35 (s, 9H);  $^{13}\text{C}\{^1\text{H}\}$  NMR (176 MHz,  $\text{CDCl}_3$ )  $\delta$  176.8, 155.2, 133.3, 125.9, 116.4, 95.9, 88.5, 35.2, 31.0; IR  $\nu_{\text{max}}$ : 3042, 2955, 2906, 2868, 2185, 1651, 1598, 1502, 1477  $\text{cm}^{-1}$ ; HRMS (ESI-TOF)  $m/z$ : (M + H) $^+$  calcd for  $\text{C}_{13}\text{H}_{15}\text{O}$  187.1123; found: 187.1122; mp 40.5–43.1 °C. The above analysis results correspond to the literature data.<sup>10</sup>

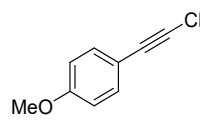 3-(4-Methoxyphenyl)propionaldehyde (**2f**). GP3. A scale of 15.0 mmol, solid, 2.214 g (13.8 mmol), isolated yield of 92%;  $^1\text{H}$  NMR (700 MHz,  $\text{CDCl}_3$ )  $\delta$  9.39 (s, 1H), 7.57-7.55 (m, 2H), 6.93-6.90 (m, 2H), 3.85 (s, 3H);  $^{13}\text{C}\{^1\text{H}\}$  NMR (75 MHz,  $\text{CDCl}_3$ )  $\delta$  176.7, 162.1, 135.4, 114.5, 111.1, 96.5, 88.7, 55.4; IR  $\nu_{\text{max}}$ : 2176, 1642, 1597, 1566, 1507  $\text{cm}^{-1}$ ; HRMS (ESI-TOF)  $m/z$ : (M + H) $^+$  calcd for  $\text{C}_{10}\text{H}_{10}\text{O}_2$  161.0603; found: 161.0602; mp 45.5–48.0 °C. The above analysis results correspond to the literature data.<sup>10</sup>

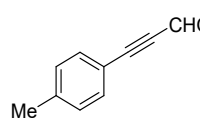 3-(*p*-Tolyl)propionaldehyde (**2g**). GP3. A scale of 15.0 mmol, liquid, 1.311 g (9.2 mmol), isolated yield of 61%;  $^1\text{H}$  NMR (700 MHz,  $\text{CDCl}_3$ )  $\delta$  9.43 (s, 1H), 7.53-7.51 (m, 2H), 7.25-7.22 (m, 2H), 2.42 (s, 3H);  $^{13}\text{C}\{^1\text{H}\}$  NMR (176 MHz,  $\text{CDCl}_3$ )  $\delta$  176.9, 142.2, 133.4, 129.6, 116.3, 96.0, 88.5, 21.8; IR  $\nu_{\text{max}}$ : 2921, 2854, 2737, 2180, 1651, 1604, 1507  $\text{cm}^{-1}$ ; HRMS (ESI-TOF)  $m/z$ : (M + H) $^+$  calcd for  $\text{C}_{10}\text{H}_9\text{O}$  145.0653; found: 145.0655. The above analysis results correspond to the literature data.<sup>10</sup>

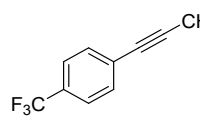 3-(4-(Trifluoromethyl)phenyl)propionaldehyde (**2h**). GP3. A scale of 15.0 mmol, solid, 0.629 g (3.2 mmol), isolated yield of 21%;  $^1\text{H}$  NMR (700 MHz,  $\text{CDCl}_3$ )  $\delta$  9.47 (s, 1H), 7.74 (d,  $J = 8.1$  Hz, 2H), 7.70 (d,  $J = 8.1$  Hz, 2H);  $^{13}\text{C}\{^1\text{H}\}$  NMR (176 MHz,  $\text{CDCl}_3$ )  $\delta$  176.2, 133.3, 132.7 (q,  $J=32.7$  Hz), 125.7 (q,  $J=3.3$  Hz), 123.3, 123.5 (q,  $J=273.0$  Hz), 92.1, 89.2; IR  $\nu_{\text{max}}$ : 2891, 2191, 1653, 1613, 1258  $\text{cm}^{-1}$ ; HRMS (ESI-TOF)  $m/z$ : (M + H) $^+$  calcd for  $\text{C}_{10}\text{H}_6\text{F}_3\text{O}$  199.0371; found: 199.0371; mp 36.3–38.7 °C. The above analysis results correspond to the literature data.<sup>10</sup>



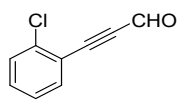 3-(2-Chlorophenyl)propionaldehyde (**2i**). GP3. A scale of 15.0 mmol, liquid, 1.700 g (10.3 mmol), isolated yield of 69%; <sup>1</sup>H NMR (400 MHz, CDCl<sub>3</sub>) δ 9.50 (s, 1H), 7.63 (ddd, *J* = 0.5, 1.7, 7.6 Hz, 1H), 7.51-7.40 (m, 2H), 7.35-7.29 (m, 1H); <sup>13</sup>C{<sup>1</sup>H} NMR (101 MHz, CDCl<sub>3</sub>) δ 176.4, 137.6, 135.0, 132.2, 129.8, 126.8, 119.8, 92.1, 90.9; IR *v*<sub>max</sub>: 2859, 2189, 1654, 1587, 1471 cm<sup>-1</sup>; HRMS (ESI-TOF) *m/z*: (M + H)<sup>+</sup> calcd for C<sub>9</sub>H<sub>6</sub><sup>35</sup>ClO 165.0107; found: 165.0105. The above analysis results correspond to the literature data.<sup>11</sup>

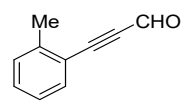 3-(*o*-Tolyl)propionaldehyde (**2j**). GP3. A scale of 7.5 mmol, liquid, 0.695 g (4.8 mmol), isolated yield of 64%; <sup>1</sup>H NMR (700 MHz, CDCl<sub>3</sub>) δ 9.46 (s, 1H), 7.56 (ddd, *J* = 0.4, 0.9, 7.7 Hz, 1H), 7.39-7.36 (m, 1H), 7.27 (tdd, *J* = 0.6, 1.3, 7.7 Hz, 1H), 7.23-7.20 (m, 1H), 2.50 (s, 3H); <sup>13</sup>C{<sup>1</sup>H} NMR (75 MHz, CDCl<sub>3</sub>) δ 176.8, 142.6, 133.8, 131.3, 129.9, 126.0, 119.2, 94.4, 92.2, 20.5; IR *v*<sub>max</sub>: 2863, 2181, 1653, 1598, 1483 cm<sup>-1</sup>; HRMS (ESI-TOF) *m/z*: (M + H)<sup>+</sup> calcd for C<sub>10</sub>H<sub>9</sub>O 145.0653; found: 145.0656. The above analysis results correspond to the literature data.<sup>9</sup>

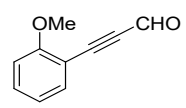 3-(2-Methoxyphenyl)propionaldehyde (**2k**). GP3. A scale of 15.0 mmol, liquid, 1.540 g (9.6 mmol), isolated yield of 64%; <sup>1</sup>H NMR (700 MHz, CDCl<sub>3</sub>) δ 9.47 (s, 1H), 7.55 (ddd, *J* = 0.4, 1.8, 7.7 Hz, 1H), 7.47 (ddd, *J* = 1.8, 7.5, 8.4 Hz, 1H), 6.98 (dt, *J* = 1.0, 7.5 Hz, 1H), 6.94 (d, *J* = 8.6 Hz, 1H), 3.93 (s, 3H); <sup>13</sup>C{<sup>1</sup>H} NMR (176 MHz, CDCl<sub>3</sub>) δ 176.8, 161.7, 135.1, 133.3, 120.7, 111.0, 108.4, 92.7, 92.5, 55.8; IR *v*<sub>max</sub>: 2946, 2840, 2739, 2177, 1648, 1594, 1573, 1489 cm<sup>-1</sup>; HRMS (ESI-TOF) *m/z*: (M + H)<sup>+</sup> calcd for C<sub>10</sub>H<sub>9</sub>O<sub>2</sub> 161.0603; found: 161.0601. The above analysis results correspond to the literature data.<sup>10</sup>

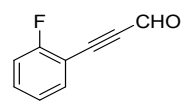 3-(2-Fluorophenyl)propionaldehyde (**2l**). GP3. A scale of 15.0 mmol, liquid, 0.920 g (6.2 mmol), isolated yield of 41%; <sup>1</sup>H NMR (700 MHz, CDCl<sub>3</sub>) δ 9.47 (s, 1H), 7.60 (ddd, *J* = 1.8, 6.6, 7.9 Hz, 1H), 7.53-7.49 (m, 1H), 7.21 (dt, *J* = 0.9, 7.6 Hz, 1H), 7.19-7.15 (m, 1H); <sup>13</sup>C{<sup>1</sup>H} NMR (75 MHz, CDCl<sub>3</sub>) δ 176.3, 163.7 (d, *J* = 256.7 Hz), 134.8, 133.3 (d, *J* = 8.2 Hz), 124.4 (d, *J* = 3.3 Hz), 116.0 (d, *J* = 19.6 Hz), 108.4 (d, *J* = 14.7 Hz), 92.5 (d, *J* = 3.3 Hz), 88.1; IR *v*<sub>max</sub>: 2862, 2742, 2191, 1656, 1609, 1574, 1489 cm<sup>-1</sup>; HRMS (ESI-TOF) *m/z*: (M + H)<sup>+</sup> calcd for C<sub>9</sub>H<sub>6</sub>FO 149.0403; found: 149.0401. The above analysis results correspond to the literature data.<sup>12</sup>

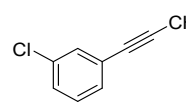 3-(3-Chlorophenyl)propionaldehyde (**2m**). GP3. A scale of 15.0 mmol, liquid, 1.441 g (8.7 mmol), isolated yield of 58%; <sup>1</sup>H NMR (700 MHz, CDCl<sub>3</sub>) δ 9.41 (s, 1H), 7.60-7.56 (m, 1H), 7.50-7.43 (m, 2H), 7.37-7.31 (m, 1H); <sup>13</sup>C{<sup>1</sup>H} NMR (75 MHz, CDCl<sub>3</sub>) δ 176.4, 134.7, 132.8, 131.5, 131.2, 130.0, 121.1, 92.7, 88.6; IR *v*<sub>max</sub>: 2190, 1657, 1589, 1560, 1473 cm<sup>-1</sup>; HRMS (ESI-TOF) *m/z*: (M + H)<sup>+</sup> calcd for C<sub>9</sub>H<sub>6</sub><sup>35</sup>ClO 165.0107; found: 165.0110. The above analysis results correspond to the literature data.<sup>11</sup>

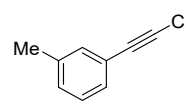 3-(*m*-Tolyl)propionaldehyde (**2n**). GP3. A scale of 15.0 mmol, liquid, 1.010 g (7.0 mmol), isolated yield of 47%; <sup>1</sup>H NMR (700 MHz, CDCl<sub>3</sub>) δ 9.44 (s, 1H), 7.46-7.42 (m, 2H), 7.34-7.30 (m, 2H), 2.39 (s, 3H); <sup>13</sup>C{<sup>1</sup>H} NMR (176 MHz, CDCl<sub>3</sub>) δ 176.8, 138.6, 133.7, 132.3, 130.4, 128.7, 119.2, 95.6, 88.3, 21.1; IR *v*<sub>max</sub>: 2922, 2855, 2737, 2183, 1655, 1578, 1481 cm<sup>-1</sup>; HRMS (ESI-TOF) *m/z*: (M + H)<sup>+</sup> calcd for C<sub>10</sub>H<sub>9</sub>O 145.0653; found: 145.0654. The above analysis results correspond to the literature data.<sup>9</sup>

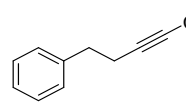 5-Phenylpent-2-ynal (**2o**). GP3. A scale of 15.0 mmol, liquid, 1.038 g (6.6 mmol), isolated yield of 44%; <sup>1</sup>H NMR (700 MHz, CDCl<sub>3</sub>) δ 9.18 (t, *J* = 0.9 Hz, 1H), 7.37-7.33 (m, 2H), 7.29-7.23 (m, 3H), 2.94 (t, *J* = 7.5 Hz, 2H), 2.74 (dt, *J* = 0.7, 7.5 Hz, 2H); <sup>13</sup>C{<sup>1</sup>H} NMR (176 MHz, CDCl<sub>3</sub>) δ 176.9, 139.5, 128.6, 128.4, 126.8, 97.9, 82.2, 33.8, 21.2; IR *v*<sub>max</sub>: 3029, 2929, 2860, 2742, 2197, 1659, 1602, 1495 cm<sup>-1</sup>; HRMS (ESI-TOF) *m/z*: (M + H)<sup>+</sup> calcd for C<sub>11</sub>H<sub>11</sub>O 159.0810; found: 159.0806. The above analysis results correspond to the literature data.<sup>13</sup>

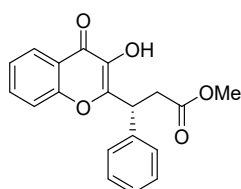

Methyl (*R*)-3-(3-hydroxy-4-oxo-4*H*-chromen-2-yl)-3-phenylpropanoate (**3aaa**). GP4. A scale of 0.25 mmol, opening time was equal to 24 h, solid, 61.95 mg (0.19 mmol), isolated yield of 77%, 95% *ee*;  $^1\text{H}$  NMR (700 MHz,  $\text{CDCl}_3$ )  $\delta$  8.22 (ddd,  $J = 0.4, 1.8, 7.9$  Hz, 1H), 7.67 (ddd,  $J = 1.5, 7.0, 8.6$  Hz, 1H), 7.53-7.50 (m, 1H), 7.49-7.45 (m, 2H), 7.39 (ddd,  $J = 1.0, 7.0, 8.0$  Hz, 1H), 7.37-7.33 (m, 2H), 7.30-7.27 (m, 1H), 6.36 (s, 1H), 5.01 (dd,  $J = 7.0, 9.0$  Hz, 1H), 3.66 (s, 3H), 3.39 (dd,  $J = 9.0, 16.5$  Hz, 1H), 3.16 (dd,  $J = 6.9, 16.4$  Hz, 1H);  $^{13}\text{C}\{^1\text{H}\}$  NMR (75 MHz,  $\text{CDCl}_3$ )  $\delta$  172.8, 171.4, 155.5, 150.5, 139.2, 137.8, 133.2, 128.8, 127.8, 127.6, 125.5, 124.5, 121.3, 118.2, 51.9, 41.0, 36.6; IR  $\nu_{\text{max}}$ : 3255, 1733, 1609, 1569, 1484, 1468, 1434, 1284, 1258, 754, 700,  $\text{cm}^{-1}$ ; HRMS (ESI-TOF)  $m/z$ : ( $\text{M} + \text{H}$ ) $^+$  calcd for  $\text{C}_{19}\text{H}_{17}\text{O}_5$  325.1076; found: 325.1079; mp 108.4–117.4  $^\circ\text{C}$ .

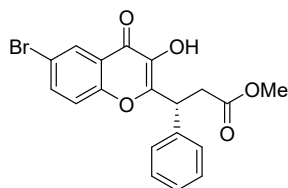

Methyl (*R*)-3-(6-bromo-3-hydroxy-4-oxo-4*H*-chromen-2-yl)-3-phenylpropanoate (**3baa**). GP4. A scale of 0.25 mmol, opening time was equal to 24 h, solid, 95.54 mg (0.24 mmol), isolated yield of 95%, 83% *ee*;  $^1\text{H}$  NMR (700 MHz,  $\text{CDCl}_3$ )  $\delta$  8.30 (d,  $J = 2.4$  Hz, 1H), 7.70 (dd,  $J = 2.6, 9.0$  Hz, 1H), 7.43-7.40 (m, 2H), 7.38 (d,  $J = 9.0$  Hz, 1H), 7.32 (t,  $J = 7.6$  Hz, 2H), 7.27-7.24 (m, 1H), 6.32 (s, 1H), 4.95 (dd,  $J = 7.0, 8.9$  Hz, 1H), 3.62 (s, 3H), 3.35 (dd,  $J = 9.1, 16.5$  Hz, 1H), 3.10 (dd,  $J = 6.8, 16.5$  Hz, 1H);  $^{13}\text{C}\{^1\text{H}\}$  NMR (176 MHz,  $\text{CDCl}_3$ )  $\delta$  171.6, 171.3, 154.2, 151.0, 139.0, 138.0, 136.2, 128.9, 128.0, 127.7, 127.7, 122.7, 120.1, 117.9, 51.9, 41.1, 36.5; IR  $\nu_{\text{max}}$ : 1736, 1621, 1601, 1584, 1566, 1530, 1495, 1467, 1455, 1436, 1266, 1201, 699  $\text{cm}^{-1}$ ; HRMS (ESI-TOF)  $m/z$ : ( $\text{M} + \text{H}$ ) $^+$  calcd for  $\text{C}_{19}\text{H}_{16}^{79}\text{BrO}_5$  403.0181; found: 403.0184; mp 132.7–143.2  $^\circ\text{C}$ .

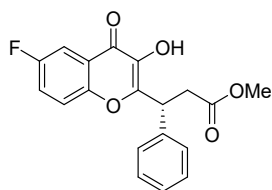

Methyl (*R*)-3-(6-fluoro-3-hydroxy-4-oxo-4*H*-chromen-2-yl)-3-phenylpropanoate (**3caa**). GP4. A scale of 0.25 mmol, opening time was equal to 24 h, solid, 59.05 mg (0.17 mmol), isolated yield of 69%, 88% *ee*;  $^1\text{H}$  NMR (700 MHz,  $\text{CDCl}_3$ )  $\delta$  7.80 (dd,  $J = 3.0, 8.0$  Hz, 1H), 7.49 (dd,  $J = 4.1, 9.2$  Hz, 1H), 7.42 (dd,  $J = 1.0, 8.1$  Hz, 2H), 7.37 (ddd,  $J = 3.0, 7.5, 9.3$  Hz, 1H), 7.34-7.30 (m, 2H), 7.28-7.24 (m, 1H), 6.31 (s, 1H), 4.97 (dd,  $J = 6.9, 9.0$  Hz, 1H), 3.63 (s, 3H), 3.36 (dd,  $J = 9.1, 16.5$  Hz, 1H), 3.11 (dd,  $J = 6.9, 16.6$  Hz, 1H);  $^{13}\text{C}\{^1\text{H}\}$  NMR (176 MHz,  $\text{CDCl}_3$ )  $\delta$  172.1 (d,  $J = 3.3$  Hz), 171.3, 158.4 (d,  $J = 246.9$  Hz), 151.8, 151.0, 139.1, 137.5, 128.9, 127.7, 127.7, 122.3 (d,  $J = 8.2$  Hz), 121.7 (d,  $J = 26.2$  Hz), 120.3 (d,  $J = 8.2$  Hz), 110.0 (d,  $J = 22.9$  Hz), 51.9, 41.2, 36.6; IR  $\nu_{\text{max}}$ : 1737, 1731, 1609, 1575, 1483, 1408, 1259, 1218, 762, 707  $\text{cm}^{-1}$ ; HRMS (ESI-TOF)  $m/z$ : ( $\text{M} + \text{H}$ ) $^+$  calcd for  $\text{C}_{19}\text{H}_{16}\text{FO}_5$  343.0982; found: 343.0981; mp 140.8–147.9  $^\circ\text{C}$ .

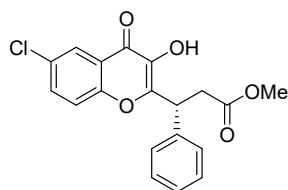

Methyl (*R*)-3-(6-chloro-3-hydroxy-4-oxo-4*H*-chromen-2-yl)-3-phenylpropanoate (**3daa**). GP4. A scale of 0.25 mmol, opening time was equal to 24 h, solid, 76.25 mg (0.21 mmol), isolated yield of 85%, 91% *ee*;  $^1\text{H}$  NMR (700 MHz,  $\text{CDCl}_3$ )  $\delta$  8.14 (d,  $J = 2.6$  Hz, 1H), 7.57 (dd,  $J = 2.6, 9.0$  Hz, 1H), 7.44 (dd,  $J = 0.4, 9.0$  Hz, 1H), 7.43-7.40 (m, 2H), 7.32 (t,  $J = 7.5$  Hz, 2H), 7.28-7.25 (m, 1H), 6.23 (s, 1H), 4.95 (dd,  $J = 6.7, 9.2$  Hz, 1H), 3.63 (s, 3H), 3.35 (dd,  $J = 9.1, 16.5$  Hz, 1H), 3.11 (dd,  $J = 6.8, 16.5$  Hz, 1H);  $^{13}\text{C}\{^1\text{H}\}$  NMR (176 MHz,  $\text{CDCl}_3$ )  $\delta$  171.7, 171.3, 153.8, 151.0, 139.0, 137.9, 133.5, 130.6, 128.9, 127.7, 127.7, 124.7, 122.2, 119.9, 51.9, 41.1, 36.5; IR  $\nu_{\text{max}}$ : 3286, 1733, 1621, 1604, 1566, 1469, 1453, 1263, 1227, 698  $\text{cm}^{-1}$ ; HRMS (ESI-TOF)  $m/z$ : ( $\text{M} + \text{H}$ ) $^+$  calcd for  $\text{C}_{19}\text{H}_{16}^{35}\text{ClO}_5$  359.0686; found: 359.0688; mp 125.8–135.2  $^\circ\text{C}$ .

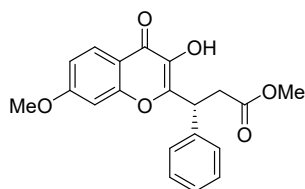

Methyl (*R*)-3-(3-hydroxy-7-methoxy-4-oxo-4*H*-chromen-2-yl)-3-phenylpropanoate (**3eaa**). GP4. A scale of 0.25 mmol, opening time was equal to 24 h, solid, 58.13 mg (0.16 mmol), isolated yield of 66%, 98% *ee*;  $^1\text{H}$  NMR

(700 MHz, CDCl<sub>3</sub>)  $\delta$  8.06 (d,  $J$  = 8.8 Hz, 1H), 7.44-7.41 (m, 2H), 7.32 (t,  $J$  = 7.7 Hz, 2H), 7.25-7.23 (m, 1H), 6.94 (dd,  $J$  = 2.4, 8.8 Hz, 1H), 6.84 (d,  $J$  = 2.4 Hz, 1H), 6.26 (s, 1H), 4.92 (dd,  $J$  = 7.1, 9.0 Hz, 1H), 3.90 (s, 3H), 3.62 (s, 3H), 3.34 (dd,  $J$  = 9.0, 16.3 Hz, 1H), 3.11 (dd,  $J$  = 6.9, 16.3 Hz, 1H); <sup>13</sup>C{<sup>1</sup>H} NMR (176 MHz, CDCl<sub>3</sub>)  $\delta$  172.3, 171.4, 164.0, 157.4, 149.5, 139.5, 137.5, 128.8, 127.7, 127.5, 126.8, 115.2, 114.7, 100.0, 55.8, 51.8, 41.1, 36.7; IR  $\nu_{\max}$ : 3275, 1723, 1632, 1601, 1505, 1447, 1436, 1423, 1270, 1218, 706, 697 cm<sup>-1</sup>; HRMS (ESI-TOF)  $m/z$ : (M + H)<sup>+</sup> calcd for C<sub>20</sub>H<sub>19</sub>O<sub>6</sub> 355.1182; found: 355.1184; mp 136.9–145.0 °C.

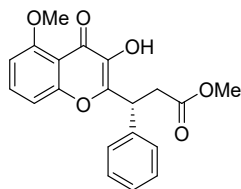

Methyl (R)-3-(3-hydroxy-5-methoxy-4-oxo-4H-chromen-2-yl)-3-phenylpropanoate (**3faa**). GP4. A scale of 0.25 mmol, opening time was equal to 24 h, solid, 86.27 mg (0.24 mmol), isolated yield of 97%, 99% *ee*; <sup>1</sup>H NMR (700 MHz, CDCl<sub>3</sub>)  $\delta$  7.51 (t,  $J$  = 8.4 Hz, 1H), 7.43-7.40 (m, 2H), 7.33-7.29 (m, 2H), 7.25-7.23 (m, 1H), 7.03 (dd,  $J$  = 1.0, 8.6 Hz, 1H), 6.73 (d,  $J$  = 7.6 Hz, 1H), 6.58 (s, 1H), 4.88 (dd,  $J$  = 7.2, 8.8 Hz, 1H), 3.97 (s, 3H), 3.61 (s, 3H), 3.31 (dd,  $J$  = 8.8, 16.3 Hz, 1H), 3.10 (dd,  $J$  = 7.2, 16.3 Hz, 1H); <sup>13</sup>C{<sup>1</sup>H} NMR (75 MHz, CDCl<sub>3</sub>)  $\delta$  172.4, 171.4, 159.7, 157.5, 147.6, 139.3, 138.0, 133.5, 128.8, 127.7, 127.5, 111.9, 110.3, 105.1, 56.4, 51.9, 41.0, 36.6; IR  $\nu_{\max}$ : 1733, 1606, 1480, 1438, 1258, 1228, 699 cm<sup>-1</sup>; HRMS (ESI-TOF)  $m/z$ : (M + H)<sup>+</sup> calcd for C<sub>20</sub>H<sub>19</sub>O<sub>6</sub> 355.1182; found: 355.1181; mp 74.4–87.7 °C.

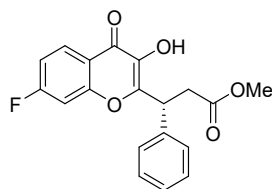

Methyl (R)-3-(7-fluoro-3-hydroxy-4-oxo-4H-chromen-2-yl)-3-phenylpropanoate (**3gaa**). GP4. A scale of 0.25 mmol, opening time was equal to 24 h, solid, 84.35 mg (0.25 mmol), isolated yield of 99%, 93% *ee*; <sup>1</sup>H NMR (700 MHz, CDCl<sub>3</sub>)  $\delta$  8.22 (dd,  $J$  = 6.2, 9.0 Hz, 1H), 7.46-7.43 (m, 2H), 7.35 (t,  $J$  = 7.7 Hz, 2H), 7.31-7.29 (m, 1H), 7.20 (dd,  $J$  = 2.3, 9.1 Hz, 1H), 7.14 (ddd,  $J$  = 2.4, 8.1, 8.8 Hz, 1H), 6.28 (s, 1H), 4.97 (dd,  $J$  = 6.7, 9.1 Hz, 1H), 3.66 (s, 3H), 3.37 (dd,  $J$  = 9.1, 16.4 Hz, 1H), 3.13 (dd,  $J$  = 6.8, 16.5 Hz, 1H); <sup>13</sup>C{<sup>1</sup>H} NMR (75 MHz, CDCl<sub>3</sub>)  $\delta$  172.1, 171.4, 165.4 (d,  $J$  = 255.3 Hz), 156.4 (d,  $J$  = 13.1 Hz), 150.7 (d,  $J$  = 2.1 Hz), 139.0, 137.7, 128.9, 128.0 (d,  $J$  = 10.4 Hz), 127.7, 127.6, 118.1 (d,  $J$  = 2.1 Hz), 113.8 (d,  $J$  = 23.5 Hz), 104.7 (d,  $J$  = 25.6 Hz), 51.9, 41.0, 36.4; IR  $\nu_{\max}$ : 3287, 1732, 1639, 1607, 1496, 1452, 1423, 1253, 1237, 704 cm<sup>-1</sup>; HRMS (ESI-TOF)  $m/z$ : (M + H)<sup>+</sup> calcd for C<sub>19</sub>H<sub>16</sub>FO<sub>5</sub> 343.0982; found: 343.0984; mp 141.6–149.5 °C.

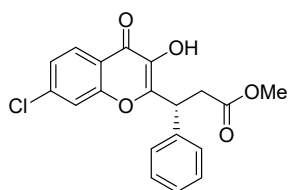

Methyl (R)-3-(7-chloro-3-hydroxy-4-oxo-4H-chromen-2-yl)-3-phenylpropanoate (**3haa**). GP4. A scale of 0.25 mmol, opening time was equal to 24 h, solid, 75.06 mg (0.21 mmol), isolated yield of 84%, 93% *ee*; <sup>1</sup>H NMR (700 MHz, CDCl<sub>3</sub>)  $\delta$  8.11 (d,  $J$  = 8.6 Hz, 1H), 7.52 (d,  $J$  = 1.9 Hz, 1H), 7.43-7.40 (m, 2H), 7.35-7.31 (m, 3H), 7.28-7.26 (m, 1H), 6.22 (s, 1H), 4.94 (dd,  $J$  = 6.8, 9.1 Hz, 1H), 3.63 (s, 3H), 3.34 (dd,  $J$  = 9.3, 16.3 Hz, 1H), 3.10 (dd,  $J$  = 6.8, 16.5 Hz, 1H); <sup>13</sup>C{<sup>1</sup>H} NMR (75 MHz, CDCl<sub>3</sub>)  $\delta$  172.1, 171.3, 155.5, 150.7, 139.5, 138.9, 137.9, 128.9, 127.7, 127.7, 126.8, 125.5, 119.8, 118.2, 51.9, 41.0, 36.4; IR  $\nu_{\max}$ : 3286, 1722, 1629, 1602, 1560, 1442, 1264, 1221, 705, 697 cm<sup>-1</sup>; HRMS (ESI-TOF)  $m/z$ : (M + H)<sup>+</sup> calcd for C<sub>19</sub>H<sub>16</sub><sup>35</sup>ClO<sub>5</sub> 359.0686; found: 359.0689; mp 143.4–150.2 °C.

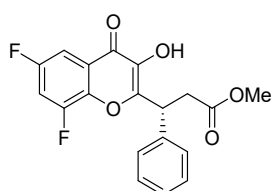

Methyl (R)-3-(6,8-difluoro-3-hydroxy-4-oxo-4H-chromen-2-yl)-3-phenylpropanoate (**3iaa**). GP4. A scale of 0.25 mmol, opening time was equal to 24 h, solid, 66.74 mg (0.19 mmol), isolated yield of 74%, 56% *ee*; <sup>1</sup>H NMR (700 MHz, CDCl<sub>3</sub>)  $\delta$  7.64 (ddd,  $J$  = 2.0, 2.9, 7.9 Hz, 1H), 7.50-7.46 (m, 2H), 7.38-7.35 (m, 2H), 7.32-7.29 (m, 1H), 7.24 (ddd,  $J$  = 3.0, 7.7, 10.2 Hz, 1H), 6.30 (s, 1H), 5.00 (dd,  $J$  = 6.7, 9.4 Hz, 1H), 3.67 (s, 3H), 3.41 (dd,  $J$  = 9.2, 16.7 Hz, 1H), 3.15 (dd,  $J$  = 6.8, 16.5 Hz, 1H); <sup>13</sup>C{<sup>1</sup>H} NMR (75 MHz, CDCl<sub>3</sub>)  $\delta$  171.4, 157.8 (dd,  $J$  = 249.1, 9.7 Hz), 151.4, 151.5 (dd,  $J$  = 258.1,

11.8 Hz), 141.2 (dd,  $J=12.5, 2.1$  Hz), 138.7, 137.8, 129.0, 127.9, 127.8, 123.4 (d,  $J=9.0$  Hz), 108.7 (dd,  $J=29.1, 20.1$  Hz), 105.4 (dd,  $J=23.5, 4.8$  Hz), 52.0, 40.9, 36.4; IR  $\nu_{\max}$ : 3285, 1731, 1619, 1587, 1494, 1422, 1247, 1225, 701  $\text{cm}^{-1}$ ; HRMS (ESI-TOF)  $m/z$ : (M + H)<sup>+</sup> calcd for C<sub>19</sub>H<sub>15</sub>F<sub>2</sub>O<sub>5</sub> 361.0888; found: 361.0887; mp 116.1–124.2 °C.

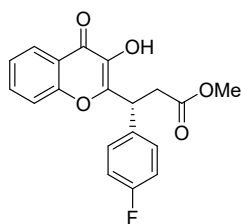

Methyl (R)-3-(4-fluorophenyl)-3-(3-hydroxy-4-oxo-4H-chromen-2-yl)propanoate (**3aba**). GP4. A scale of 0.25 mmol, opening time was equal to 24 h,

solid, 69.92 mg (0.20 mmol), isolated yield of 82%, 80% *ee*; <sup>1</sup>H NMR (700 MHz, CDCl<sub>3</sub>)  $\delta$  8.22 (dd,  $J = 0.4, 7.9$  Hz, 1H), 7.68 (ddd,  $J = 1.8, 7.0, 8.6$  Hz, 1H), 7.51 (dd,  $J = 0.4, 8.6$  Hz, 1H), 7.46-7.42 (m, 2H), 7.40 (ddd,  $J = 1.0, 7.0, 8.0$  Hz, 1H), 7.08-6.99 (m, 2H), 6.40 (s, 1H), 4.99 (t,  $J = 7.9$  Hz, 1H), 3.66 (s, 3H), 3.34 (dd,  $J = 8.5, 16.4$  Hz, 1H), 3.14 (dd,  $J = 7.4, 16.4$  Hz, 1H); <sup>13</sup>C{<sup>1</sup>H} NMR (176 MHz, CDCl<sub>3</sub>)  $\delta$  172.8, 171.2, 162.2 (d,  $J=245.2$  Hz), 155.5, 150.2, 137.7, 135.0 (d,  $J=3.3$  Hz), 133.3, 129.4 (d,  $J=8.2$  Hz), 125.6, 124.6, 121.3, 118.1, 115.7 (d,  $J=21.3$  Hz), 51.9, 40.4, 36.7; IR  $\nu_{\max}$ : 3256, 1738, 1622, 1608, 1569, 1509, 1469, 1437, 1288, 1217, 755  $\text{cm}^{-1}$ ; HRMS (ESI-TOF)  $m/z$ : (M + H)<sup>+</sup> calcd for C<sub>19</sub>H<sub>16</sub>FO<sub>5</sub> 343.0982; found: 343.0980; mp 120.5–122.8 °C.

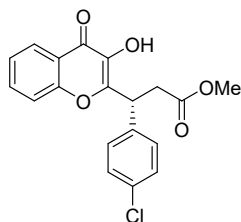

Methyl (R)-3-(4-chlorophenyl)-3-(3-hydroxy-4-oxo-4H-chromen-2-yl)propanoate (**3aca**). GP4. A scale of 0.25 mmol, opening time was equal to 24 h,

solid, 59.20 mg (0.17 mmol), isolated yield of 66%, 93% *ee*; <sup>1</sup>H NMR (700 MHz, CDCl<sub>3</sub>)  $\delta$  8.23-8.20 (m, 1H), 7.68 (ddd,  $J = 1.8, 7.0, 8.6$  Hz, 1H), 7.52-7.49 (m, 1H), 7.43-7.39 (m, 3H), 7.34-7.30 (m, 2H), 4.97 (t,  $J = 7.9$  Hz, 1H), 3.66 (s, 3H), 3.34 (dd,  $J = 8.5, 16.4$  Hz, 1H), 3.14 (dd,  $J = 7.5, 16.5$  Hz, 1H); <sup>13</sup>C{<sup>1</sup>H} NMR (176 MHz, CDCl<sub>3</sub>)  $\delta$  172.8, 171.1, 155.5, 149.8, 137.7, 133.5, 133.3, 129.1, 129.0, 125.6, 124.6, 121.3, 118.1, 51.9, 40.5, 36.5; IR  $\nu_{\max}$ : 3266, 2955, 1731, 1612, 1574, 1493, 1481, 1470, 1440, 1426, 1291, 1256, 1223, 758, 703  $\text{cm}^{-1}$ ; HRMS (ESI-TOF)  $m/z$ : (M + H)<sup>+</sup> calcd for C<sub>19</sub>H<sub>16</sub><sup>35</sup>ClO<sub>5</sub> 359.0686; found: 359.0687; mp 153.5–155.2 °C.

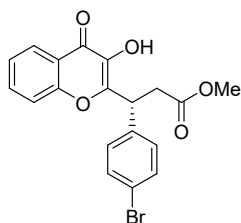

Methyl (R)-3-(4-bromophenyl)-3-(3-hydroxy-4-oxo-4H-chromen-2-yl)propanoate (**3ada**). GP4. A scale of 0.25 mmol, opening time was equal to 24 h, solid, 87.57 mg (0.22 mmol), isolated yield of 87%, 83% *ee*; <sup>1</sup>H NMR (700 MHz, CDCl<sub>3</sub>)  $\delta$  8.22 (ddd,  $J = 0.4, 1.8, 7.9$  Hz, 1H), 7.68 (ddd,  $J = 1.8, 6.8, 8.6$  Hz, 1H), 7.52-7.49 (m, 1H), 7.47 (d,  $J = 8.6$  Hz, 2H), 7.42-7.39 (m, 1H), 7.35 (s, 2H), 6.41 (s, 1H), 4.97 (t,  $J = 7.9$  Hz, 1H), 3.66 (s, 3H), 3.34 (dd,  $J = 8.5, 16.4$  Hz, 1H), 3.15 (dd,  $J = 7.6, 16.4$  Hz, 1H); <sup>13</sup>C{<sup>1</sup>H} NMR (101 MHz, CDCl<sub>3</sub>)  $\delta$  172.9, 171.1, 155.5, 149.8, 138.3, 137.8, 133.4, 132.0, 129.5, 127.8, 125.6, 124.6, 121.6, 118.1, 52.0, 40.5, 36.4; IR  $\nu_{\max}$ : 3270, 2950, 1732, 1610, 1570, 1484, 1469, 1434, 757, 702  $\text{cm}^{-1}$ ; HRMS (ESI-TOF)  $m/z$ : (M + H)<sup>+</sup> calcd for C<sub>19</sub>H<sub>16</sub><sup>79</sup>BrO<sub>5</sub> 403.0181; found: 403.0185; mp 123.6–128.9 °C.

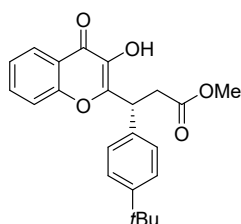

Methyl (R)-3-(4-(*tert*-butyl)phenyl)-3-(3-hydroxy-4-oxo-4H-chromen-2-yl)propanoate (**3aea**). GP4. A scale of 0.25 mmol, opening time was equal to 24 h,

solid, 48.90 mg (0.13 mmol), isolated yield of 51%, 92% *ee*; <sup>1</sup>H NMR (700 MHz, CDCl<sub>3</sub>)  $\delta$  8.21 (dd,  $J = 1.5, 7.9$  Hz, 1H), 7.67 (ddd,  $J = 1.8, 7.3, 8.4$  Hz, 1H), 7.52 (dd,  $J = 0.4, 8.6$  Hz, 1H), 7.41-7.38 (m, 3H), 7.37-7.34 (m, 2H), 6.28 (s, 1H), 4.97 (dd,  $J = 6.6, 9.2$  Hz, 1H), 3.65 (s, 3H), 3.40 (dd,  $J = 9.2, 16.5$  Hz, 1H), 3.12 (dd,  $J = 6.6, 16.5$  Hz, 1H), 1.30 (s, 9H); <sup>13</sup>C{<sup>1</sup>H} NMR (176 MHz, CDCl<sub>3</sub>)  $\delta$  172.8, 171.5, 155.6, 150.7, 150.5, 137.8, 136.2, 133.1, 127.4, 125.8, 125.5, 124.4, 121.4, 118.2, 51.8, 40.6, 36.7, 34.4, 31.3; IR  $\nu_{\max}$ : 3282, 2956, 1732, 1624, 1612, 1573, 1516, 1469, 1429, 1290, 1226, 763, 753  $\text{cm}^{-1}$ ; HRMS (ESI-TOF)  $m/z$ : (M + H)<sup>+</sup> calcd for C<sub>23</sub>H<sub>25</sub>O<sub>5</sub> 381.1702; found: 381.1705; mp 153.3–162.5 °C.

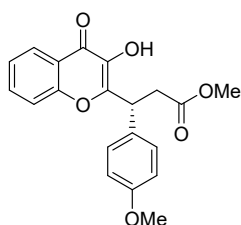

Methyl (*R*)-3-(3-hydroxy-4-oxo-4*H*-chromen-2-yl)-3-(4-methoxyphenyl)propanoate (**3afa**). GP4. A scale of 0.25 mmol, opening time was equal to 24 h, solid, 59.36 mg (0.17 mmol), isolated yield of 67%, 94% *ee*;  $^1\text{H}$  NMR (700 MHz,  $\text{CDCl}_3$ )  $\delta$  8.21 (dd,  $J = 1.2, 8.0$  Hz, 1H), 7.66 (ddd,  $J = 1.5, 7.1, 8.5$  Hz, 1H), 7.51 (d,  $J = 7.9$  Hz, 1H), 7.42-7.37 (m, 3H), 6.90-6.86 (m, 2H), 6.39 (s, 1H), 4.96 (t,  $J = 7.9$  Hz, 1H), 3.79 (s, 3H), 3.65 (s, 3H), 3.35 (dd,  $J = 8.8, 16.3$  Hz, 1H), 3.13 (dd,  $J = 7.3, 16.3$  Hz, 1H);  $^{13}\text{C}\{^1\text{H}\}$  NMR (176 MHz,  $\text{CDCl}_3$ )  $\delta$  172.8, 171.4, 159.1, 155.5, 150.8, 137.6, 133.1, 131.3, 128.8, 125.5, 124.5, 121.3, 118.1, 114.3, 55.2, 51.8, 40.4, 36.8; IR  $\nu_{\text{max}}$ : 3277, 2998, 1733, 1611, 1574, 1513, 1466, 1436, 1418, 1289, 1263, 1223, 758, 702  $\text{cm}^{-1}$ ; HRMS (ESI-TOF)  $m/z$ : ( $\text{M} + \text{H}$ ) $^+$  calcd for  $\text{C}_{20}\text{H}_{19}\text{O}_6$  355.1182; found: 355.1180; mp 150.3–152.6  $^\circ\text{C}$ .

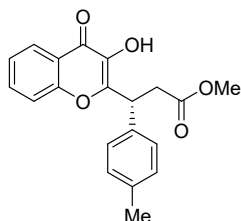

Methyl (*R*)-3-(3-hydroxy-4-oxo-4*H*-chromen-2-yl)-3-(*p*-tolyl)propanoate (**3aga**). GP4. A scale of 0.25 mmol, opening time was equal to 24 h, solid, 80.33 mg (0.24 mmol), isolated yield of 95%, 93% *ee*;  $^1\text{H}$  NMR (700 MHz,  $\text{CDCl}_3$ )  $\delta$  8.21 (dd,  $J = 1.3, 8.1$  Hz, 1H), 7.66 (ddd,  $J = 1.8, 7.0, 8.6$  Hz, 1H), 7.51 (dd,  $J = 0.6, 8.5$  Hz, 1H), 7.39 (ddd,  $J = 1.0, 7.0, 8.0$  Hz, 1H), 7.37-7.34 (m, 2H), 7.16 (d,  $J = 7.9$  Hz, 2H), 6.39 (s, 1H), 4.97 (dd,  $J = 7.0, 9.0$  Hz, 1H), 3.65 (s, 3H), 3.37 (dd,  $J = 8.9, 16.4$  Hz, 1H), 3.14 (dd,  $J = 6.9, 16.4$  Hz, 1H), 2.33 (s, 3H);  $^{13}\text{C}\{^1\text{H}\}$  NMR (176 MHz,  $\text{CDCl}_3$ )  $\delta$  172.9, 171.5, 155.5, 151.0, 137.8, 137.3, 136.3, 133.1, 129.5, 127.7, 125.5, 124.5, 121.4, 118.1, 51.8, 40.7, 36.7, 21.0; IR  $\nu_{\text{max}}$ : 3297, 1730, 1621, 1613, 1574, 1471, 1432, 1418, 1287, 1256, 1218, 757, 703  $\text{cm}^{-1}$ ; HRMS (ESI-TOF)  $m/z$ : ( $\text{M} + \text{H}$ ) $^+$  calcd for  $\text{C}_{20}\text{H}_{19}\text{O}_5$  339.1232; found: 339.1233; mp 129.3–135.8  $^\circ\text{C}$ .

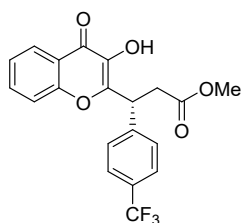

Methyl (*R*)-3-(3-hydroxy-4-oxo-4*H*-chromen-2-yl)-3-(4-(trifluoromethyl)phenyl)propanoate (**3aha**). GP4. A scale of 0.25 mmol, opening time was equal to 24 h, solid, 64.60 mg (0.16 mmol), isolated yield of 66%, 63% *ee*;  $^1\text{H}$  NMR (700 MHz,  $\text{CDCl}_3$ )  $\delta$  8.22 (dd,  $J = 1.3, 7.9$  Hz, 1H), 7.69 (ddd,  $J = 1.7, 7.1, 8.6$  Hz, 1H), 7.63-7.58 (m, 4H), 7.52 (d,  $J = 8.6$  Hz, 1H), 7.41 (ddd,  $J = 1.0, 7.1, 8.0$  Hz, 1H), 6.50 (s, 1H), 5.08 (t,  $J = 7.8$  Hz, 1H), 3.67 (s, 3H), 3.38 (dd,  $J = 8.4, 16.5$  Hz, 1H), 3.20 (dd,  $J = 7.5, 16.5$  Hz, 1H);  $^{13}\text{C}\{^1\text{H}\}$  NMR (176 MHz,  $\text{CDCl}_3$ )  $\delta$  172.8, 171.0, 155.6, 149.4, 143.2, 137.9, 133.4, 130.0 (q,  $J = 32.7$  Hz), 128.2, 125.8 (q,  $J = 3.3$  Hz), 125.6, 124.7, 122.4 (q,  $J = 271.4$  Hz), 121.3, 118.1, 52.0, 40.9, 36.3; IR  $\nu_{\text{max}}$ : 3292, 2955, 1737, 1611, 1572, 1469, 1420, 1291, 1231, 757, 705  $\text{cm}^{-1}$ ; HRMS (ESI-TOF)  $m/z$ : ( $\text{M} + \text{H}$ ) $^+$  calcd for  $\text{C}_{20}\text{H}_{16}\text{F}_3\text{O}_5$  393.0950; found: 393.0952; mp 121.5–124.2  $^\circ\text{C}$ .

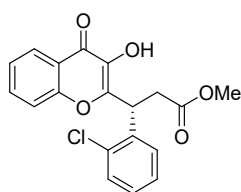

Methyl (*R*)-3-(2-chlorophenyl)-3-(3-hydroxy-4-oxo-4*H*-chromen-2-yl)propanoate (**3aia**). GP4. A scale of 0.25 mmol, opening time was equal to 24 h, solid, 86.74 mg (0.24 mmol), isolated yield of 97%, 92% *ee*;  $^1\text{H}$  NMR (700 MHz,  $\text{CDCl}_3$ )  $\delta$  8.20 (dd,  $J = 1.4, 8.0$  Hz, 1H), 7.65 (ddd,  $J = 1.7, 7.0, 8.6$  Hz, 1H), 7.47 (dd,  $J = 0.6, 8.6$  Hz, 1H), 7.42-7.37 (m, 3H), 7.24-7.19 (m, 2H), 6.26 (s, 1H), 5.42 (dd,  $J = 6.2, 9.5$  Hz, 1H), 3.64 (s, 3H), 3.33 (dd,  $J = 9.6, 16.5$  Hz, 1H), 3.08 (dd,  $J = 6.2, 16.6$  Hz, 1H);  $^{13}\text{C}\{^1\text{H}\}$  NMR (176 MHz,  $\text{CDCl}_3$ )  $\delta$  172.8, 171.1, 155.6, 149.2, 138.5, 136.9, 133.9, 133.3, 130.0, 128.8, 128.7, 127.2, 125.6, 124.6, 121.3, 118.2, 51.9, 38.6, 36.3; IR  $\nu_{\text{max}}$ : 3062, 1732, 1620, 1610, 1567, 1471, 1434, 1292, 1225, 755, 695  $\text{cm}^{-1}$ ; HRMS (ESI-TOF)  $m/z$ : ( $\text{M} + \text{H}$ ) $^+$  calcd for  $\text{C}_{19}\text{H}_{16}^{35}\text{ClO}_5$  359.0686; found: 359.0689; mp 133.8–136.4  $^\circ\text{C}$ .

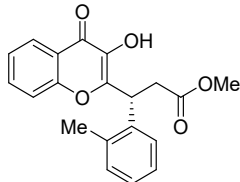

Methyl (*R*)-3-(3-hydroxy-4-oxo-4*H*-chromen-2-yl)-3-(*o*-tolyl)propanoate (**3aja**). GP4. A scale of 0.25 mmol, opening time was equal to 24 h, oil, 56.65 mg (0.17 mmol), isolated yield of 67%, 89% *ee*;  $^1\text{H NMR}$  (700 MHz,  $\text{CDCl}_3$ )  $\delta$  8.21 (dd,  $J = 1.4, 8.0$  Hz, 1H), 7.67 (ddd,  $J = 1.8, 7.0, 8.6$  Hz, 1H), 7.51 (d,  $J = 8.6$  Hz, 1H), 7.49-7.45 (m, 1H), 7.40 (ddd,  $J = 1.0, 7.1, 8.0$  Hz, 1H), 7.23-7.15 (m, 3H), 6.33 (s, 1H), 5.24 (dd,  $J = 6.9, 8.7$  Hz, 1H), 3.65 (s, 3H), 3.34 (dd,  $J = 8.8, 16.3$  Hz, 1H), 3.11 (dd,  $J = 6.9, 16.4$  Hz, 1H), 2.56 (s, 3H);  $^{13}\text{C}\{^1\text{H}\}$  NMR (176 MHz,  $\text{CDCl}_3$ )  $\delta$  172.8, 171.5, 155.6, 150.5, 137.8, 137.6, 136.5, 133.2, 130.8, 127.4, 127.1, 126.4, 125.5, 124.5, 121.3, 118.1, 51.8, 37.0, 36.9, 19.7; IR  $\nu_{\text{max}}$ : 3272, 3066, 1734, 1610, 1567, 1483, 1468, 1435, 1422, 1290, 1231, 756  $\text{cm}^{-1}$ ; HRMS (ESI-TOF)  $m/z$ : ( $\text{M} + \text{H}$ ) $^+$  calcd for  $\text{C}_{20}\text{H}_{19}\text{O}_5$  339.1232; found: 339.1232.

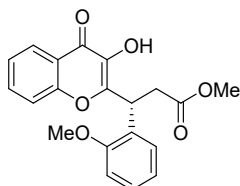

Methyl (*R*)-3-(3-hydroxy-4-oxo-4*H*-chromen-2-yl)-3-(2-methoxyphenyl)propanoate (**3aka**). GP4. A scale of 0.25 mmol, opening time was equal to 24 h, solid, 24.54 mg (0.07 mmol), isolated yield of 28%, 91% *ee*;  $^1\text{H NMR}$  (700 MHz,  $\text{CDCl}_3$ )  $\delta$  8.25-8.22 (m, 1H), 7.66 (ddd,  $J = 1.8, 7.0, 8.6$  Hz, 1H), 7.50 (dd,  $J = 0.4, 8.6$  Hz, 1H), 7.40 (ddd,  $J = 1.0, 7.0, 8.0$  Hz, 1H), 7.30 (dd,  $J = 1.7, 7.6$  Hz, 1H), 7.27 (ddd,  $J = 1.5, 7.5, 8.1$  Hz, 1H), 6.92 (dq,  $J = 1.0, 7.7$  Hz, 2H), 6.31 (s, 1H), 5.36 (dd,  $J = 5.7, 10.1$  Hz, 1H), 3.87 (s, 3H), 3.65 (s, 3H), 3.35 (dd,  $J = 10.1, 16.5$  Hz, 1H), 3.07 (dd,  $J = 5.7, 16.5$  Hz, 1H);  $^{13}\text{C}\{^1\text{H}\}$  NMR (176 MHz,  $\text{CDCl}_3$ )  $\delta$  172.8, 171.8, 156.9, 155.6, 150.8, 138.4, 133.0, 128.6, 128.3, 127.7, 125.5, 124.4, 121.4, 120.8, 118.2, 111.1, 55.7, 51.7, 36.0, 35.5; IR  $\nu_{\text{max}}$ : 3164, 2995, 1735, 1621, 1611, 1586, 1567, 1491, 1470, 1433, 1291, 1228, 754  $\text{cm}^{-1}$ ; HRMS (ESI-TOF)  $m/z$ : ( $\text{M} + \text{H}$ ) $^+$  calcd for  $\text{C}_{20}\text{H}_{19}\text{O}_6$  355.1182; found: 355.1183; mp 114.2–122.5  $^{\circ}\text{C}$ .

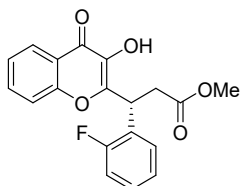

Methyl (*R*)-3-(2-fluorophenyl)-3-(3-hydroxy-4-oxo-4*H*-chromen-2-yl)propanoate (**3ala**). GP4. A scale of 0.25 mmol, opening time was equal to 24 h, solid, 72.94 mg (0.21 mmol), isolated yield of 85%, 87% *ee*;  $^1\text{H NMR}$  (700 MHz,  $\text{CDCl}_3$ )  $\delta$  8.22 (dd,  $J = 1.4, 8.0$  Hz, 1H), 7.67 (ddd,  $J = 1.5, 7.0, 8.6$  Hz, 1H), 7.51 (dd,  $J = 0.4, 8.6$  Hz, 1H), 7.45 (dt,  $J = 1.7, 7.6$  Hz, 1H), 7.40 (ddd,  $J = 1.0, 7.1, 8.0$  Hz, 1H), 7.28-7.25 (m, 1H), 7.13 (dt,  $J = 1.1, 7.6$  Hz, 1H), 7.08 (ddd,  $J = 1.1, 8.4, 10.3$  Hz, 1H), 6.46 (s, 1H), 5.28 (dd,  $J = 6.7, 9.1$  Hz, 1H), 3.66 (s, 3H), 3.41 (dd,  $J = 9.1, 16.6$  Hz, 1H), 3.14 (dd,  $J = 6.8, 16.5$  Hz, 1H);

$^{13}\text{C}\{^1\text{H}\}$  NMR (176 MHz,  $\text{CDCl}_3$ )  $\delta$  172.9, 171.2, 160.6 (d,  $J=248.5$  Hz), 155.6, 149.4, 138.2, 133.3, 129.4 (d,  $J=3.3$  Hz), 129.2 (d,  $J=8.2$  Hz), 126.1 (d,  $J=14.7$  Hz), 125.5, 124.5 (d,  $J=24.5$  Hz), 121.3, 118.2, 115.9 (d,  $J=22.9$  Hz), 51.9, 35.9, 35.2; IR  $\nu_{\text{max}}$ : 3135, 2949, 1733, 1622, 1611, 1566, 1490, 1471, 1434, 1291, 1219, 757  $\text{cm}^{-1}$ ; HRMS (ESI-TOF)  $m/z$ : ( $\text{M} + \text{H}$ ) $^+$  calcd for  $\text{C}_{19}\text{H}_{16}\text{FO}_5$  343.0982; found: 343.0983; mp 117.8–126.2  $^{\circ}\text{C}$ .

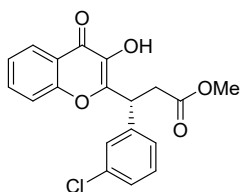

Methyl (*R*)-3-(3-chlorophenyl)-3-(3-hydroxy-4-oxo-4*H*-chromen-2-yl)propanoate (**3ama**). GP4. A scale of 0.25 mmol, opening time was equal to 24 h, solid, 77.73 mg (0.22 mmol), isolated yield of 87%, 82% *ee*;  $^1\text{H NMR}$  (700 MHz,  $\text{CDCl}_3$ )  $\delta$  8.22 (dd,  $J = 1.8, 7.9$  Hz, 1H), 7.69 (ddd,  $J = 1.5, 7.0, 8.6$  Hz, 1H), 7.52 (dd,  $J = 0.4, 8.6$  Hz, 1H), 7.45 (t,  $J = 1.9$  Hz, 1H), 7.41 (ddd,  $J = 1.1, 7.2, 8.0$  Hz, 1H), 7.36 (td,  $J = 1.6, 7.2$  Hz, 1H), 7.28-7.25 (m, 2H), 6.38 (s, 1H), 4.97 (dd,  $J = 7.2, 8.7$  Hz, 1H), 3.67 (s, 3H), 3.36 (dd,  $J = 8.6, 16.5$  Hz, 1H), 3.14 (dd,  $J = 7.3, 16.5$  Hz, 1H);  $^{13}\text{C}\{^1\text{H}\}$  NMR (176 MHz,  $\text{CDCl}_3$ )  $\delta$  172.9, 171.1, 155.5, 149.8, 141.2, 137.9, 134.7, 133.4, 130.1, 128.0, 127.8, 126.1, 125.6, 124.6, 121.4, 118.2, 52.0, 40.7, 36.4; IR  $\nu_{\text{max}}$ :

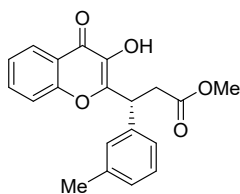

3264, 2951, 1734, 1609, 1570, 1469, 1422, 1290, 756, 698  $\text{cm}^{-1}$ ; HRMS (ESI-TOF)  $m/z$ :  $(M + H)^+$  calcd for  $\text{C}_{19}\text{H}_{16}^{35}\text{ClO}_5$  359.0686; found: 359.0687; mp 109.5–113.1  $^{\circ}\text{C}$ .

Methyl (*R*)-3-(3-hydroxy-4-oxo-4*H*-chromen-2-yl)-3-(*m*-tolyl)propanoate (**3ana**). GP4. A scale of 0.25 mmol, opening time was equal to 24 h, solid, 82.08 mg (0.24 mmol), isolated yield of 97%, 89% *ee*;  $^1\text{H}$  NMR (700 MHz,  $\text{CDCl}_3$ )  $\delta$  8.21 (dd,  $J = 1.3, 8.1$  Hz, 1H), 7.67 (ddd,  $J = 1.5, 7.0, 8.6$  Hz, 1H), 7.52 (dd,  $J = 0.4, 8.6$  Hz, 1H), 7.40 (ddd,  $J = 1.0, 7.0, 8.0$  Hz, 1H), 7.28–7.21 (m, 3H), 7.09 (d,  $J = 7.0$  Hz, 1H), 6.31 (s, 1H), 4.96 (dd,  $J = 6.8, 9.0$  Hz, 1H), 3.66 (s, 3H), 3.38 (dd,  $J = 9.1, 16.4$  Hz, 1H), 3.13 (dd,  $J = 6.8, 16.5$  Hz, 1H), 2.35 (s, 3H);  $^{13}\text{C}\{^1\text{H}\}$  NMR (176 MHz,  $\text{CDCl}_3$ )  $\delta$  172.8, 171.5, 155.6, 150.5, 139.2, 138.5, 137.8, 133.2, 128.7, 128.6, 128.3, 125.5, 124.7, 124.5, 121.3, 118.2, 51.8, 41.1, 36.6, 21.4; IR  $\nu_{\text{max}}$ : 3277, 2948, 1732, 1624, 1612, 1575, 1469, 1439, 1426, 1290, 1250, 1229, 717  $\text{cm}^{-1}$ ; HRMS (ESI-TOF)  $m/z$ :  $(M + H)^+$  calcd for  $\text{C}_{20}\text{H}_{19}\text{O}_5$  339.1232; found: 339.1233; mp 97.6–104.8  $^{\circ}\text{C}$ .

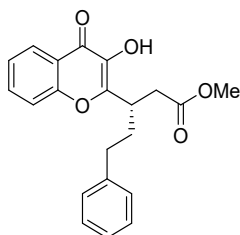

Methyl (*S*)-3-(3-hydroxy-4-oxo-4*H*-chromen-2-yl)-5-phenylpentanoate (**3aoa**). GP4. A scale of 0.25 mmol, opening time was equal to 24 h, oil, 80.76 mg (0.23 mmol), isolated yield of 92%, 95% *ee*;  $^1\text{H}$  NMR (700 MHz,  $\text{CDCl}_3$ )  $\delta$  8.24 (ddd,  $J = 0.4, 1.8, 7.9$  Hz, 1H), 7.69 (ddd,  $J = 1.8, 7.0, 8.6$  Hz, 1H), 7.49 (ddd,  $J = 0.4, 1.1, 8.6$  Hz, 1H), 7.42 (ddd,  $J = 1.0, 7.0, 8.0$  Hz, 1H), 7.24–7.21 (m, 2H), 7.17–7.11 (m, 3H), 6.29 (s, 1H), 3.79–3.74 (m, 1H), 3.65 (s, 3H), 2.91 (dd,  $J = 8.1, 15.8$  Hz, 1H), 2.76 (dd,  $J = 6.7, 16.0$  Hz, 1H), 2.69 (ddd,  $J = 6.4, 9.6, 13.9$  Hz, 1H),

2.62 (ddd,  $J = 5.7, 9.7, 14.1$  Hz, 1H), 2.23 (dtd,  $J = 5.9, 9.8, 13.6$  Hz, 1H), 2.06 (dddd,  $J = 5.1, 6.6, 9.9, 13.6$  Hz, 1H);  $^{13}\text{C}\{^1\text{H}\}$  NMR (176 MHz,  $\text{CDCl}_3$ )  $\delta$  172.6, 171.8, 155.6, 151.7, 141.1, 138.6, 133.2, 128.3, 128.3, 126.0, 125.5, 124.5, 121.4, 118.1, 51.8, 36.9, 35.9, 33.8, 33.6; IR  $\nu_{\text{max}}$ : 3267, 2949, 1736, 1610, 1571, 1469, 1433, 1286, 1214, 751, 702  $\text{cm}^{-1}$ ; HRMS (ESI-TOF)  $m/z$ :  $(M + H)^+$  calcd for  $\text{C}_{21}\text{H}_{21}\text{O}_5$  353.1389; found: 353.1388.

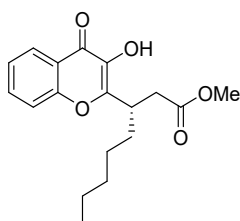

Methyl (*S*)-3-(3-hydroxy-4-oxo-4*H*-chromen-2-yl)octanoate (**3apa**). GP4. A scale of 0.25 mmol, opening time was equal to 24 h, oil, 18.60 mg (0.06 mmol), isolated yield of 23%, 96% *ee*;  $^1\text{H}$  NMR (700 MHz,  $\text{CDCl}_3$ )  $\delta$  8.24 (ddd,  $J = 0.4, 1.8, 7.9$  Hz, 1H), 7.68 (ddd,  $J = 1.7, 7.0, 8.5$  Hz, 1H), 7.50 (dd,  $J = 0.4, 8.6$  Hz, 1H), 7.41 (ddd,  $J = 1.0, 7.0, 8.0$  Hz, 1H), 6.21 (s, 1H), 3.71 (dddd,  $J = 5.5, 6.4, 8.5, 9.5$  Hz, 1H), 3.66 (s, 3H), 2.88 (dd,  $J = 8.5, 16.0$  Hz, 1H), 2.73 (dd,  $J = 6.4, 15.8$  Hz, 1H),

1.88–1.81 (m, 1H), 1.74–1.68 (m, 1H), 1.36–1.26 (m, 6H), 0.86 (t,  $J = 7.2$  Hz, 3H);  $^{13}\text{C}\{^1\text{H}\}$  NMR (176 MHz,  $\text{CDCl}_3$ )  $\delta$  172.6, 172.0, 155.6, 152.1, 138.5, 133.1, 125.5, 124.4, 121.3, 118.1, 51.7, 36.8, 35.9, 32.3, 31.5, 26.7, 22.4, 13.9; IR  $\nu_{\text{max}}$ : 3297, 2949, 1737, 1624, 1612, 1574, 1469, 1427, 1296, 1226, 751, 703  $\text{cm}^{-1}$ ; HRMS (ESI-TOF)  $m/z$ :  $(M + H)^+$  calcd for  $\text{C}_{18}\text{H}_{23}\text{O}_5$  319.1545; found: 319.1545.

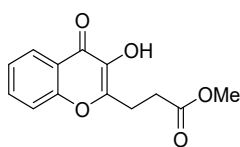

Methyl 3-(3-hydroxy-4-oxo-4*H*-chromen-2-yl)propanoate (**3aqa**). GP4. A scale of 0.25 mmol, opening time was equal to 24 h, solid, 37.24 mg (0.15 mmol), isolated yield of 60%;  $^1\text{H}$  NMR (700 MHz,  $\text{CDCl}_3$ )  $\delta$  8.24 (ddd,  $J = 0.4, 1.8, 7.9$  Hz, 1H), 7.68 (ddd,  $J = 1.8, 7.0, 8.6$  Hz, 1H), 7.48 (ddd,  $J = 0.4, 1.1, 8.6$  Hz, 1H), 7.41 (ddd,  $J = 1.0, 7.0, 8.0$  Hz, 1H), 6.26 (s, 1H), 3.74 (s, 3H), 3.22 (t,  $J = 7.5$  Hz, 2H), 2.84 (t,  $J = 7.7$  Hz, 2H);  $^{13}\text{C}\{^1\text{H}\}$  NMR (176 MHz,  $\text{CDCl}_3$ )  $\delta$  172.5, 172.4, 155.6, 149.7, 138.4, 133.1, 125.5, 124.4, 121.5, 118.1, 51.8, 30.6, 24.5; IR  $\nu_{\text{max}}$ : 3278, 2951, 1731, 1603, 1563, 1484, 1467, 1422, 1287, 753, 695  $\text{cm}^{-1}$ ; HRMS (ESI-TOF)  $m/z$ :  $(M + H)^+$  calcd for  $\text{C}_{13}\text{H}_{13}\text{O}_5$  249.0763; found: 249.0760; mp 98.6–106.7  $^{\circ}\text{C}$ .

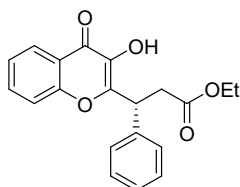

Ethyl (*R*)-3-(3-hydroxy-4-oxo-4*H*-chromen-2-yl)-3-phenylpropanoate (**3aab**). GP4. A scale of 0.25 mmol, opening time was equal to 72 h, oil, 74.24 mg

(0.22 mmol), isolated yield of 88%, 83% *ee*;  $^1\text{H}$  NMR (700 MHz,  $\text{CDCl}_3$ )  $\delta$  8.21 (ddd,  $J = 0.4, 1.8, 8.1$  Hz, 1H), 7.67 (ddd,  $J = 1.8, 7.0, 8.6$  Hz, 1H), 7.52 (ddd,  $J = 0.4, 1.1, 8.6$  Hz, 1H), 7.49-7.46 (m, 2H), 7.41-7.38 (m, 1H), 7.37-7.33 (m, 2H), 7.28-7.26 (m, 1H), 6.33 (s, 1H), 5.00 (dd,  $J = 7.0, 9.0$  Hz, 1H), 4.10 (q,  $J = 7.2$  Hz, 2H), 3.37 (dd,  $J = 9.1, 16.2$  Hz, 1H), 3.14 (dd,  $J = 6.9, 16.2$  Hz, 1H), 1.16 (t,  $J = 7.2$  Hz, 3H);  $^{13}\text{C}\{^1\text{H}\}$  NMR (176 MHz,  $\text{CDCl}_3$ )  $\delta$  172.8, 170.9, 155.5, 150.6, 139.3, 137.8, 133.2, 128.8, 127.8, 127.5, 125.5, 124.5, 121.3, 118.1, 60.7, 41.1, 36.9, 14.0; IR  $\nu_{\text{max}}$ : 3278, 2981, 1731, 1610, 1569, 1468, 1422, 1290, 1230, 755, 698  $\text{cm}^{-1}$ ; HRMS (ESI-TOF)  $m/z$ : (M + H) $^+$  calcd for  $\text{C}_{20}\text{H}_{19}\text{O}_5$  339.1232; found: 339.1234.

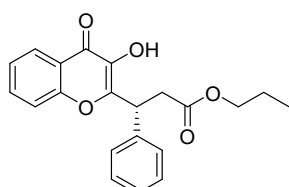

Propyl (*R*)-3-(3-hydroxy-4-oxo-4*H*-chromen-2-yl)-3-phenylpropanoate (**3aac**). GP4. A scale of 0.25 mmol, opening time was equal to 72 h, oil, 59.95 mg (0.17 mmol), isolated yield of 68%, 82% *ee*;  $^1\text{H}$  NMR (700 MHz,  $\text{CDCl}_3$ )  $\delta$  8.21 (dd,  $J = 1.3, 7.9$  Hz, 1H), 7.67 (ddd,  $J = 1.8, 7.0, 8.6$  Hz, 1H), 7.52 (d,  $J = 8.1$  Hz, 1H), 7.48 (dd,  $J = 1.1, 8.1$  Hz, 2H), 7.40 (ddd,  $J = 1.0, 7.0, 8.0$  Hz, 1H), 7.37-7.33 (m, 2H), 7.28-7.26 (m, 1H), 6.33 (s, 1H), 5.00 (dd,  $J = 6.9, 9.1$  Hz, 1H), 4.00 (t,  $J = 6.6$  Hz, 2H), 3.39 (dd,  $J = 9.2, 16.3$  Hz, 1H), 3.16 (dd,  $J = 6.9, 16.2$  Hz, 1H), 1.56 (sxt,  $J = 7.1$  Hz, 2H), 0.85 (t,  $J = 7.5$  Hz, 3H);  $^{13}\text{C}\{^1\text{H}\}$  NMR (75 MHz,  $\text{CDCl}_3$ )  $\delta$  172.9, 171.1, 155.4, 150.8, 139.3, 137.8, 133.2, 128.8, 127.8, 127.5, 125.5, 124.5, 121.3, 118.1, 66.4, 41.0, 36.9, 21.8, 10.2; IR  $\nu_{\text{max}}$ : 3289, 2966, 1731, 1610, 1569, 1468, 1422, 1289, 1229, 756, 698  $\text{cm}^{-1}$ ; HRMS (ESI-TOF)  $m/z$ : (M + H) $^+$  calcd for  $\text{C}_{21}\text{H}_{21}\text{O}_5$  353.1389; found: 353.1389.

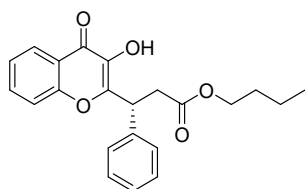

Butyl (*R*)-3-(3-hydroxy-4-oxo-4*H*-chromen-2-yl)-3-phenylpropanoate (**3aad**). GP4. A scale of 0.25 mmol, opening time was equal to 72 h, oil, 79.32 mg (0.22 mmol), isolated yield of 87%, 84% *ee*;  $^1\text{H}$  NMR (700 MHz,  $\text{CDCl}_3$ )  $\delta$  8.22 (ddd,  $J = 0.4, 1.8, 7.9$  Hz, 1H), 7.67 (ddd,  $J = 1.8, 7.0, 8.6$  Hz, 1H), 7.52 (dd,  $J = 0.4, 8.6$  Hz, 1H), 7.48 (dd,  $J = 0.9, 8.1$  Hz, 2H), 7.40 (ddd,  $J = 1.0, 7.0, 8.0$  Hz, 1H), 7.36-7.33 (m, 2H), 7.28-7.26 (m, 1H), 6.43 (s, 1H), 5.01 (dd,  $J = 7.0, 9.0$  Hz, 1H), 4.05 (t,  $J = 6.6$  Hz, 2H), 3.38 (dd,  $J = 9.2, 16.3$  Hz, 1H), 3.15 (dd,  $J = 7.0, 16.3$  Hz, 1H), 1.53-1.47 (m, 2H), 1.26 (qd,  $J = 7.4, 15.1$  Hz, 2H), 0.84 (t,  $J = 7.5$  Hz, 3H);  $^{13}\text{C}\{^1\text{H}\}$  NMR (75 MHz,  $\text{CDCl}_3$ )  $\delta$  172.8, 171.0, 155.5, 150.8, 139.2, 137.8, 133.2, 128.8, 127.8, 127.5, 125.5, 124.5, 121.3, 118.1, 64.7, 41.0, 36.9, 30.5, 19.0, 13.6; IR  $\nu_{\text{max}}$ : 3285, 2959, 1731, 1611, 1568, 1469, 1422, 1290, 1230, 756, 698  $\text{cm}^{-1}$ ; HRMS (ESI-TOF)  $m/z$ : (M + H) $^+$  calcd for  $\text{C}_{22}\text{H}_{23}\text{O}_5$  367.1545; found: 367.1547.

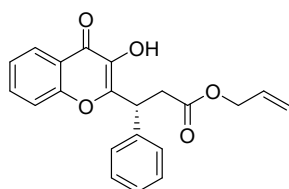

Allyl (*R*)-3-(3-hydroxy-4-oxo-4*H*-chromen-2-yl)-3-phenylpropanoate (**3aae**). GP4. A scale of 0.25 mmol, opening time was equal to 72 h, oil, 51.96 mg (0.15 mmol), isolated yield of 59%, 90% *ee*;  $^1\text{H}$  NMR (700 MHz,  $\text{CDCl}_3$ )  $\delta$  8.18 (dd,  $J = 1.7, 8.0$  Hz, 1H), 7.64 (ddd,  $J = 1.7, 7.0, 8.7$  Hz, 1H), 7.51-7.47 (m, 1H), 7.46-7.43 (m, 2H), 7.37 (ddd,  $J = 1.1, 7.0, 8.0$  Hz, 1H), 7.34-7.30 (m, 2H), 7.25-7.23 (m, 1H), 6.29 (s, 1H), 5.78 (tdd,  $J = 5.8, 10.4, 17.2$  Hz, 1H), 5.20 (qd,  $J = 1.5, 17.2$  Hz, 1H), 5.14 (qd,  $J = 1.3, 10.4$  Hz, 1H), 4.98 (dd,  $J = 7.0, 9.1$  Hz, 1H), 4.52 (td,  $J = 1.4, 5.8$  Hz, 2H), 3.39 (dd,  $J = 9.2, 16.3$  Hz, 1H), 3.15 (dd,  $J = 6.9, 16.3$  Hz, 1H);  $^{13}\text{C}\{^1\text{H}\}$  NMR (75 MHz,  $\text{CDCl}_3$ )  $\delta$  172.8, 170.6, 155.5, 150.4, 139.1, 137.7, 133.2, 131.7, 128.8, 127.8, 127.6, 125.5, 124.5, 121.2, 118.4, 118.2, 65.4, 41.0, 36.8; IR  $\nu_{\text{max}}$ : 3282, 3064, 1733, 1610, 1569, 1482, 1469, 1422, 1290, 1229, 757, 698  $\text{cm}^{-1}$ ; HRMS (ESI-TOF)  $m/z$ : (M + H) $^+$  calcd for  $\text{C}_{21}\text{H}_{19}\text{O}_5$  351.1232; found: 351.1231.

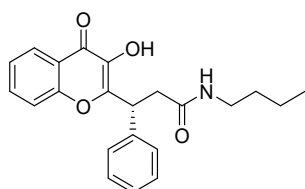

(*R*)-*N*-Butyl-3-(3-hydroxy-4-oxo-4*H*-chromen-2-yl)-3-phenylpropanamide (**3aaf**). GP4. A scale of 0.25 mmol, opening time was equal to 24 h, solid,



63.46 mg (0.17 mmol), isolated yield of 69%, 87% *ee*;  $^1\text{H NMR}$  (700 MHz,  $\text{CDCl}_3$ )  $\delta$  8.17 (dd,  $J = 1.3, 8.0$  Hz, 1H), 7.63 (ddd,  $J = 1.7, 7.0, 8.5$  Hz, 1H), 7.47 (d,  $J = 8.0$  Hz, 1H), 7.45-7.43 (m, 2H), 7.35 (ddd,  $J = 1.0, 7.1, 8.1$  Hz, 1H), 7.33-7.29 (m, 2H), 7.25-7.22 (m, 1H), 5.62 (s, 1H), 4.94 (dd,  $J = 7.0, 9.1$  Hz, 1H), 3.23 (dd,  $J = 9.1, 14.7$  Hz, 1H), 3.18-3.11 (m, 2H), 2.95 (dd,  $J = 7.0, 14.7$  Hz, 1H), 1.32-1.26 (m, 2H), 1.14 (qd,  $J = 7.4, 15.0$  Hz, 2H), 0.77 (t,  $J = 7.3$  Hz, 3H);  $^{13}\text{C}\{^1\text{H}\}$  NMR (176 MHz,  $\text{CDCl}_3$ )  $\delta$  172.9, 170.0, 155.6, 151.2, 139.7, 137.9, 133.2, 128.8, 127.9, 127.5, 125.5, 124.5, 121.3, 118.1, 42.3, 39.4, 39.3, 31.5, 19.8, 13.5; IR  $\nu_{\text{max}}$ : 3301, 2960, 2927, 1622, 1610, 1545, 1469, 1423, 1291, 1277, 1236, 752, 696  $\text{cm}^{-1}$ ; HRMS (ESI-TOF)  $m/z$ : (M + H) $^+$  calcd for  $\text{C}_{22}\text{H}_{24}\text{NO}_4$  366.1705; found: 366.1705; mp 154.1–163.4  $^\circ\text{C}$ .

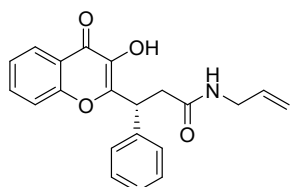

(*R*)-*N*-Allyl-3-(3-hydroxy-4-oxo-4*H*-chromen-2-yl)-3-phenylpropanamide

**(3aag)**. GP4. A scale of 0.25 mmol, opening time was equal to 24 h, solid,

86.56 mg (0.25 mmol), isolated yield of 99%, 91% *ee*;  $^1\text{H NMR}$  (700 MHz,  $\text{CDCl}_3$ )  $\delta$  8.21 (dd,  $J = 1.5, 7.9$  Hz, 1H), 7.67 (ddd,  $J = 1.7, 7.1, 8.6$  Hz, 1H), 7.50 (d,  $J = 8.6$  Hz, 1H), 7.48 (dd,  $J = 1.0, 8.3$  Hz, 2H), 7.40 (ddd,  $J = 1.0, 7.1, 8.0$  Hz, 1H), 7.37-7.33 (m, 2H), 7.28-7.27 (m, 1H), 6.38 (s, 1H), 5.69 (tdd,  $J = 5.7, 10.3, 17.1$  Hz, 1H), 5.62 (s, 1H), 5.04-5.01 (m, 1H), 5.00-4.97 (m, 1H), 3.82 (tt,  $J = 1.5, 5.7$  Hz, 2H), 3.30 (dd,  $J = 9.0, 15.0$  Hz, 1H), 3.00 (dd,  $J = 6.9, 14.9$  Hz, 1H);  $^{13}\text{C}\{^1\text{H}\}$  NMR (176 MHz,  $\text{CDCl}_3$ )  $\delta$  172.9, 169.9, 155.5, 150.9, 139.6, 137.8, 133.8, 133.2, 128.9, 127.8, 127.5, 125.5, 124.5, 121.2, 118.2, 116.3, 42.2, 41.9, 39.2; IR  $\nu_{\text{max}}$ : 3280, 3065, 2919, 1632, 1609, 1538, 1469, 1421, 1293, 1235, 1221, 750, 697  $\text{cm}^{-1}$ ; HRMS (ESI-TOF)  $m/z$ : (M + H) $^+$  calcd for  $\text{C}_{21}\text{H}_{20}\text{NO}_4$  350.1392; found: 350.1393; mp 170.1–177.6  $^\circ\text{C}$ .

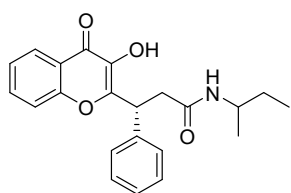

(*3R*)-*N*-(*sec*-Butyl)-3-(3-hydroxy-4-oxo-4*H*-chromen-2-yl)-3-phenylpropan-

amide **(3aah)**. GP4. A scale of 0.25 mmol, opening time was equal to 24 h,

solid, 83.99 mg (0.23 mmol), isolated yield of 92%, 92% *ee*, *dr* 1:1;  $^1\text{H NMR}$  (700 MHz,  $\text{CDCl}_3$ )  $\delta$  8.19-8.15 (m, 1H), 7.63 (qt,  $J = 0.9, 7.8$  Hz, 1H), 7.49-7.43 (m, 3H), 7.36 (tdd,  $J = 0.9, 7.1, 8.0$  Hz, 1H), 7.33-7.28 (m, 2H), 7.25-7.22 (m, 1H), 6.40 (s, 1H), 5.33 (s, 1H), 4.93 (ddd,  $J = 2.8, 7.4, 8.8$  Hz, 1H), 3.83-3.78 (m, 1H), 3.20 (td,  $J = 8.8, 14.5$  Hz, 1H), 2.93 (ddd,  $J = 5.5, 7.2, 14.6$  Hz, 1H), 1.32-1.24 (m, 2H), 0.94 (dd,  $J = 6.6, 10.3$  Hz, 3H), 0.70 (td,  $J = 7.5, 9.2$  Hz, 3H);  $^{13}\text{C}\{^1\text{H}\}$  NMR (176 MHz,  $\text{CDCl}_3$ )  $\delta$  172.9, 169.3, 169.3, 155.6, 150.9, 150.9, 139.7, 139.6, 137.9, 133.2, 128.9, 127.9, 127.5, 125.5, 124.5, 121.2, 118.1, 46.6, 42.5, 42.5, 39.7, 39.7, 29.5, 29.5, 20.2, 20.2, 10.0; IR  $\nu_{\text{max}}$ : 3301, 2963, 2929, 1633, 1621, 1612, 1568, 1548, 1470, 1425, 1275, 1238, 751, 696  $\text{cm}^{-1}$ ; HRMS (ESI-TOF)  $m/z$ : (M + H) $^+$  calcd for  $\text{C}_{22}\text{H}_{24}\text{NO}_4$  366.1705; found: 366.1704; mp 183.8–191.3  $^\circ\text{C}$ .

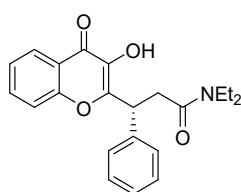

(*R*)-*N,N*-Diethyl-3-(3-hydroxy-4-oxo-4*H*-chromen-2-yl)-3-phenylpropanamide

**(3aai)**. GP4. A scale of 0.25 mmol, opening time was equal to 72 h, oil, 44.89 mg

(0.12 mmol), isolated yield of 49%, 66% *ee*;  $^1\text{H NMR}$  (700 MHz,  $\text{CDCl}_3$ )  $\delta$  8.20 (dd,  $J = 1.5, 7.9$  Hz, 1H), 7.64 (ddd,  $J = 1.8, 7.0, 8.6$  Hz, 1H), 7.51-7.45 (m, 3H), 7.39-7.32 (m, 3H), 7.28-7.25 (m, 1H), 6.47 (s, 1H), 5.06 (dd,  $J = 5.4, 10.0$  Hz, 1H), 3.51 (dd,  $J = 10.1, 16.1$  Hz, 1H), 3.42-3.34 (m, 3H), 3.30 (qd,  $J = 7.0, 13.8$  Hz, 1H), 3.00 (dd,  $J = 5.5, 16.1$  Hz, 1H), 1.23 (t,  $J = 7.2$  Hz, 3H), 1.04 (t,  $J = 7.2$  Hz, 3H);  $^{13}\text{C}\{^1\text{H}\}$  NMR (75 MHz,  $\text{CDCl}_3$ )  $\delta$  172.8, 169.2, 155.4, 151.9, 140.3, 137.9, 132.9, 128.8, 127.9, 127.3, 125.5, 124.4, 121.4, 118.1, 42.2, 41.9, 40.3, 36.1, 14.3, 12.9; IR  $\nu_{\text{max}}$ : 3281, 2974, 2931, 1609, 1568, 1481, 1467, 1426, 1289, 1265, 755, 699  $\text{cm}^{-1}$ ; HRMS (ESI-TOF)  $m/z$ : (M + H) $^+$  calcd for  $\text{C}_{22}\text{H}_{24}\text{NO}_4$  366.1705; found: 366.1705.

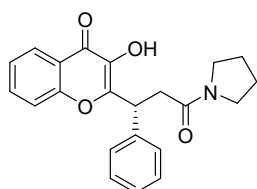

(*R*)-3-Hydroxy-2-(3-oxo-1-phenyl-3-(pyrrolidin-1-yl)propyl)-4*H*-chromen-4-one

**(3aaj)**. GP4. A scale of 0.25 mmol, opening time was equal to 72 h, oil, 60.75 mg (0.17 mmol), isolated yield of 67%, 72% *ee*;  $^1\text{H NMR}$  (700 MHz,  $\text{CDCl}_3$ )

$\delta$  8.18 (ddd,  $J = 0.4, 1.7, 8.2$  Hz, 1H), 7.61 (ddd,  $J = 1.7, 7.0, 8.5$  Hz, 1H), 7.49-7.43 (m, 3H), 7.36-7.28 (m, 3H), 7.25-7.22 (m, 1H), 6.42 (s, 1H), 5.03 (dd,  $J = 5.7, 9.6$  Hz, 1H), 3.50 (s, 1H), 3.45-3.37 (m, 4H), 2.97 (dd,  $J = 5.7, 16.0$  Hz, 1H), 1.92 (s, 2H), 1.81 (s, 2H);  $^{13}\text{C}\{^1\text{H}\}$  NMR (75 MHz,  $\text{CDCl}_3$ )  $\delta$  172.9, 168.7, 155.5, 151.7, 140.3, 137.9, 132.9, 128.8, 127.9, 127.3, 125.5, 124.3, 121.4, 118.1, 46.6, 45.7, 41.8, 37.5, 26.0, 24.3; IR  $\nu_{\text{max}}$ : 3260, 2927, 2872, 1608, 1567, 1467, 1423, 1288, 757, 698  $\text{cm}^{-1}$ ; HRMS (ESI-TOF)  $m/z$ : (M + H) $^+$  calcd for  $\text{C}_{22}\text{H}_{22}\text{NO}_4$  364.1549; found: 364.1550.

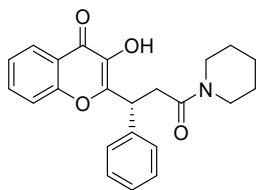

(*R*)-3-Hydroxy-2-(3-oxo-1-phenyl-3-(piperidin-1-yl)propyl)-4*H*-chromen-4-one (**3aak**). GP4. A scale of 0.25 mmol, opening time was equal to 72 h, oil, 46.88 mg (0.12 mmol), isolated yield of 50%, 91% *ee*;  $^1\text{H}$  NMR (700 MHz,  $\text{CDCl}_3$ )  $\delta$  8.18 (ddd,  $J = 0.4, 1.7, 8.0$  Hz, 1H), 7.62 (ddd,  $J = 1.6, 7.0, 8.6$  Hz, 1H), 7.49-7.43 (m, 3H), 7.35 (ddd,  $J = 1.1, 7.0, 8.0$  Hz, 1H), 7.33-7.29 (m, 2H), 7.25-7.22 (m, 1H), 5.00 (dd,  $J = 5.5, 9.8$  Hz, 1H), 3.52-3.42 (m, 5H), 3.01 (dd,  $J = 5.6, 16.1$  Hz, 1H), 1.71-1.58 (m, 6H);  $^{13}\text{C}\{^1\text{H}\}$  NMR (75 MHz,  $\text{CDCl}_3$ )  $\delta$  172.9, 168.4, 155.5, 151.8, 140.3, 137.8, 132.9, 128.8, 127.9, 127.3, 125.5, 124.3, 121.4, 118.1, 46.6, 42.9, 42.1, 36.0, 26.4, 25.5, 24.5; IR  $\nu_{\text{max}}$ : 3271, 2930, 2854, 1608, 1567, 1468, 1441, 1288, 1231, 757, 698  $\text{cm}^{-1}$ ; HRMS (ESI-TOF)  $m/z$ : (M + H) $^+$  calcd for  $\text{C}_{23}\text{H}_{24}\text{NO}_4$  378.1705; found: 378.1705.

### 3. X-Ray Crystallography Data

The diffraction data of the studied compounds were collected at room temperature for the single crystal using Oxford Sapphire CCD diffractometer, MoK $\alpha$  radiation  $\lambda = 0.71073$  Å. The numerical absorption correction was applied.<sup>14</sup> The structure was solved by the direct methods and refined with full-matrix least-squares procedure on F2 (SHELX-97<sup>15</sup>). All heavy atoms were refined with anisotropic displacement parameters. Positions of hydrogen atoms attached to carbon atoms were assigned at calculated positions with thermal displacement parameters fixed to a value of 20% or 50% higher than those of the corresponding carbon atoms, whereas positions of hydrogen atoms from hydroxyl groups were found from difference electron density synthesis. To maintain reasonable geometry and to keep stable refinement process atoms from positionally disordered O44 ester group were refined with constraints (DFIX and EADP). All figures were prepared in DIAMOND<sup>16</sup> and ORTEP-3.<sup>17</sup> The results of

the data collections and refinement have been summarized in Table 1. CCDC 2088560 contain the supplementary crystallographic data for **3daa**. These data can be obtained free of charge from The Cambridge Crystallographic Data Centre *via* [www.ccdc.cam.ac.uk/data\\_request/cif](http://www.ccdc.cam.ac.uk/data_request/cif).

Table 1. Crystal data and structure refinement

| Identification code                         | <b>3daa</b>                                                                           |
|---------------------------------------------|---------------------------------------------------------------------------------------|
| Empirical formula                           | C <sub>19</sub> H <sub>15</sub> O <sub>5</sub> Br                                     |
| Formula weight                              | 403.22                                                                                |
| Temperature [K]                             | 293(2)                                                                                |
| Wavelength [Å]                              | 0.71073                                                                               |
| Crystal system, space group                 | monoclinic, P2 <sub>1</sub>                                                           |
| Unit cell dimensions [Å] and [°]            | a = 17.401(8)    α = 90<br>b = 5.9984(13)    β = 115.06(5)<br>c = 18.889(6)    γ = 90 |
| Volume [Å <sup>3</sup> ]                    | 1786.1(13)                                                                            |
| Z, Calculated density [Mg·m <sup>-3</sup> ] | 4, 1.500                                                                              |
| Absorption coefficient [mm <sup>-1</sup> ]  | 2.327                                                                                 |
| F(000)                                      | 816                                                                                   |
| Crystal size [mm]                           | 0.550 x 0.120 x 0.050                                                                 |
| Theta range for data collection [°]         | 2.095 to 26.372                                                                       |
| Limiting indices                            | -21 ≤ h ≤ 16<br>-7 ≤ k ≤ 7<br>-22 ≤ l ≤ 23                                            |
| Reflections collected/unique                | 11460 / 6739 [R(int) = 0.0431]                                                        |
| Completeness [%] to theta [°]               | 25.242° 99.9 %                                                                        |
| Absorption correction                       | Analytical                                                                            |
| Max. and min. transmission                  | 0.869 and 0.320                                                                       |
| Refinement method                           | Full-matrix least-squares on F <sup>2</sup>                                           |
| Data/restraints/parameters                  | 6739 / 17 / 466                                                                       |
| Goodness-of-fit on F <sup>2</sup>           | 1.004                                                                                 |
| Final R Indices [I > 2σ(I)]                 | R1 <sup>a</sup> = 0.0551, wR2 <sup>b</sup> = 0.1122                                   |
| R indices (all data)                        | R1 <sup>a</sup> = 0.1233, wR2 <sup>b</sup> = 0.1451                                   |
| Absolute structure parameter                | -0.014(13)                                                                            |

|                                                           |                  |
|-----------------------------------------------------------|------------------|
| Largest diff. peak and hole [ $\text{e}\text{\AA}^{-3}$ ] | 0.247 and -0.254 |
|-----------------------------------------------------------|------------------|

$$^a R1 = \frac{\sum ||F_d| - |F_o||}{\sum |F_o|} \quad ^b wR2 = \left[ \frac{\sum w(F_o^2 - F_c^2)^2}{\sum w(F_o^2)^2} \right]^{1/2}$$

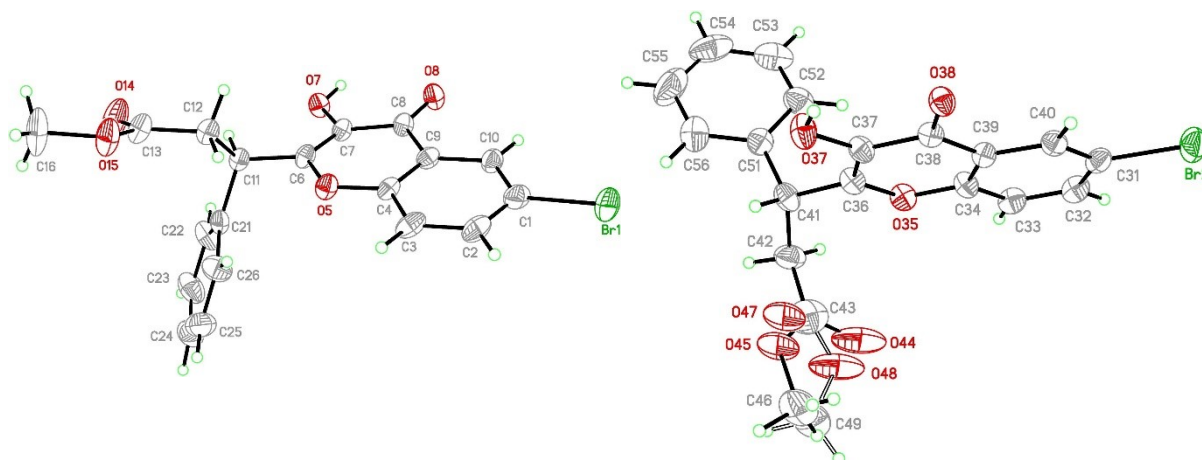

Figure S1. Structure of  $\text{C}_{19}\text{H}_{15}\text{O}_5\text{Br}$  **3daa** with thermal ellipsoids at 20% of probability. There are two crystallographically (both occurring in *R* configuration) independent molecules in the asymmetric unit. O5 molecule is presented to the left and O35 one to the right.

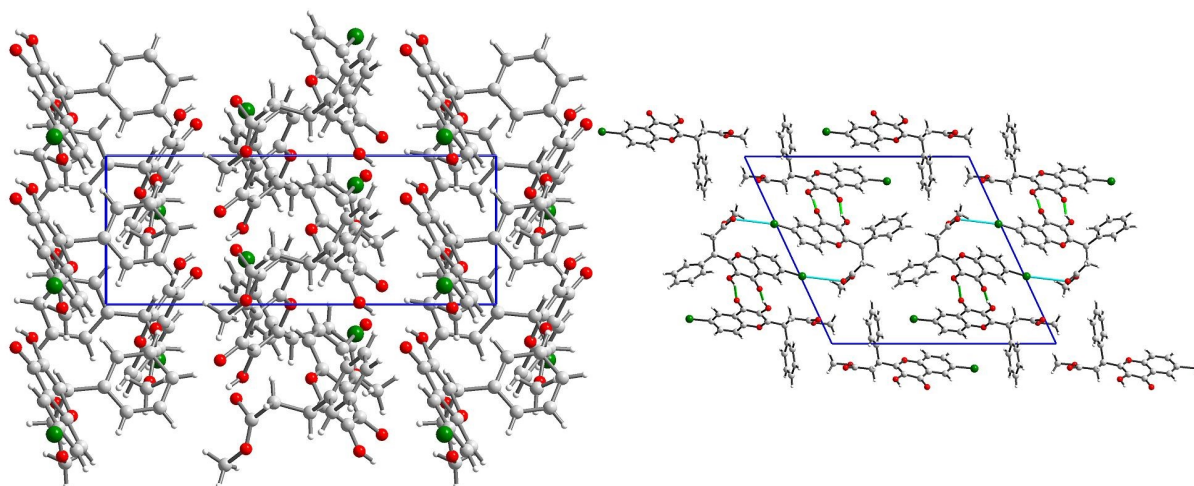

Figure S2. Packing of **3daa** along *c* axis shows *bc* double layers (left) composed solely of O5 or O35 molecules. View along *b* axis show interlayer interactions assured by hydrogen bonds (green, right). However, intralayer interactions differ significantly and weak halogen bond (cyan) occurs only between O35 molecules due to subtle conformational changes in torsion angles around C6-C11 (C36-C41) bonds.

#### 4. NMR Spectra

KDD359.23365.esp

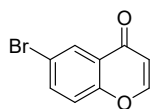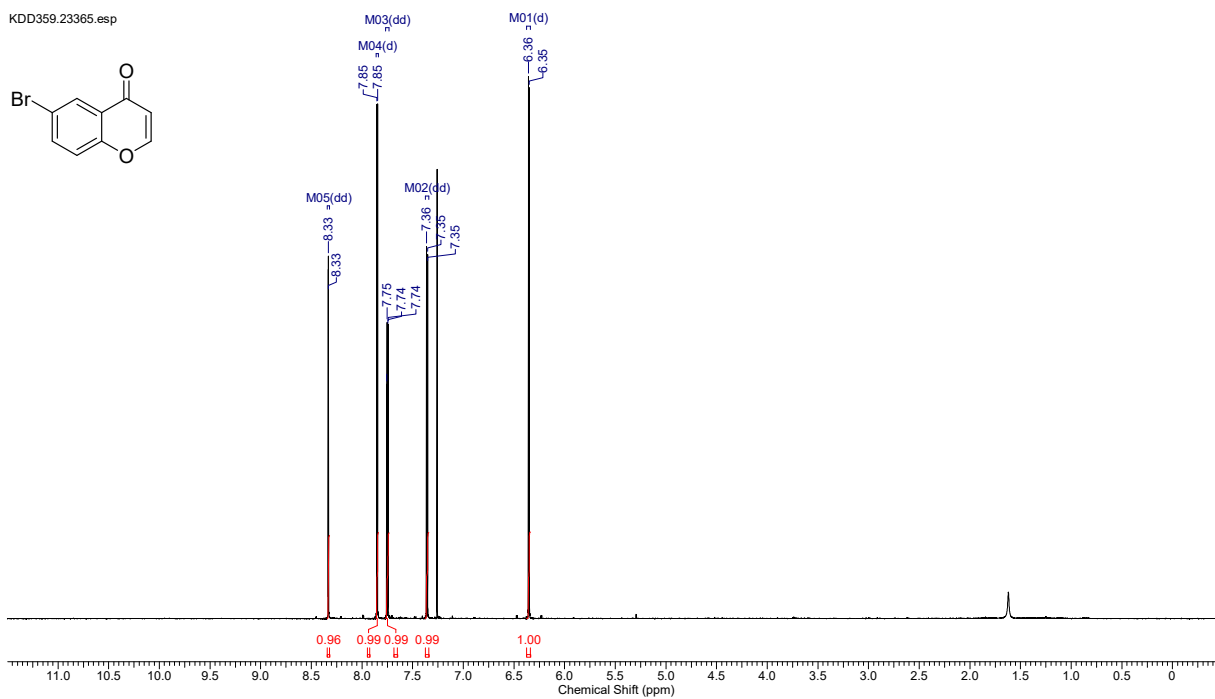

KDD359.2632.esp

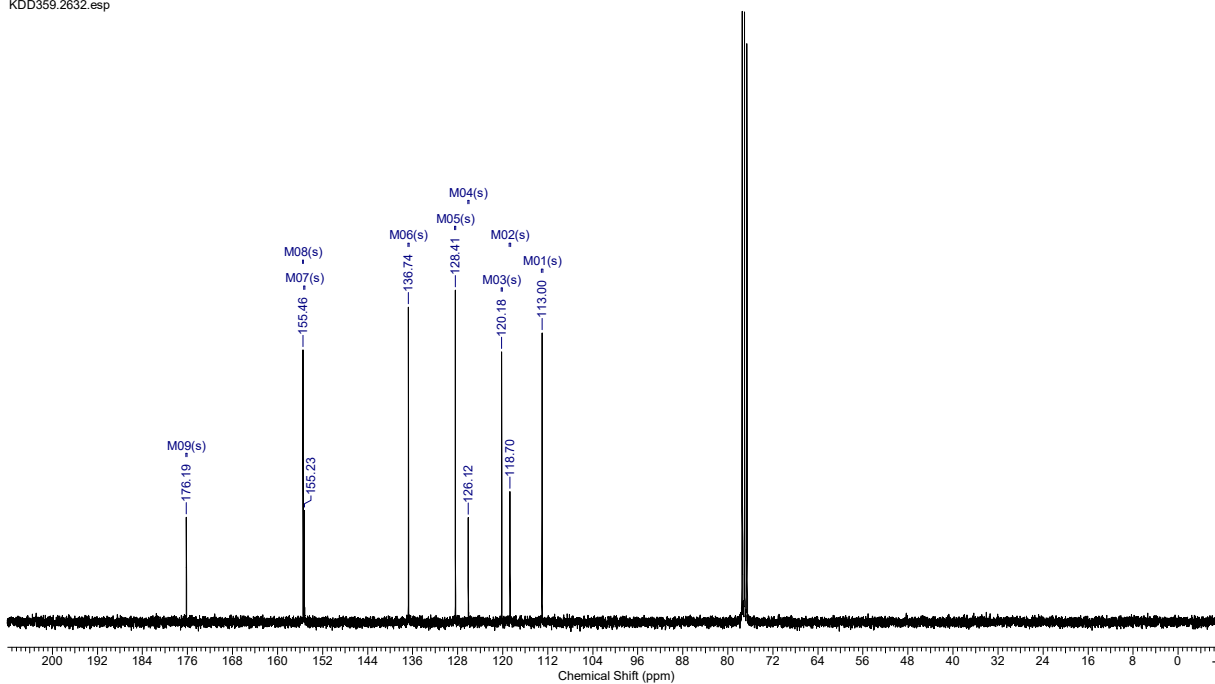

Figure S3.  $^1\text{H}$  and  $^{13}\text{C}$  NMR spectra of **Ob**

KDD364.32034.esp

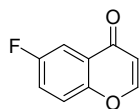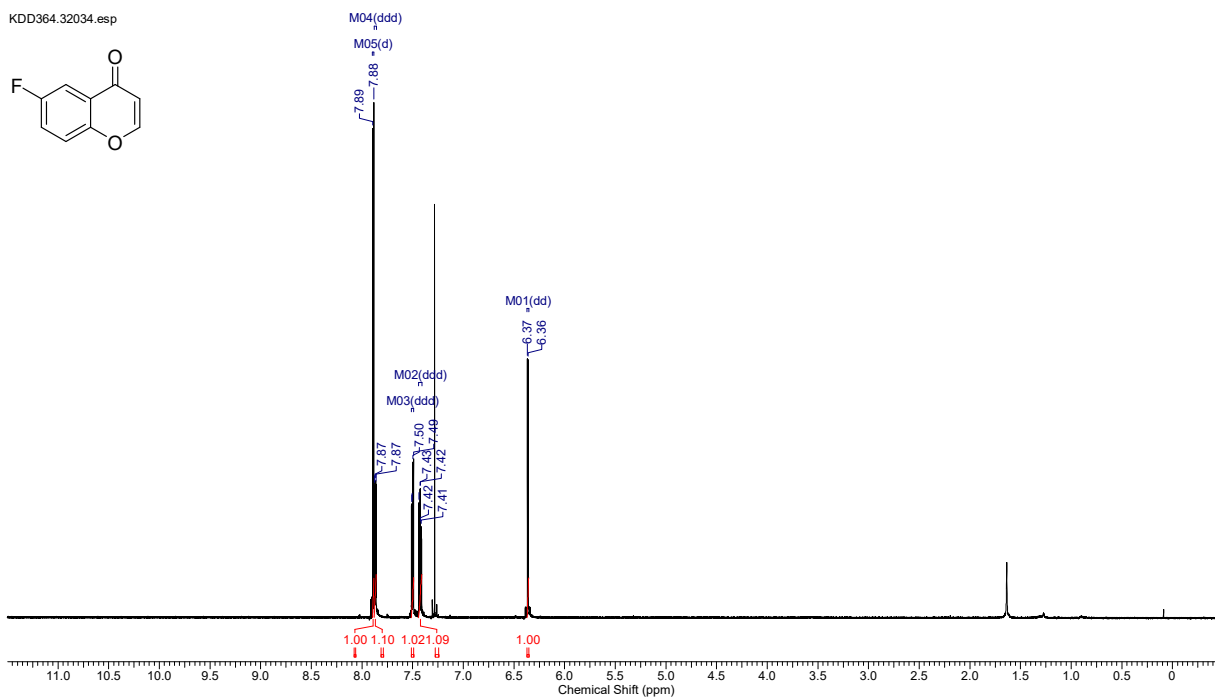

KDD364.2637.esp

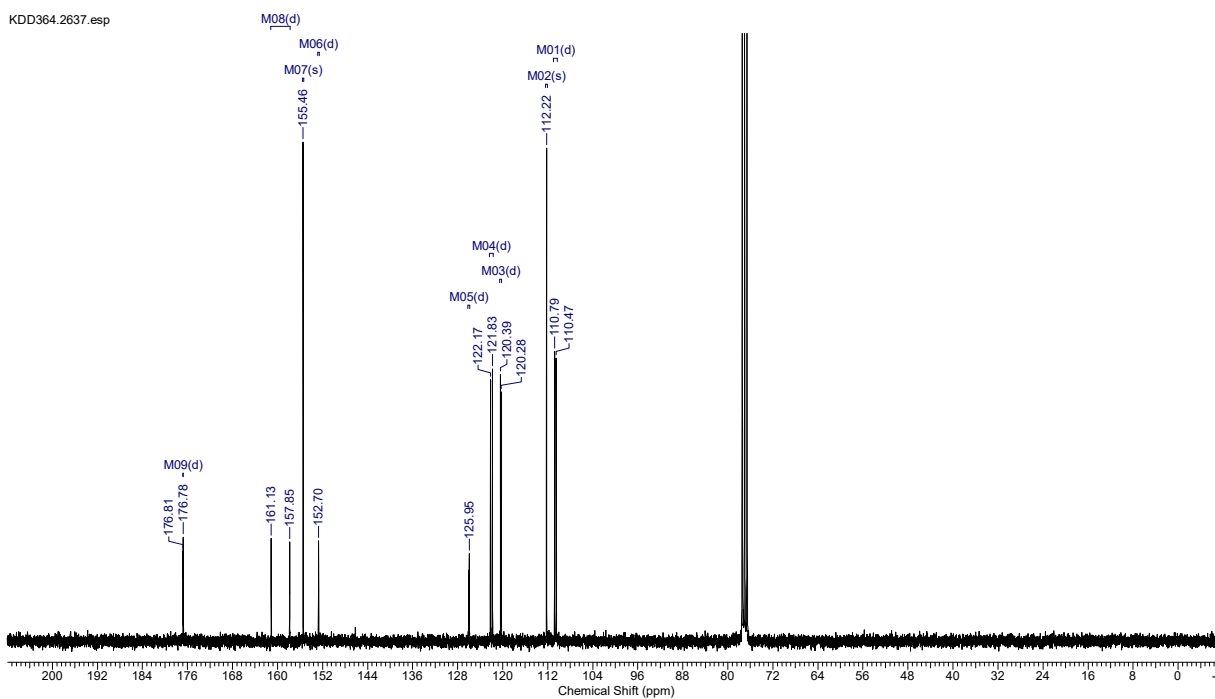

Figure S4. <sup>1</sup>H and <sup>13</sup>C NMR spectra of **0c**

KDD360.23366.esp

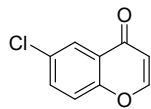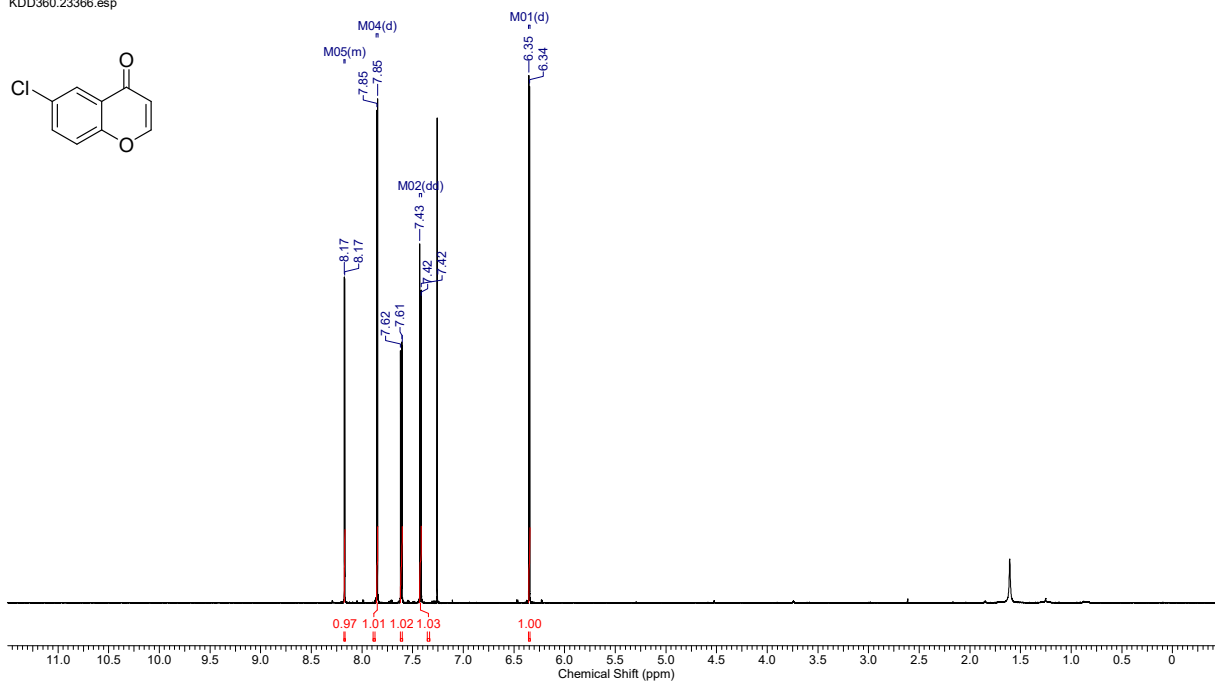

KDD360.2633.esp

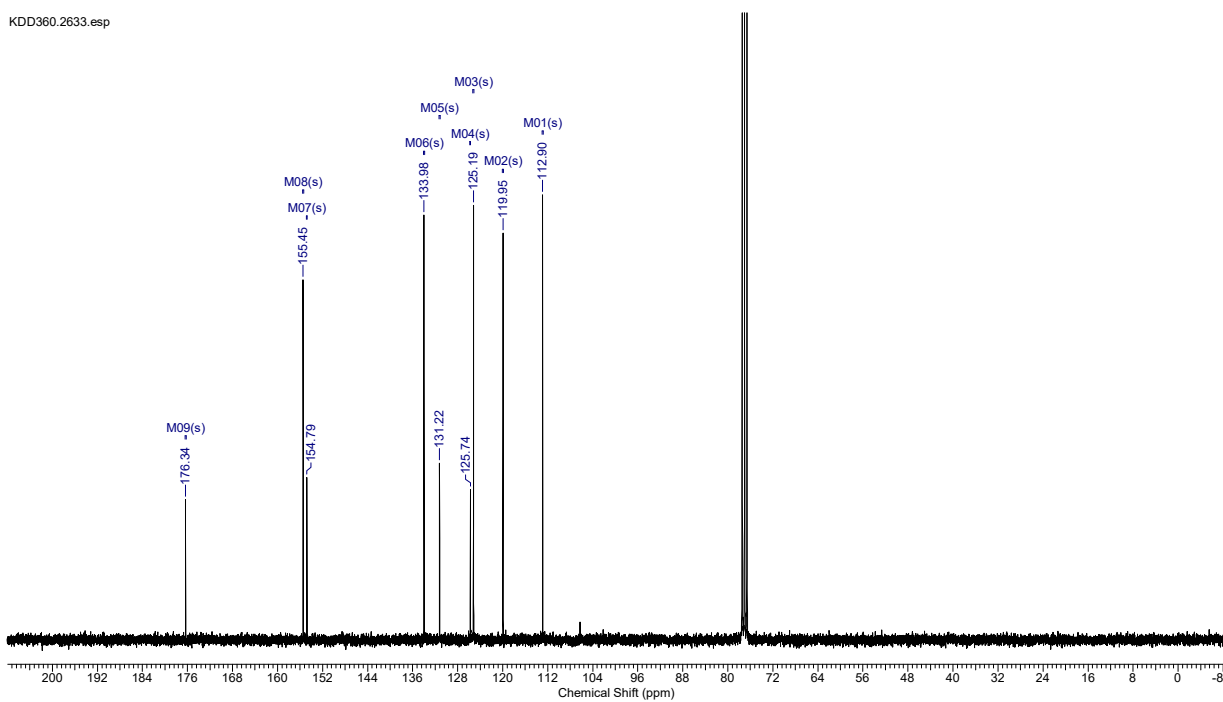

Figure S5. <sup>1</sup>H and <sup>13</sup>C NMR spectra of **Od**

KDD356.23362.esp

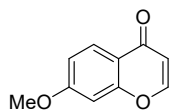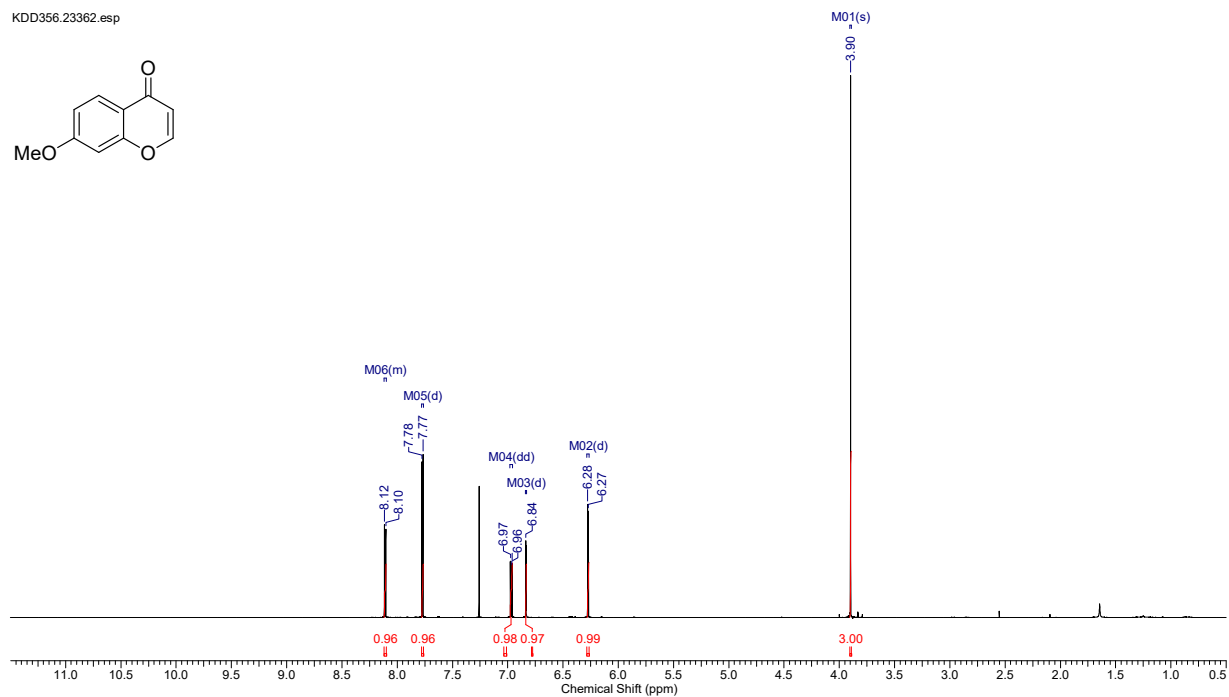

KDD356.2630.esp

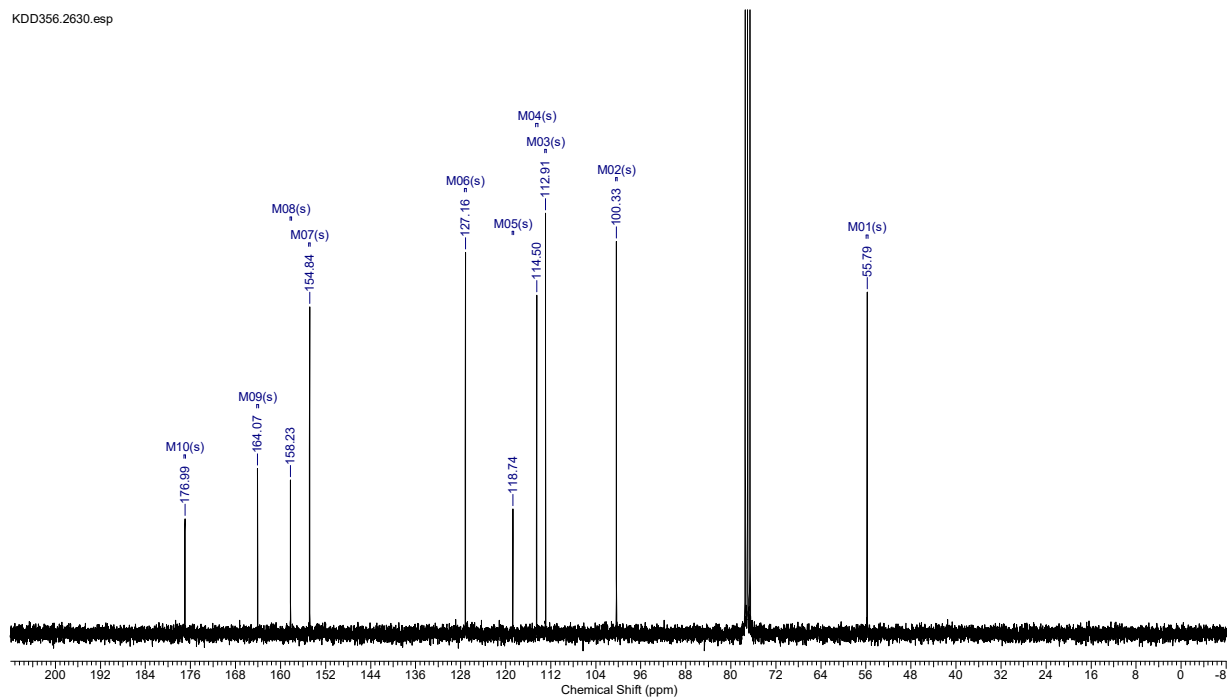

Figure S6.  $^1\text{H}$  and  $^{13}\text{C}$  NMR spectra of **0e**



KDD357.23363.esp

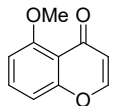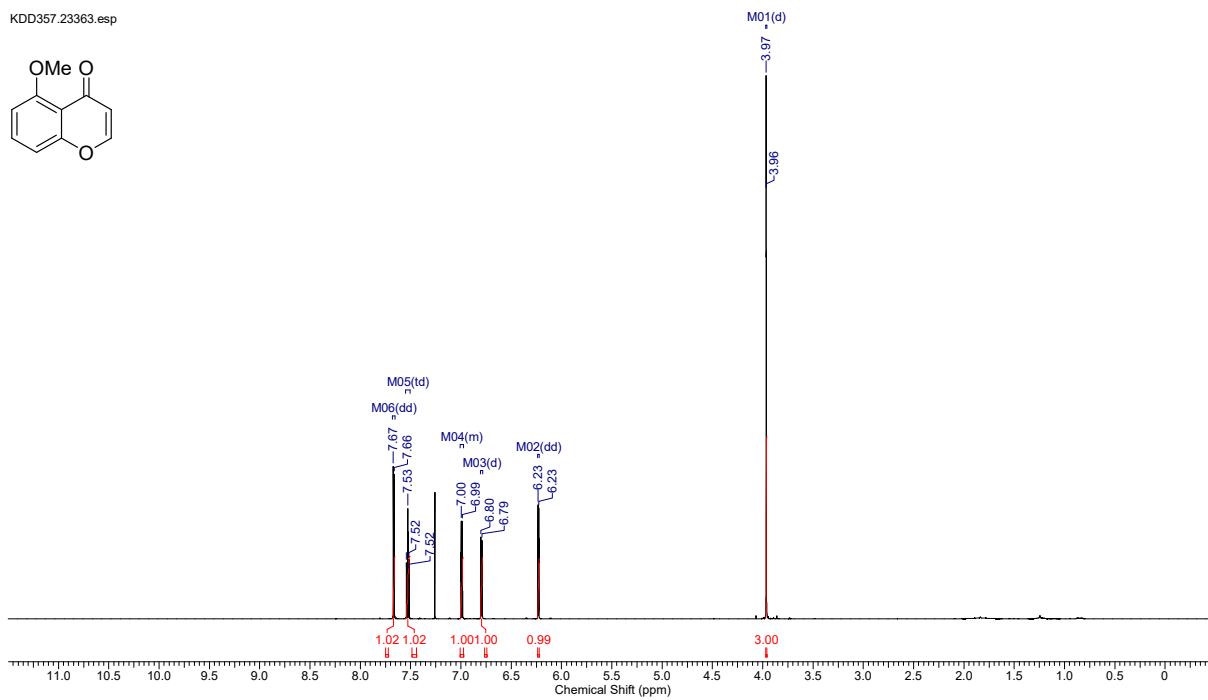

KDD357.2631.esp

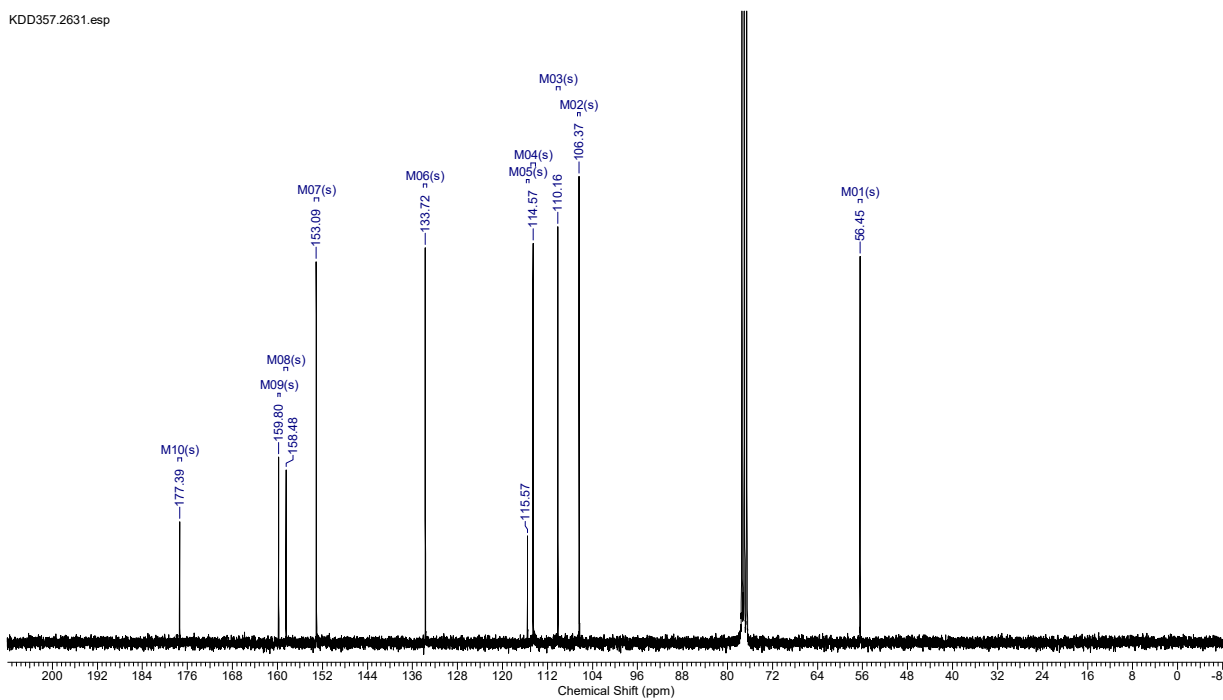

Figure S7. <sup>1</sup>H and <sup>13</sup>C NMR spectra of **Of**

KDD363.23441.esp

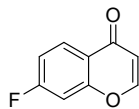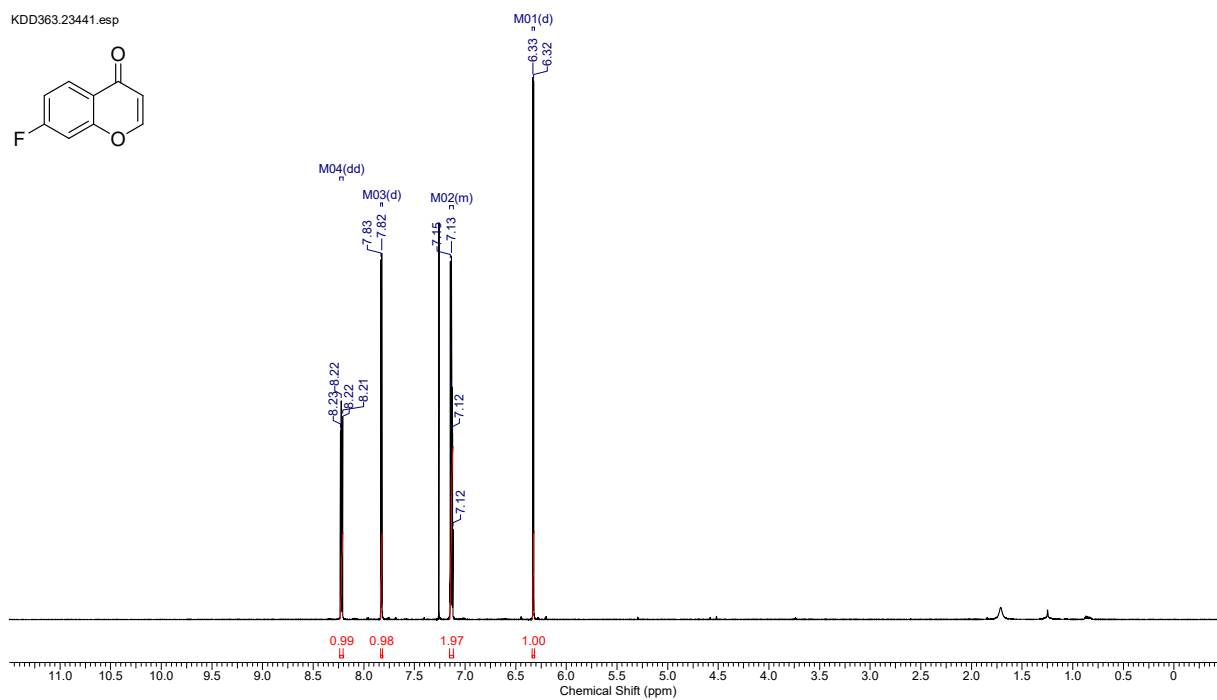

KDD363.2635.esp

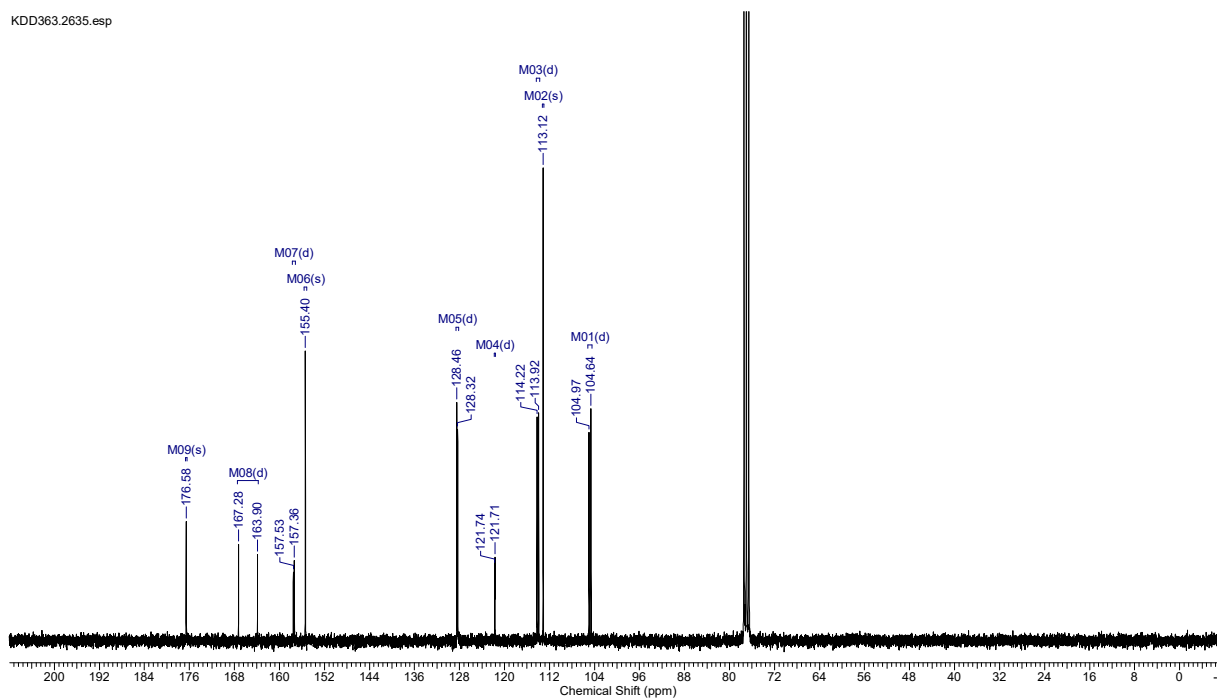

Figure S8. <sup>1</sup>H and <sup>13</sup>C NMR spectra of **0g**

KDD361.23389.esp

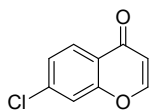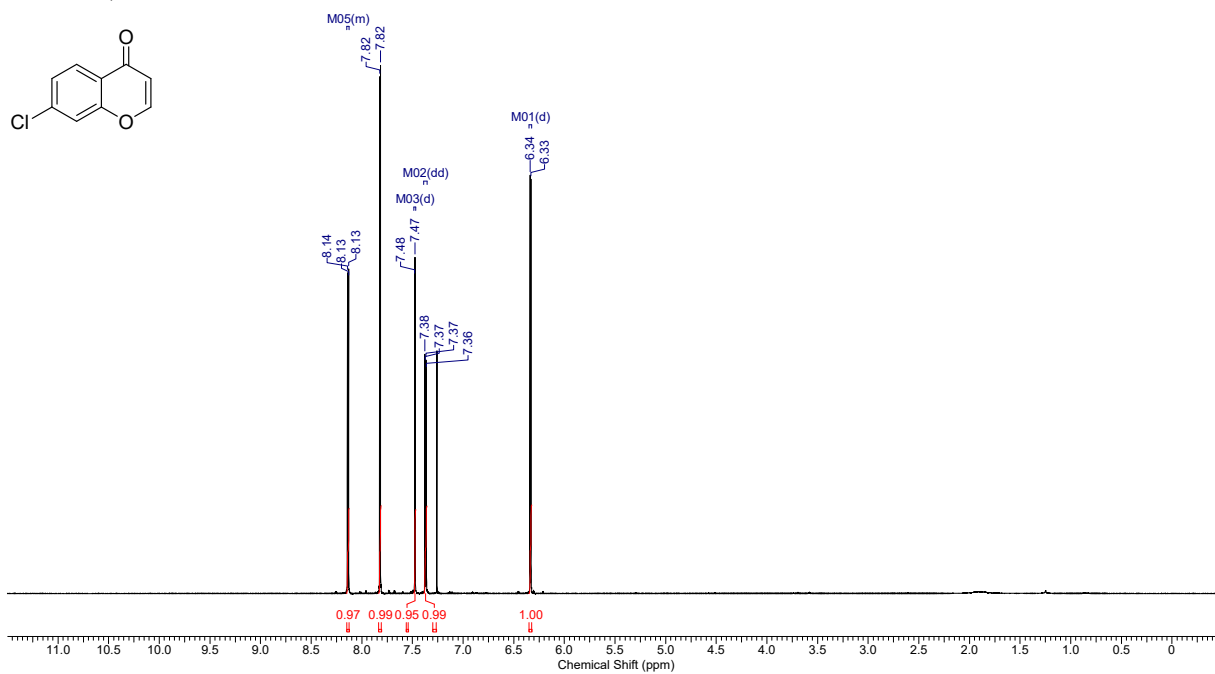

KDD361.2634.esp

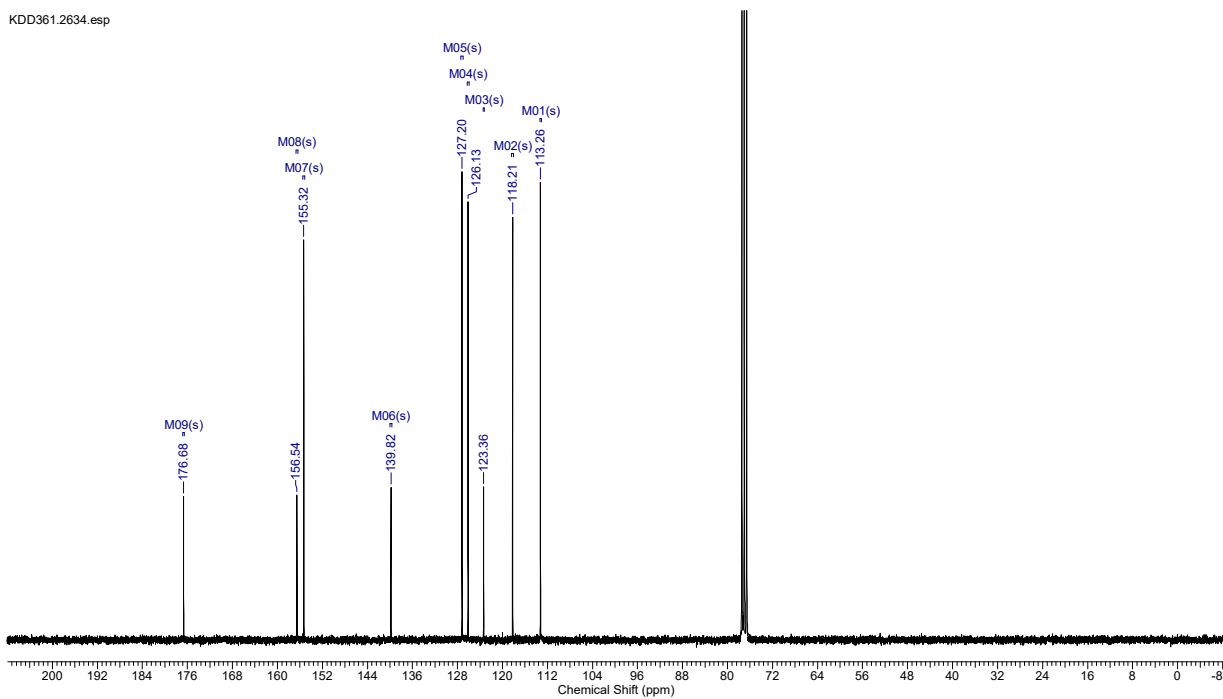

Figure S9. <sup>1</sup>H and <sup>13</sup>C NMR spectra of Oh

KDD365.24382.esp

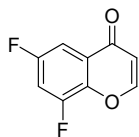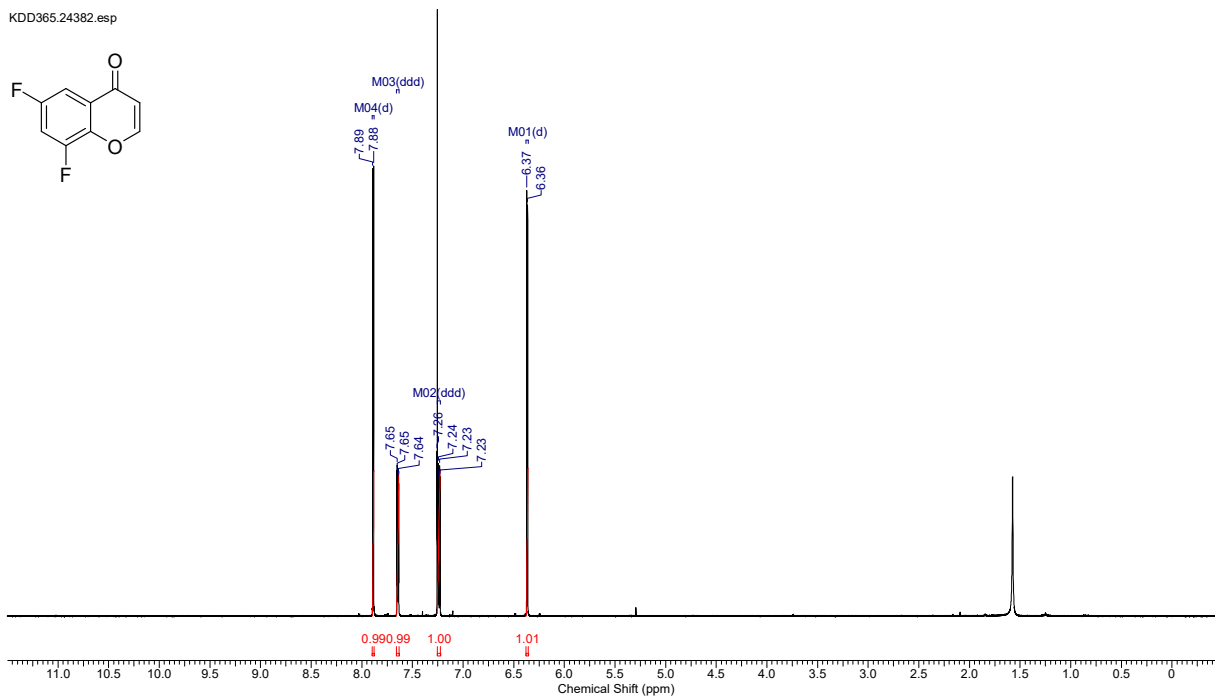

KDD365.2638.esp

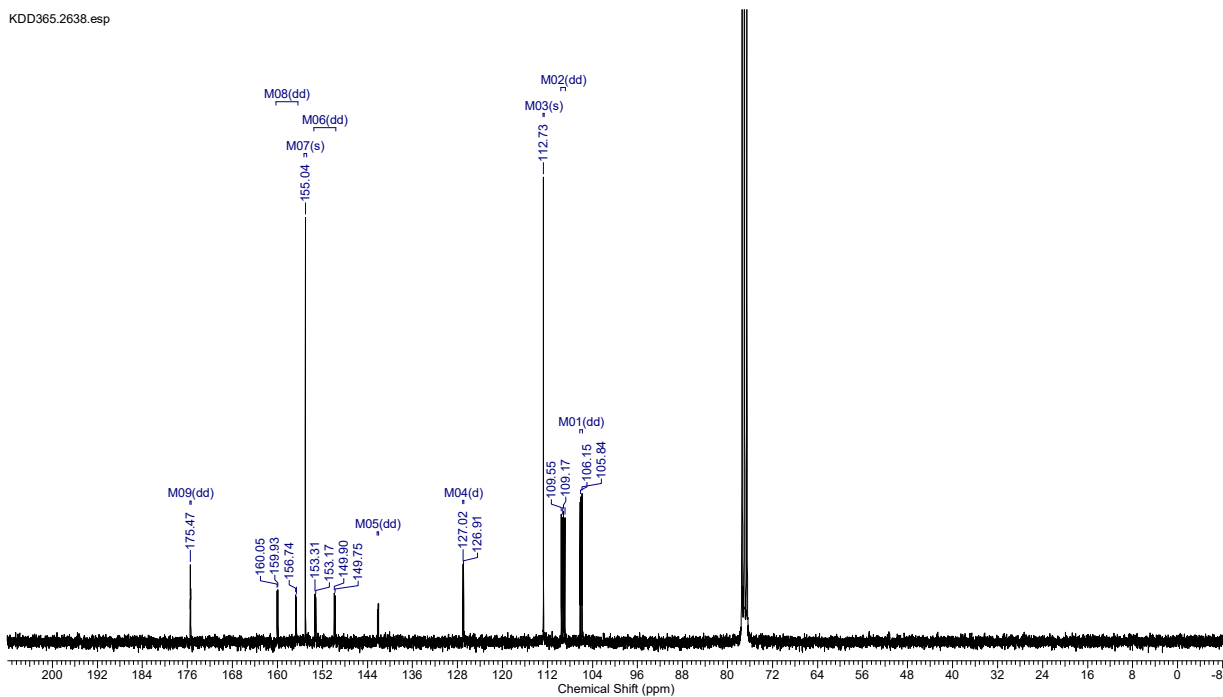

Figure S10. <sup>1</sup>H and <sup>13</sup>C NMR spectra of **0i**

KDD232.27990.esp

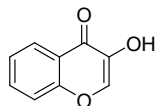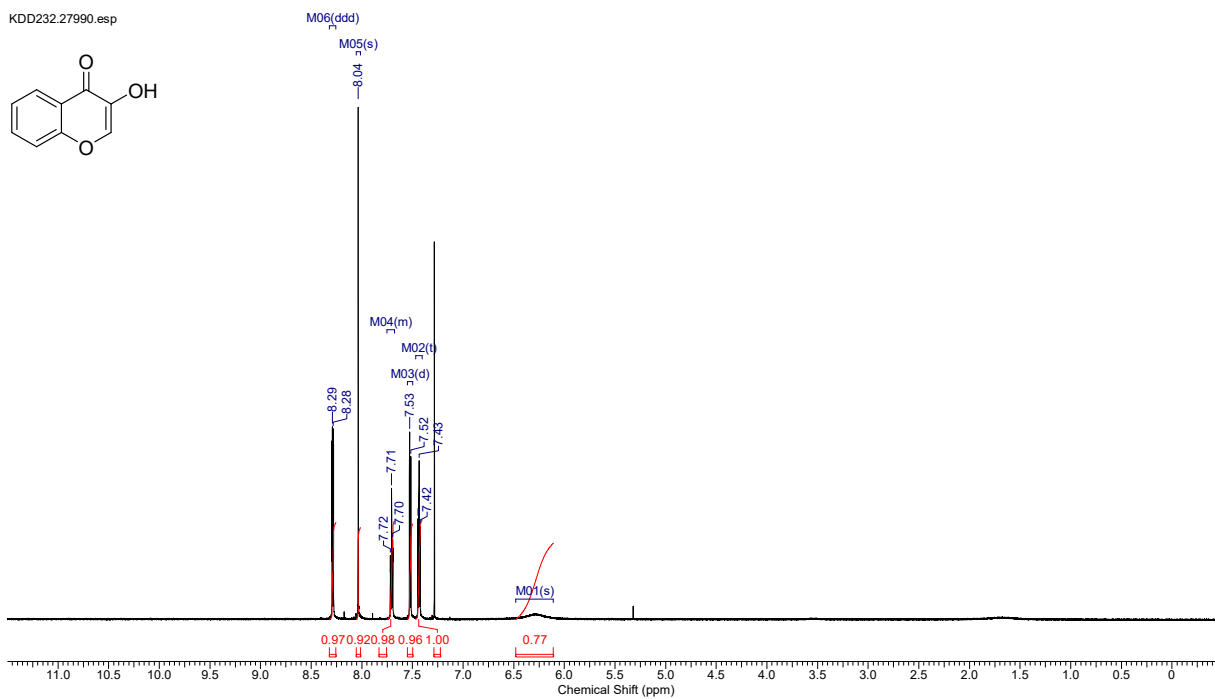

KDD232.2629.esp

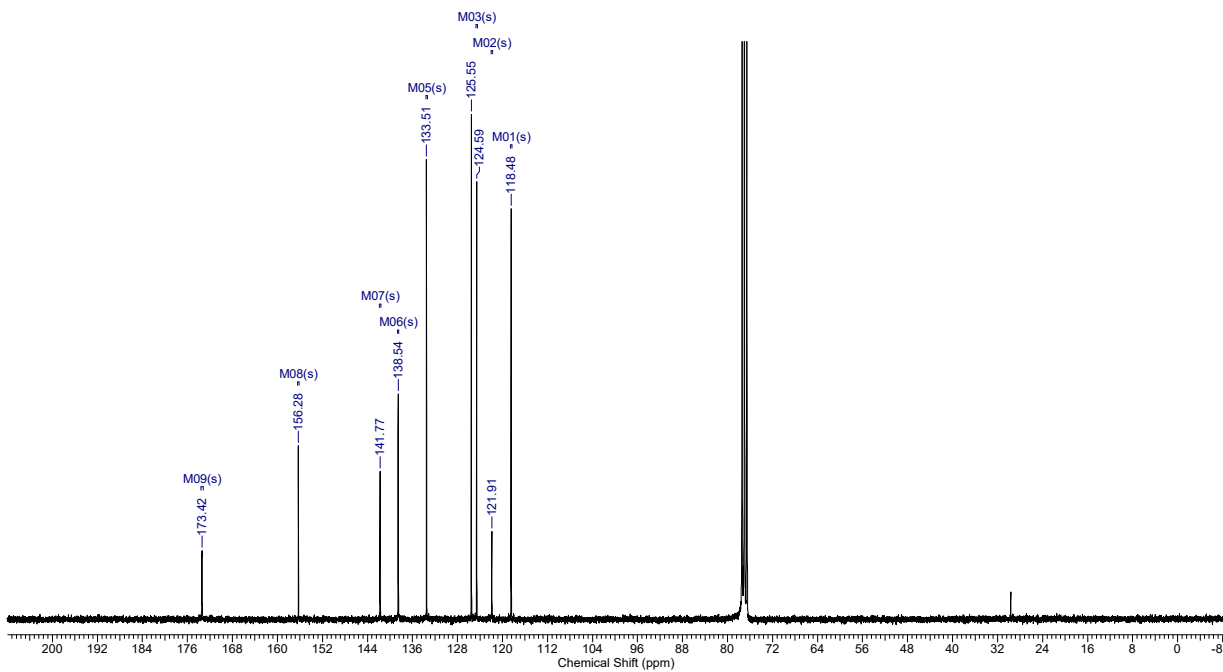

Figure S11. <sup>1</sup>H and <sup>13</sup>C NMR spectra of 1a

KDD386.24528.esp

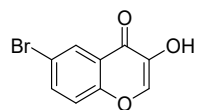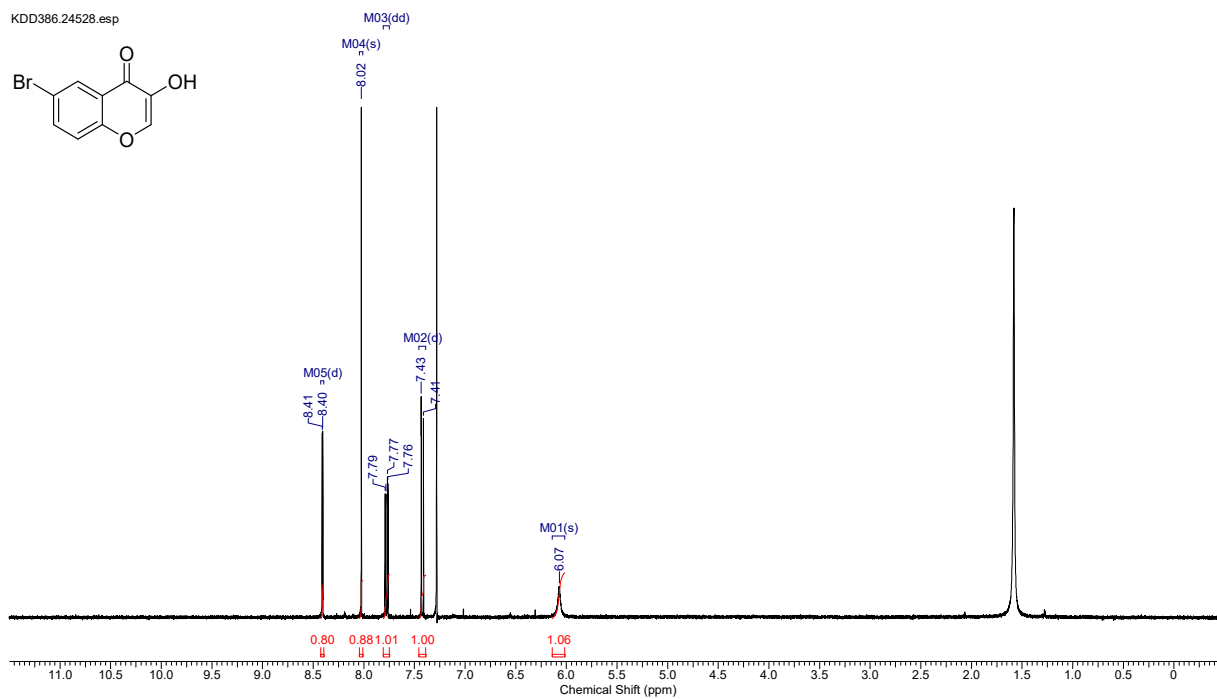

KDD386.2641.esp

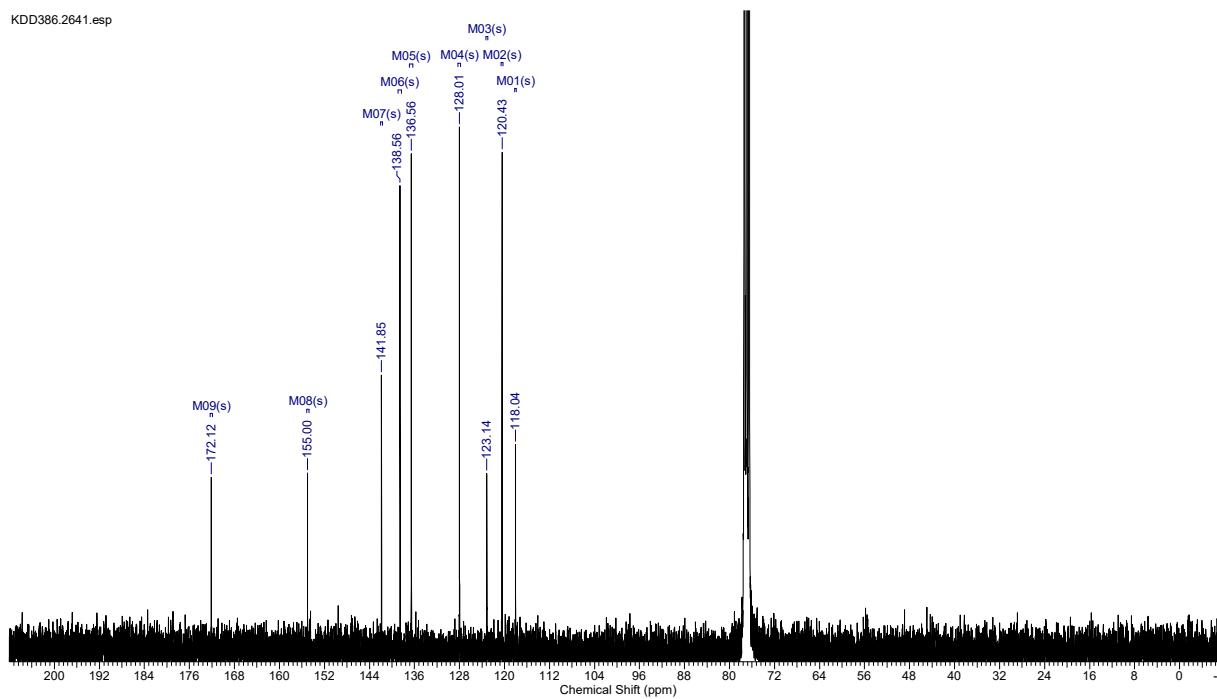

Figure S12. <sup>1</sup>H and <sup>13</sup>C NMR spectra of **1b**

KDD400.30581.esp

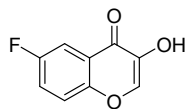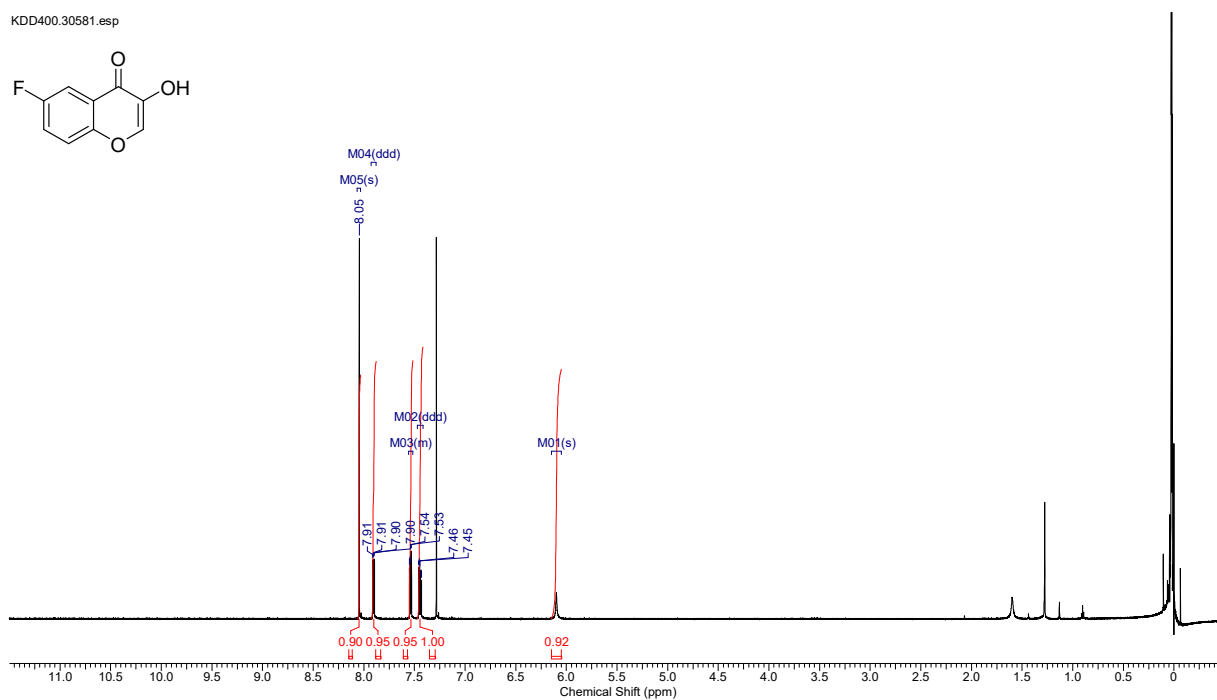

KDD400.30798.esp

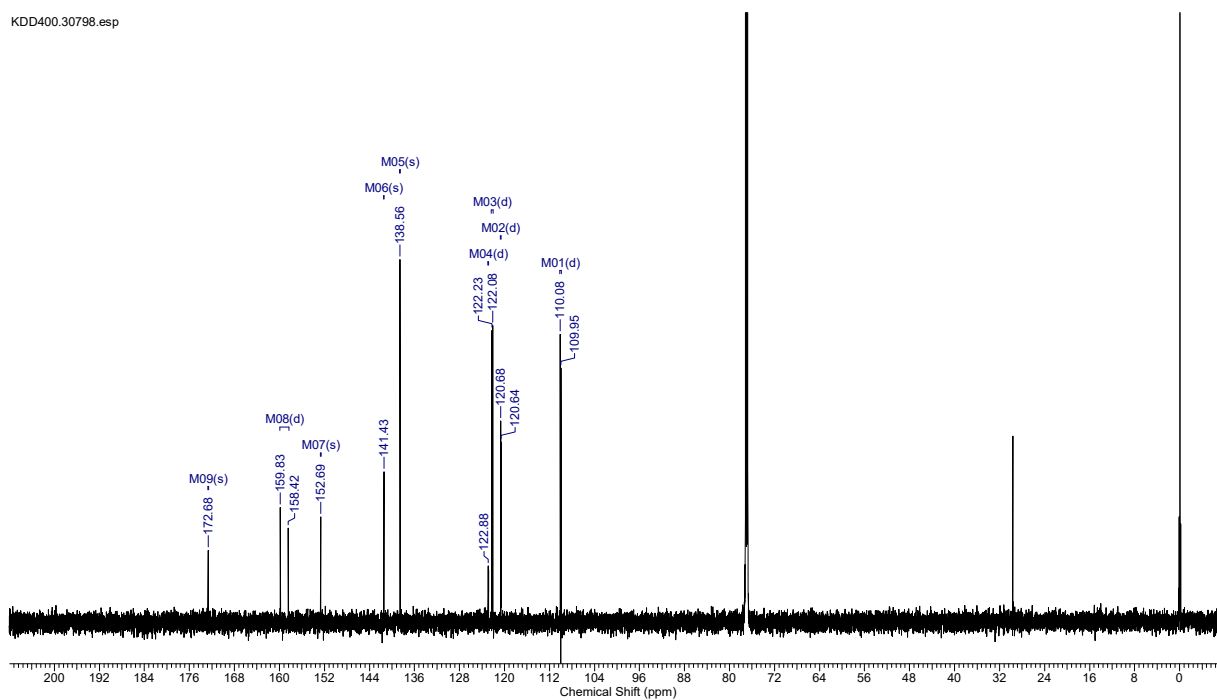

Figure S13. <sup>1</sup>H and <sup>13</sup>C NMR spectra of **1c**

KDD389.24183.esp

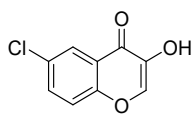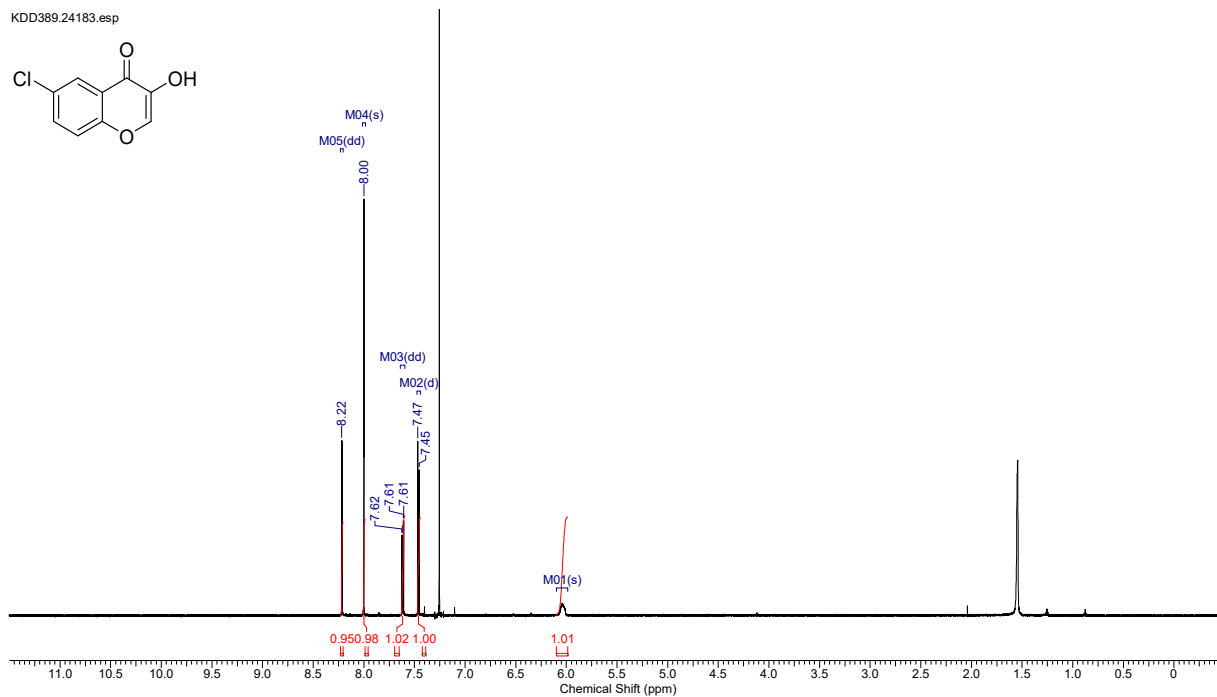

KDD389.2642.esp

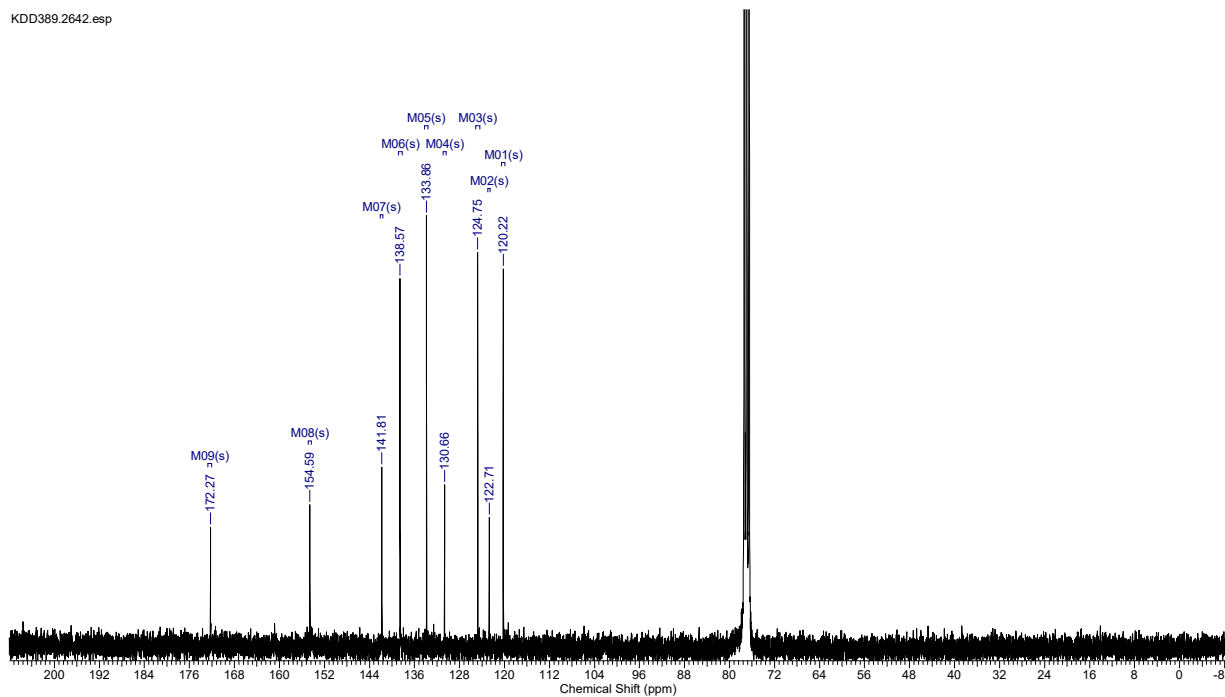

Figure S14.  $^1\text{H}$  and  $^{13}\text{C}$  NMR spectra of **1d**



KDD367.23509.esp

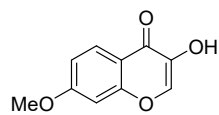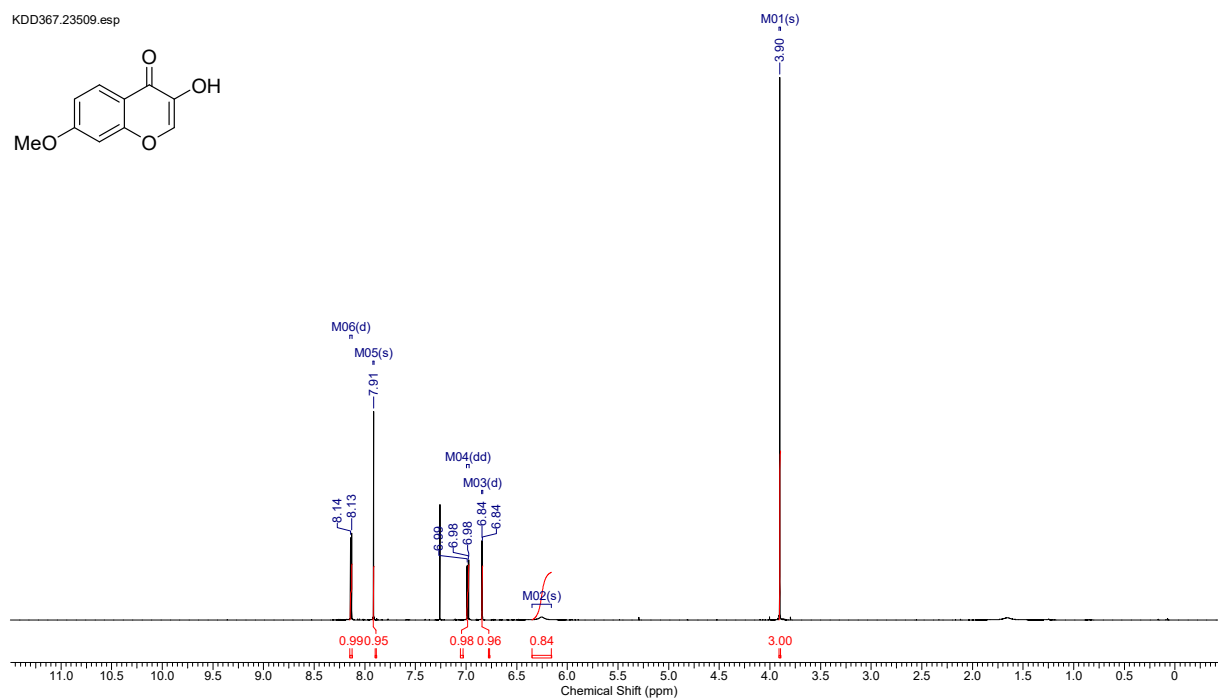

KDD367.2639.esp

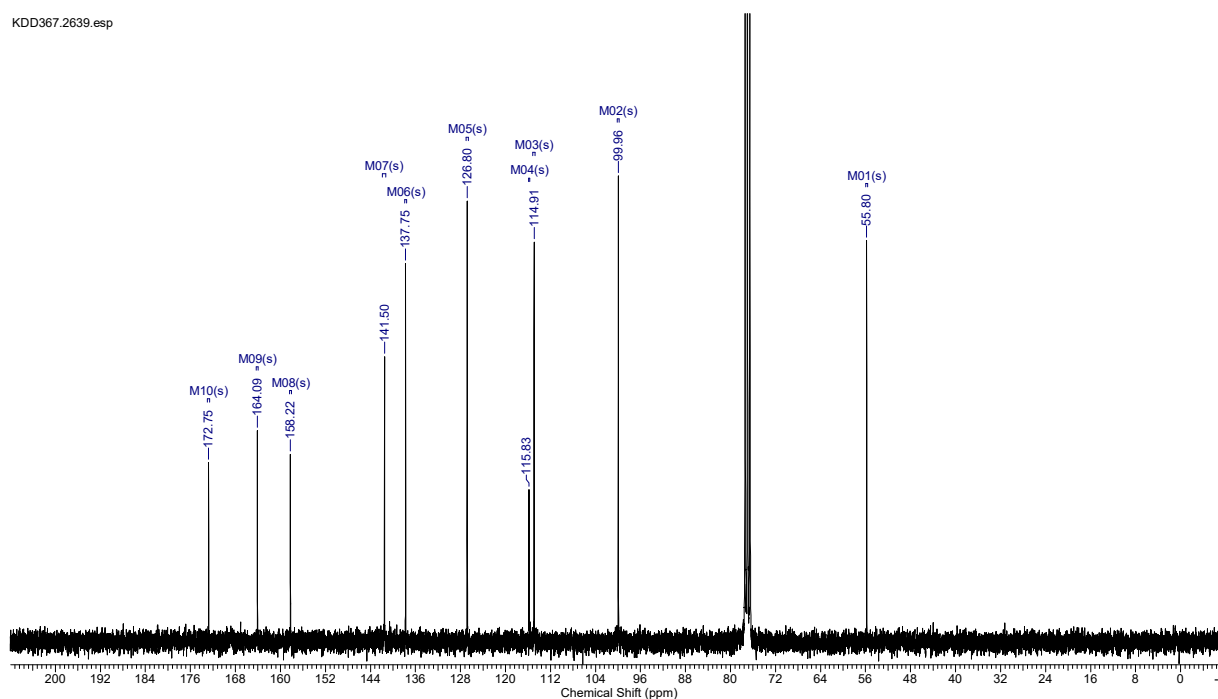

Figure S15.  $^1\text{H}$  and  $^{13}\text{C}$  NMR spectra of **1e**

KDD368.23562.esp

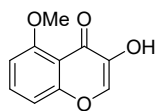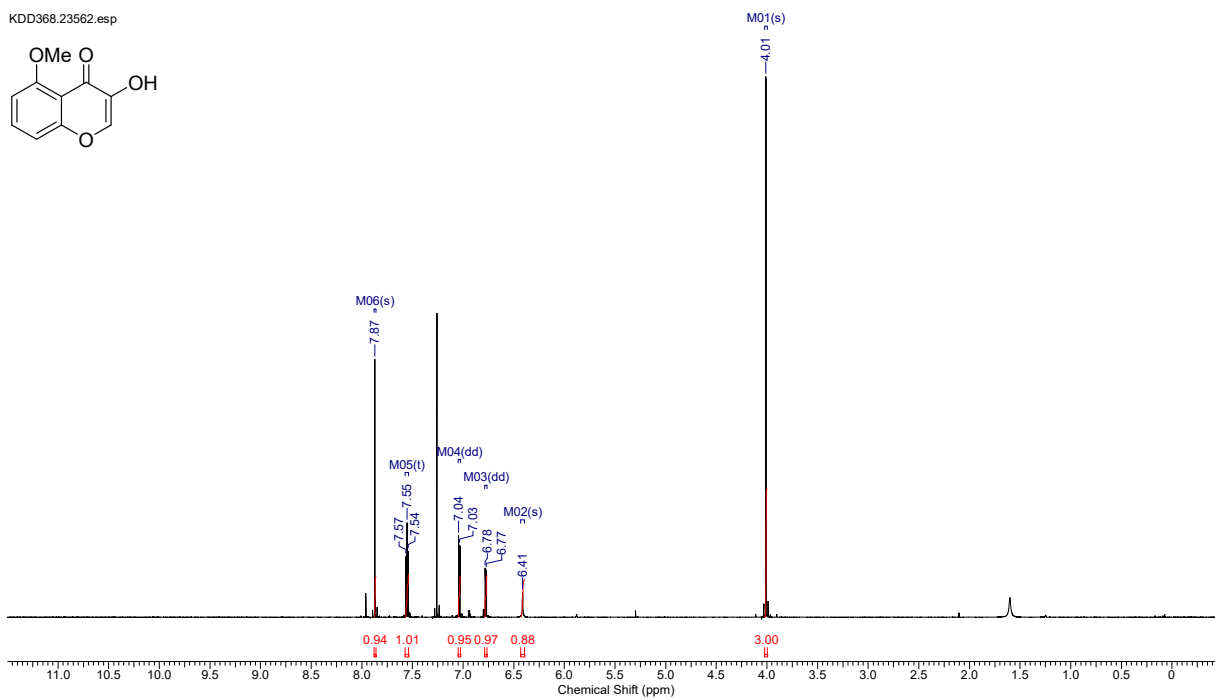

KDD368.2640.esp

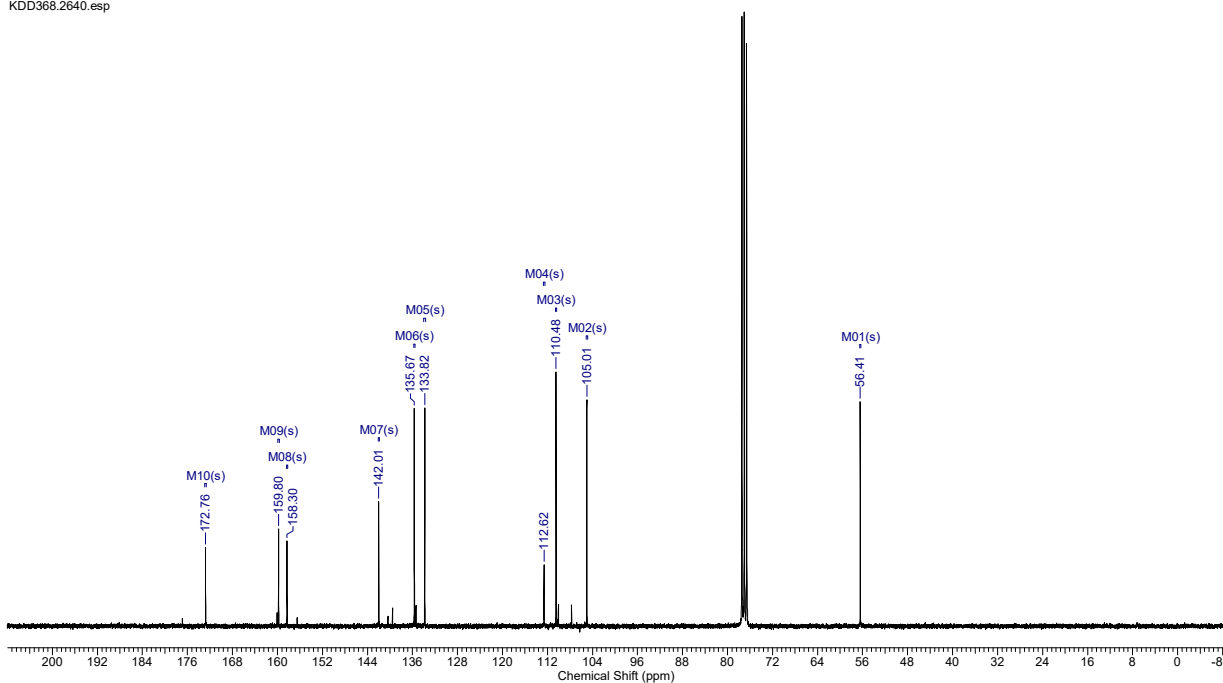

Figure S16. <sup>1</sup>H and <sup>13</sup>C NMR spectra of 1f

KDD399.24387.esp

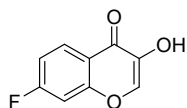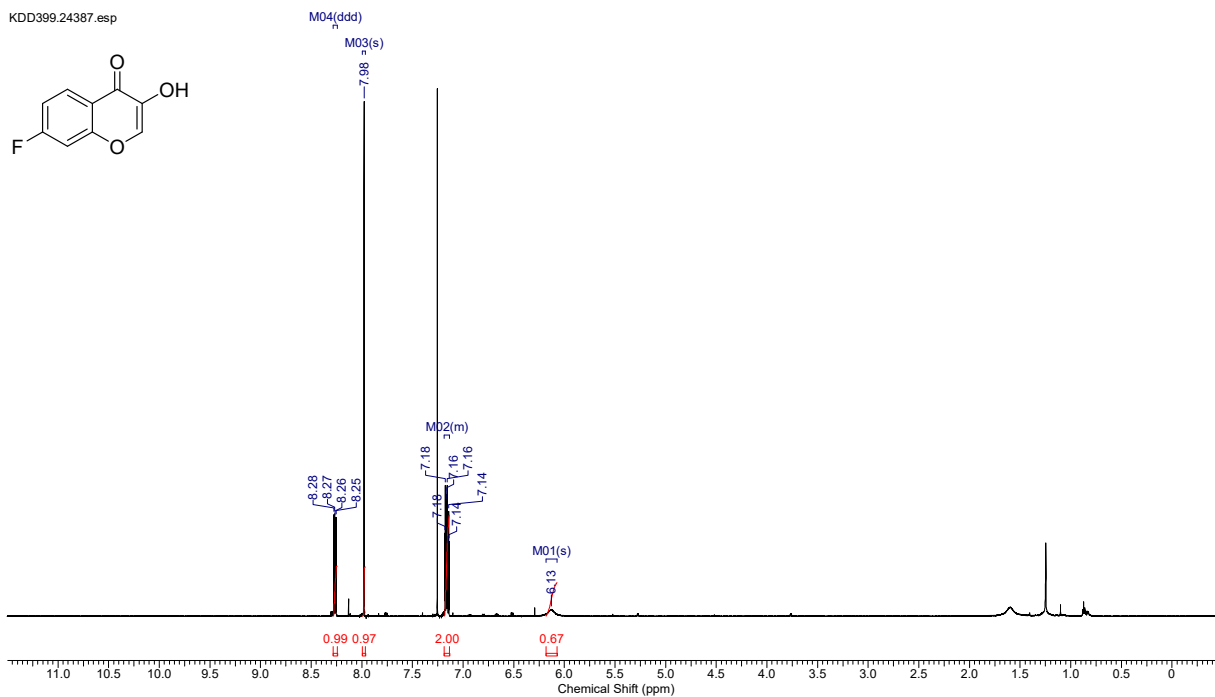

KDD399.2644.esp

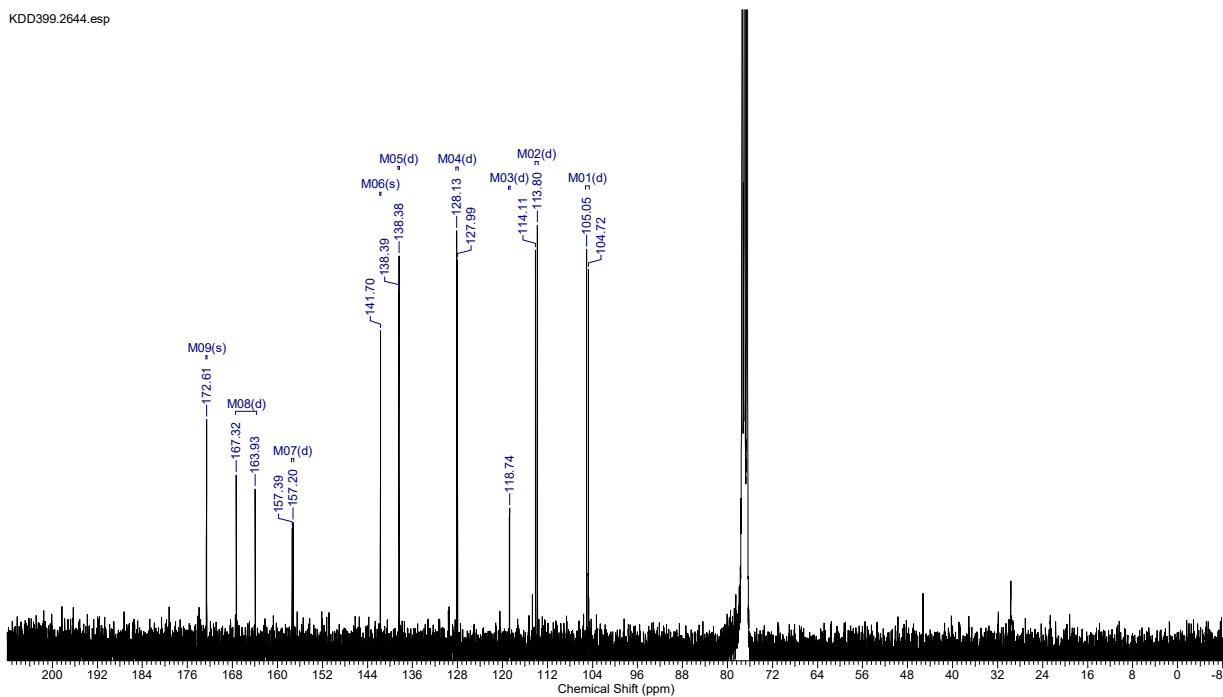

Figure S17. <sup>1</sup>H and <sup>13</sup>C NMR spectra of **1g**

KDD397.24383.esp

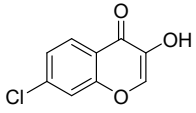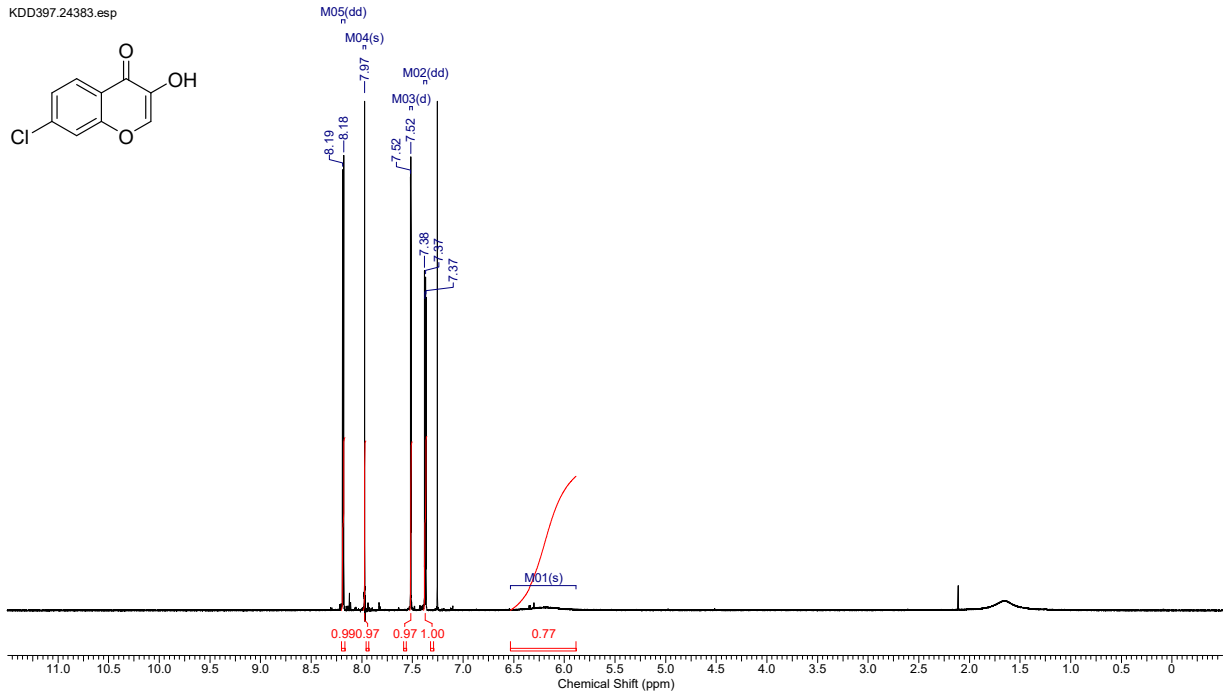

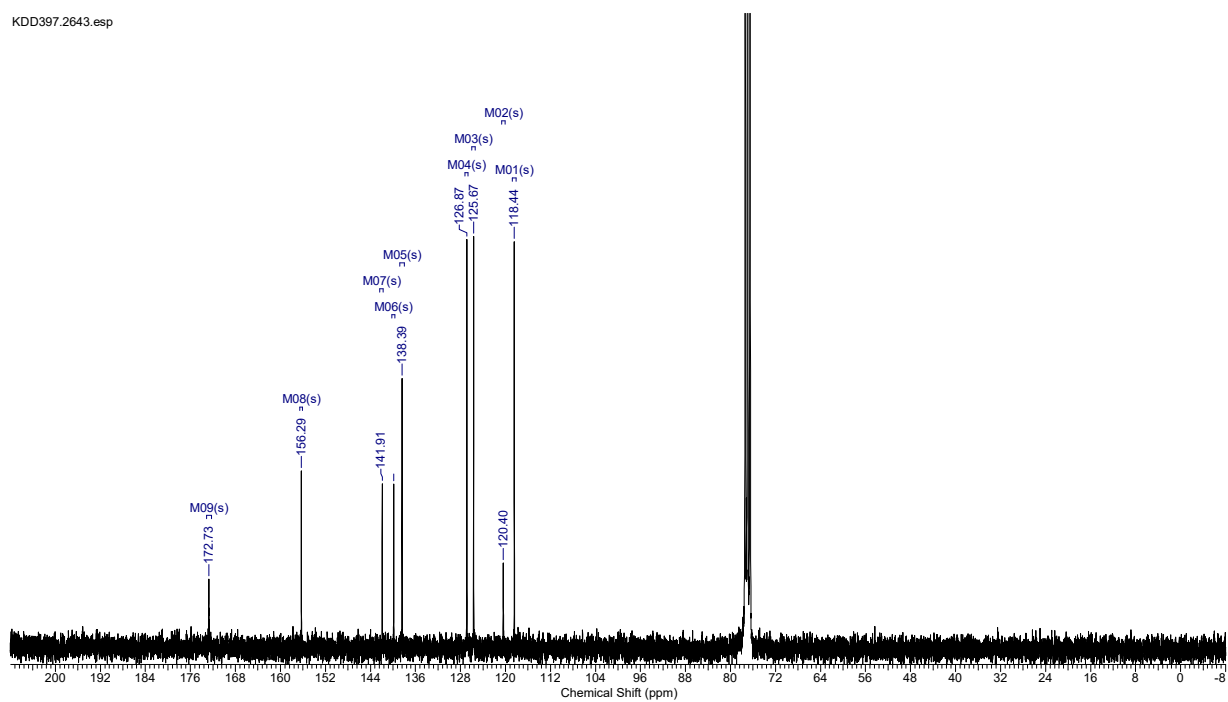Figure S18.  $^1\text{H}$  and  $^{13}\text{C}$  NMR spectra of **1h**

KDD401.30582.esp

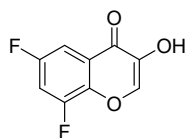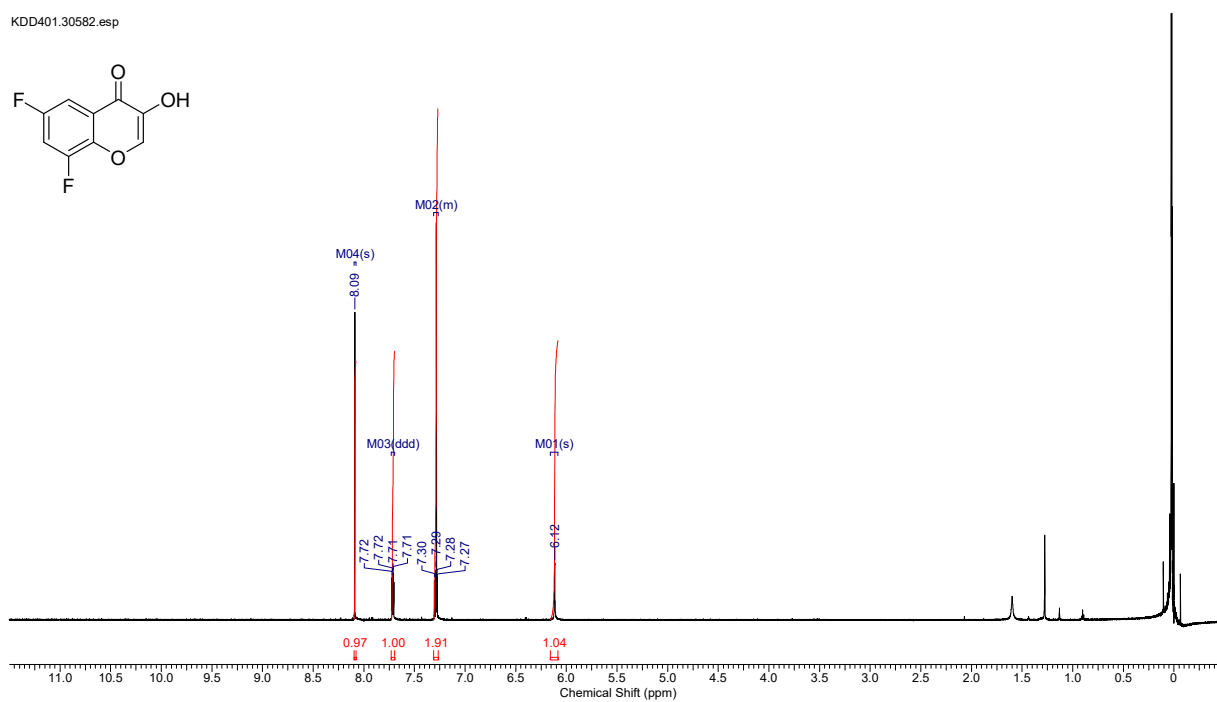

KDD401.30810.esp

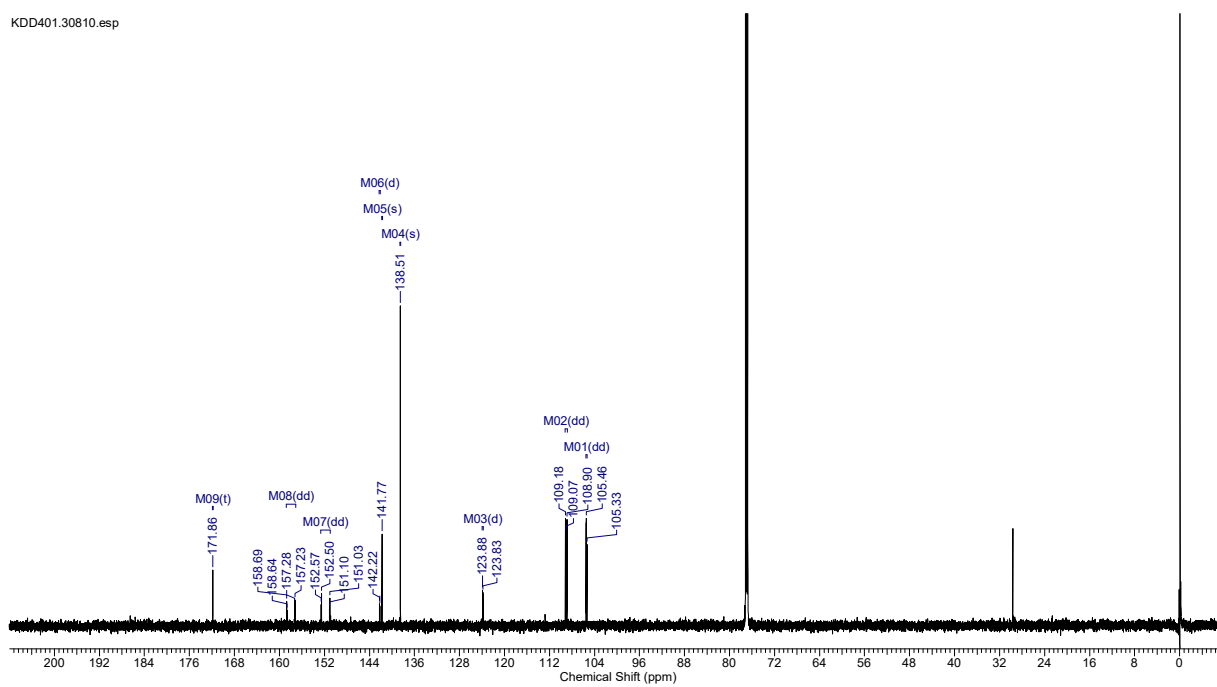

Figure S19.  $^1\text{H}$  and  $^{13}\text{C}$  NMR spectra of **1i**

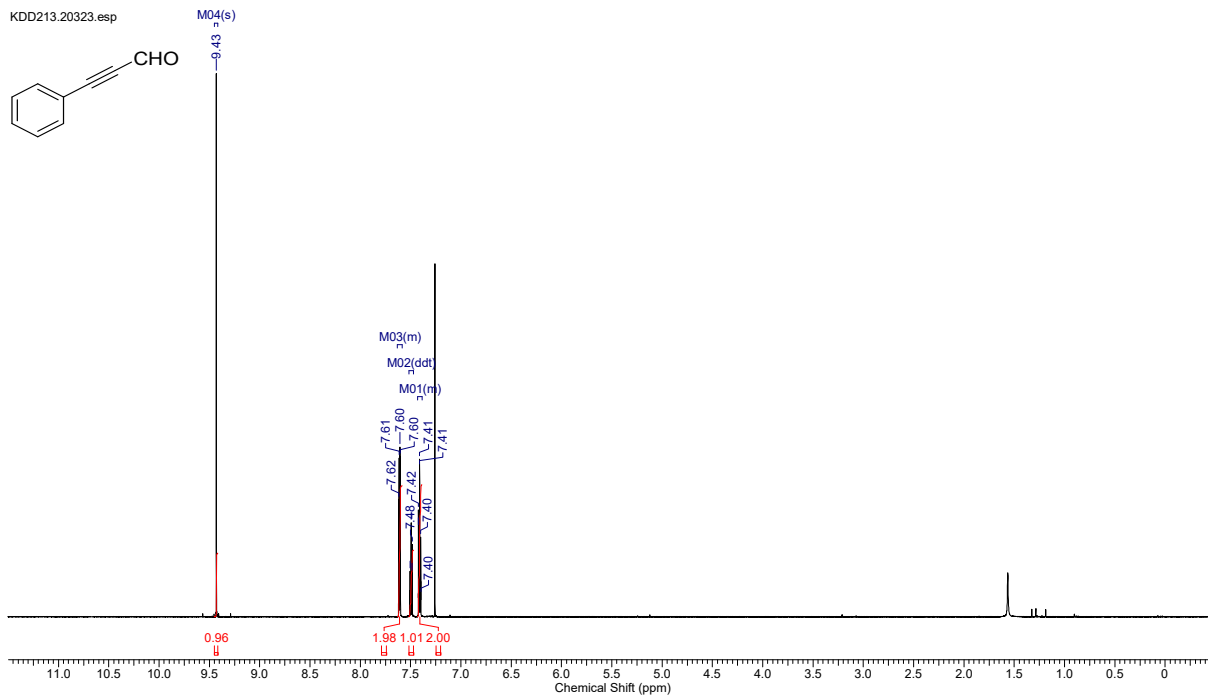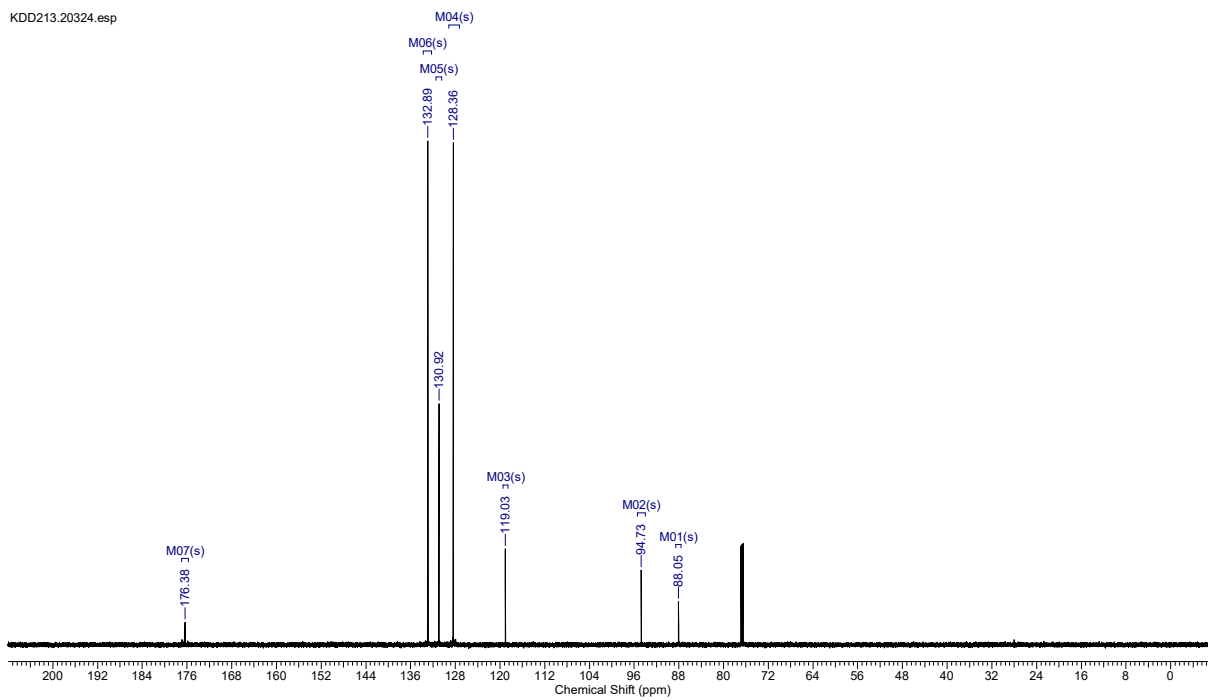

Figure S20.  $^1\text{H}$  and  $^{13}\text{C}$  NMR spectra of 2a

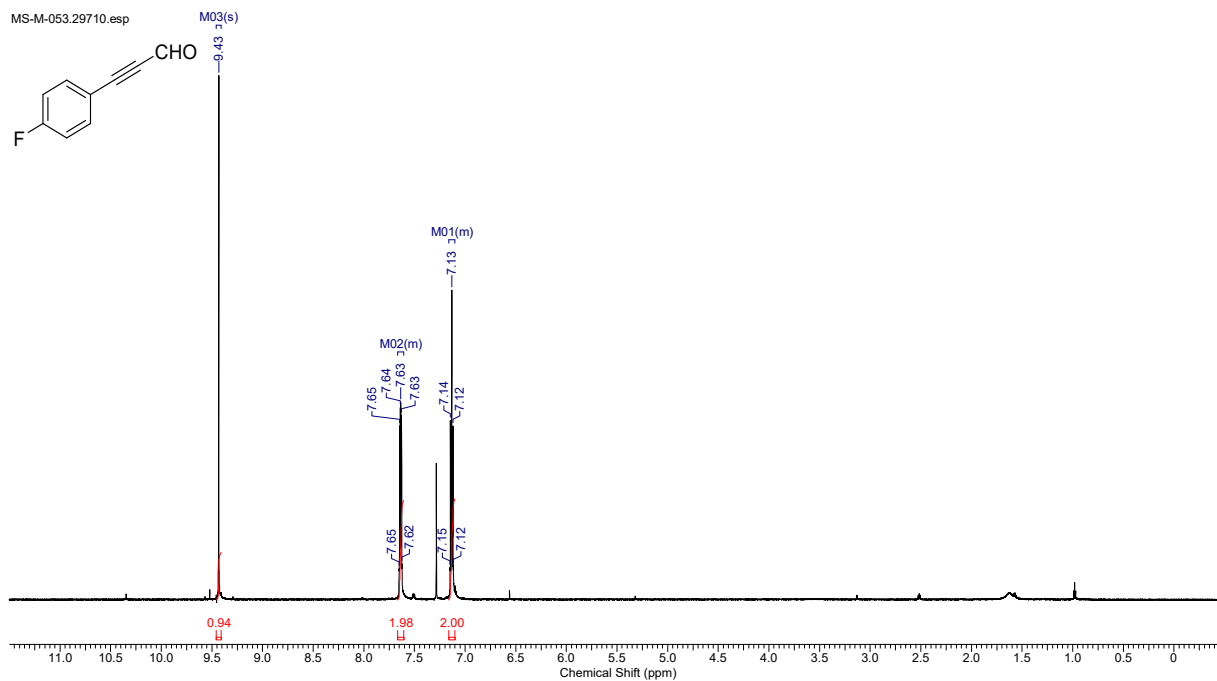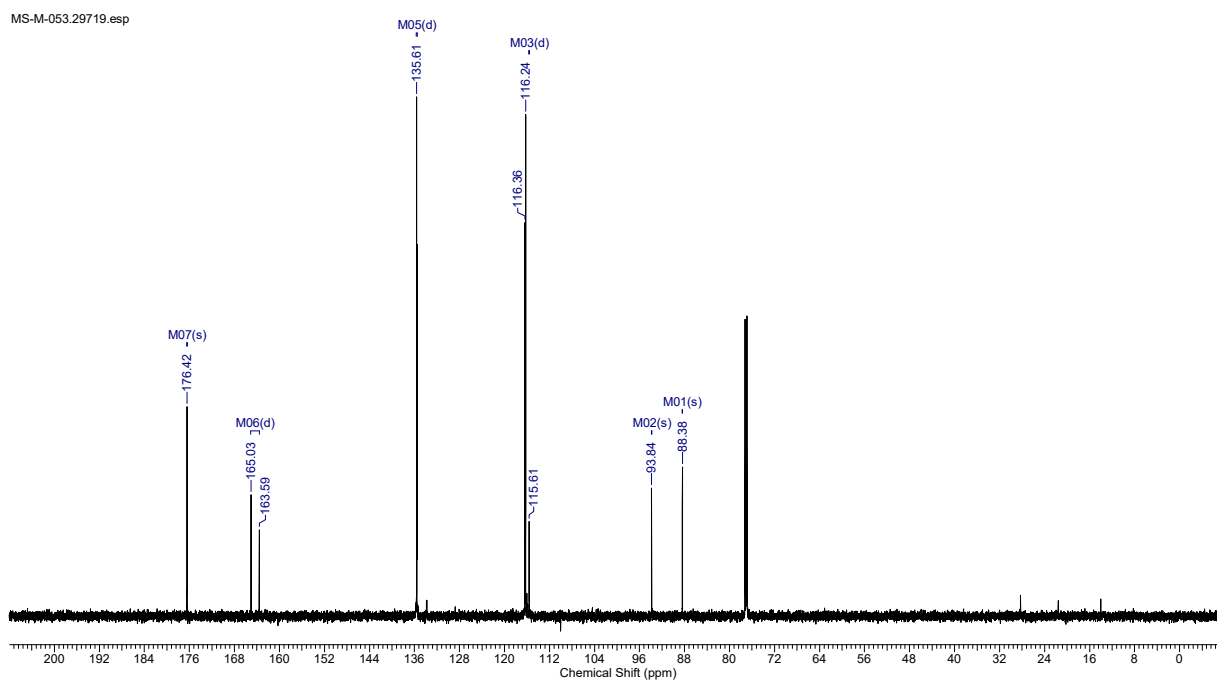

Figure S21.  $^1\text{H}$  and  $^{13}\text{C}$  NMR spectra of **2b**



MS-M-003.24813.esp

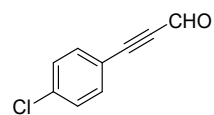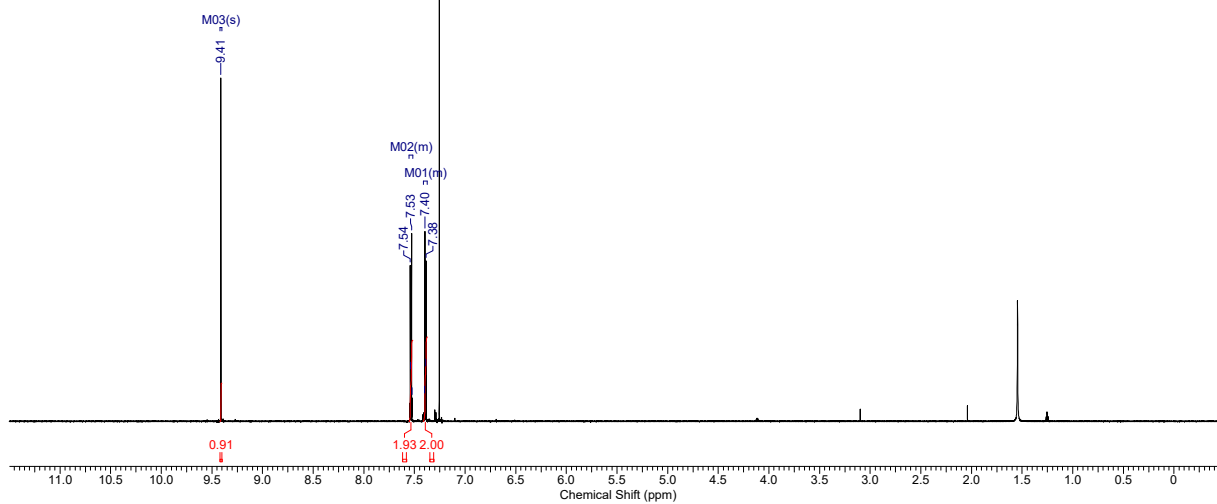

MS-M-003.23883.esp

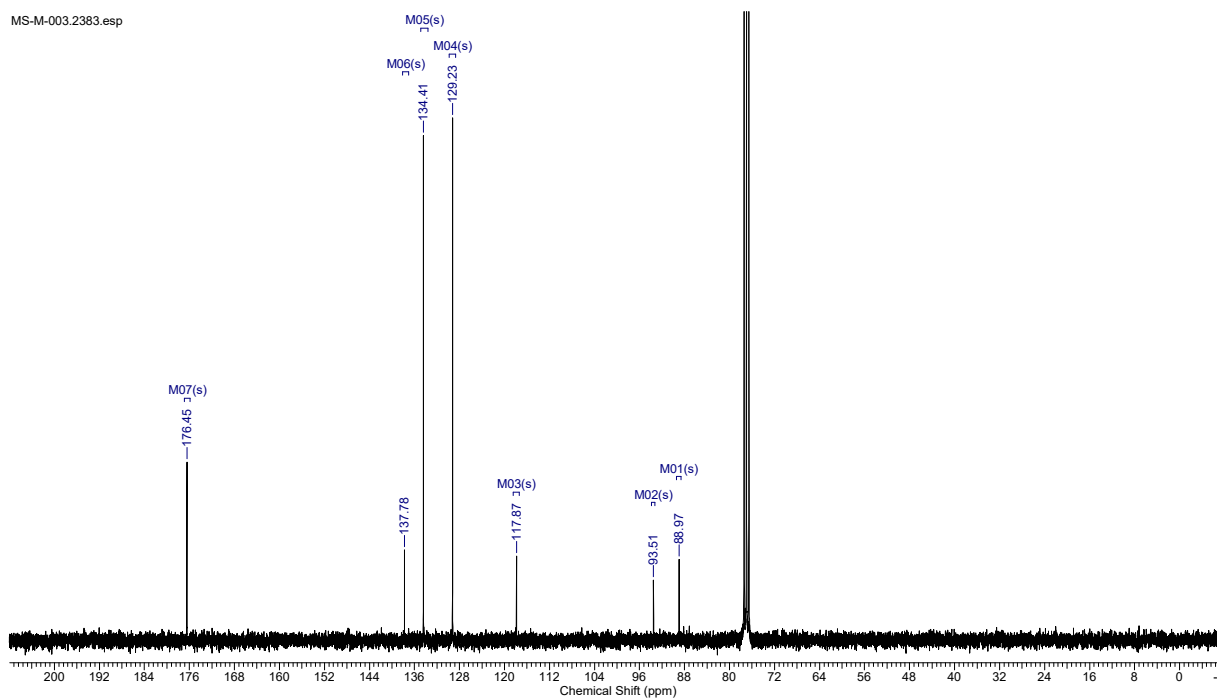

Figure S22. <sup>1</sup>H and <sup>13</sup>C NMR spectra of **2c**

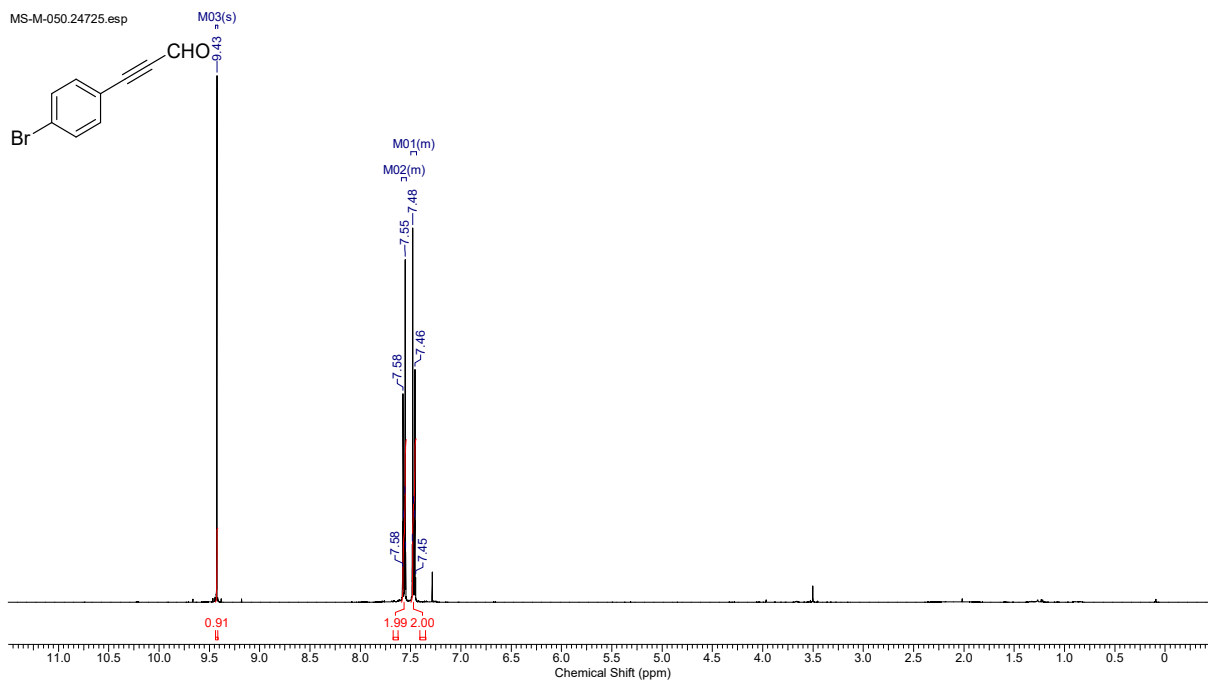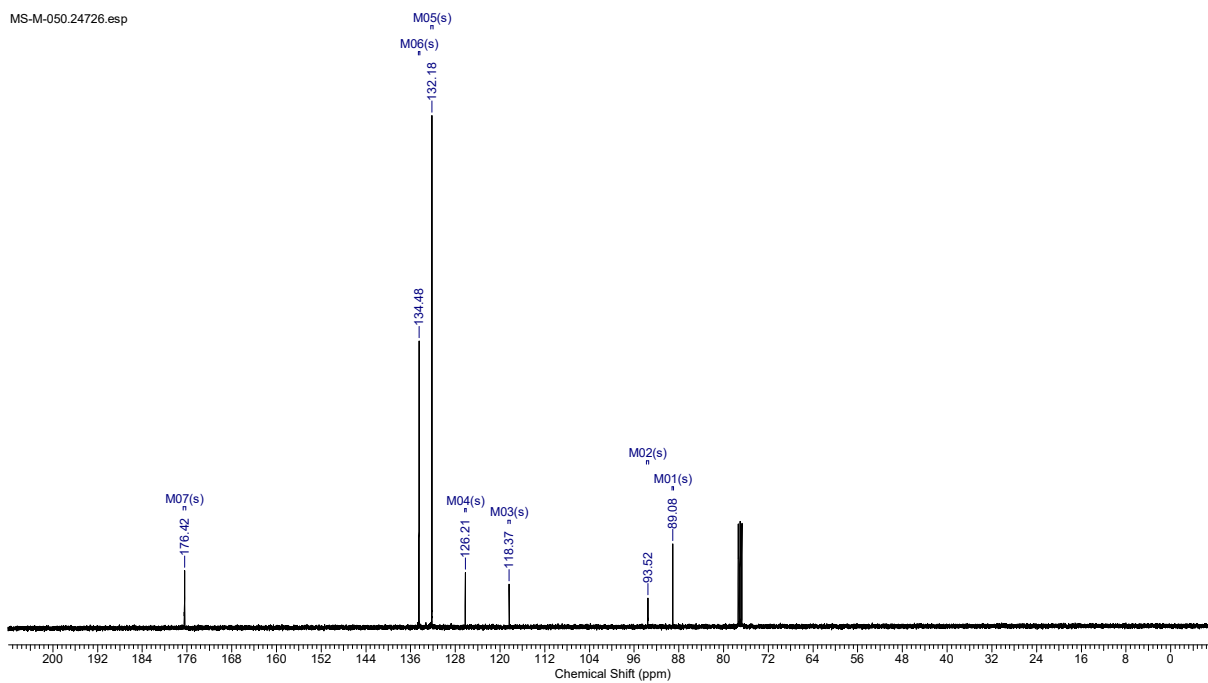

Figure S23.  $^1\text{H}$  and  $^{13}\text{C}$  NMR spectra of **2d**

MS-M-045.29601.esp

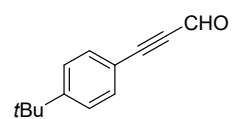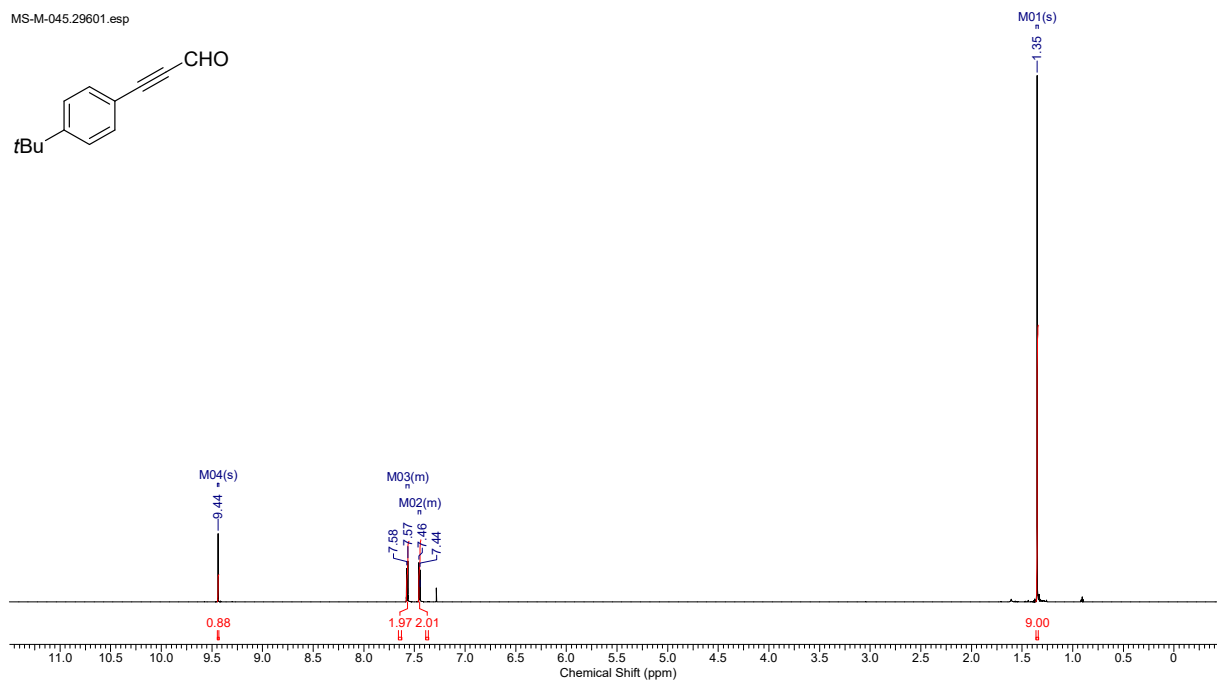

MS-M-045.29605.esp

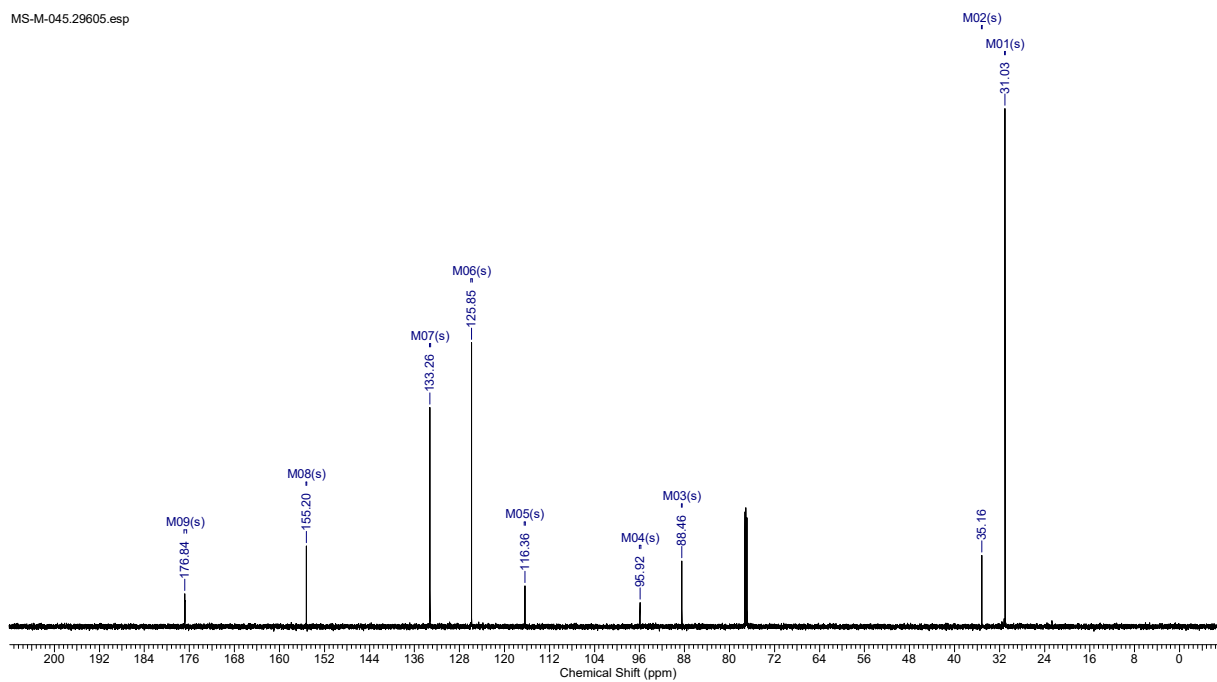

Figure S24. <sup>1</sup>H and <sup>13</sup>C NMR spectra of 2e

MS-M-001.24726.esp

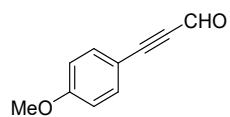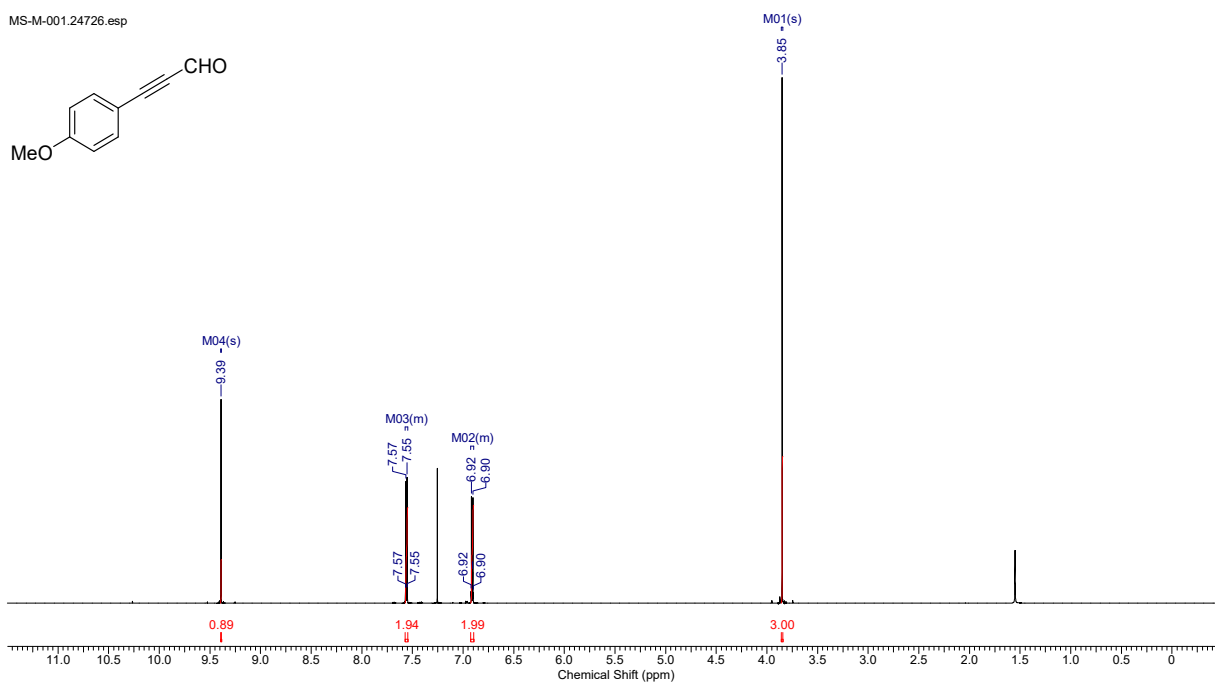

MS-M-001.2381.esp

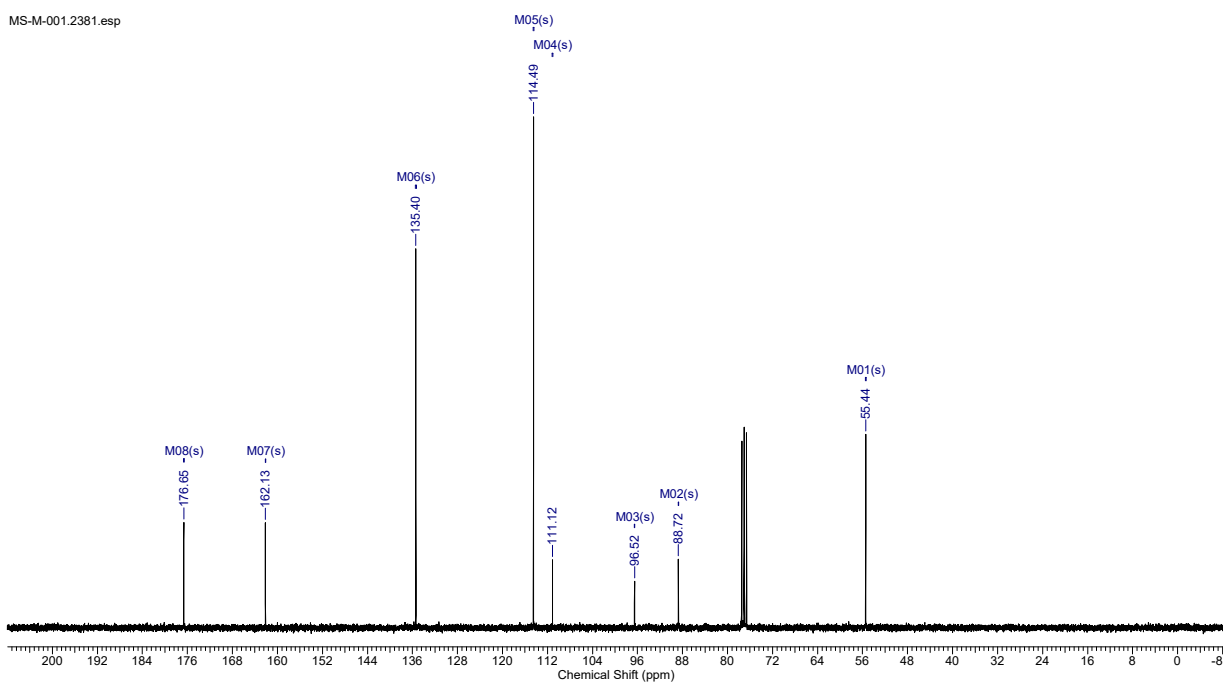

Figure S25. <sup>1</sup>H and <sup>13</sup>C NMR spectra of 2f

MS-M-043.29410.esp

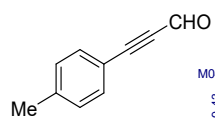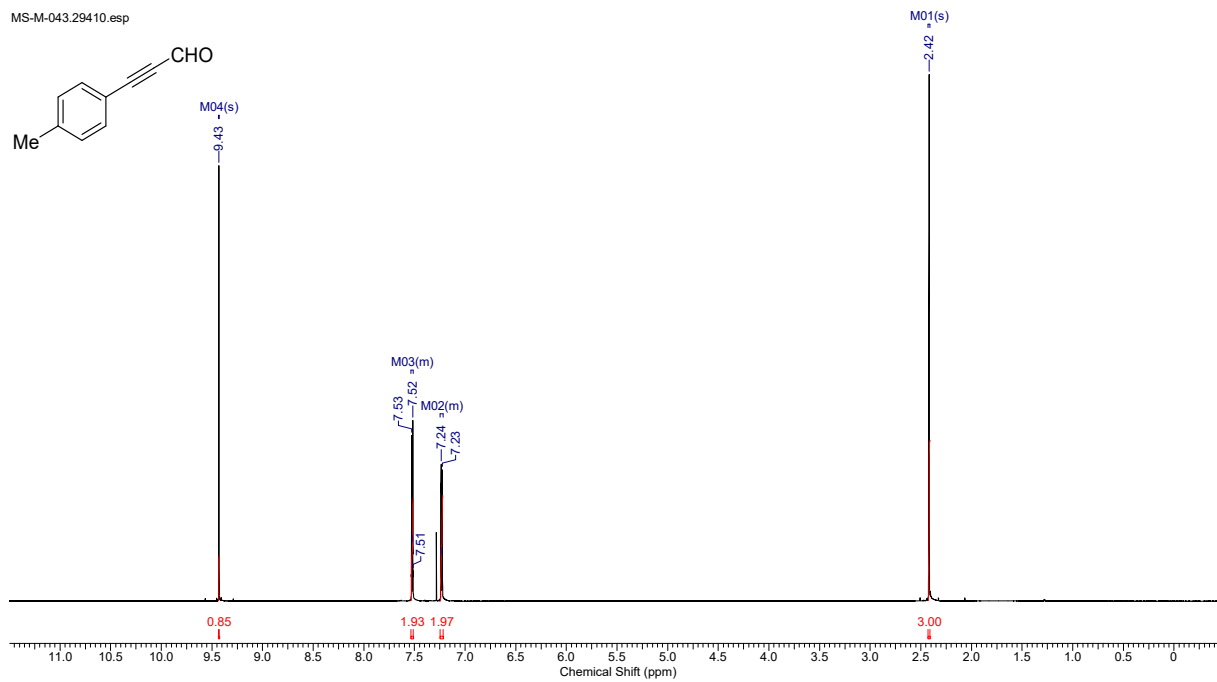

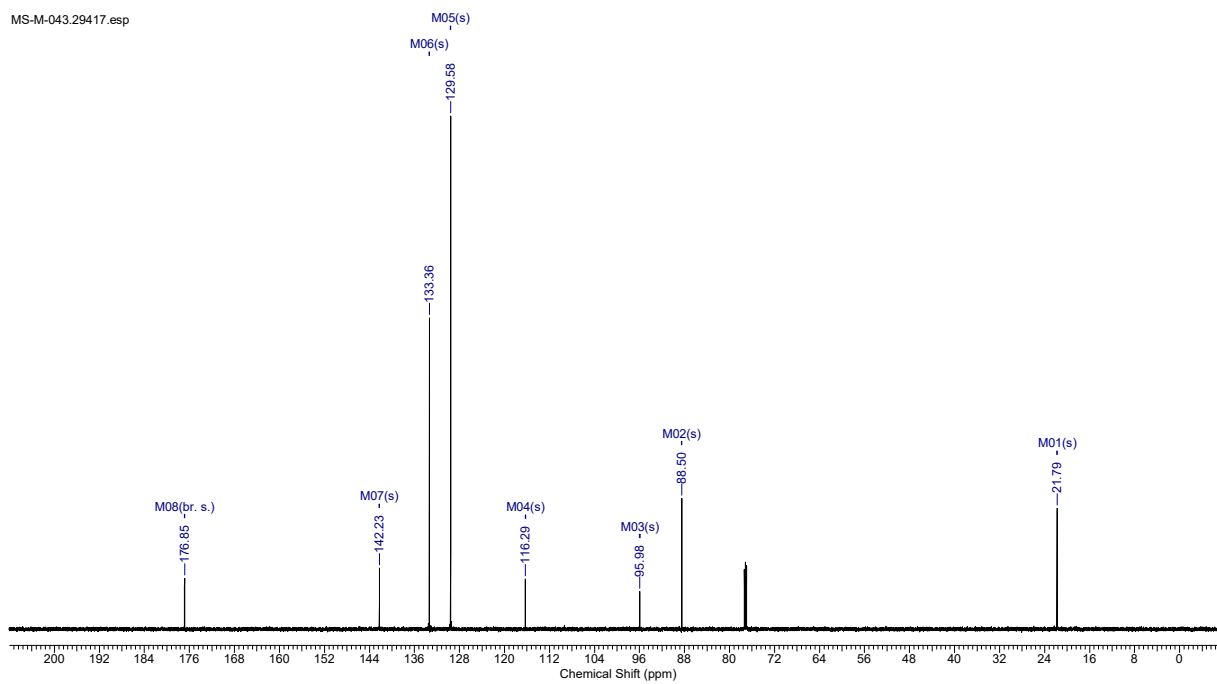

Figure S26.  $^1\text{H}$  and  $^{13}\text{C}$  NMR spectra of **2g**

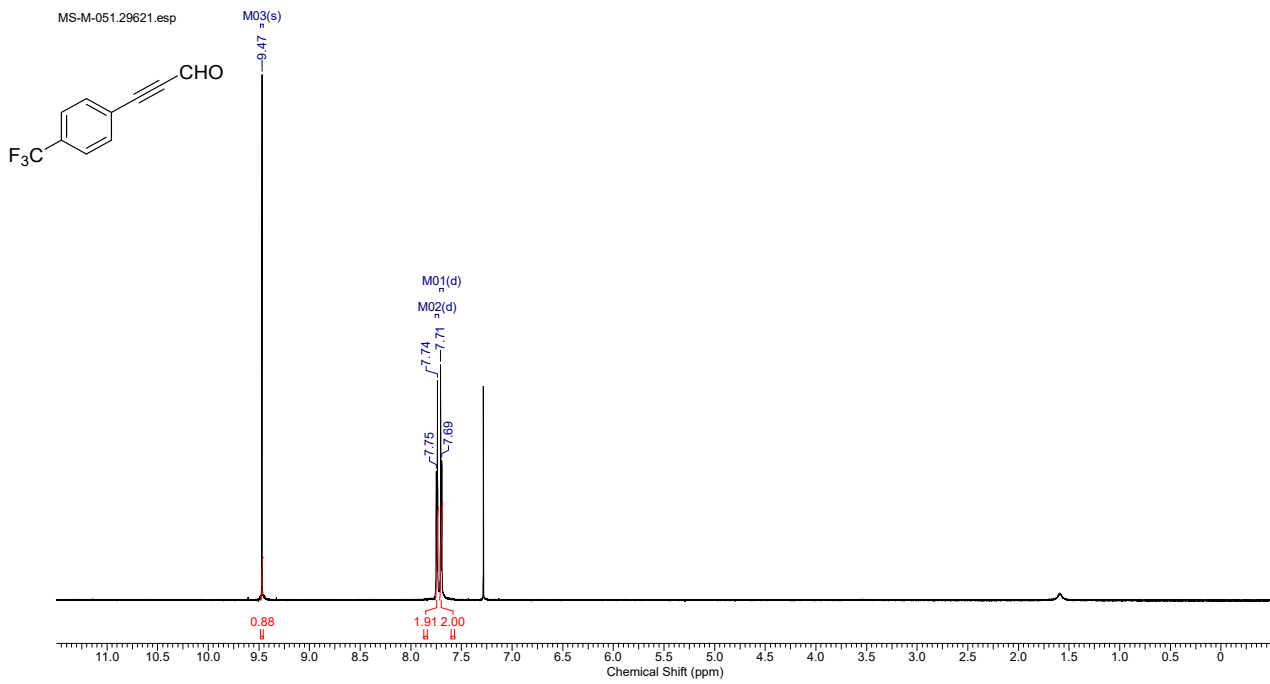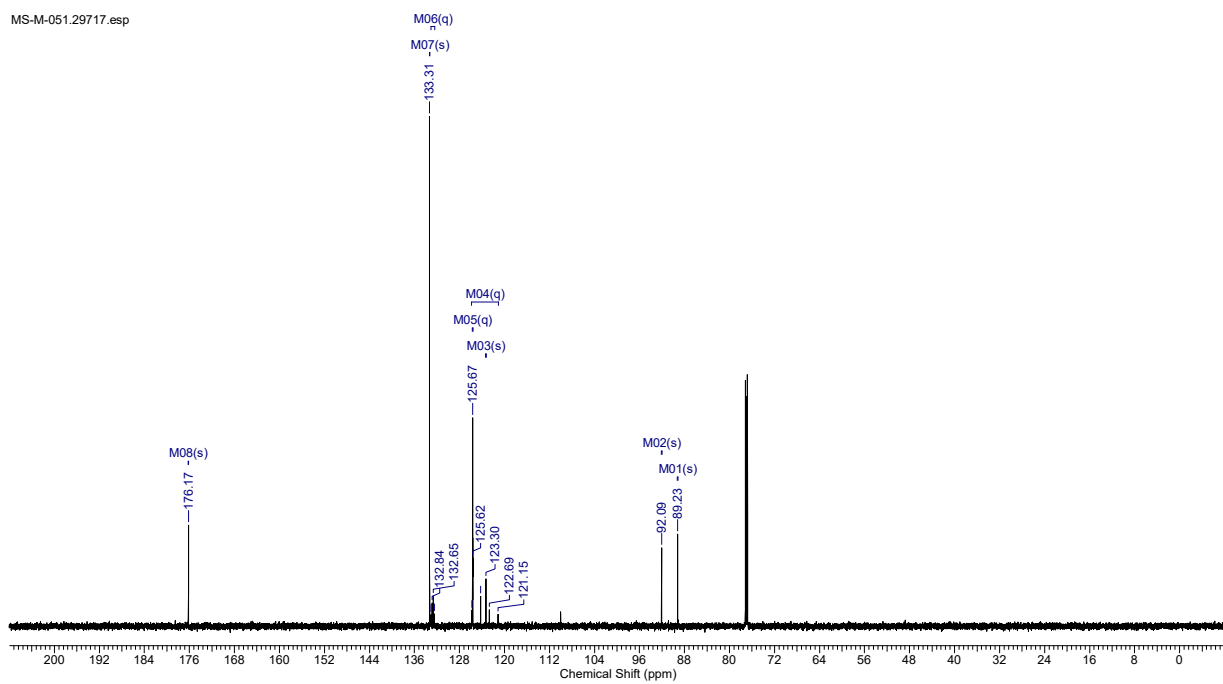

Figure S27. <sup>1</sup>H and <sup>13</sup>C NMR spectra of **2h**

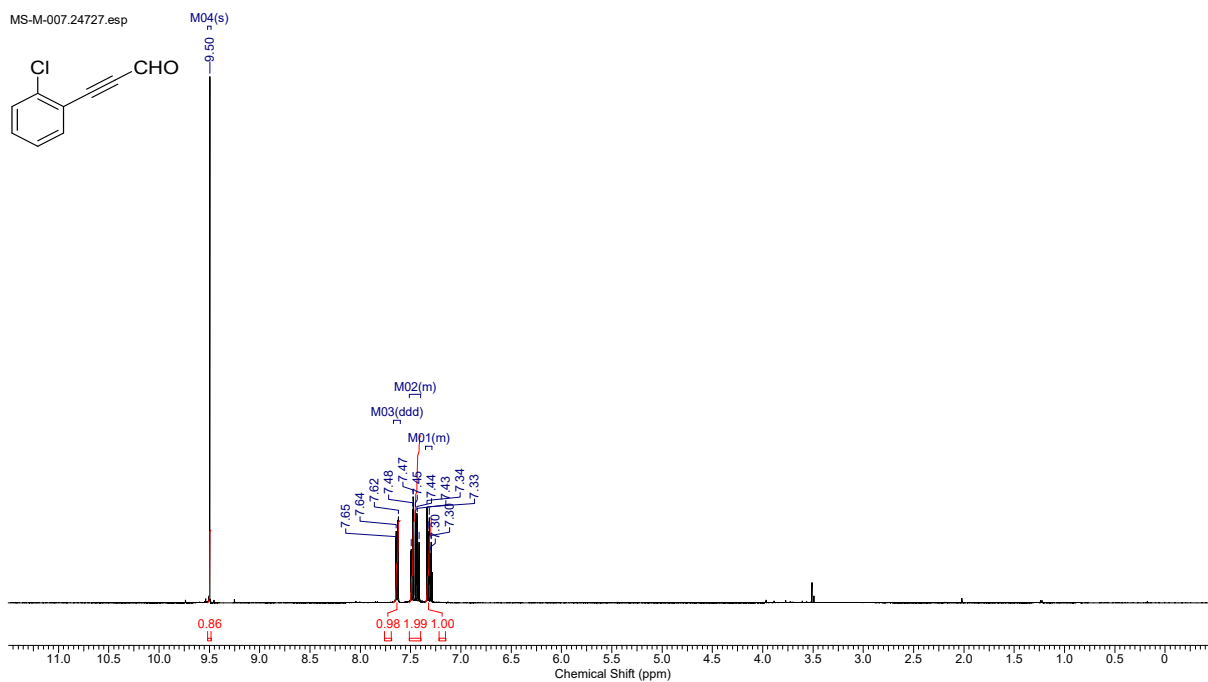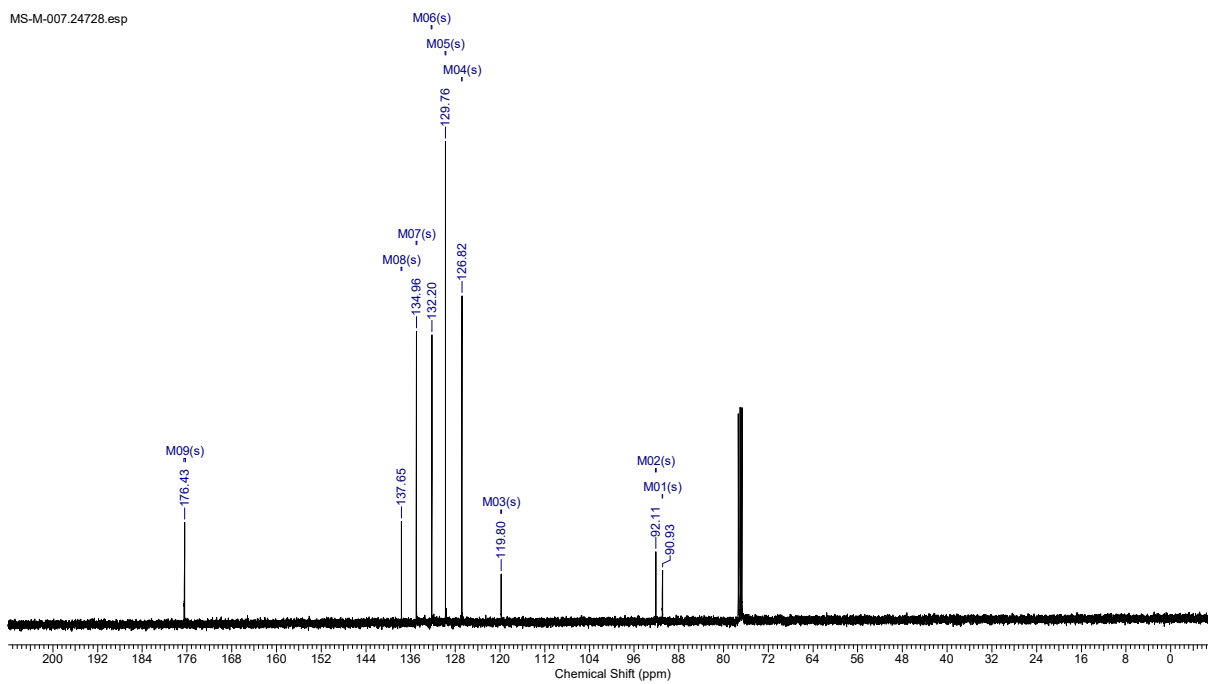

Figure S28.  $^1\text{H}$  and  $^{13}\text{C}$  NMR spectra of **2i**



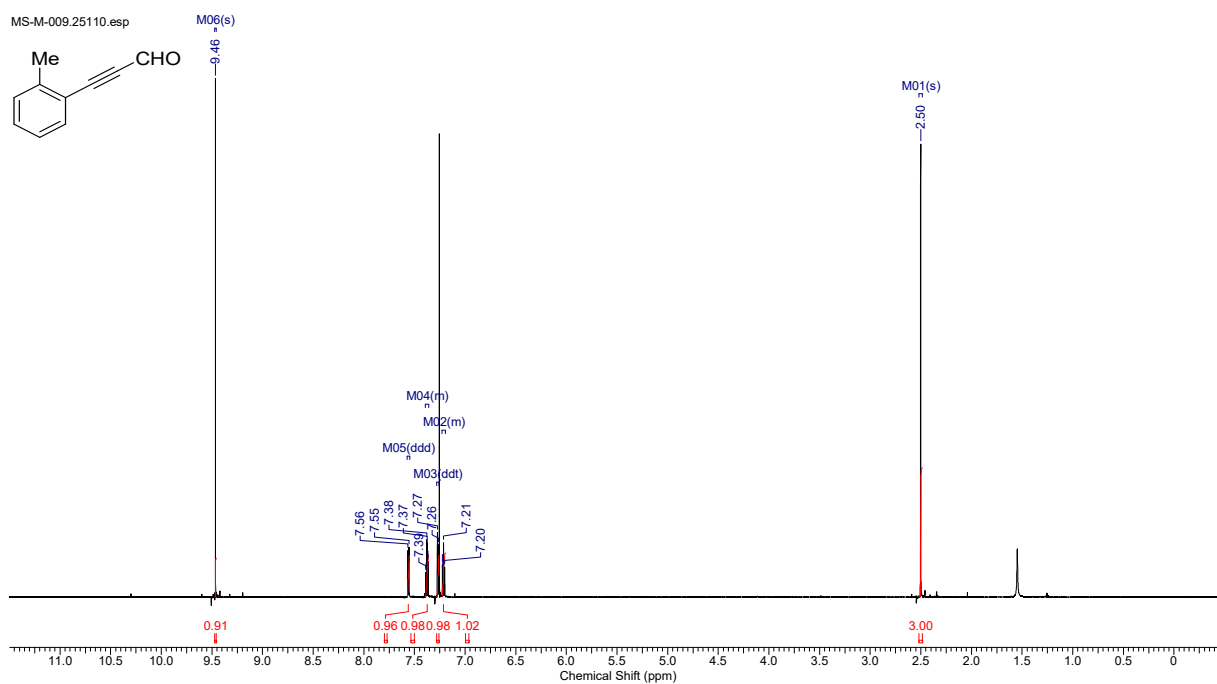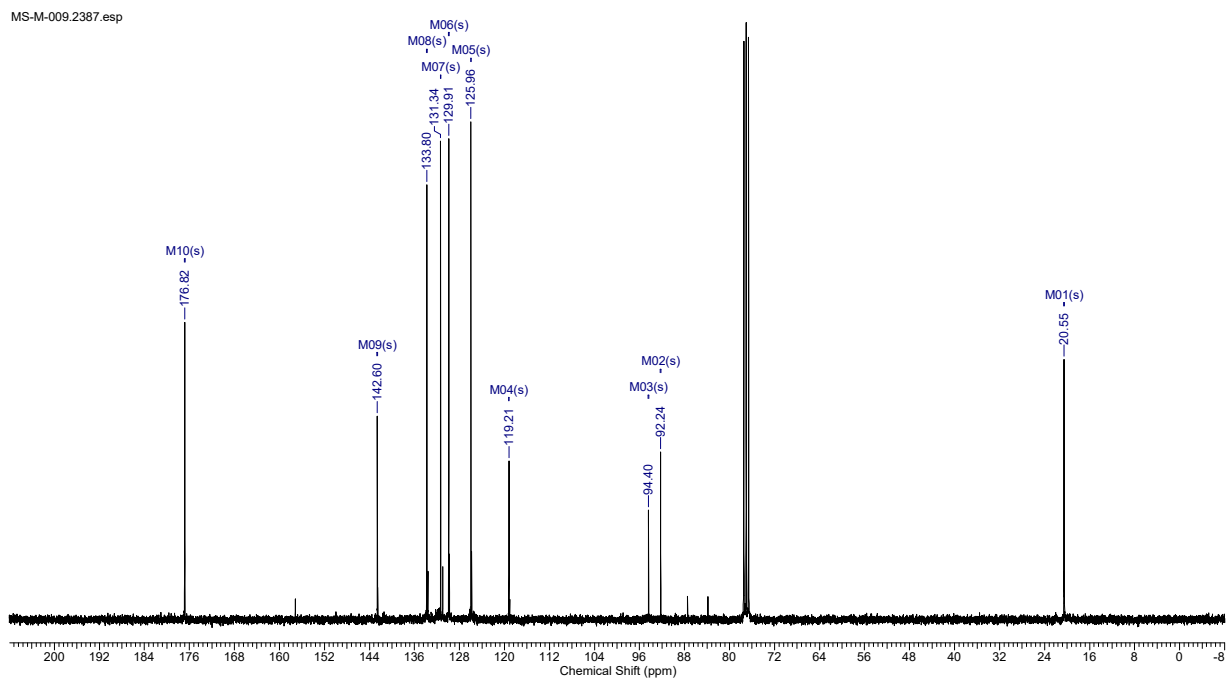

Figure S29.  $^1\text{H}$  and  $^{13}\text{C}$  NMR spectra of **2j**

MS-M-049.29604.esp

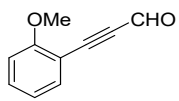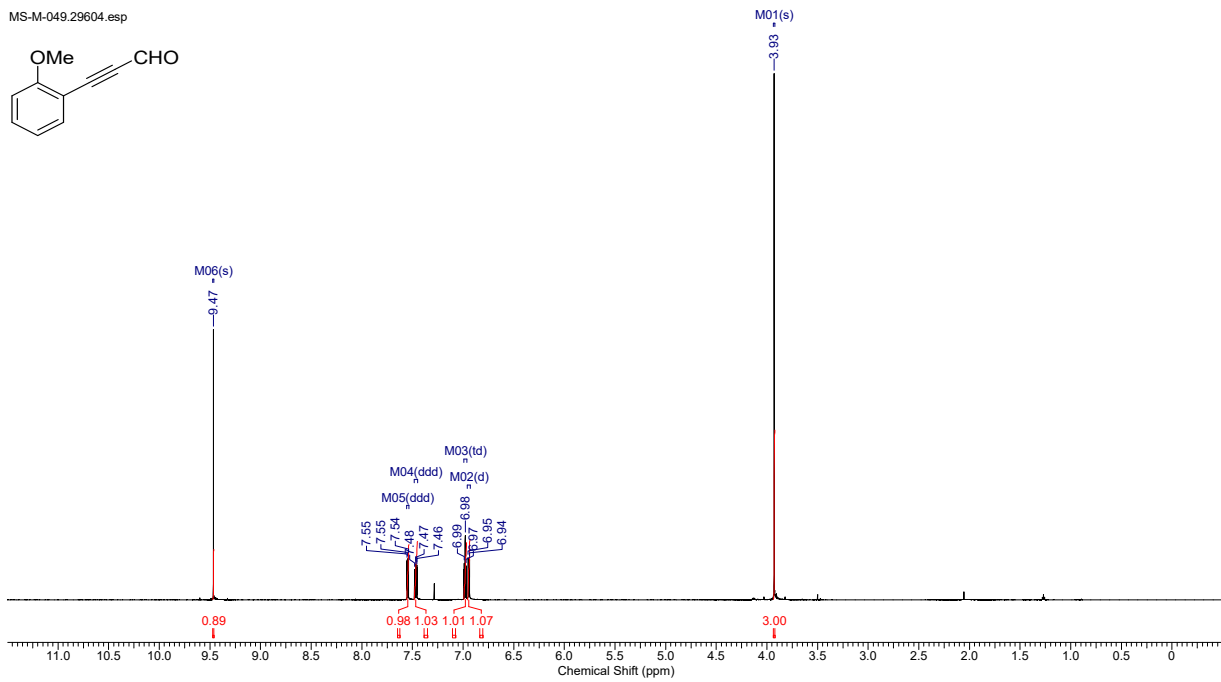

MS-M-049.29607.esp

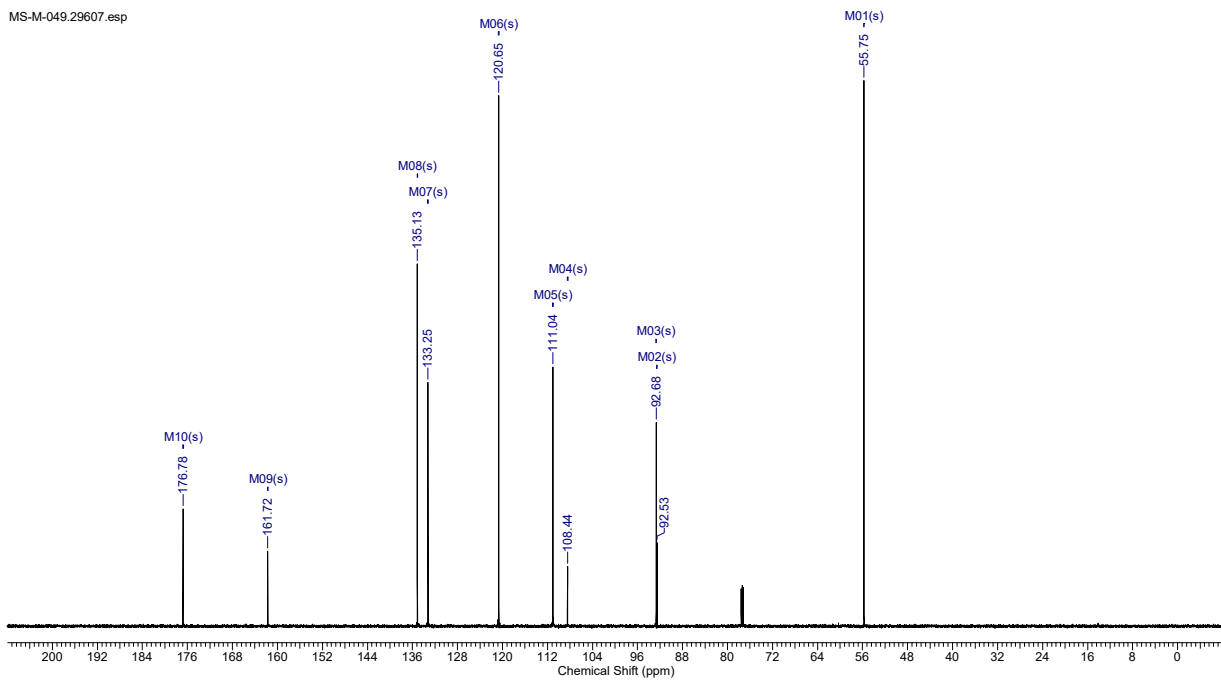

Figure S30. <sup>1</sup>H and <sup>13</sup>C NMR spectra of 2k

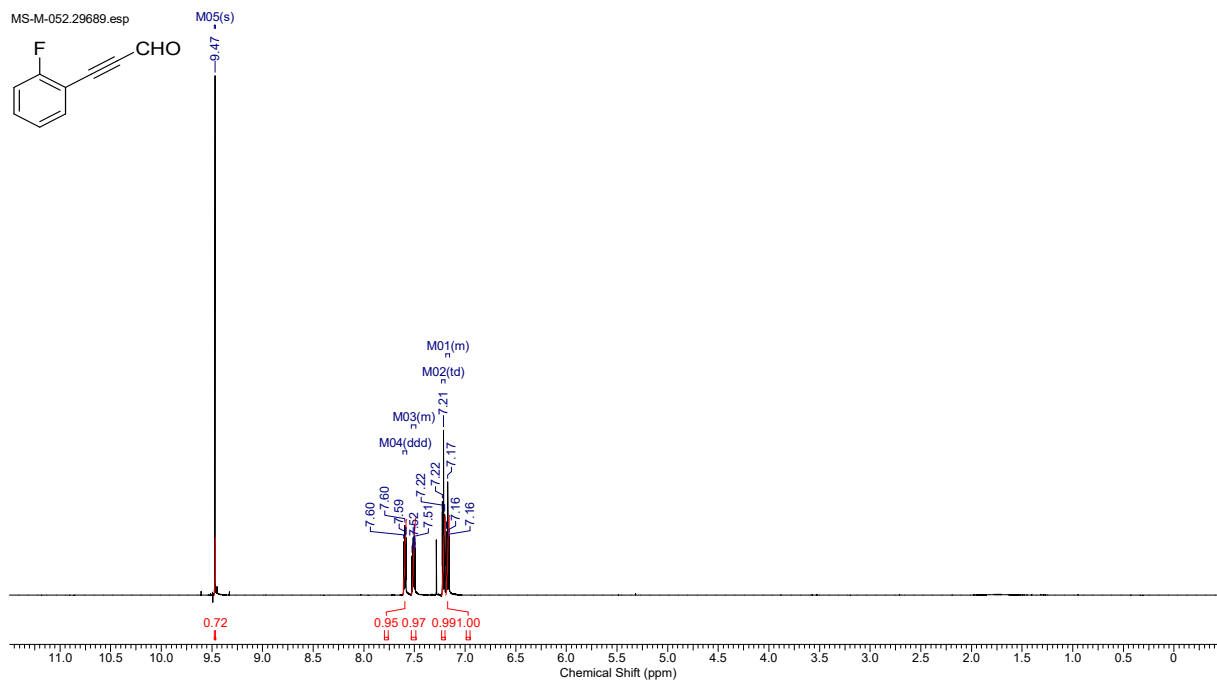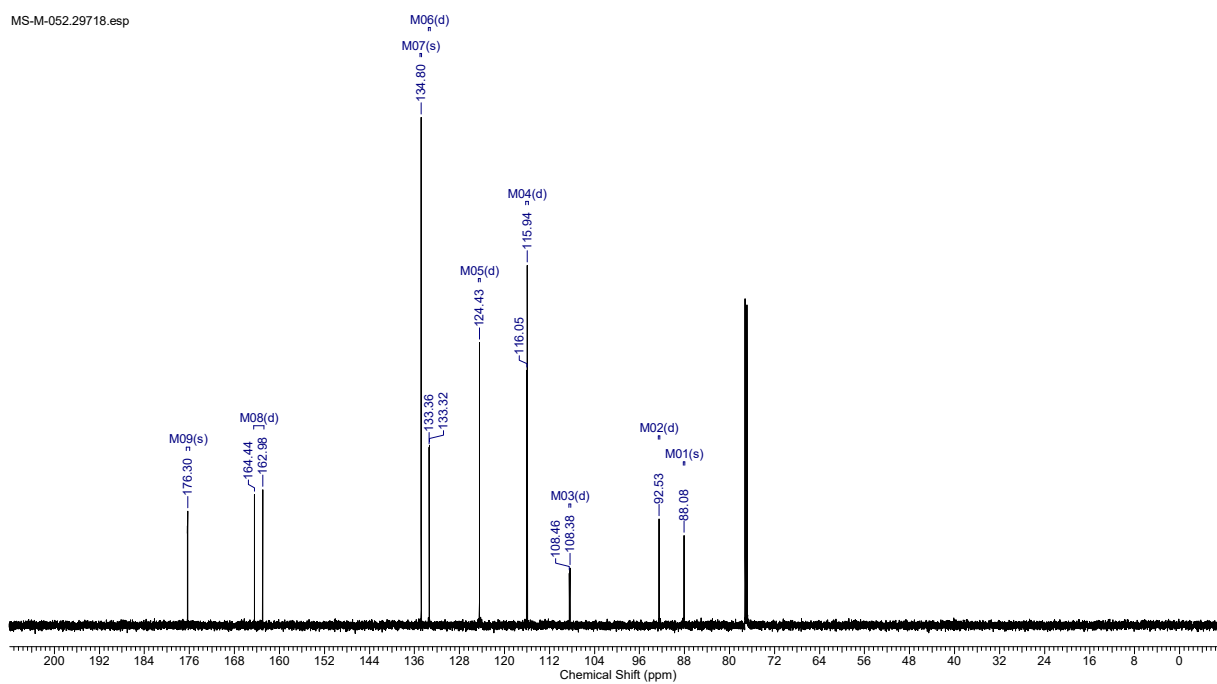

Figure S31.  $^1\text{H}$  and  $^{13}\text{C}$  NMR spectra of 2I

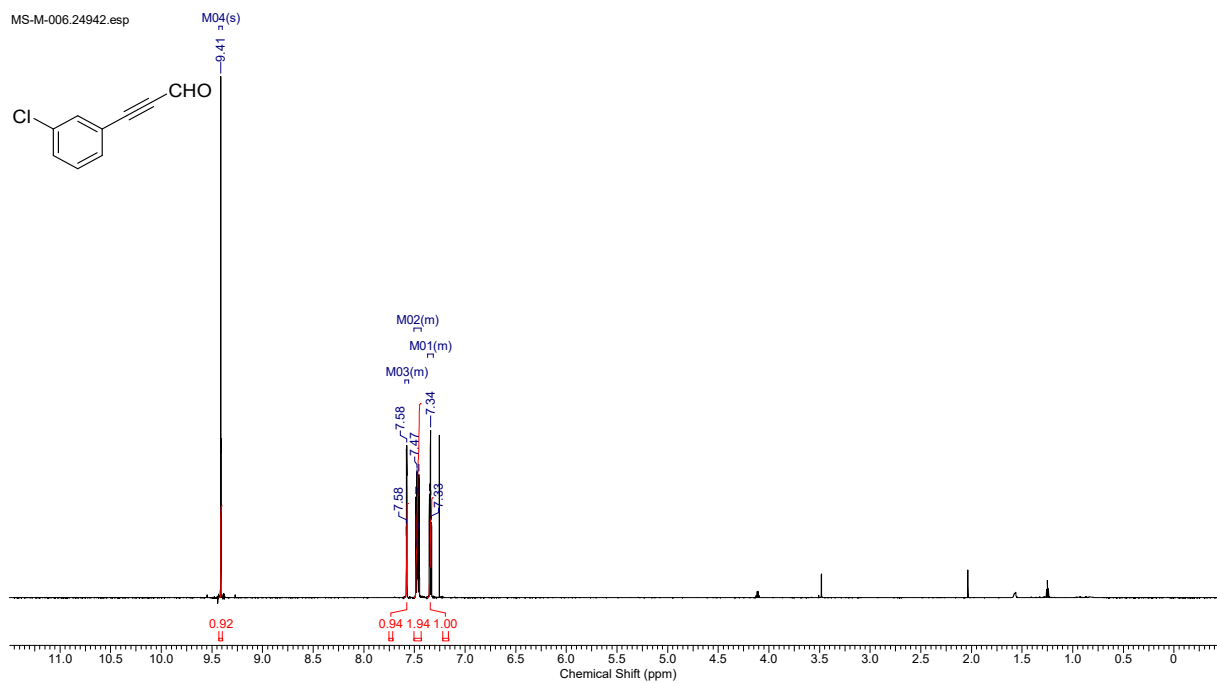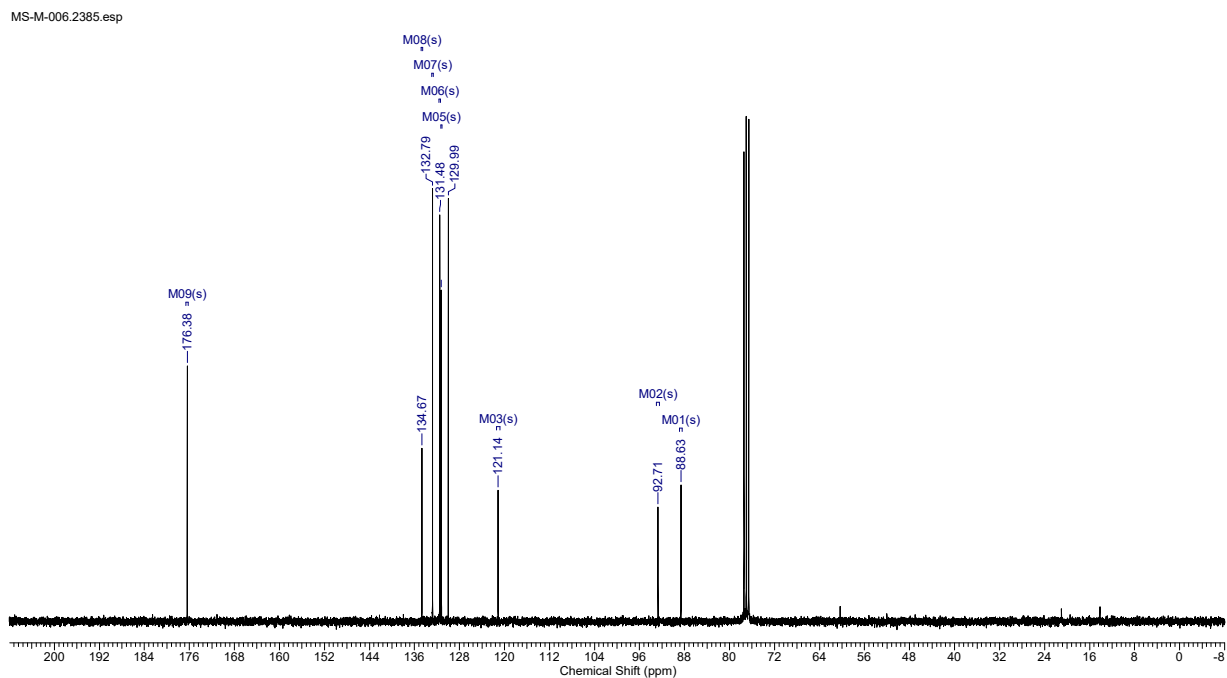

Figure S32.  $^1\text{H}$  and  $^{13}\text{C}$  NMR spectra of **2m**

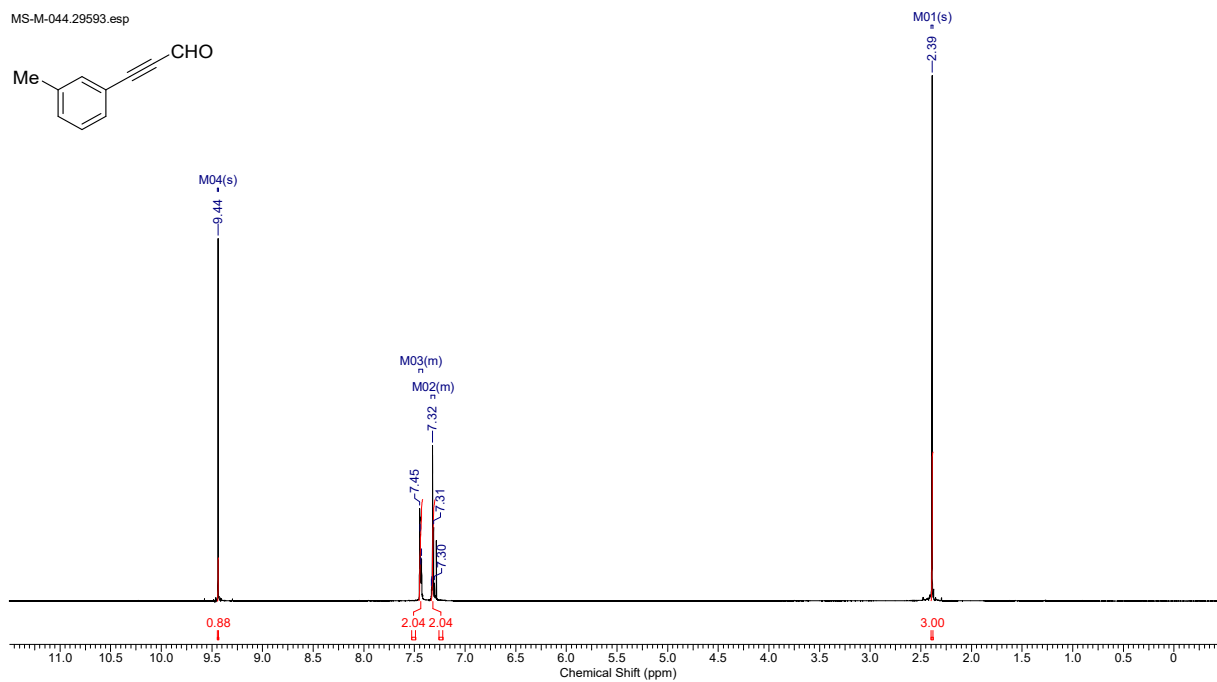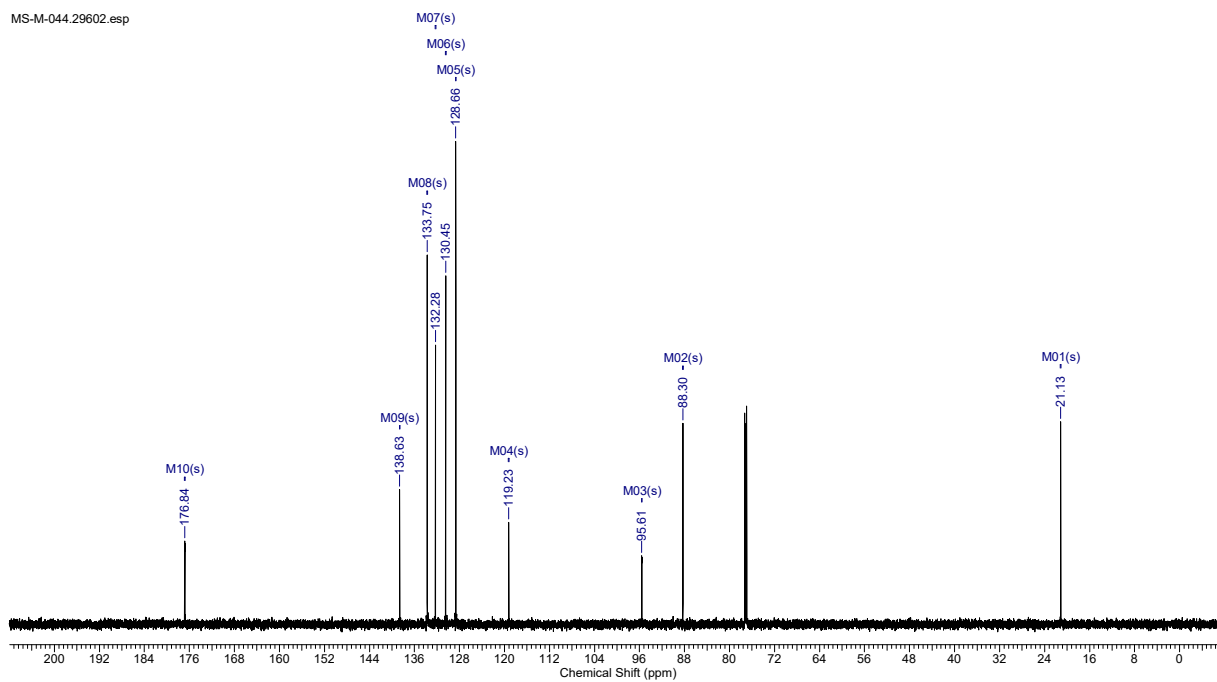

Figure S33. <sup>1</sup>H and <sup>13</sup>C NMR spectra of **2n**

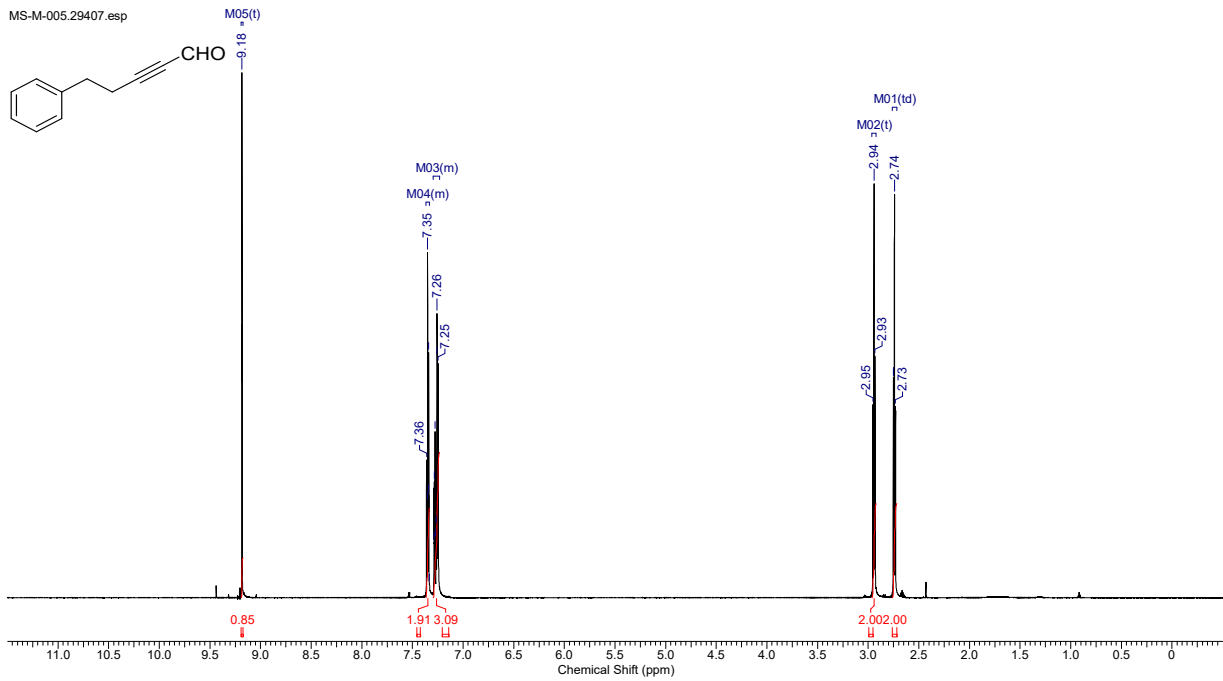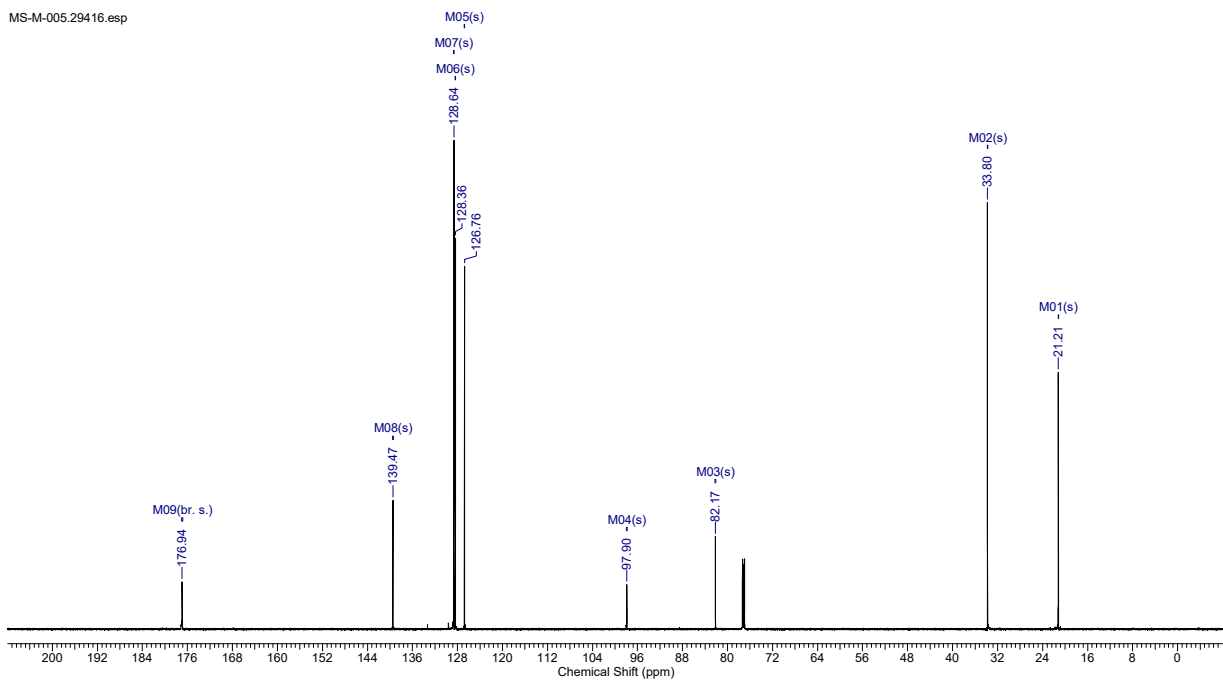

Figure S34. <sup>1</sup>H and <sup>13</sup>C NMR spectra of **2o**

KDD485.27930.esp

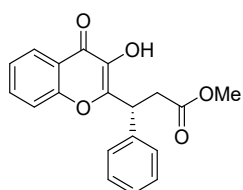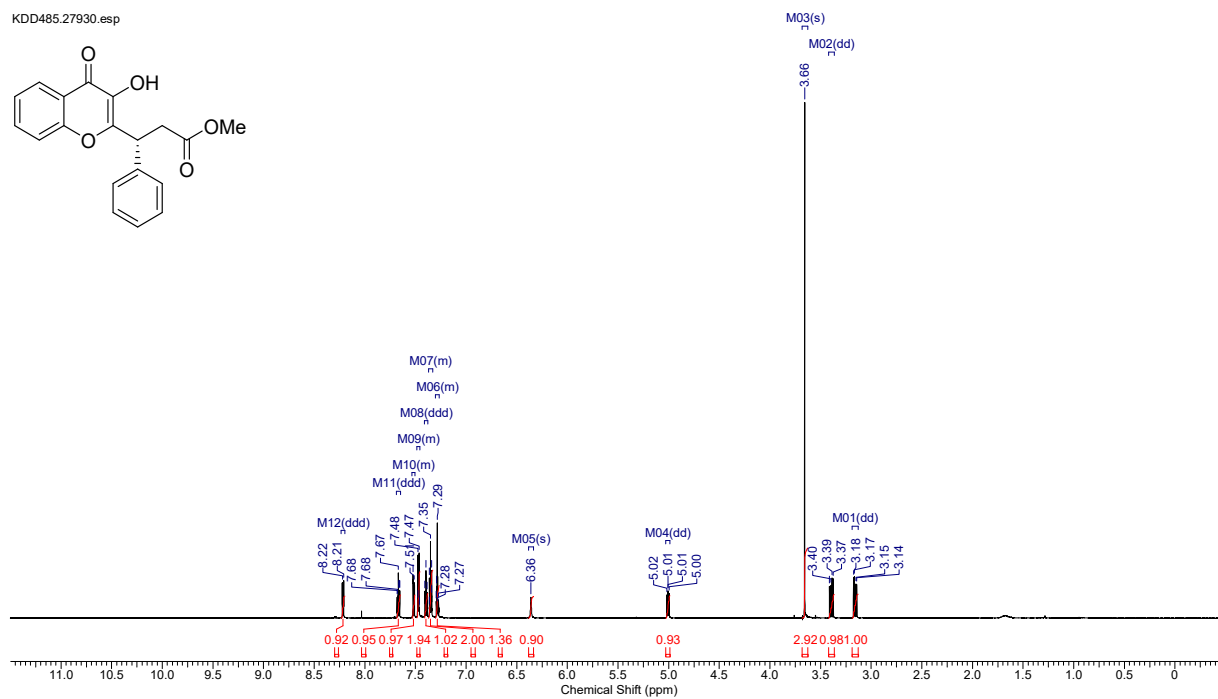

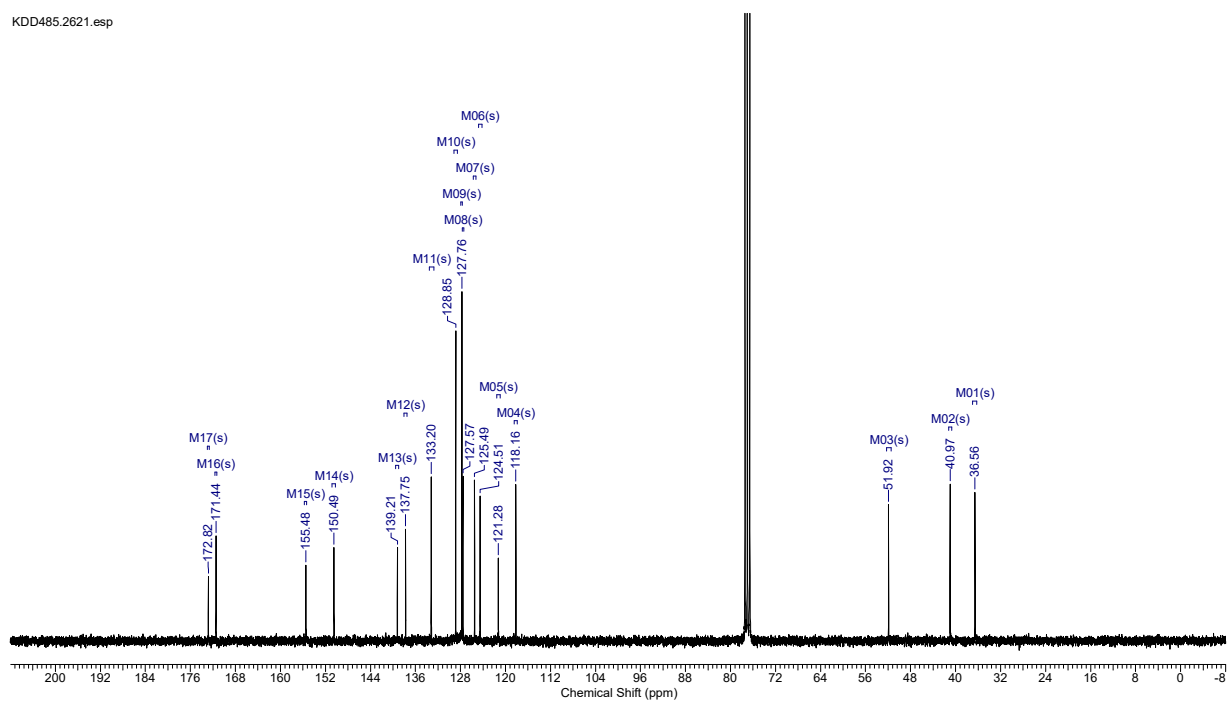Figure S35.  $^1\text{H}$  and  $^{13}\text{C}$  NMR spectra of **3aaa**



KDD501.27757.esp

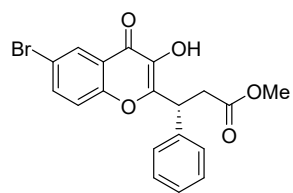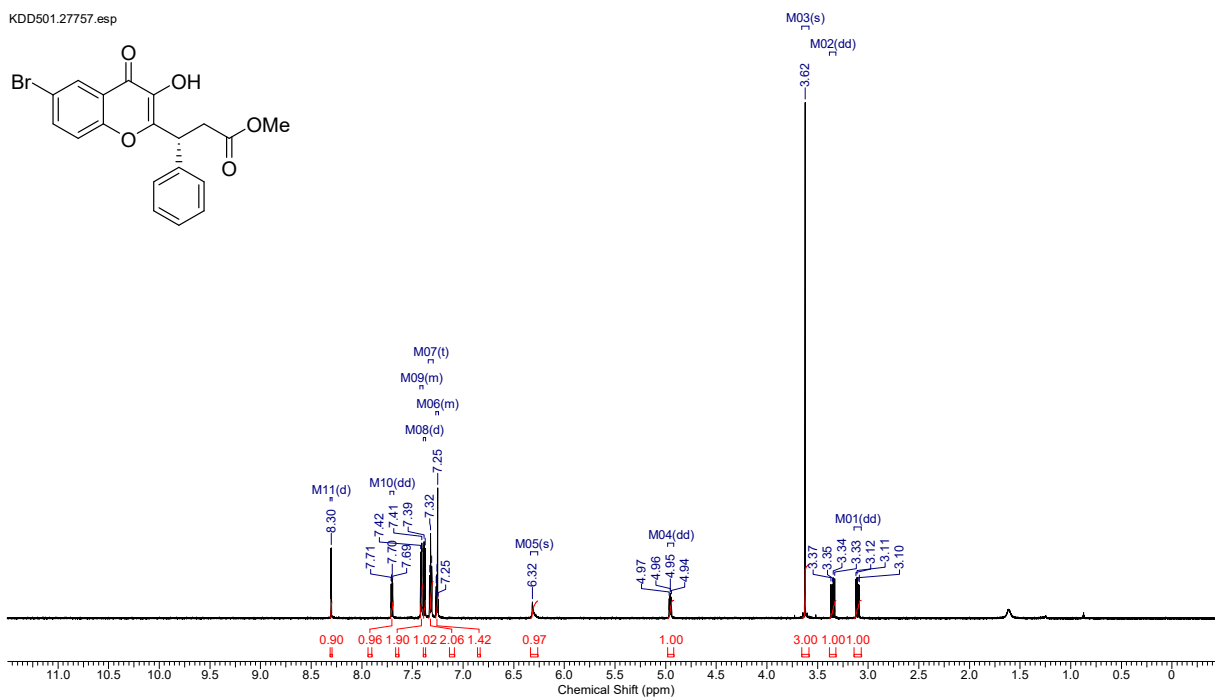

KDD501.27759.esp

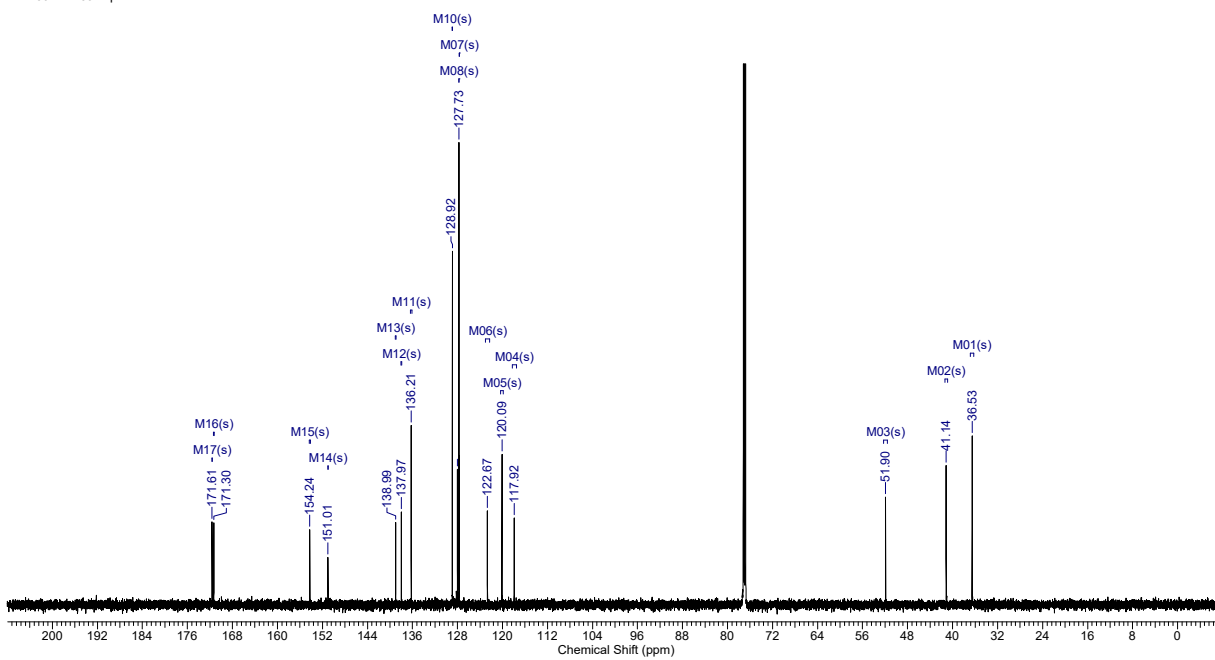

Figure S36.  $^1\text{H}$  and  $^{13}\text{C}$  NMR spectra of **3baa**

KDD503.26301.esp

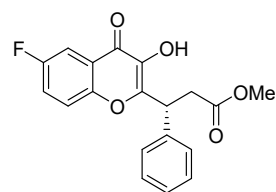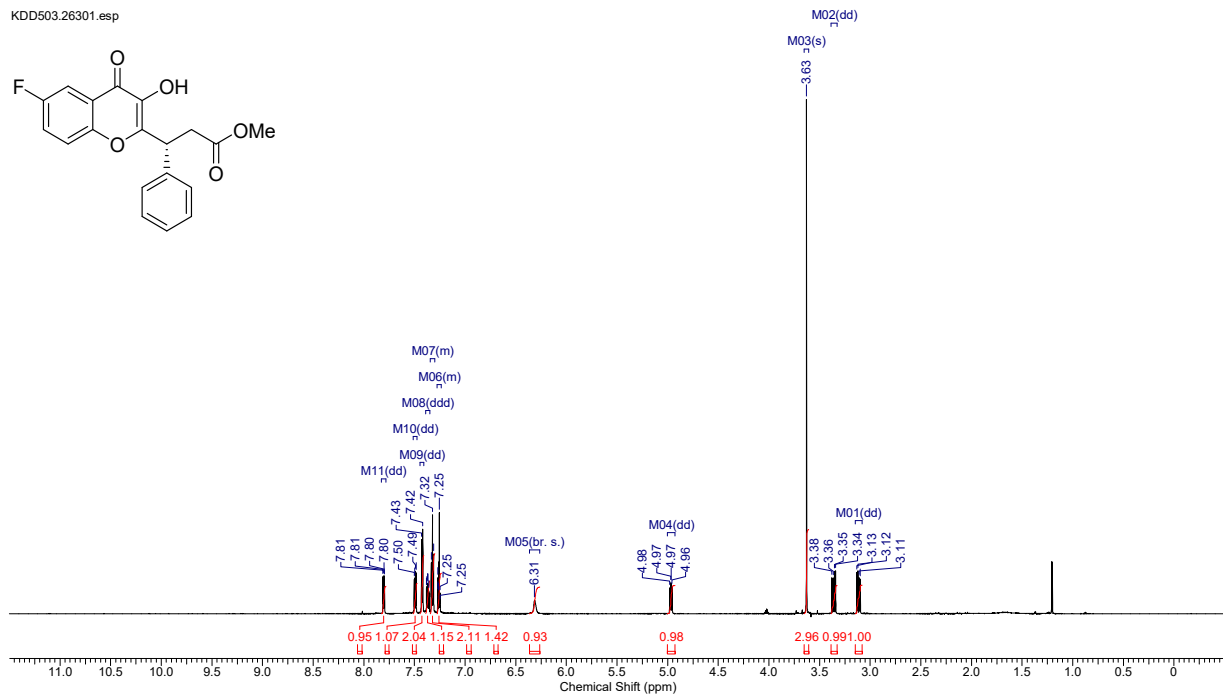

KDD503.26601.esp

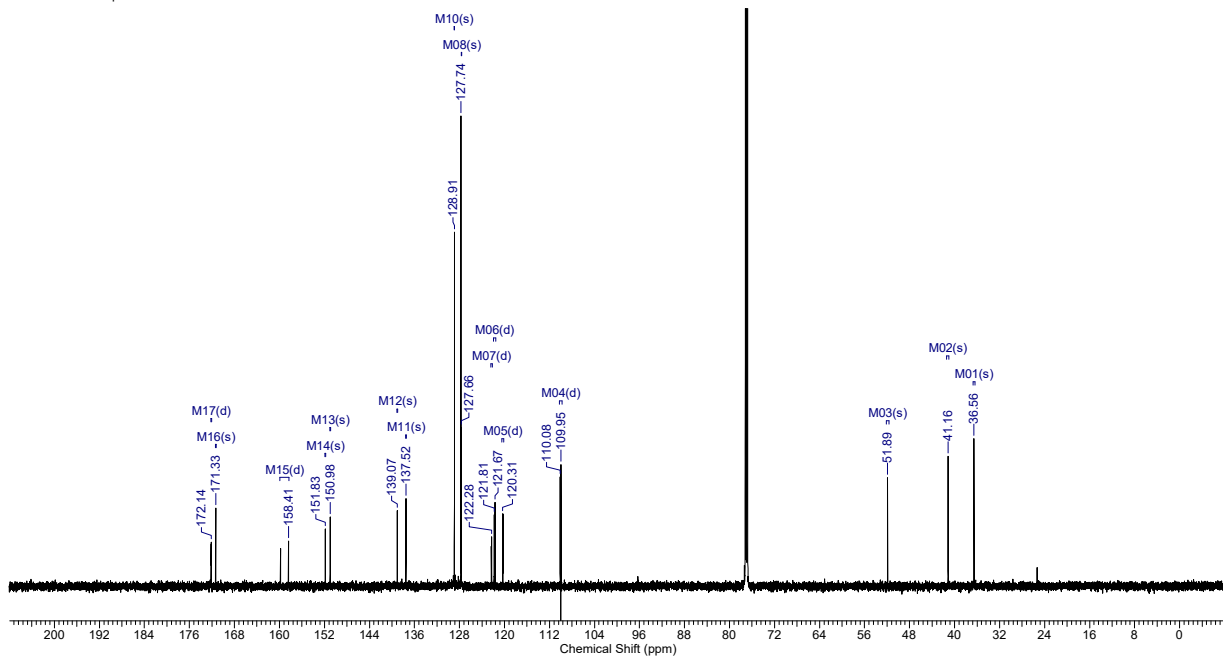

Figure S37. <sup>1</sup>H and <sup>13</sup>C NMR spectra of 3caa

KDD513.27590.esp

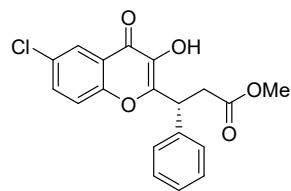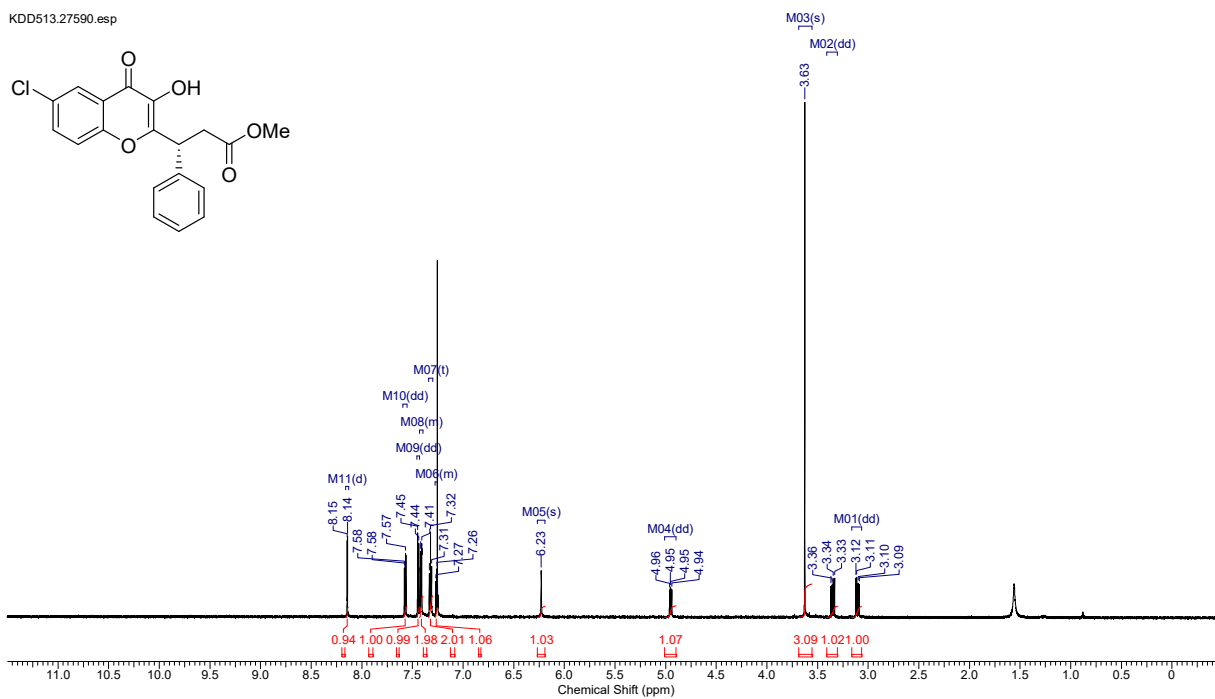

KDD513.27600.esp

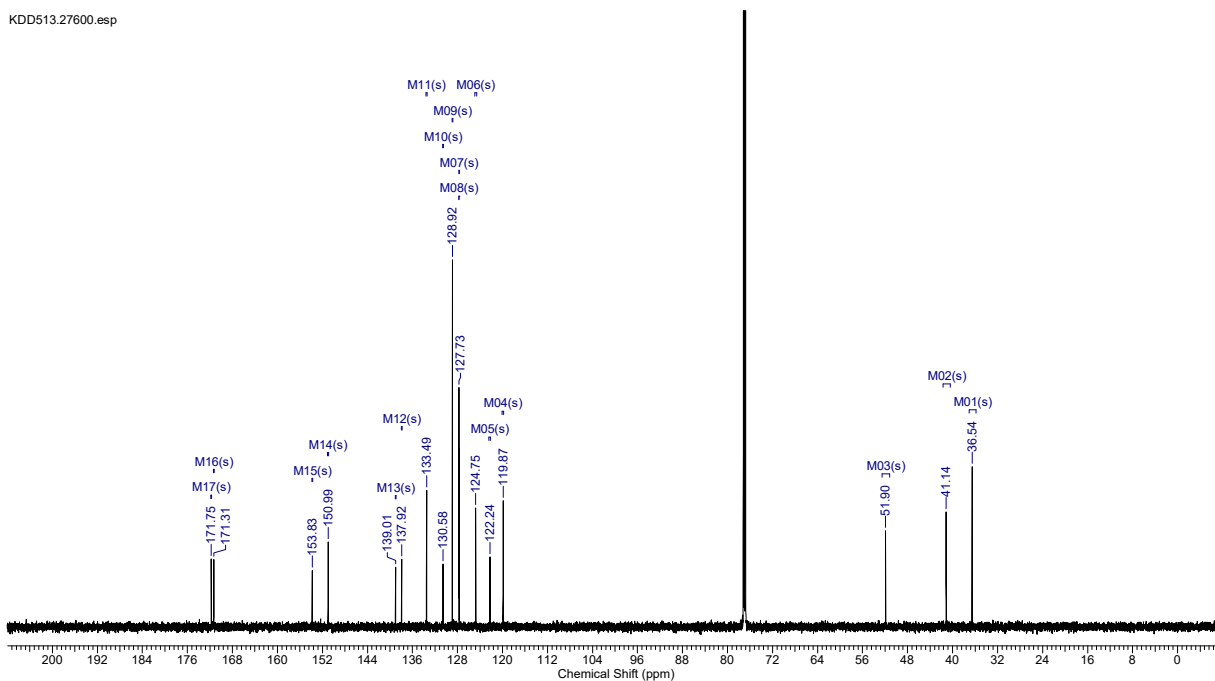

Figure S38. <sup>1</sup>H and <sup>13</sup>C NMR spectra of **3daa**

KDD497.27611.esp

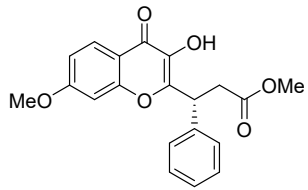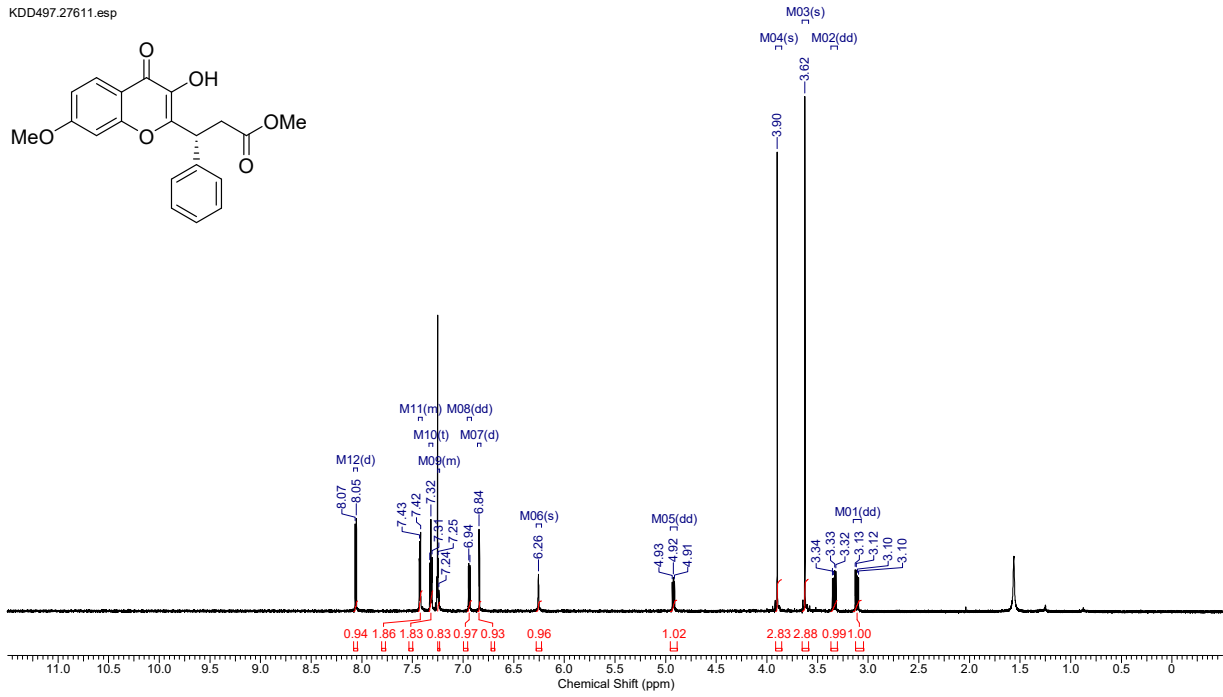

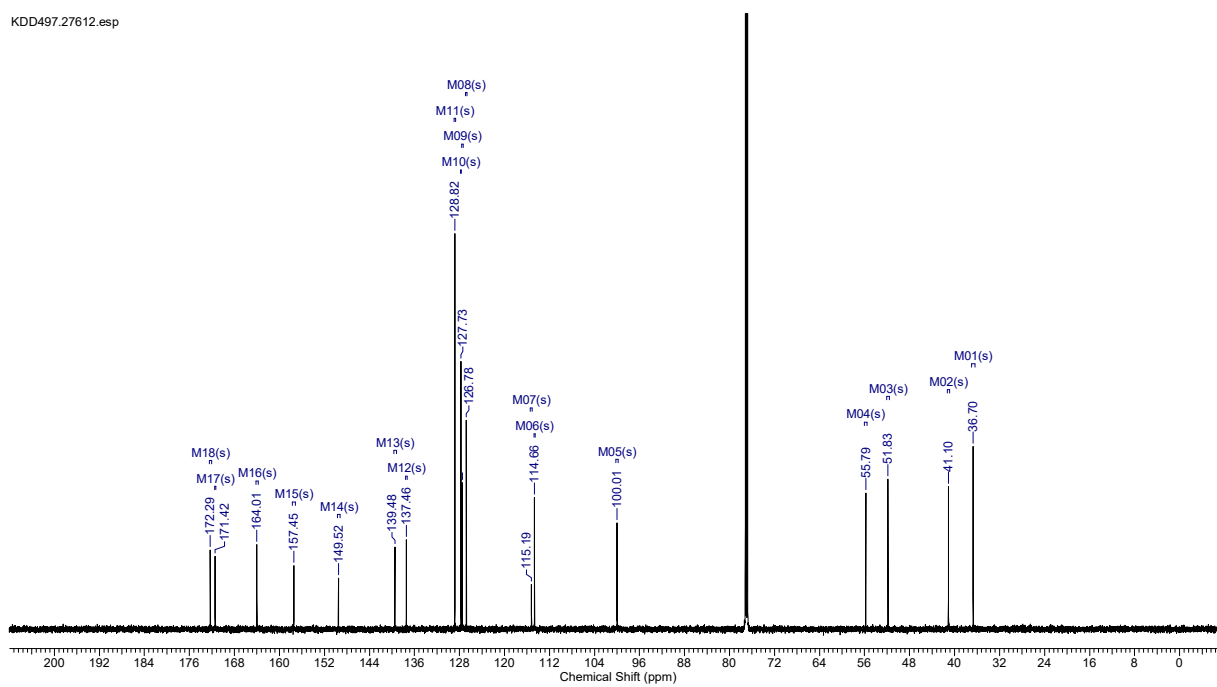Figure S39.  $^1\text{H}$  and  $^{13}\text{C}$  NMR spectra of 3ea

KDD499.27740.esp

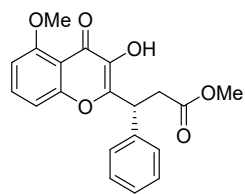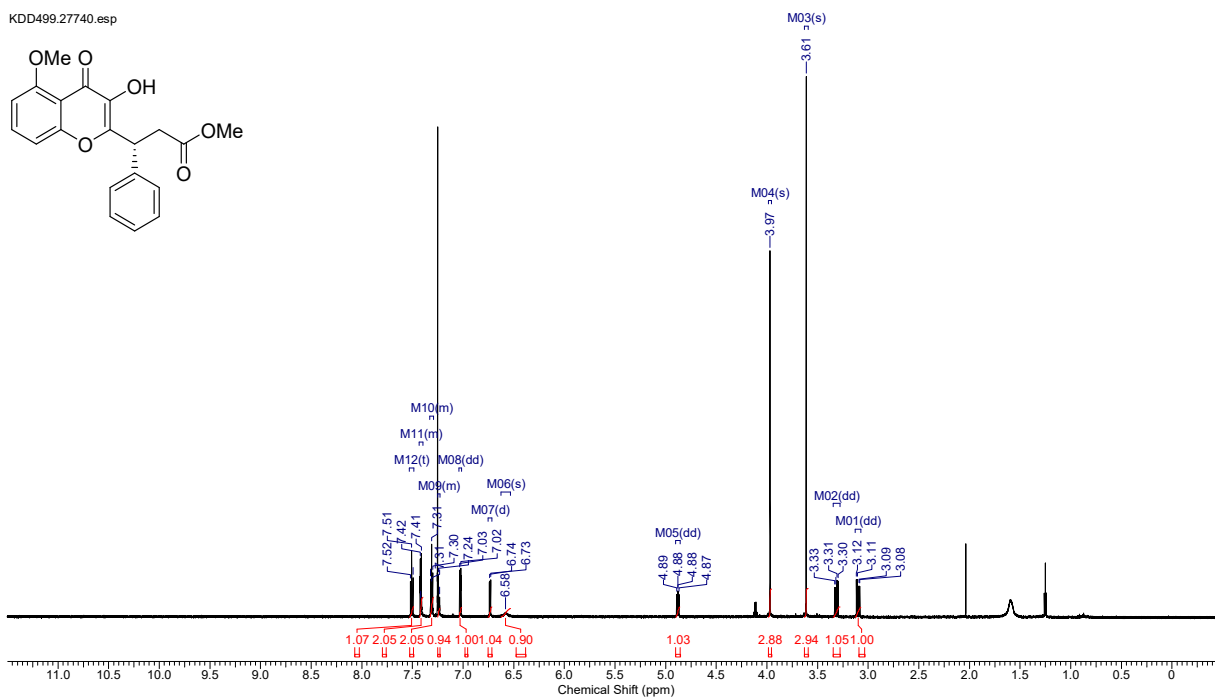

KDD499.2607.esp

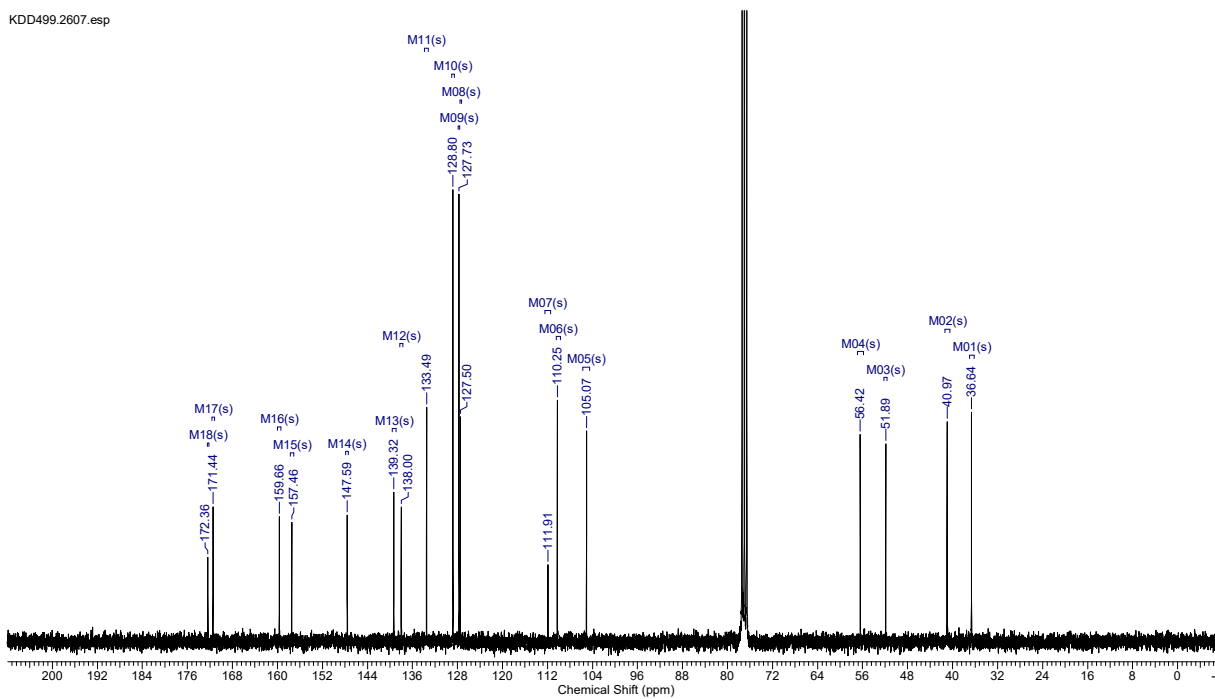

Figure S40. <sup>1</sup>H and <sup>13</sup>C NMR spectra of 3faa

KDD495.27991.esp

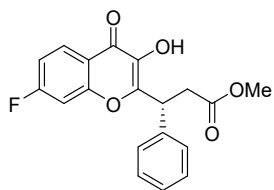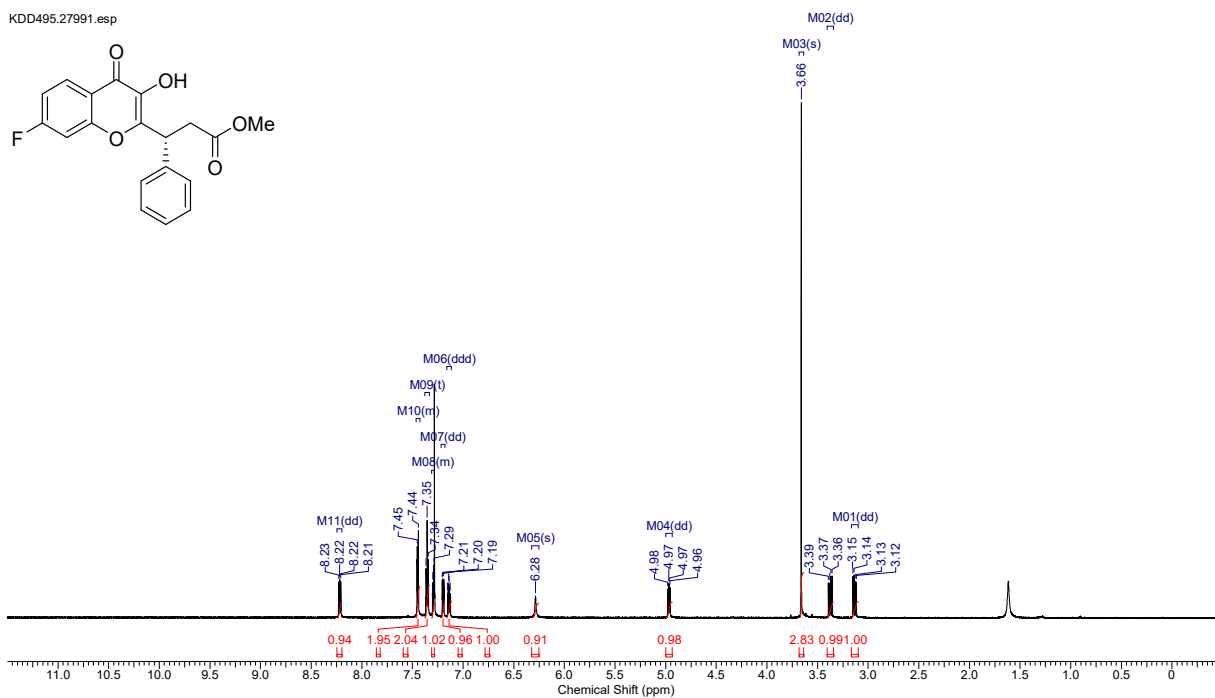

KDD495.2628.esp

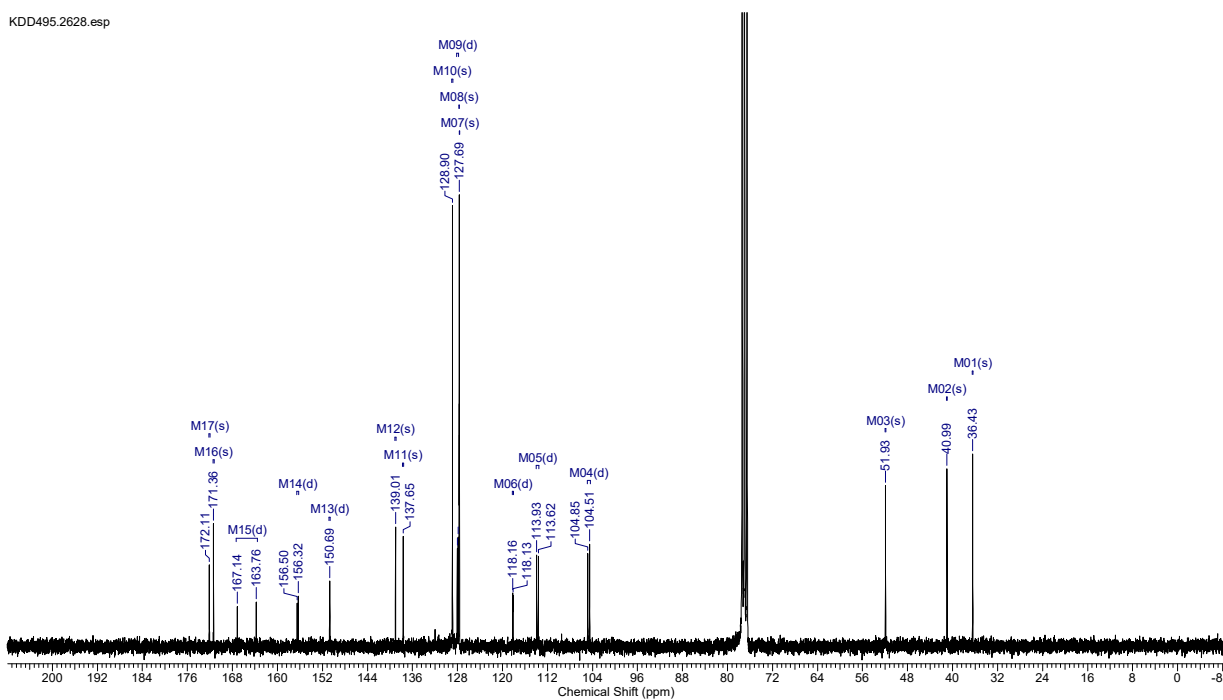

Figure S41.  $^1\text{H}$  and  $^{13}\text{C}$  NMR spectra of **3gaa**

KDD515.27682.esp

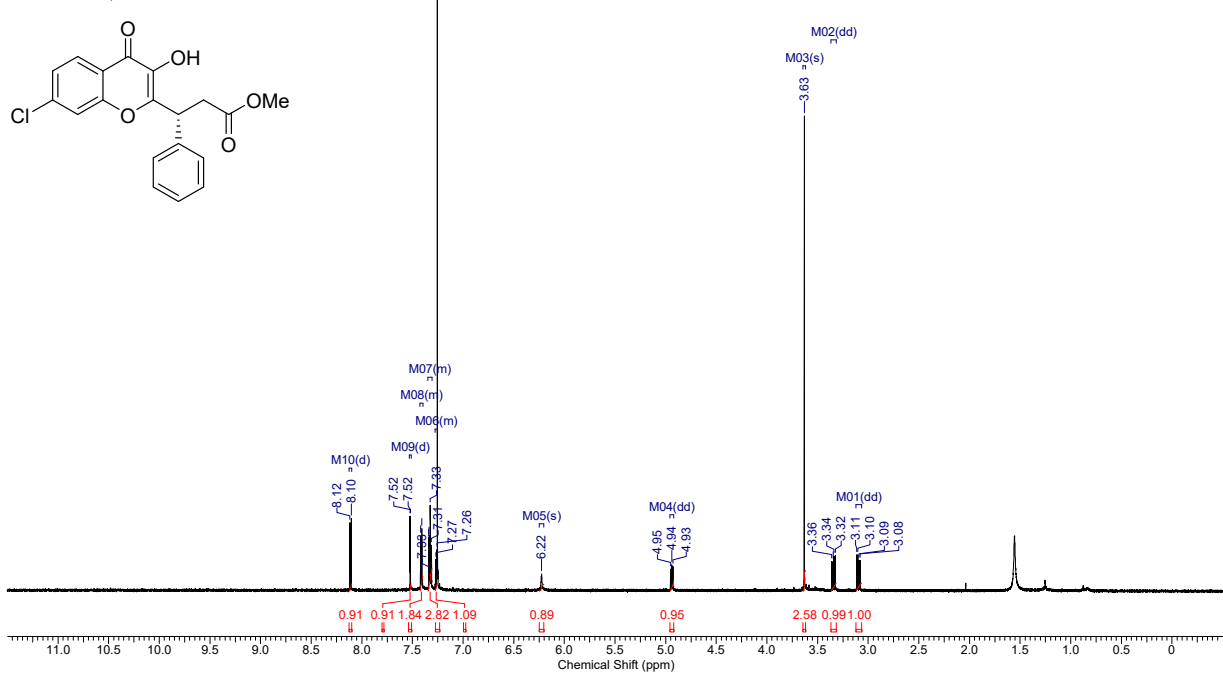

KDD515.2601.esp

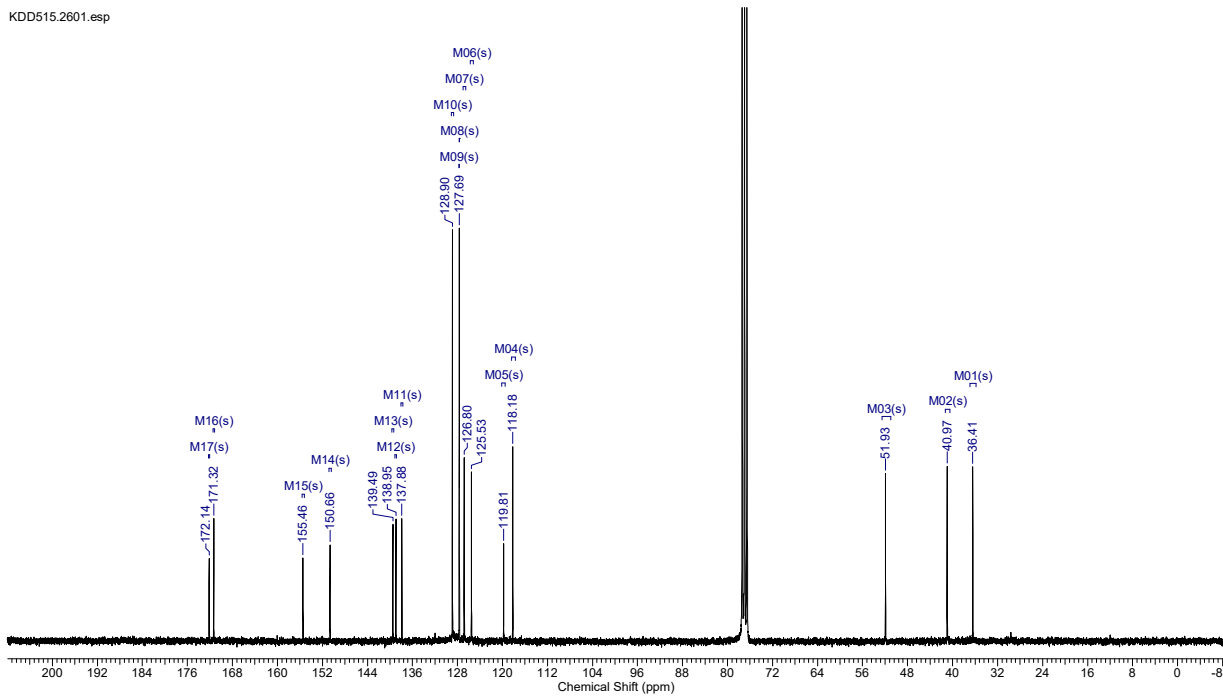

Figure S42. <sup>1</sup>H and <sup>13</sup>C NMR spectra of 3haa



KDD505.27931.esp

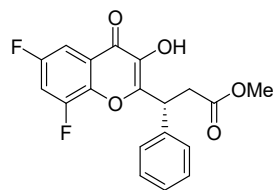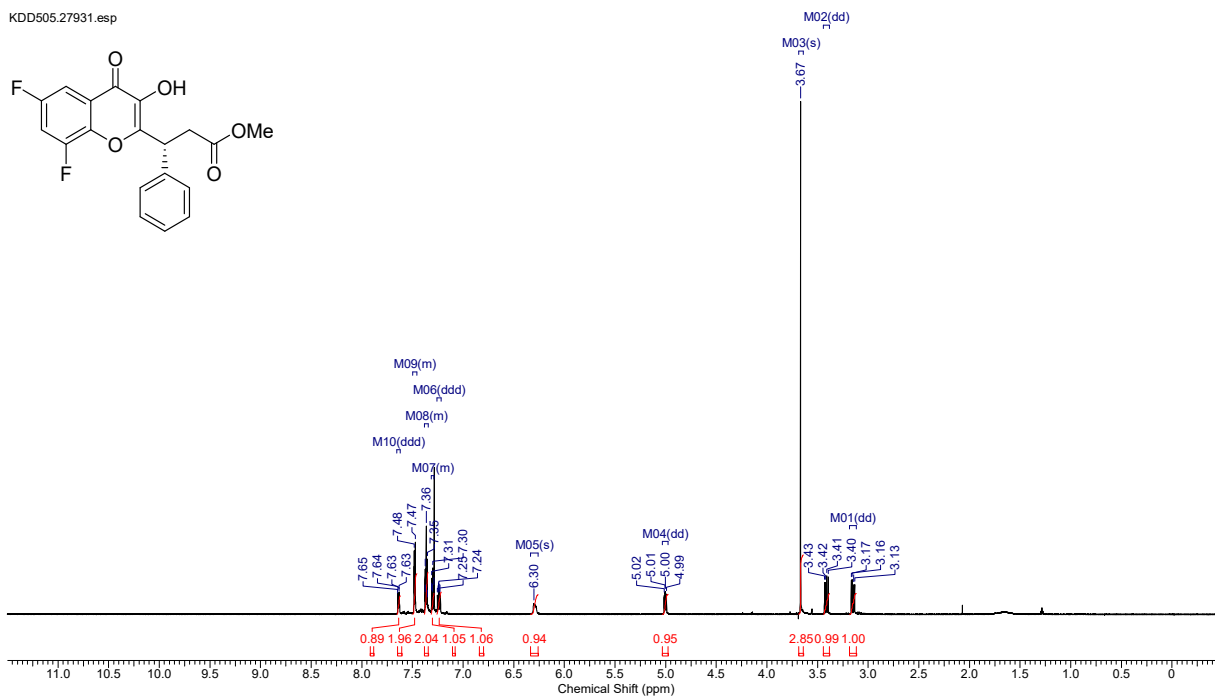

KDD505.2623.esp

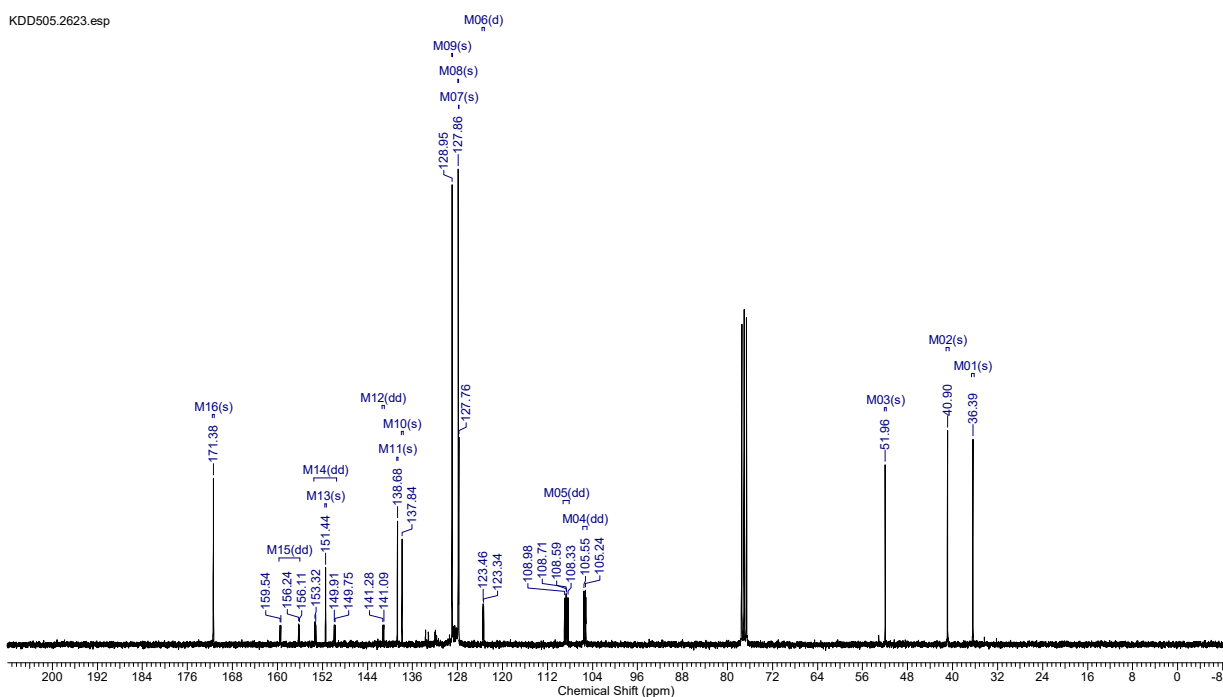

Figure S43.  $^1\text{H}$  and  $^{13}\text{C}$  NMR spectra of **3iaa**

KDD613.29705.esp

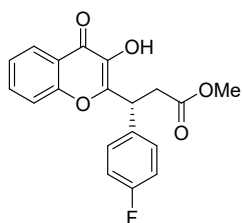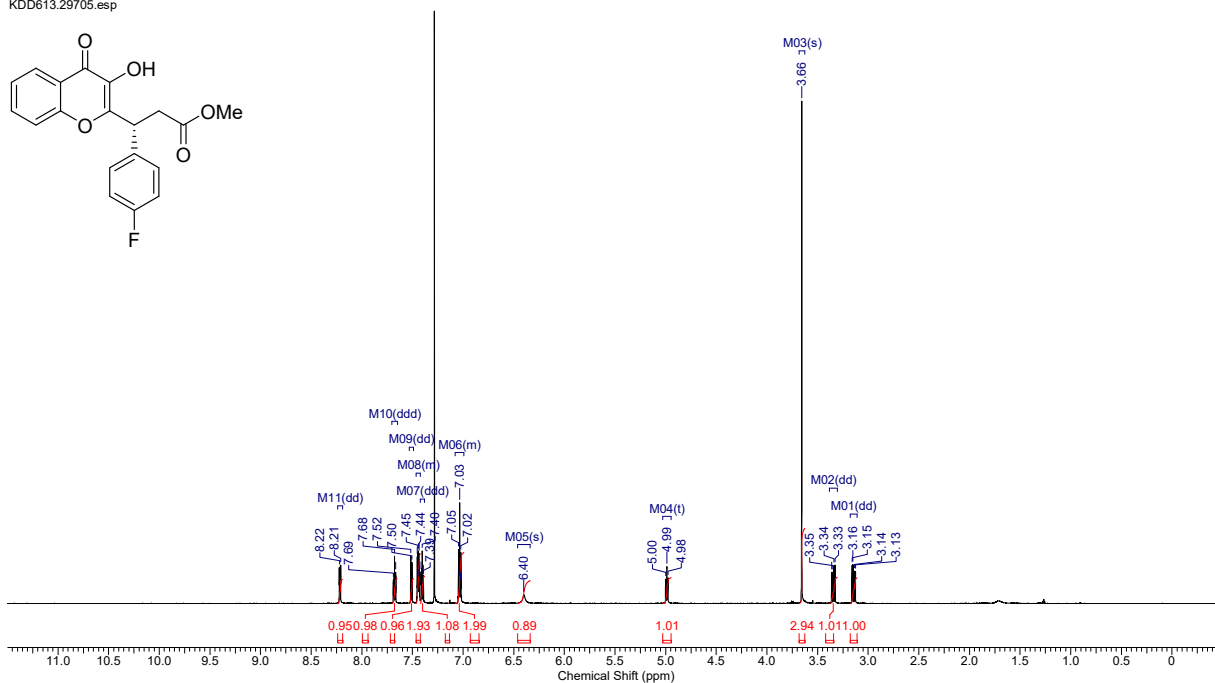

KDD613.29773.esp

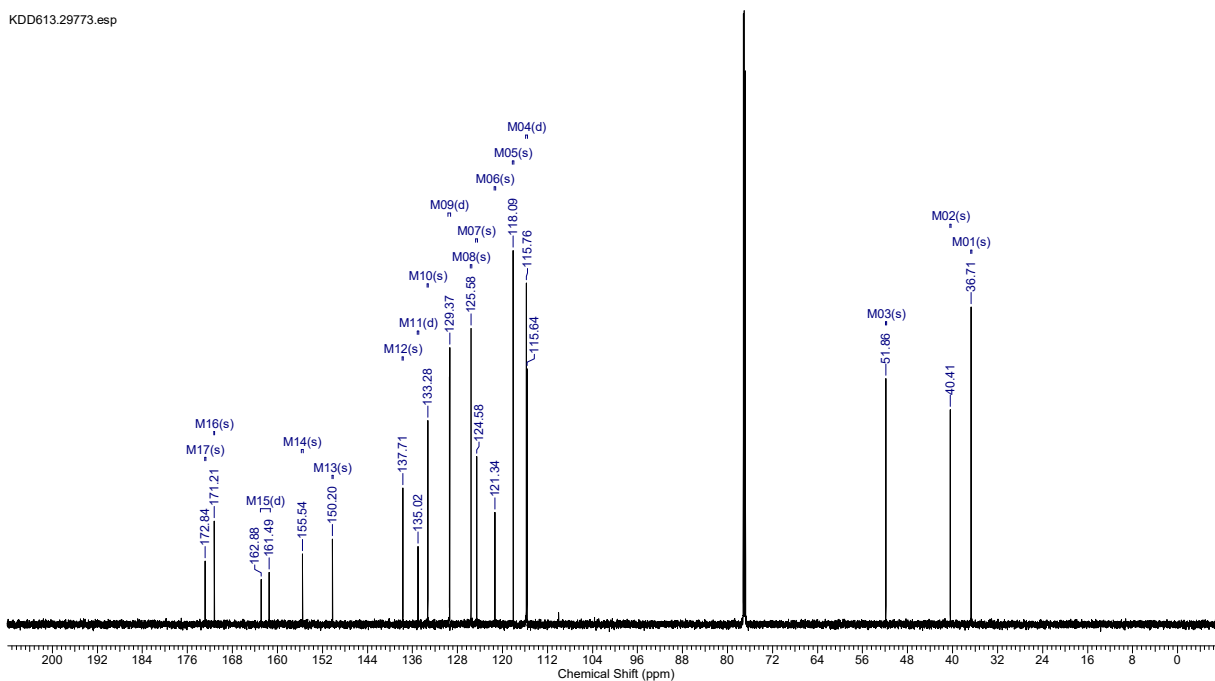

Figure S44. <sup>1</sup>H and <sup>13</sup>C NMR spectra of **3aba**

MS-M-015 | 016.28667.esp

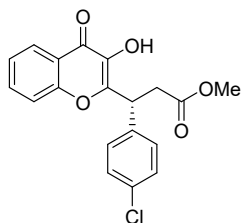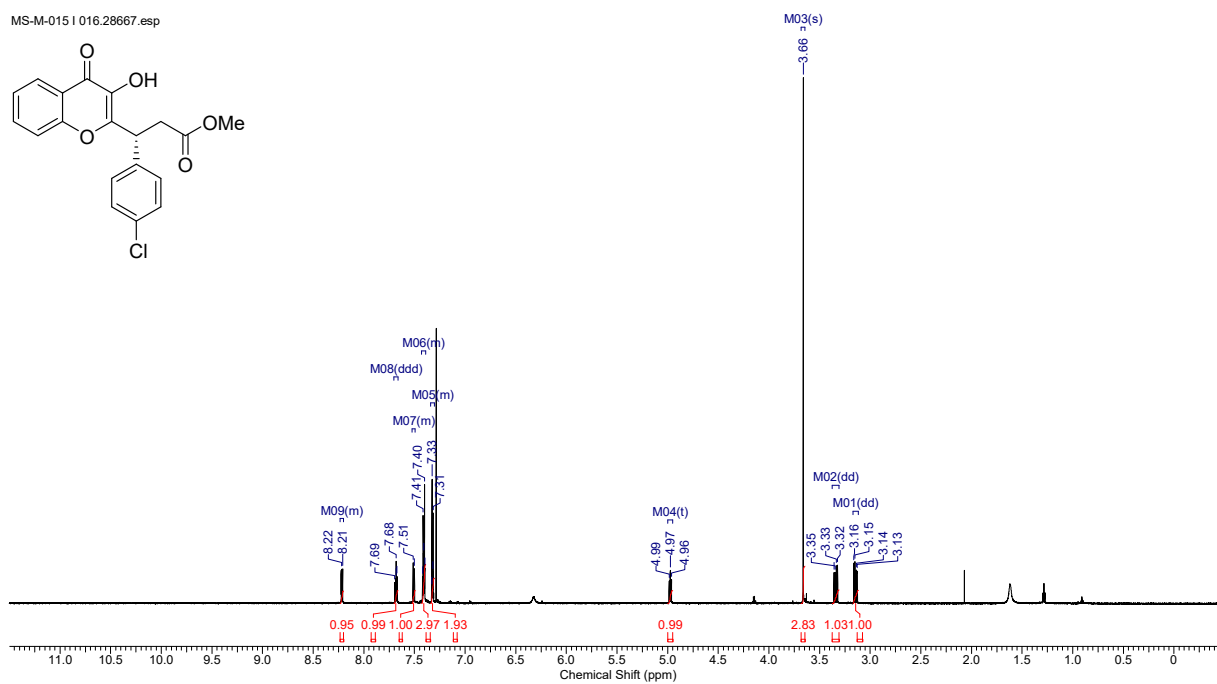

MS-M-015 | 016.28674.esp

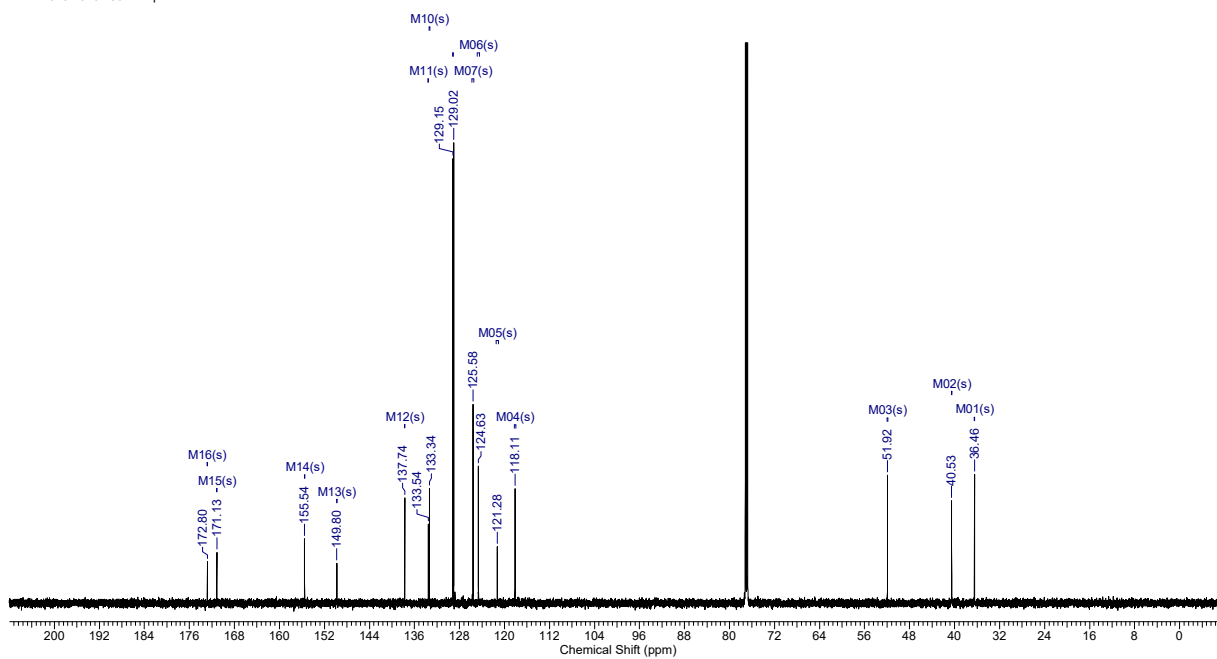

Figure S45. <sup>1</sup>H and <sup>13</sup>C NMR spectra of 3aca

MS-M-071 | 072.30494.esp

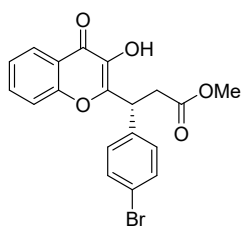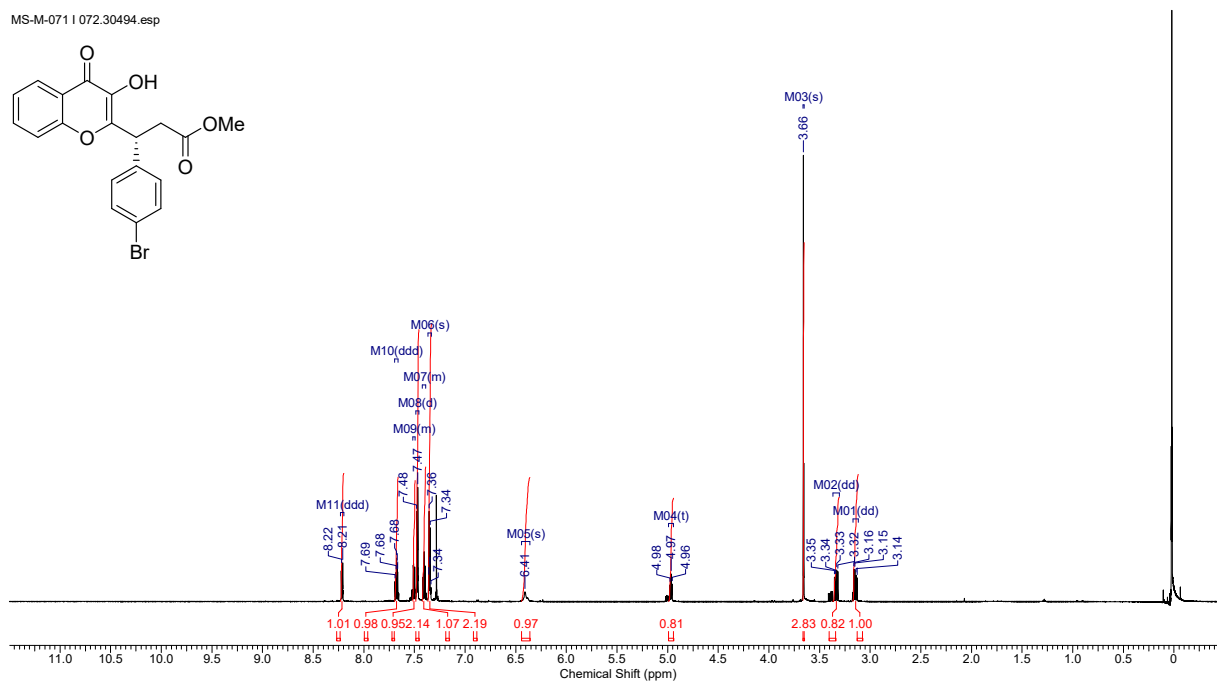

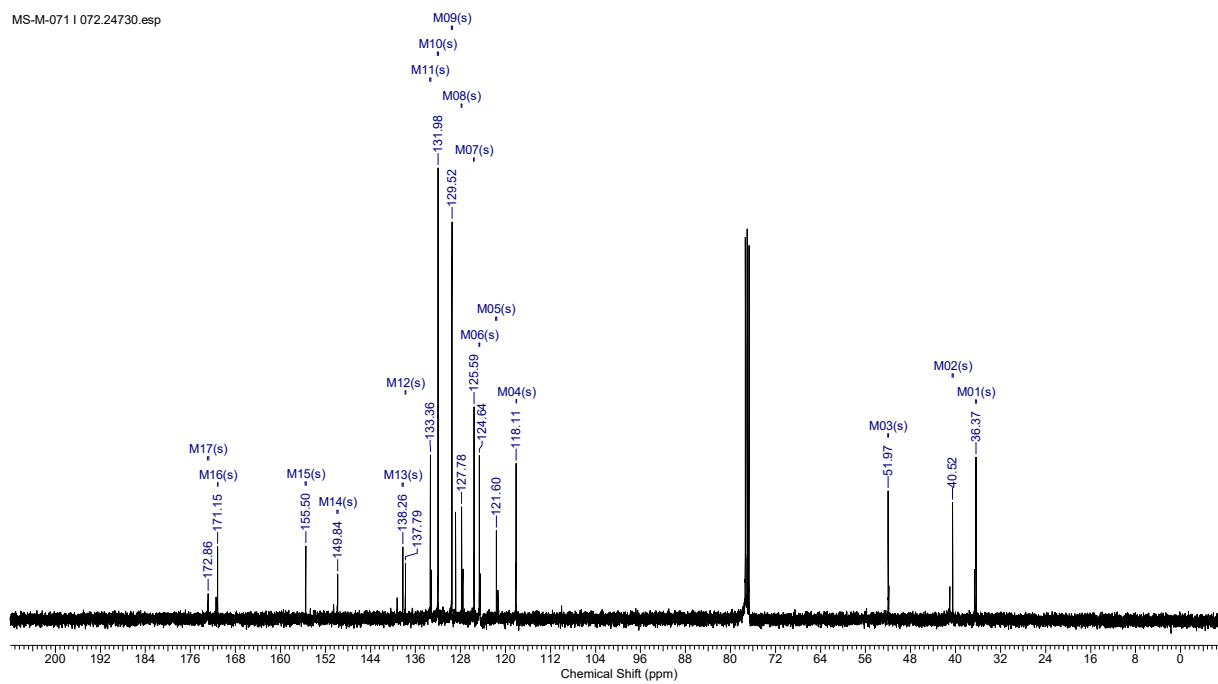

Figure S46.  $^1\text{H}$  and  $^{13}\text{C}$  NMR spectra of **3ada**

KDD611.29638.esp

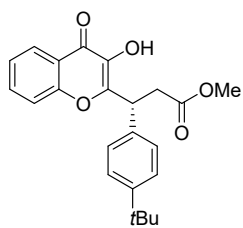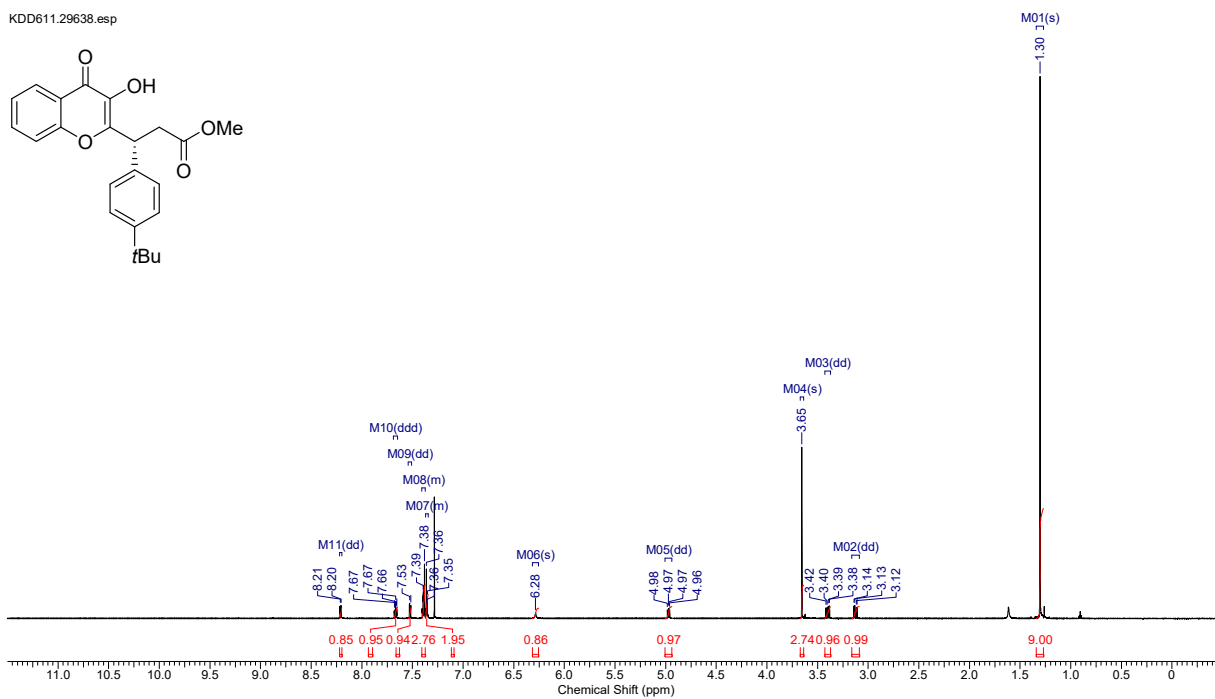

KDD611.29772.esp

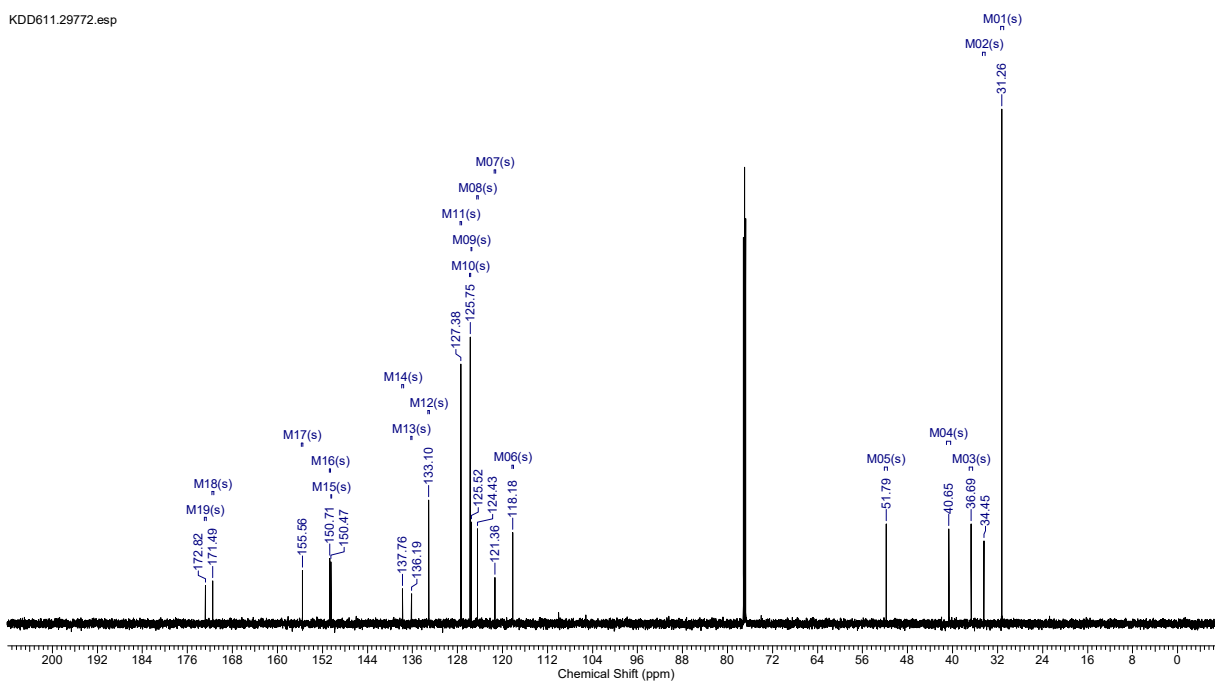

Figure S47. <sup>1</sup>H and <sup>13</sup>C NMR spectra of 3aea

MS-M-017 | 018.28299.esp

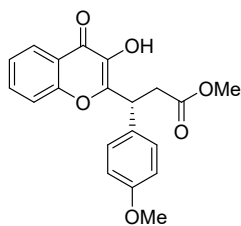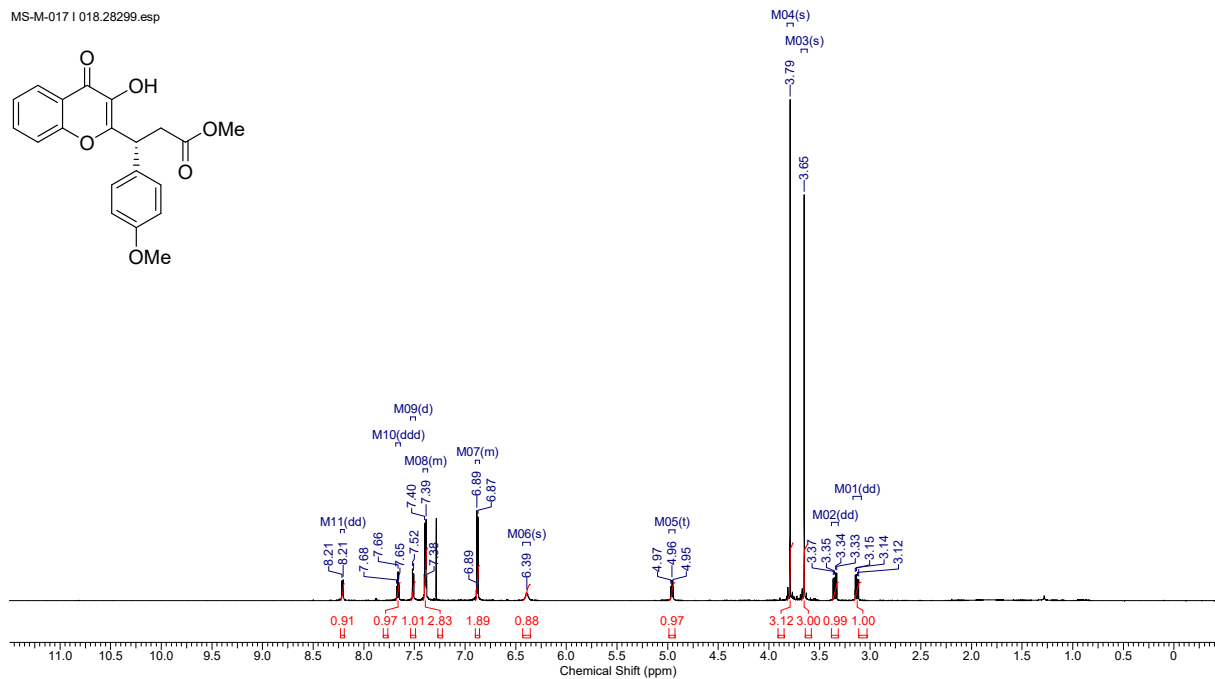

MS-M-017 | 018.28300.esp

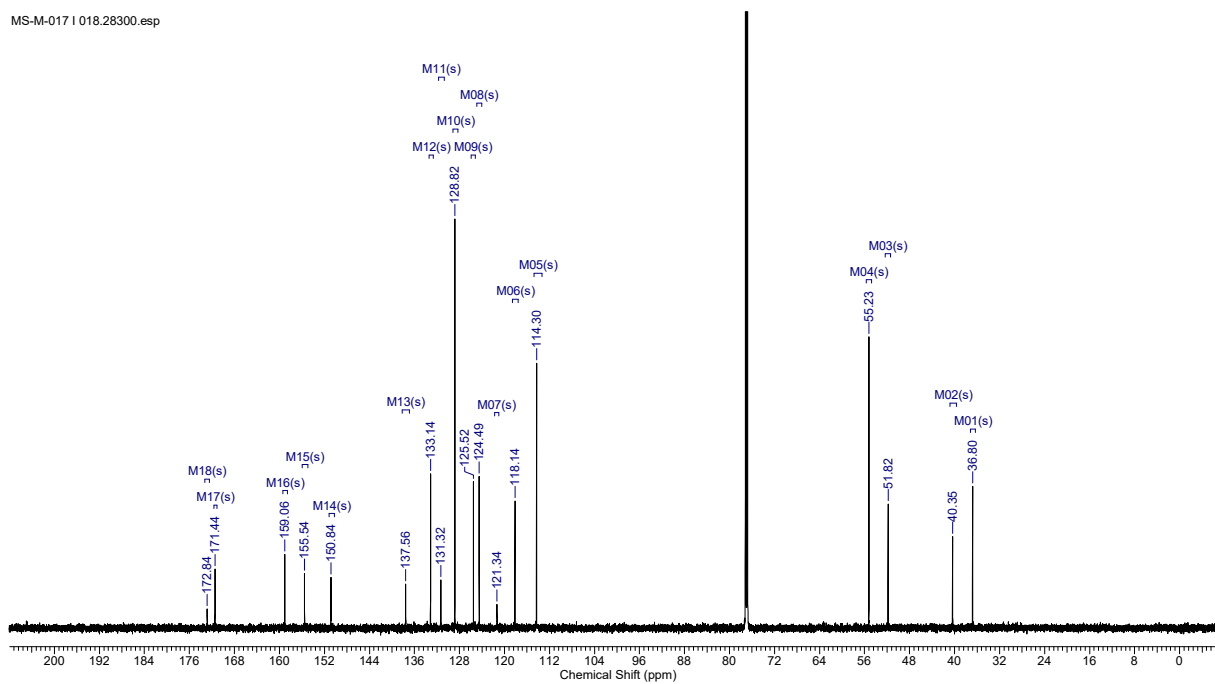

Figure S48. <sup>1</sup>H and <sup>13</sup>C NMR spectra of 3afa

MS-M-059 | 060.30312.esp

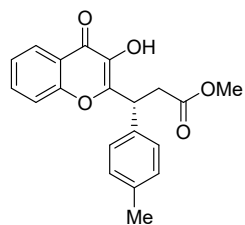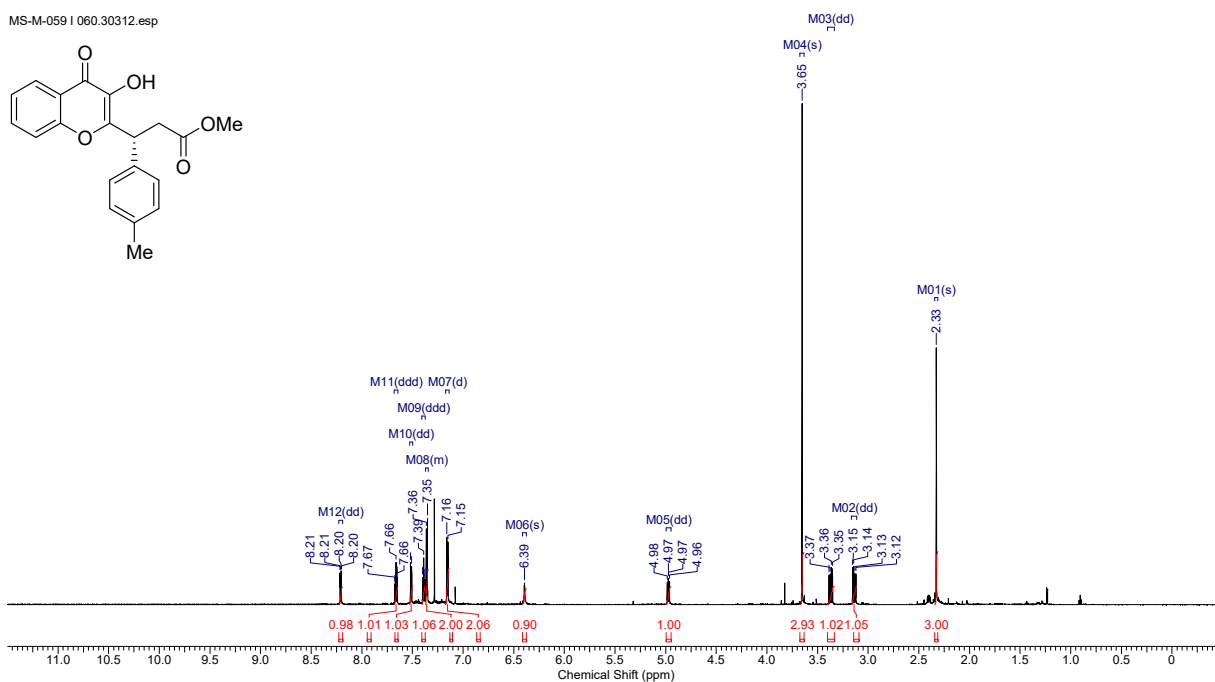

MS-M-059 | 060.30577.esp

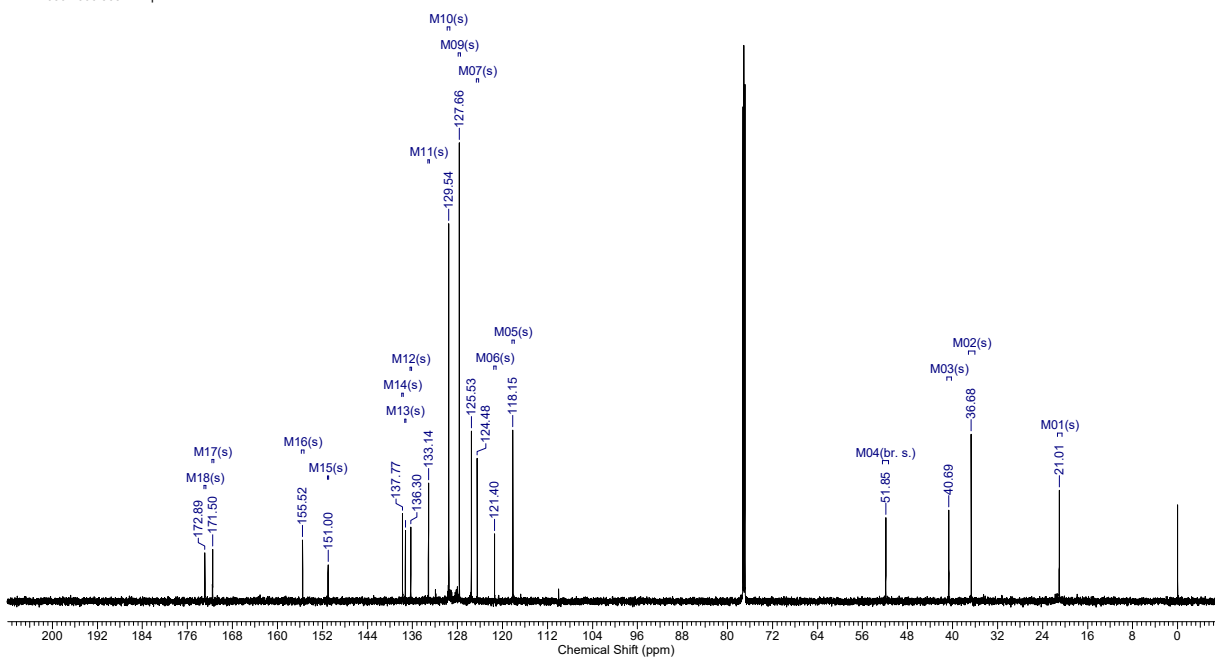

Figure S49. <sup>1</sup>H and <sup>13</sup>C NMR spectra of **3aga**



MS-M-069 | 070.30493.esp

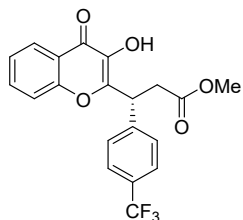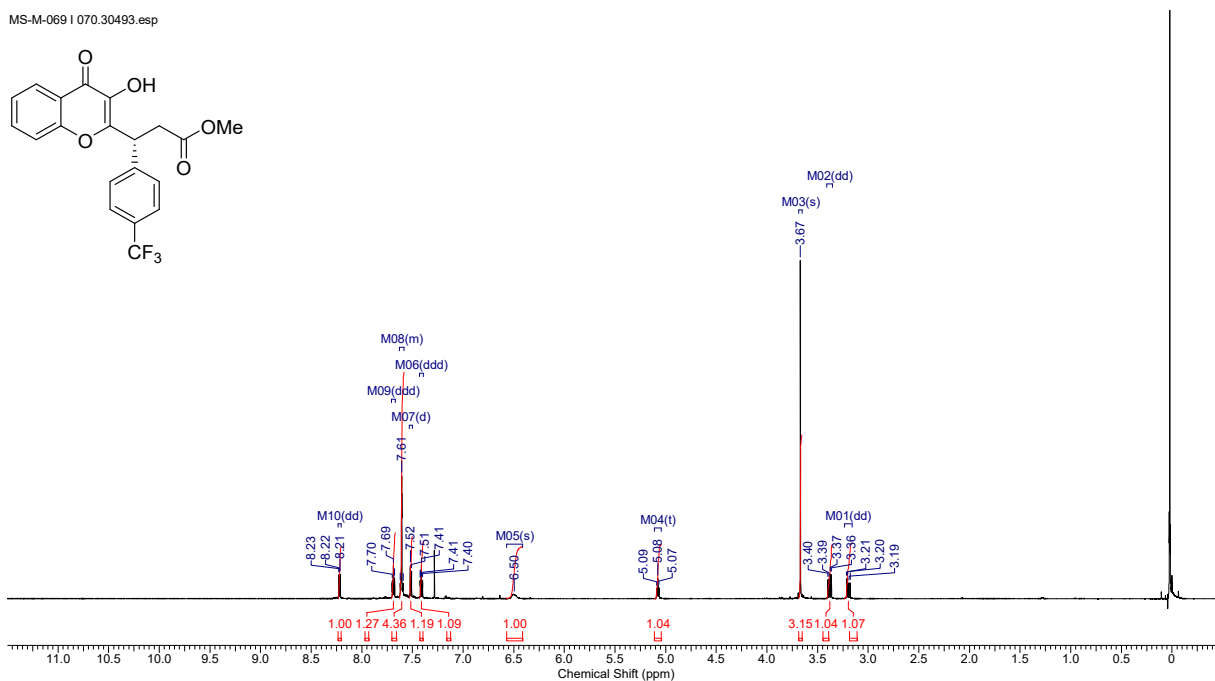

MS-M-069 | 070.30570.esp

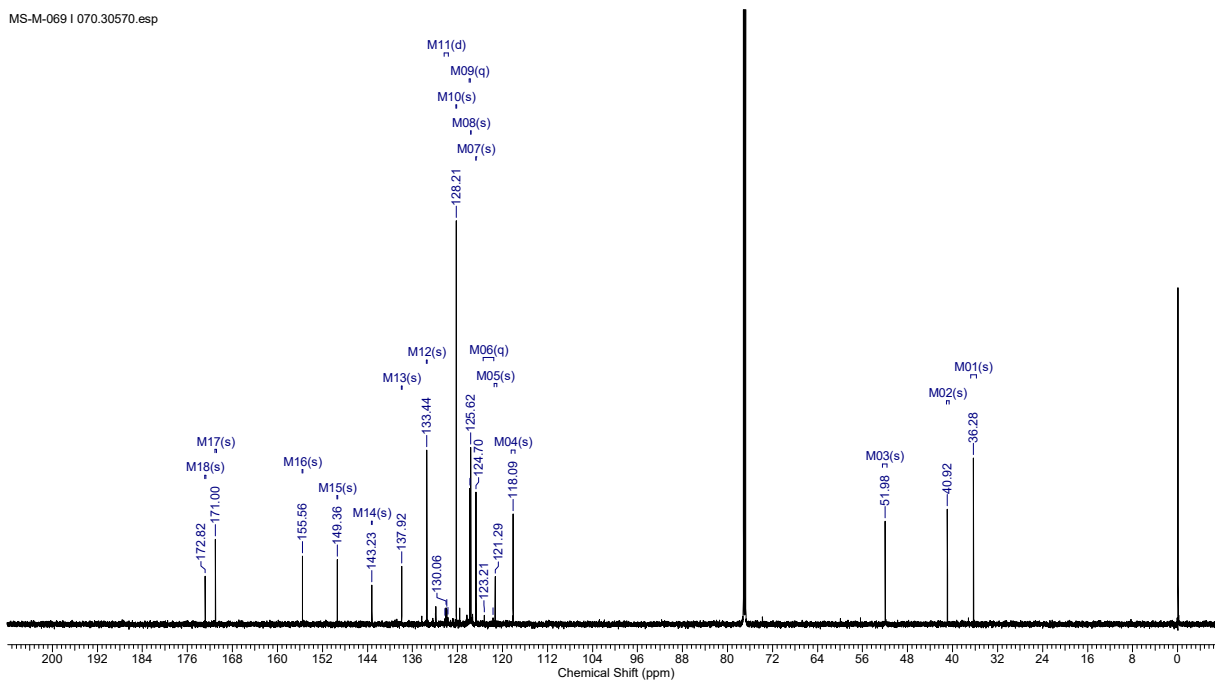

Figure S50. <sup>1</sup>H and <sup>13</sup>C NMR spectra of 3aha

MS-M-025 | 026.27557.esp

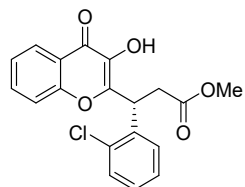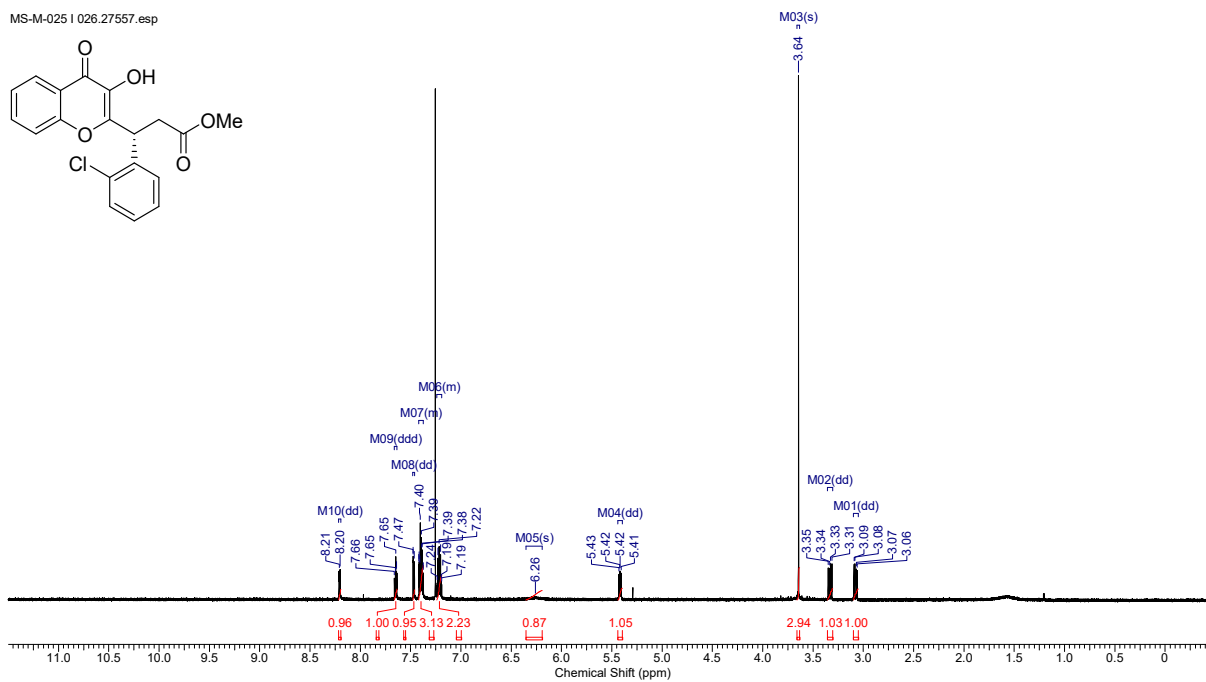

MS-M-025 | 026.27563.esp

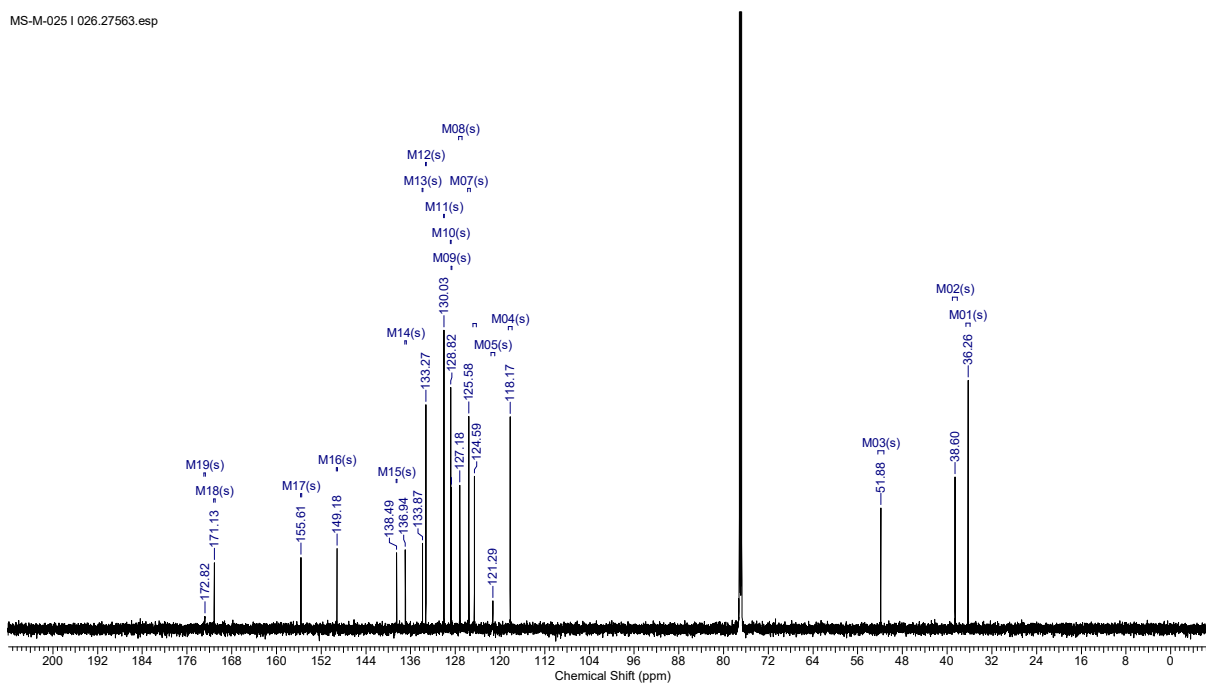

Figure S51.  $^1\text{H}$  and  $^{13}\text{C}$  NMR spectra of **3aia**

MS-M-027 | 028.28643.esp

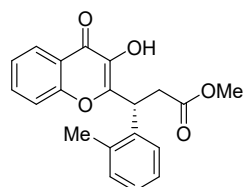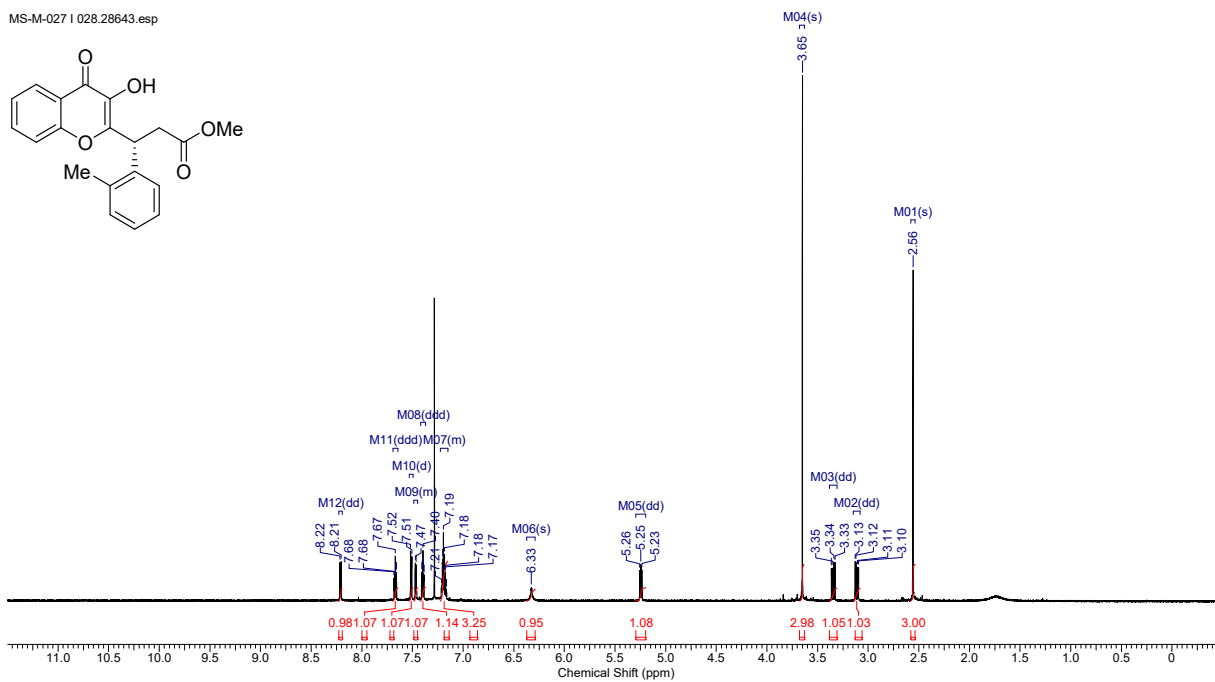

MS-M-027 | 028.28651.esp

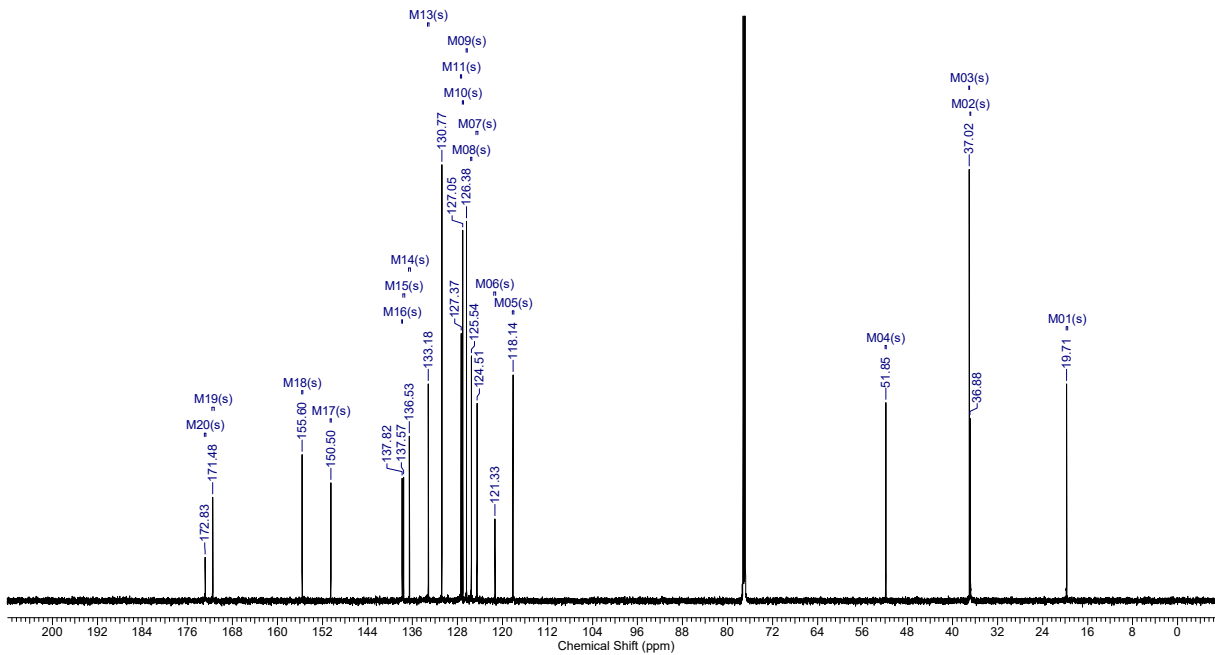

Figure S52. <sup>1</sup>H and <sup>13</sup>C NMR spectra of 3aja

MS-M-063 | 064.30360.esp

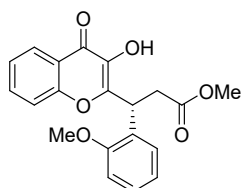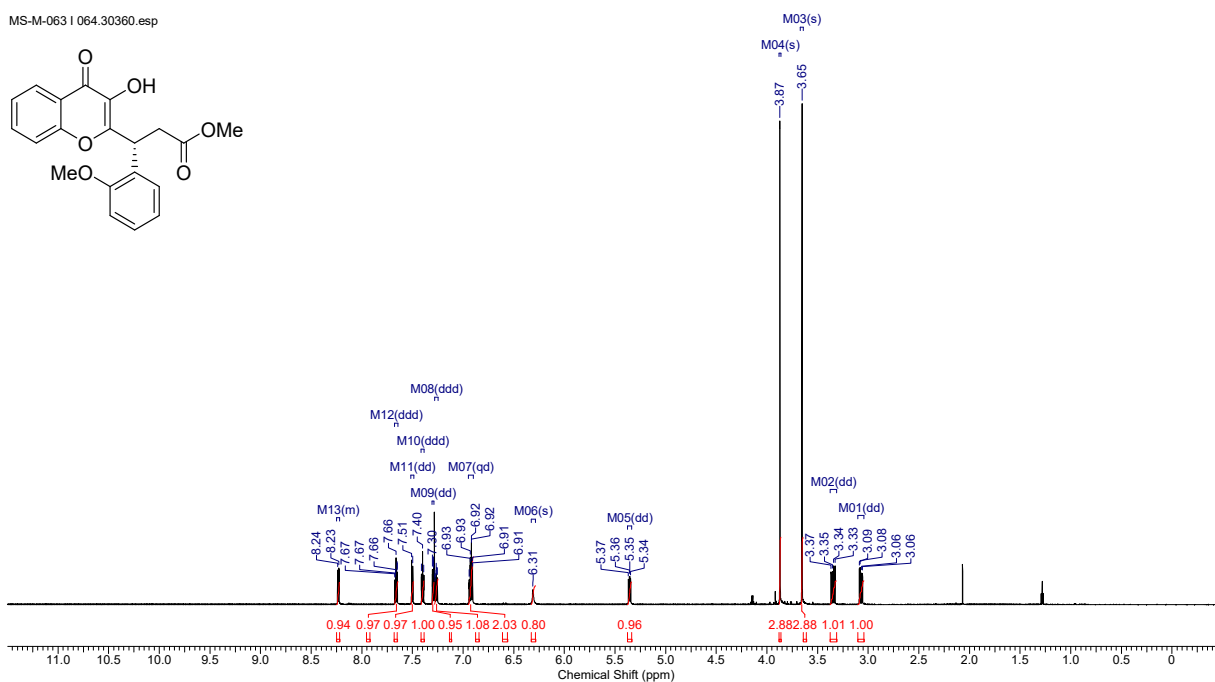

MS-M-063 | 064.30571.esp

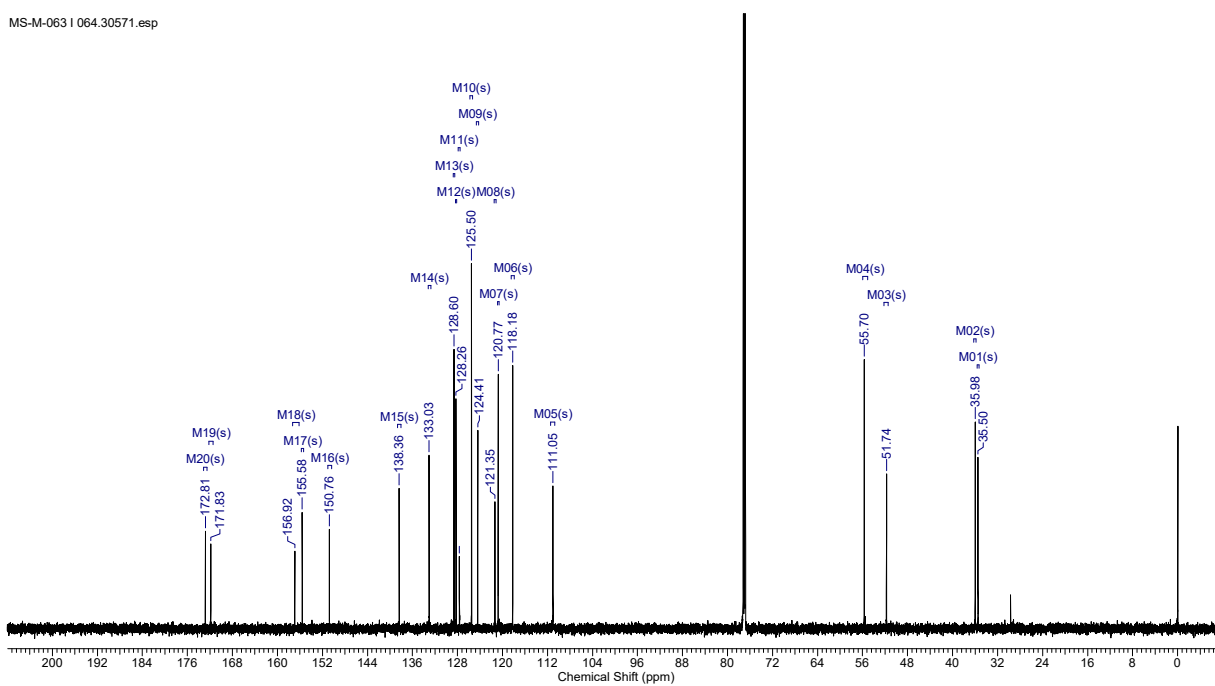

Figure S53. <sup>1</sup>H and <sup>13</sup>C NMR spectra of 3aka

MS-M-065 | 066.30313.esp

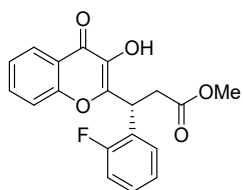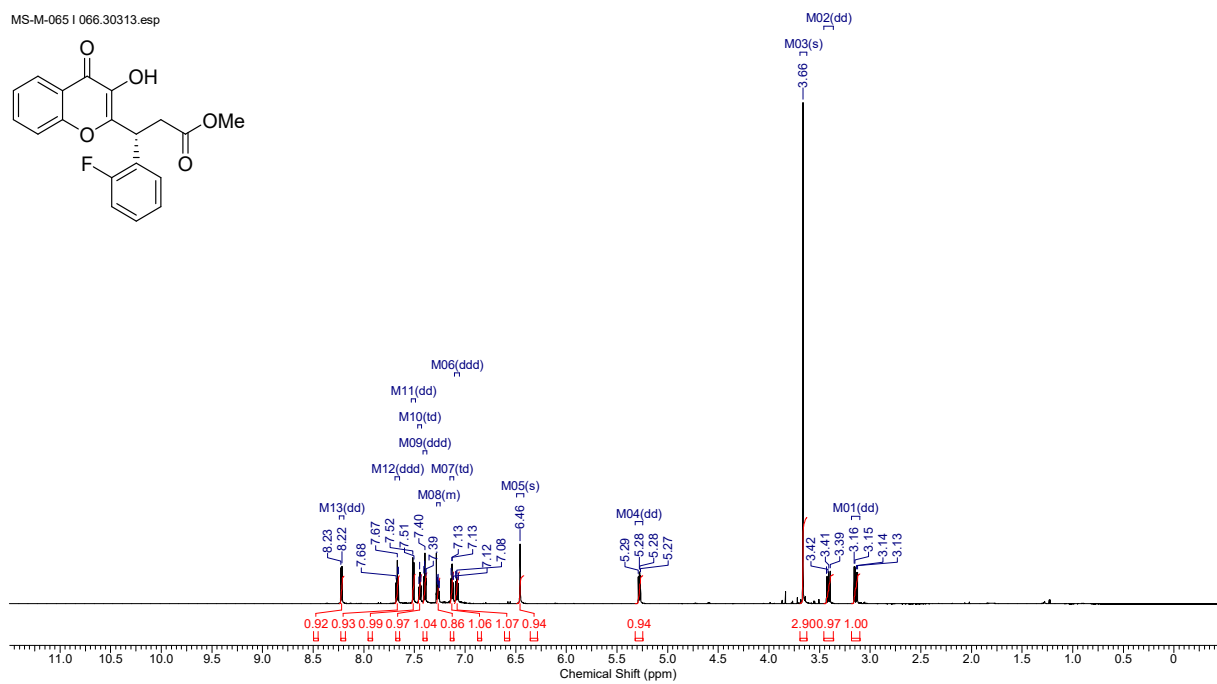

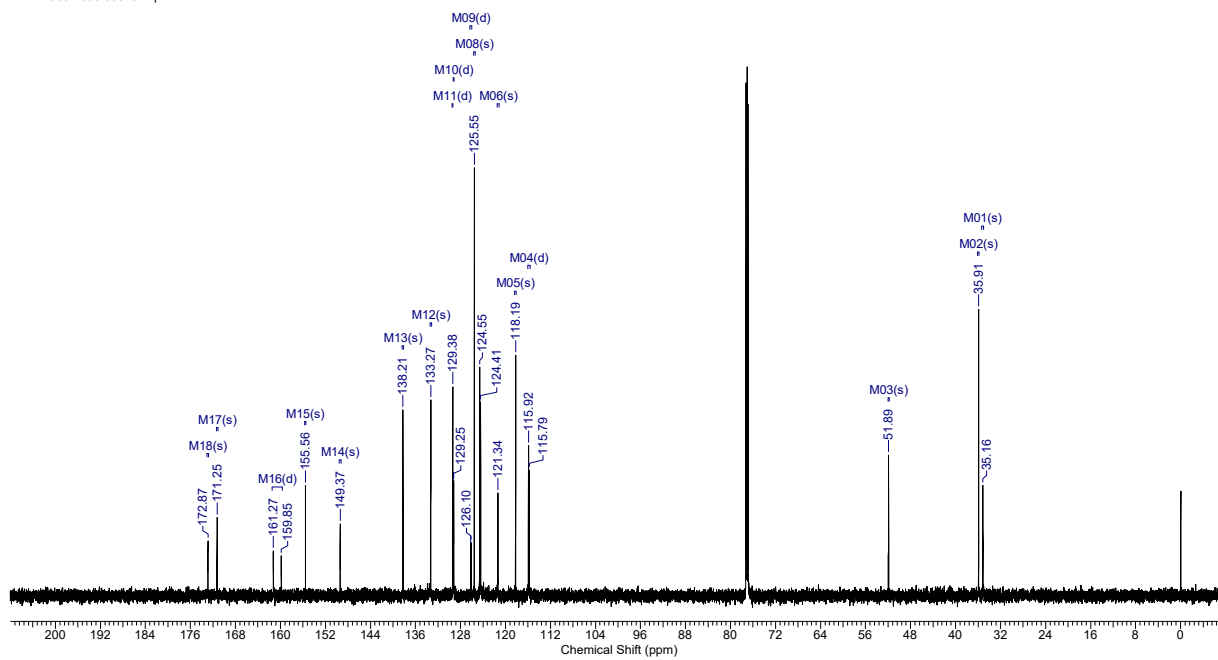Figure S54.  $^1\text{H}$  and  $^{13}\text{C}$  NMR spectra of **3a**

MS-M-019 | 020.29365.esp

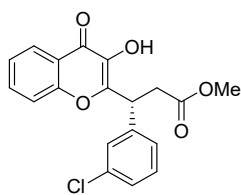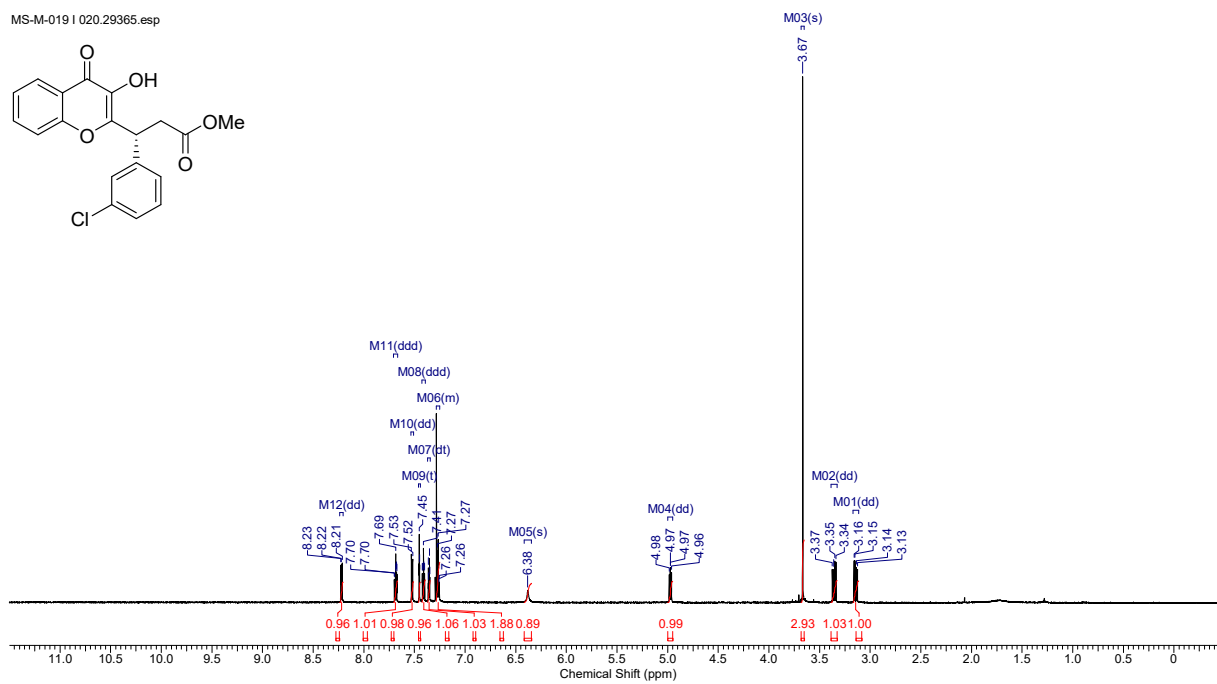

MS-M-019 | 020.29386.esp

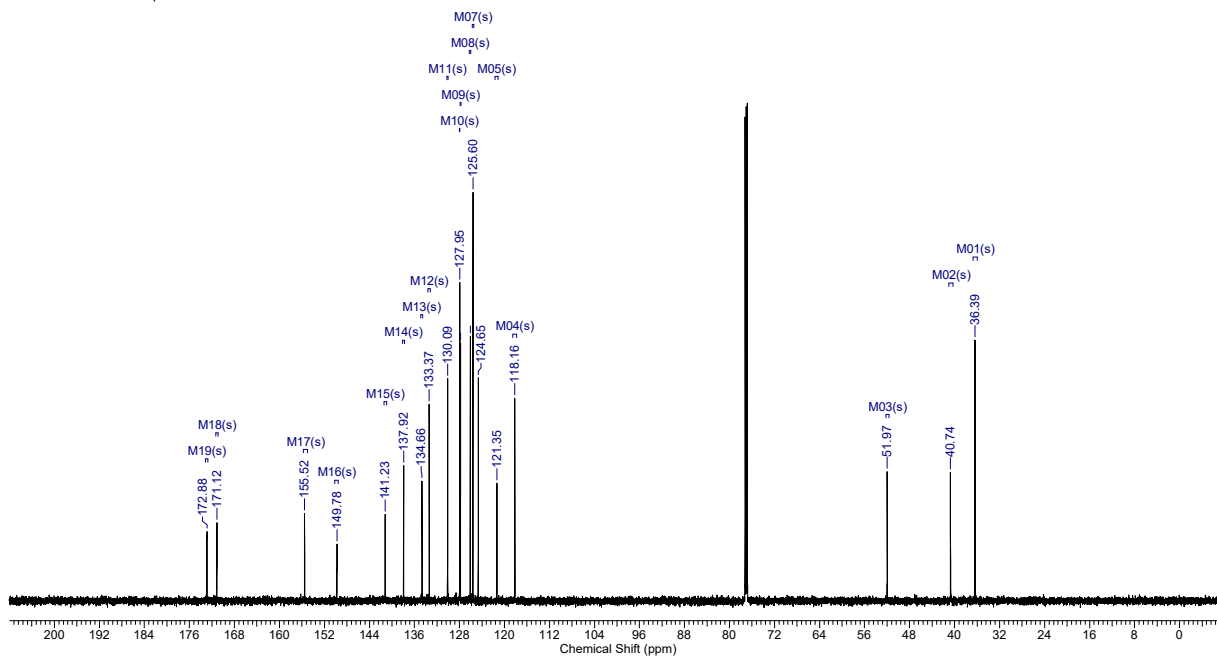

Figure S55. <sup>1</sup>H and <sup>13</sup>C NMR spectra of 3ama

MS-M-061 | 062.30311.esp

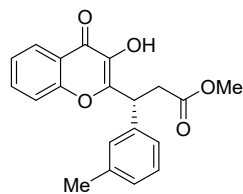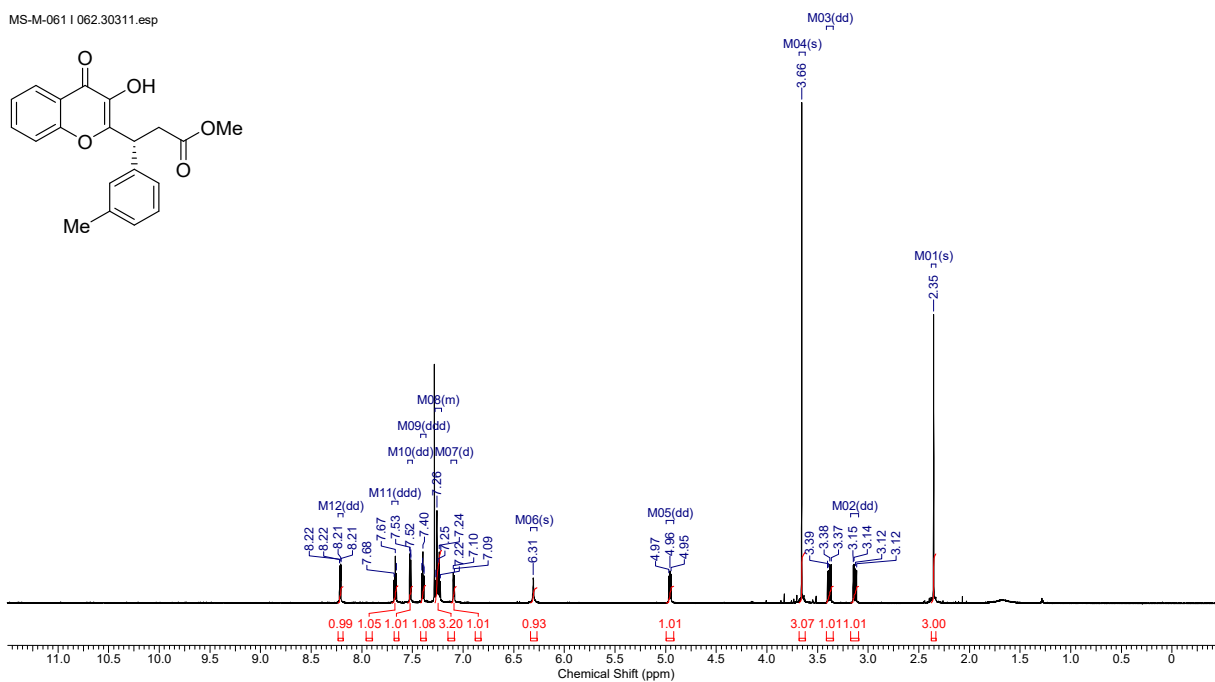

MS-M-061 | 062.30580.esp

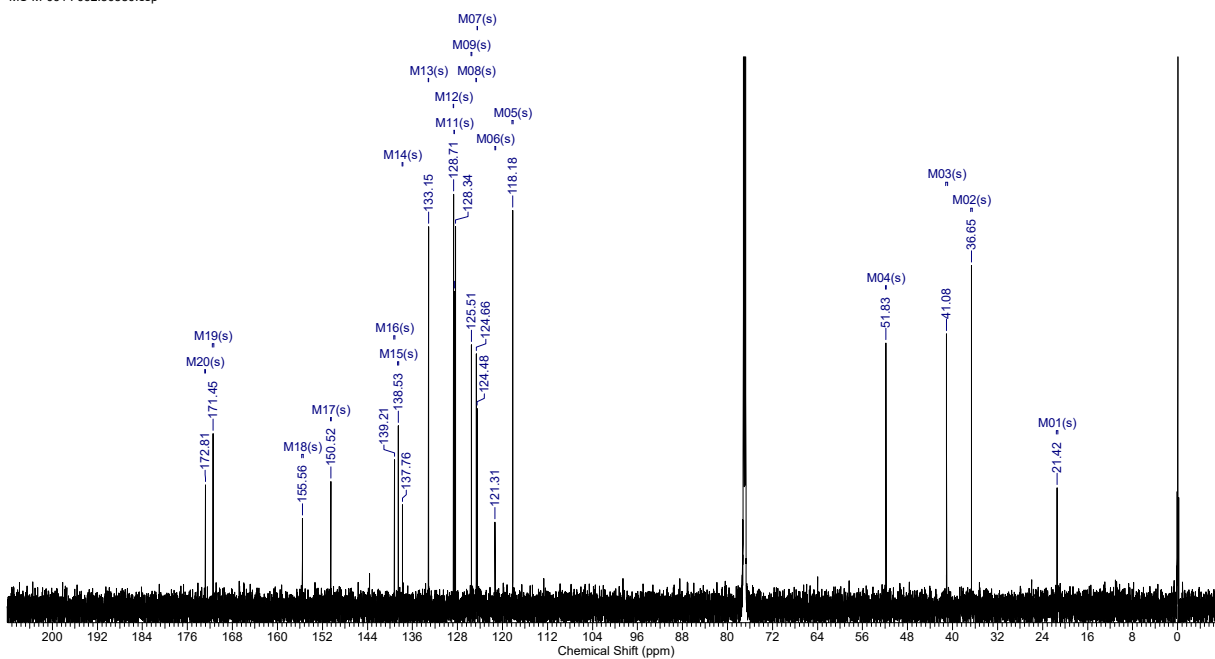

Figure S56. <sup>1</sup>H and <sup>13</sup>C NMR spectra of 3ana



MS-M-057 | 058.30314.esp

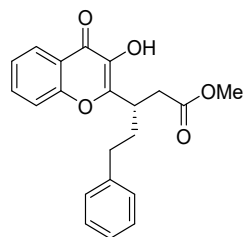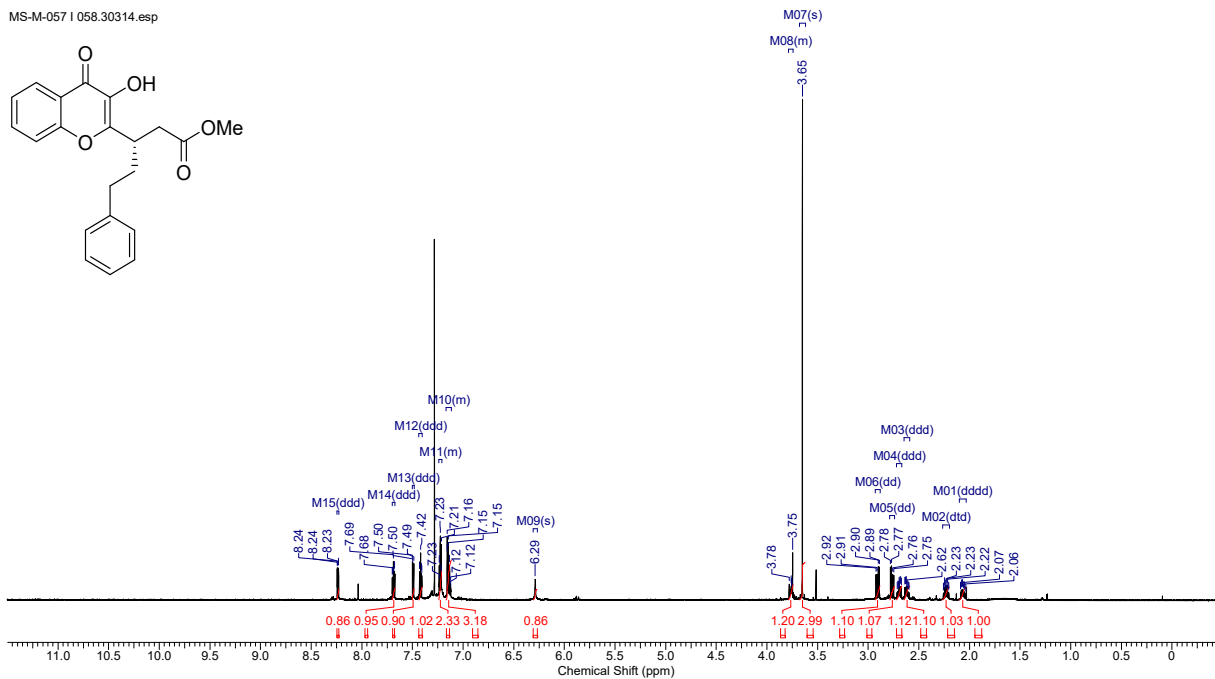

MS-M-057 | 058.30578.esp

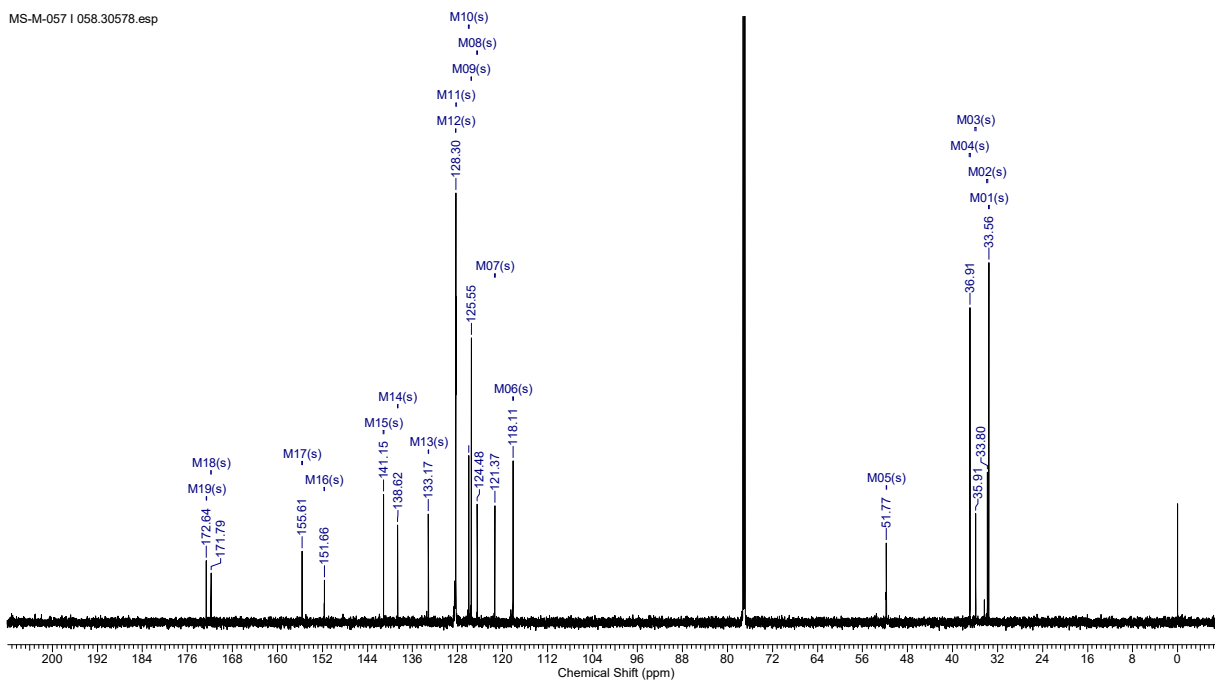

Figure S57. <sup>1</sup>H and <sup>13</sup>C NMR spectra of 3aoa

MS-M-041 | 042.29395.esp

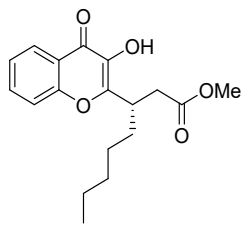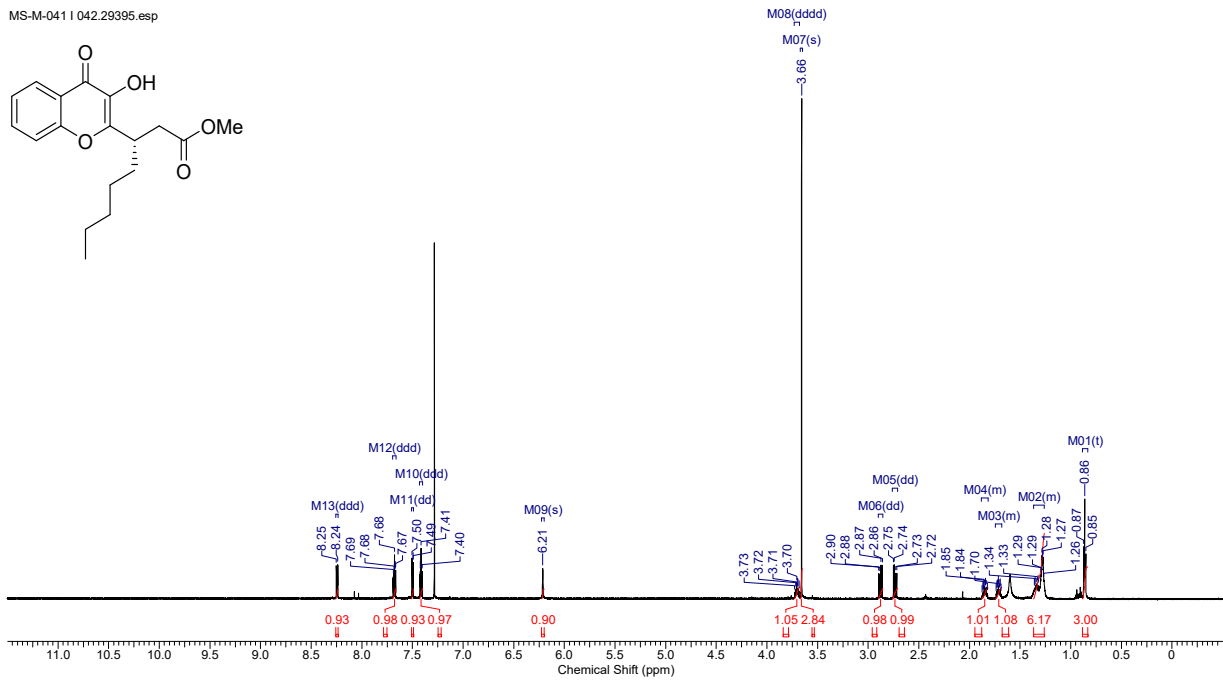

MS-M-041 | 042.29401.esp

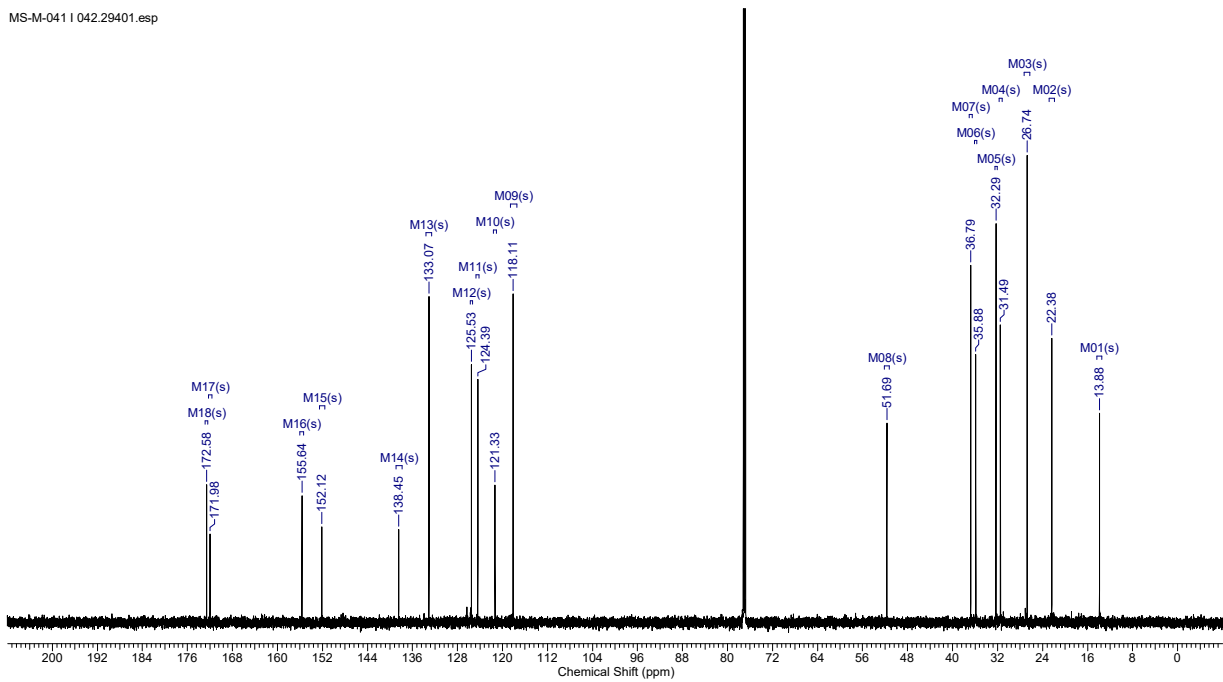

Figure S58. <sup>1</sup>H and <sup>13</sup>C NMR spectra of **3pa**

MS-M-047 | 048.30263.esp

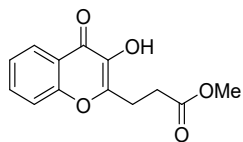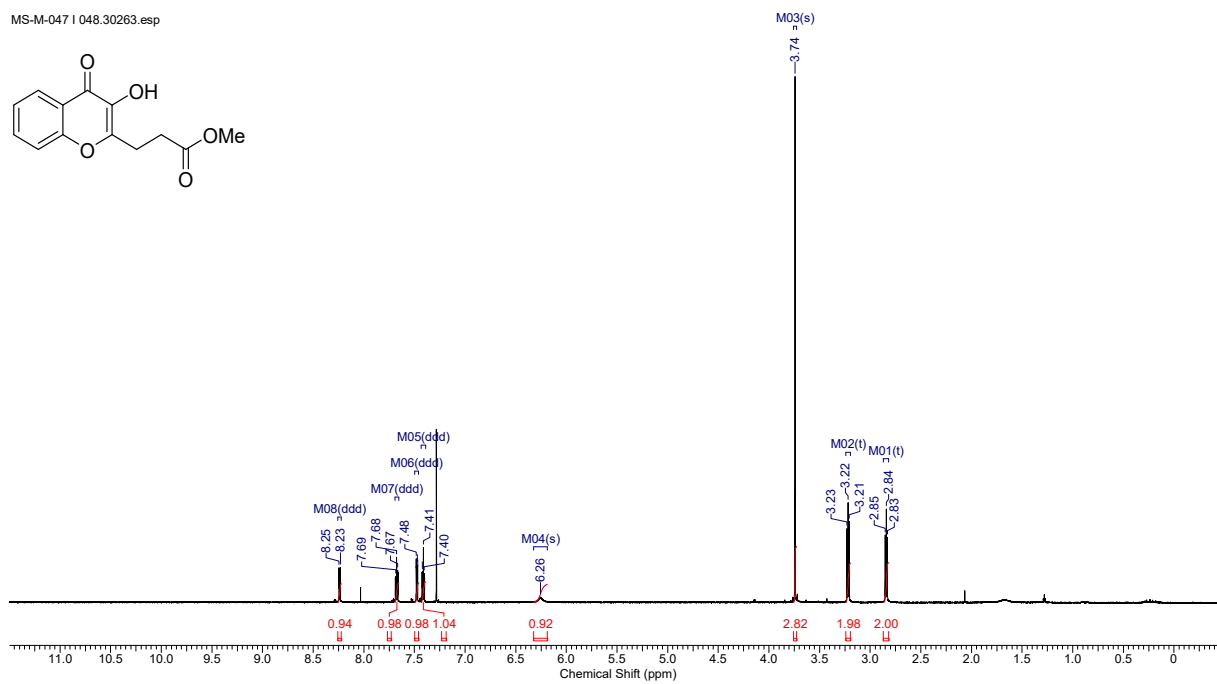

MS-M-047 | 048.30288.esp

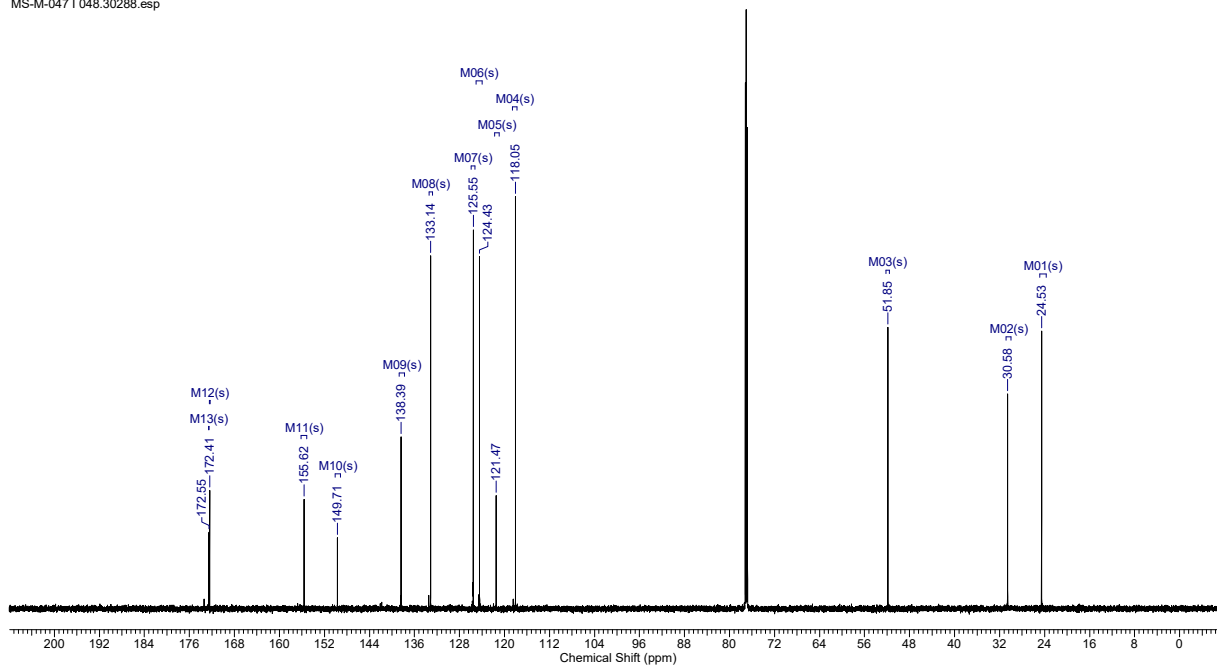

Figure S59.  $^1\text{H}$  and  $^{13}\text{C}$  NMR spectra of **3aqa**

KDD519.27897.esp

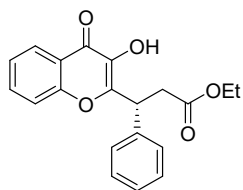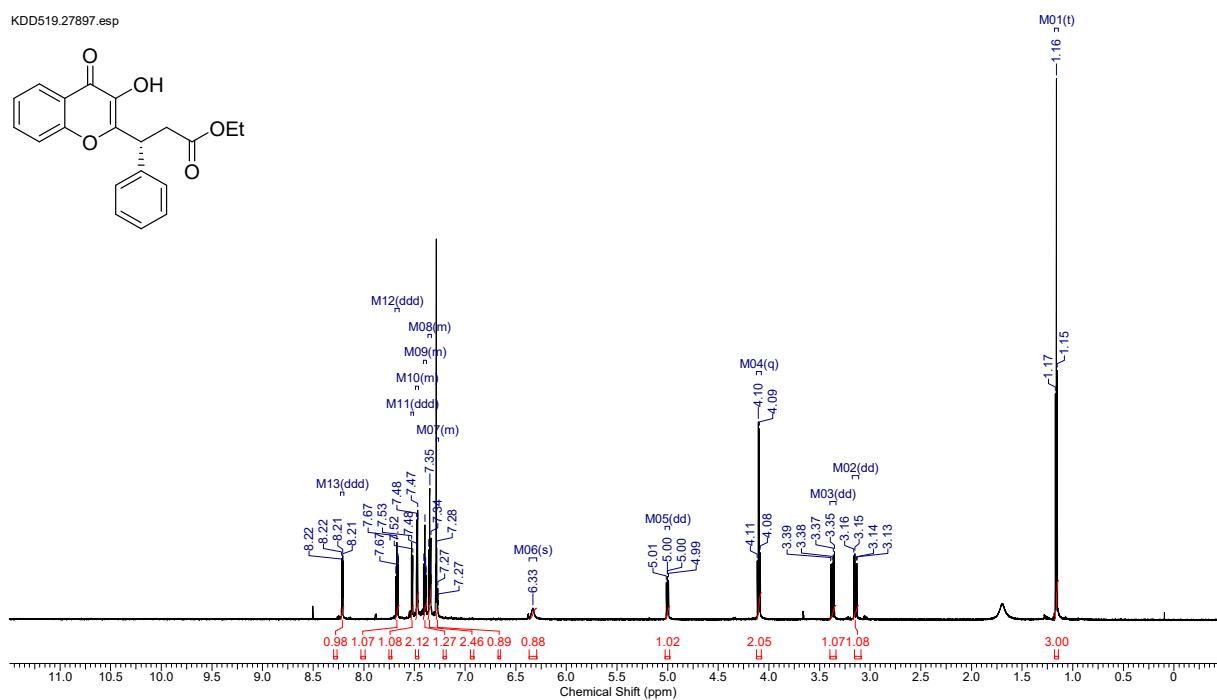

KDD519.27915.esp

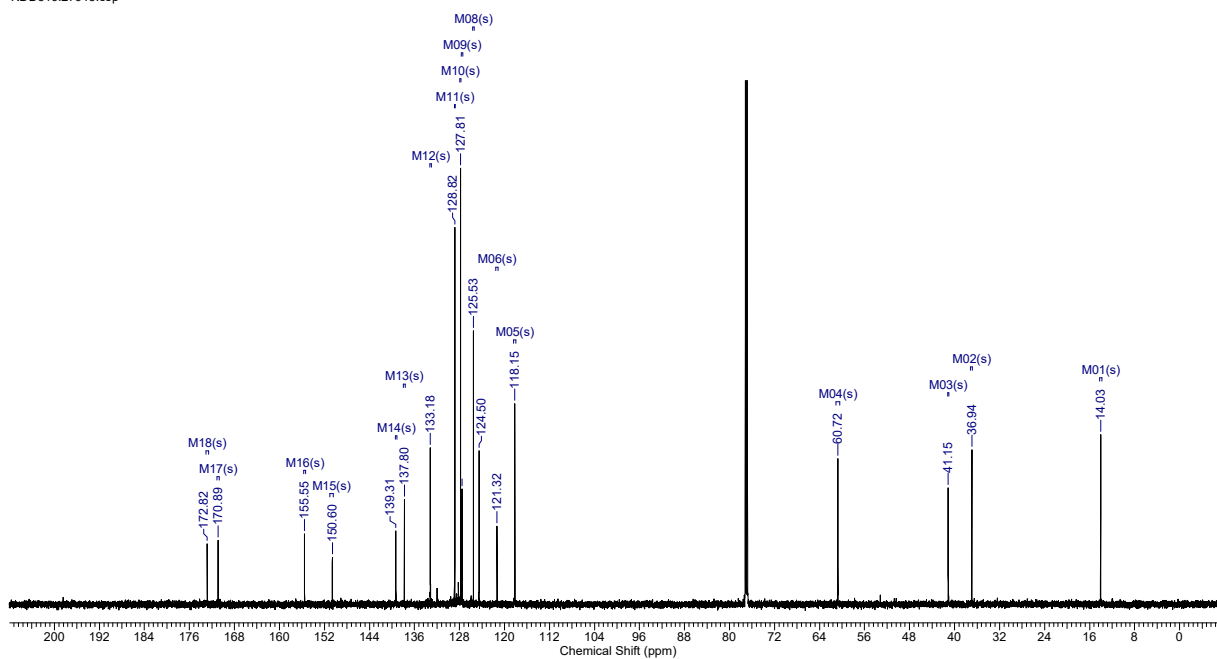

Figure S60. <sup>1</sup>H and <sup>13</sup>C NMR spectra of 3aab

KDD521.27958.esp

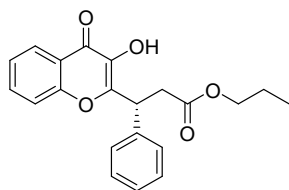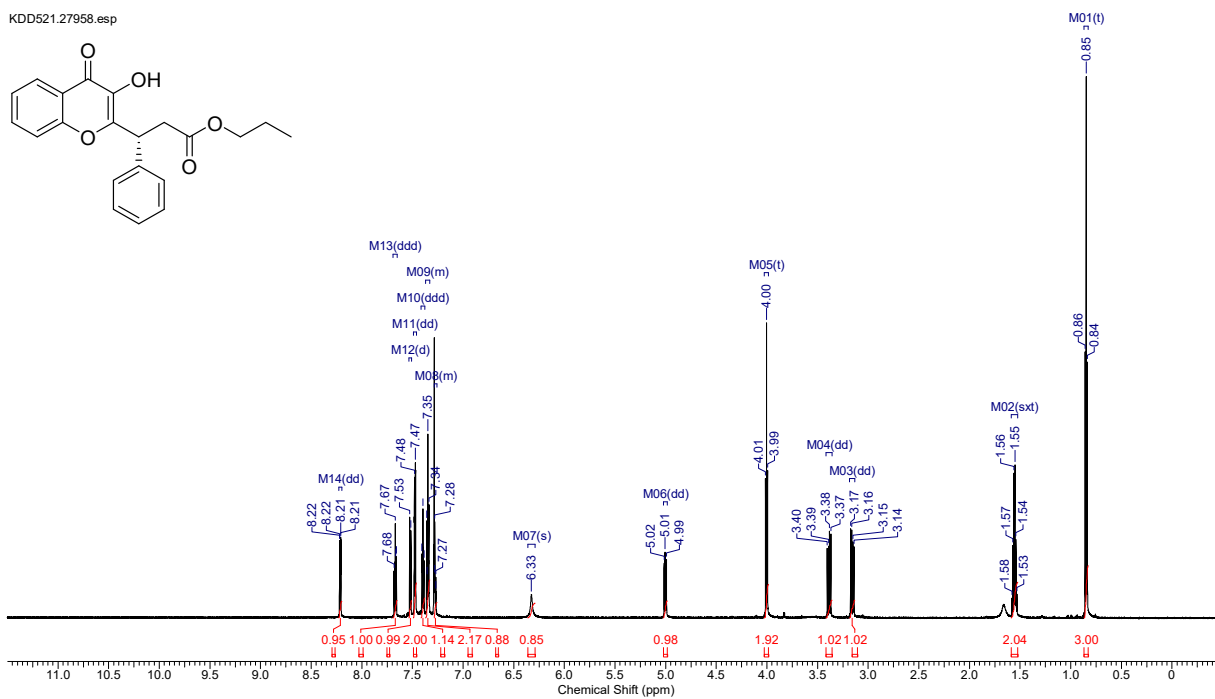

KDD521.2624.esp

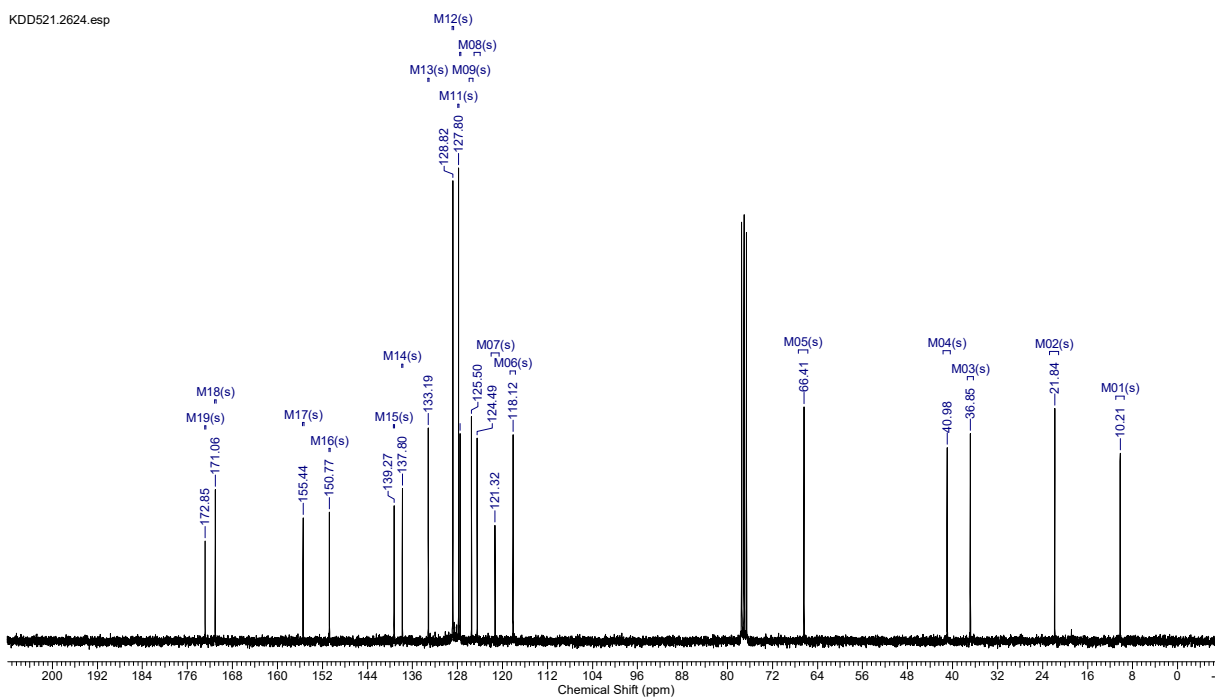

Figure S61. <sup>1</sup>H and <sup>13</sup>C NMR spectra of 3aac

KDD523.27959.esp

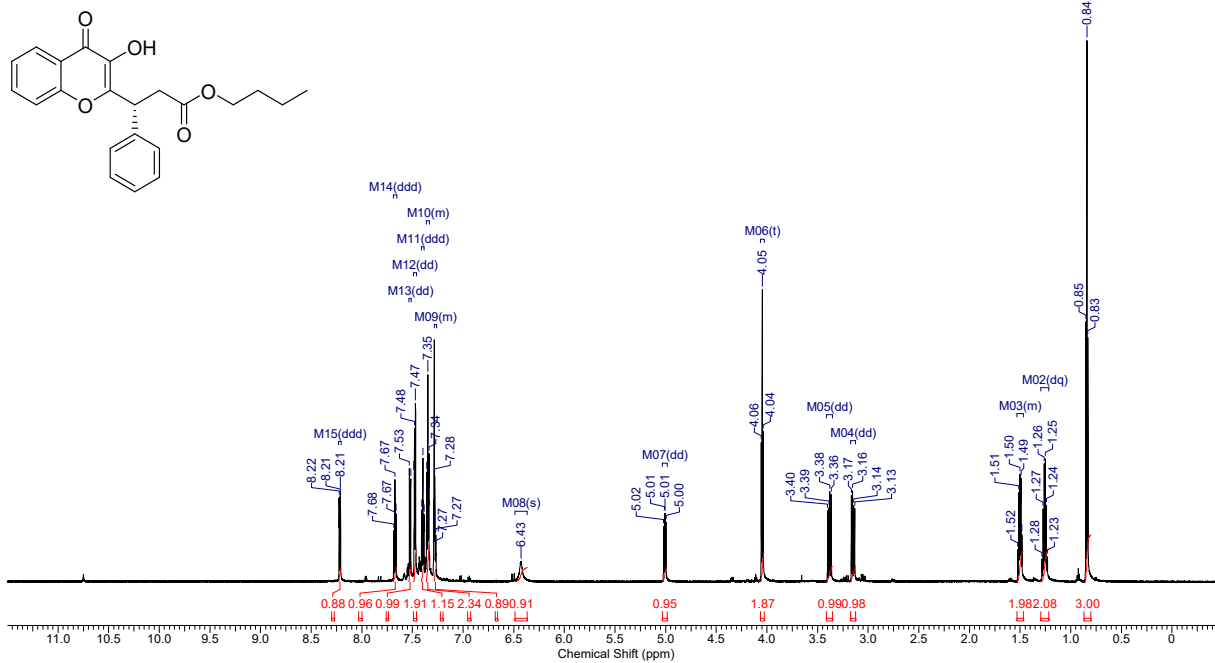

KDD523.2625.esp

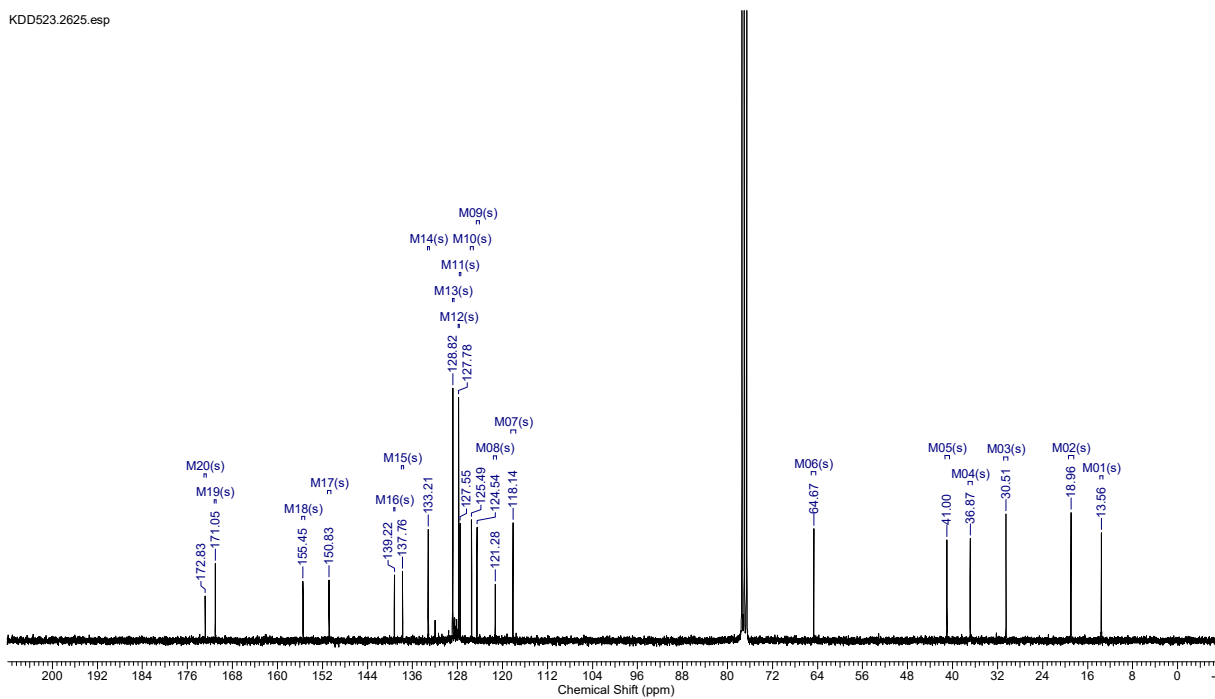

Figure S62. <sup>1</sup>H and <sup>13</sup>C NMR spectra of 3aad

KDD541.27831.esp

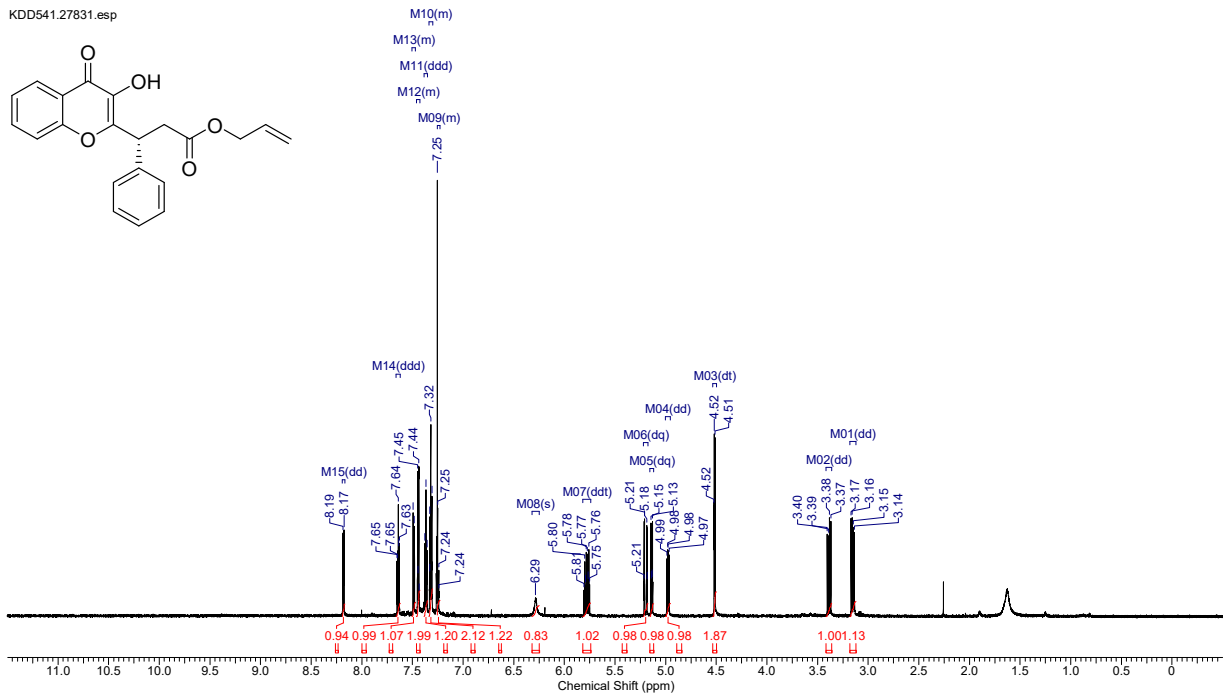

KDD541.2614.esp

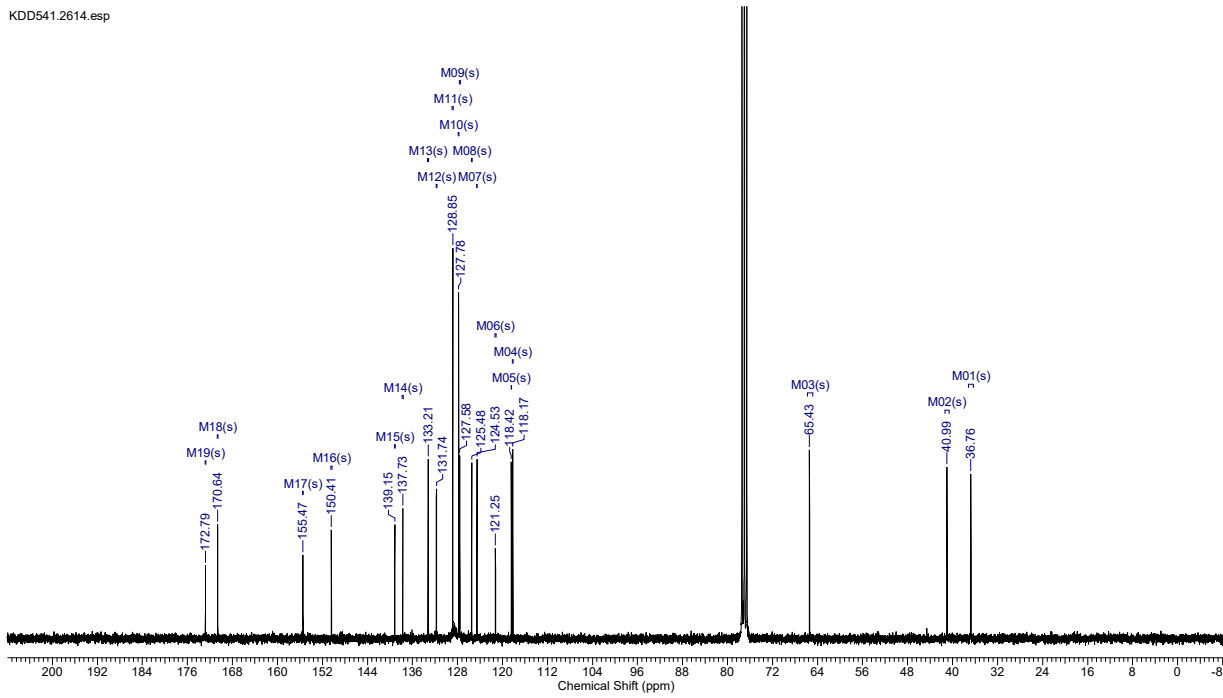

Figure S63. <sup>1</sup>H and <sup>13</sup>C NMR spectra of 3aae

KDD535.27704.esp

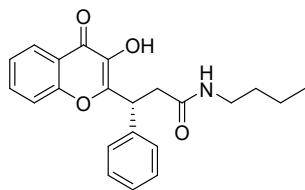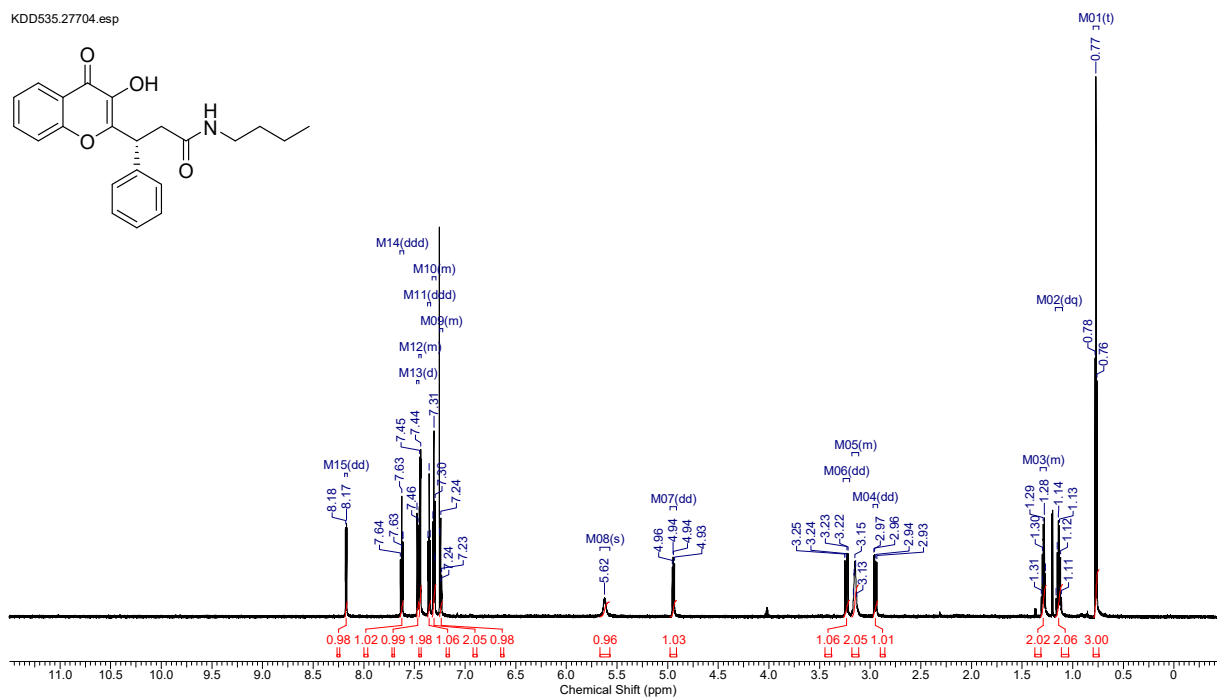

KDD535.27729.esp

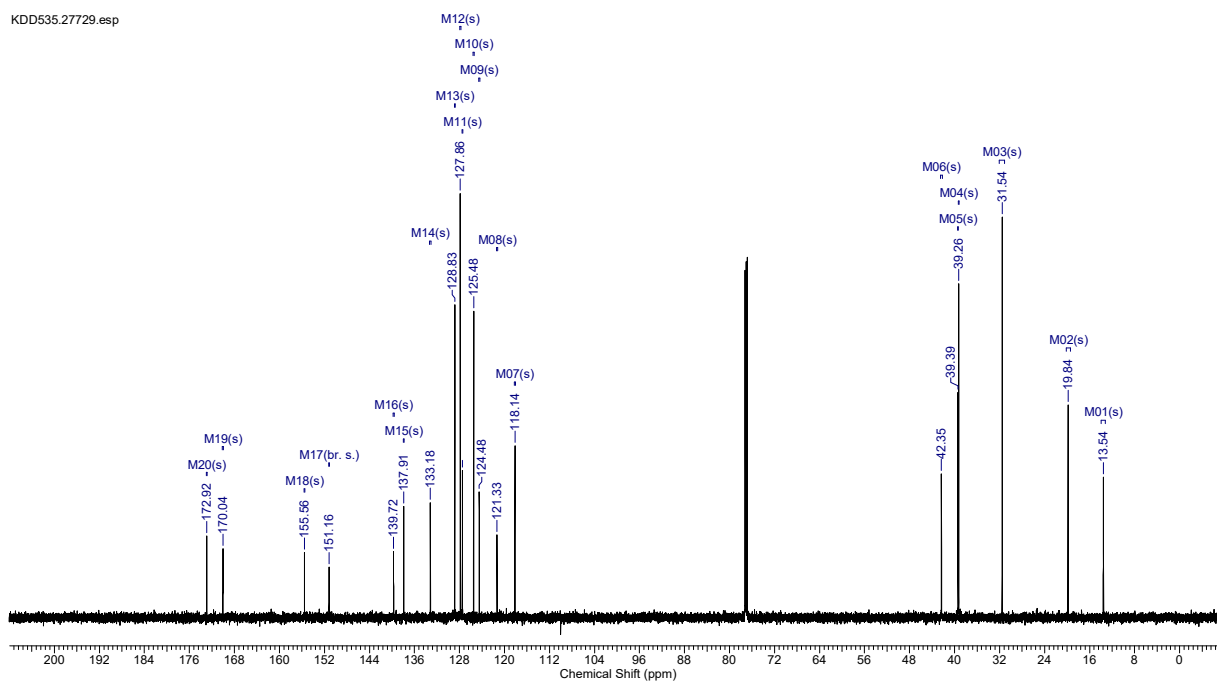

Figure S64. <sup>1</sup>H and <sup>13</sup>C NMR spectra of 3aaf



KDD537.27960.esp

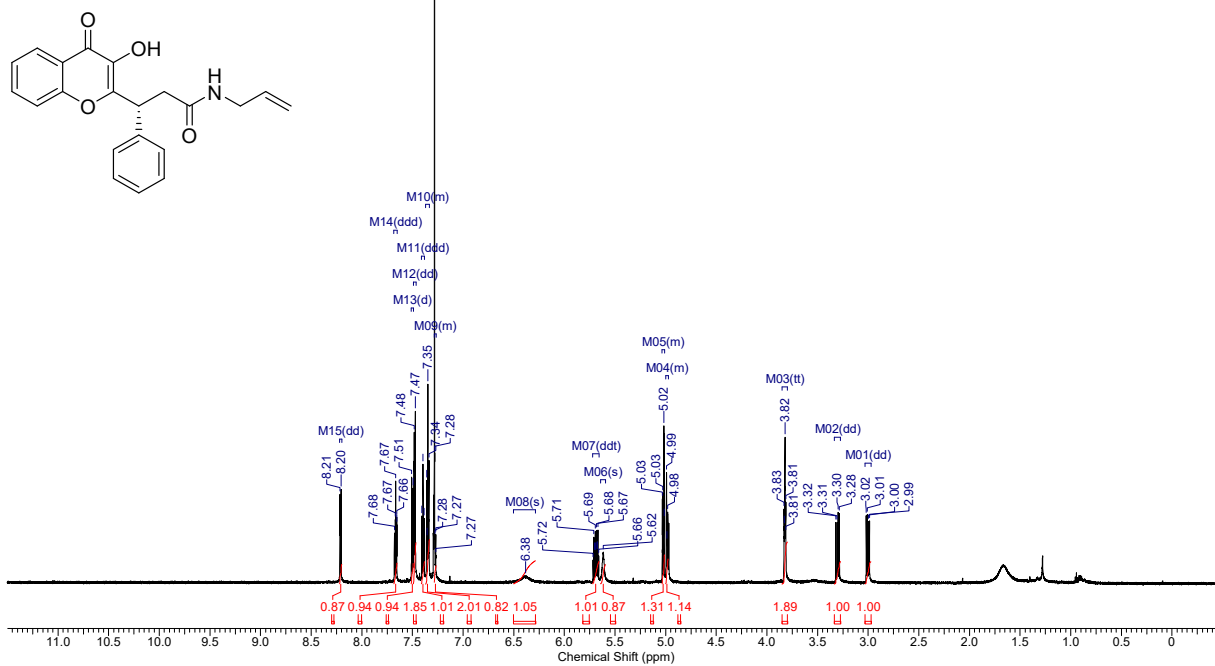

KDD537.2626.esp

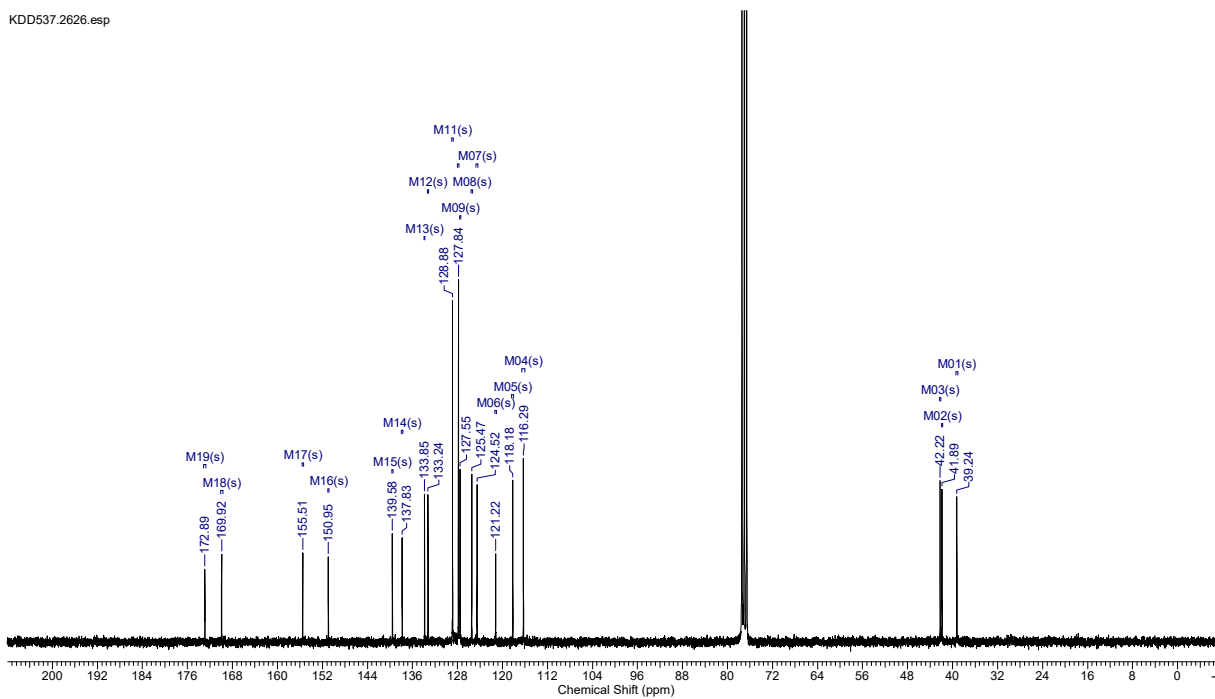

Figure S65. <sup>1</sup>H and <sup>13</sup>C NMR spectra of **3aa**

KDD539.27742.esp

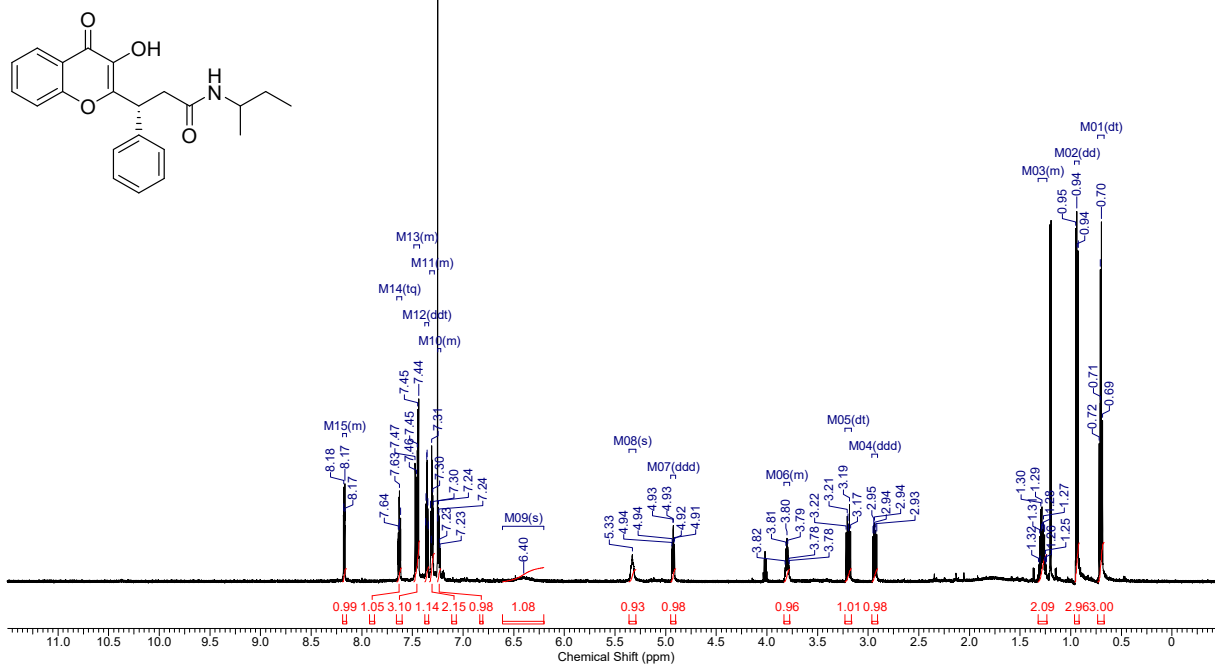

KDD539.27760.esp

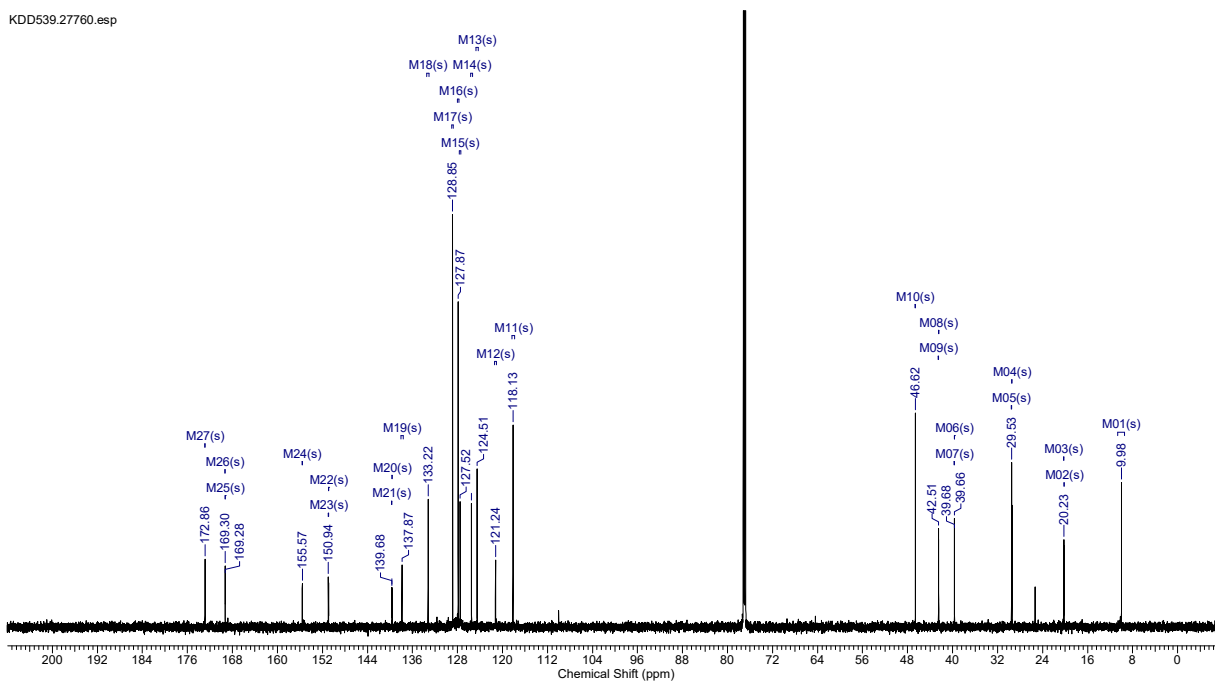

Figure S66. <sup>1</sup>H and <sup>13</sup>C NMR spectra of 3aah

KDD531.27898.esp

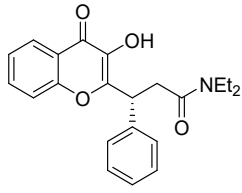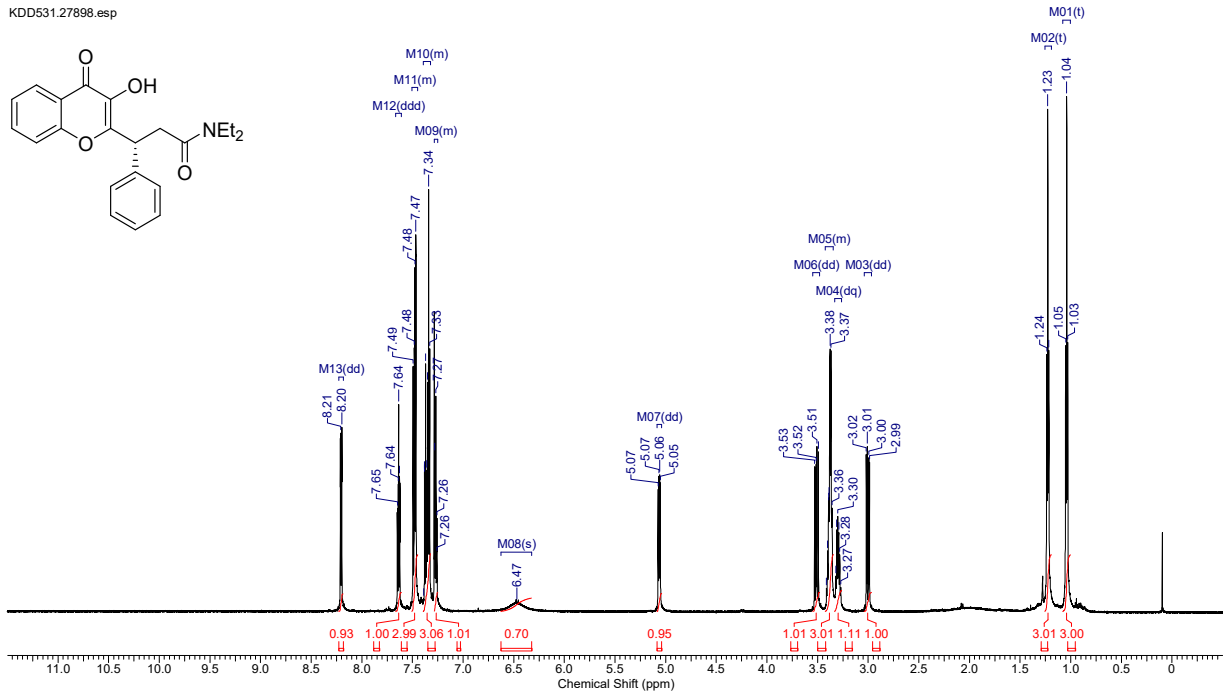

KDD531.2619.esp

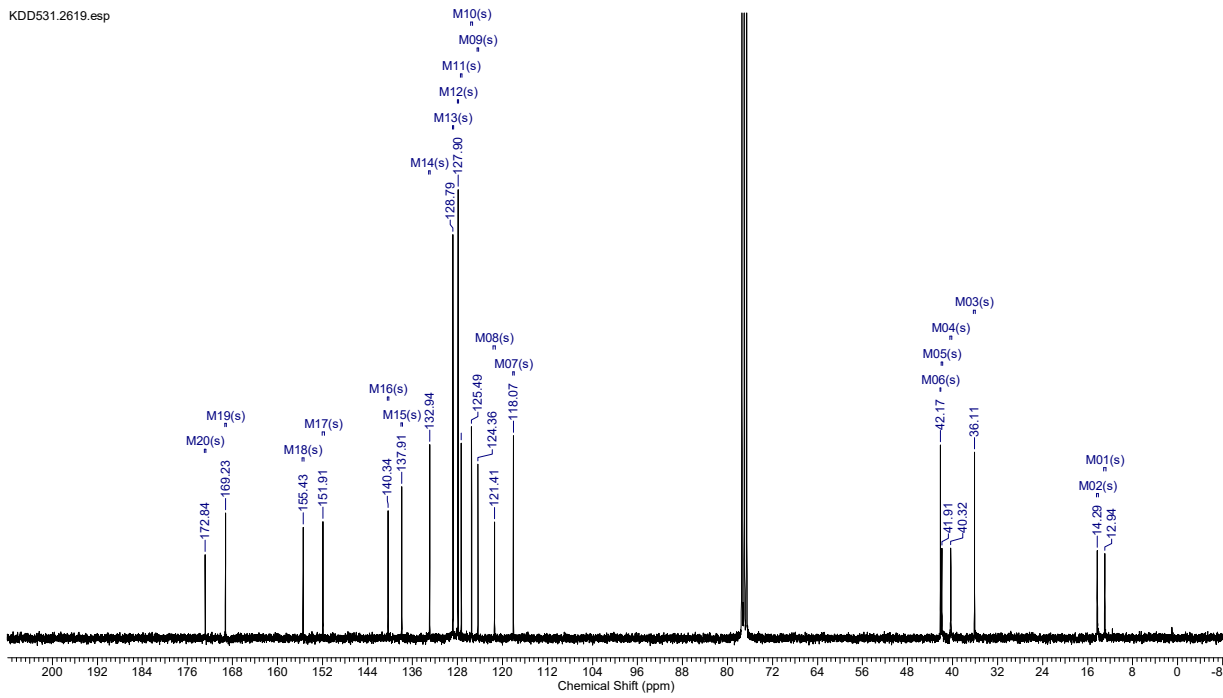

Figure S67. <sup>1</sup>H and <sup>13</sup>C NMR spectra of 3aai

KDD545.27832.esp

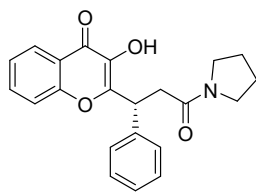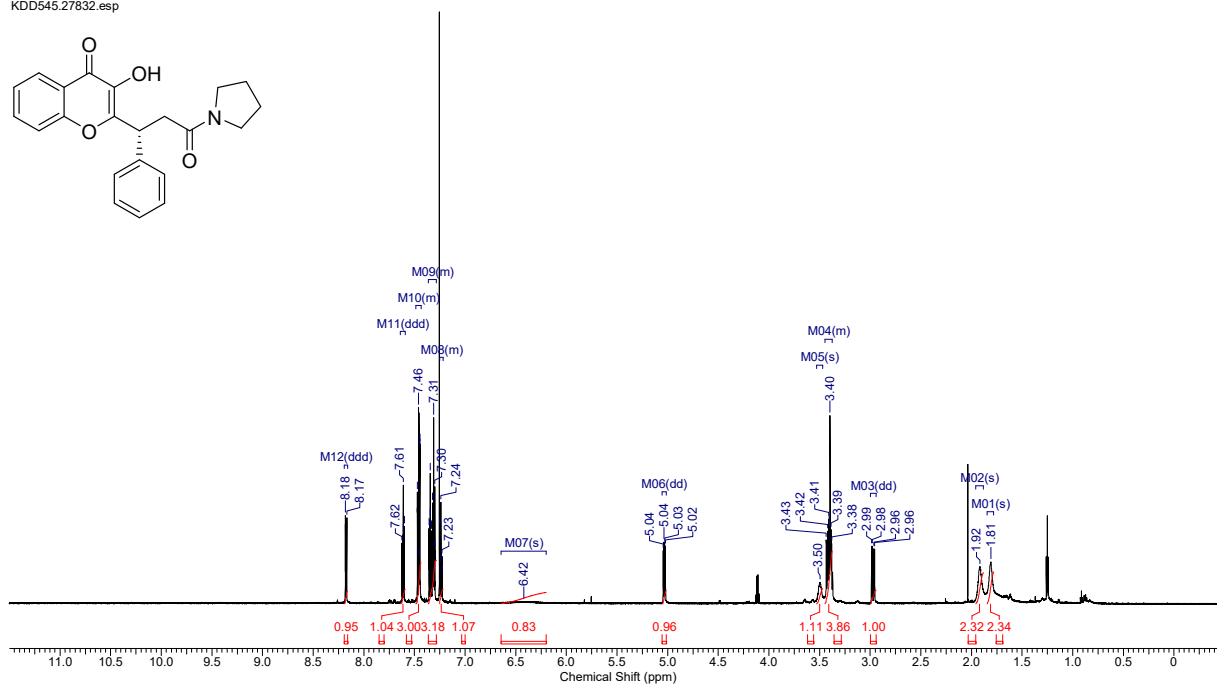

KDD545.2615.esp

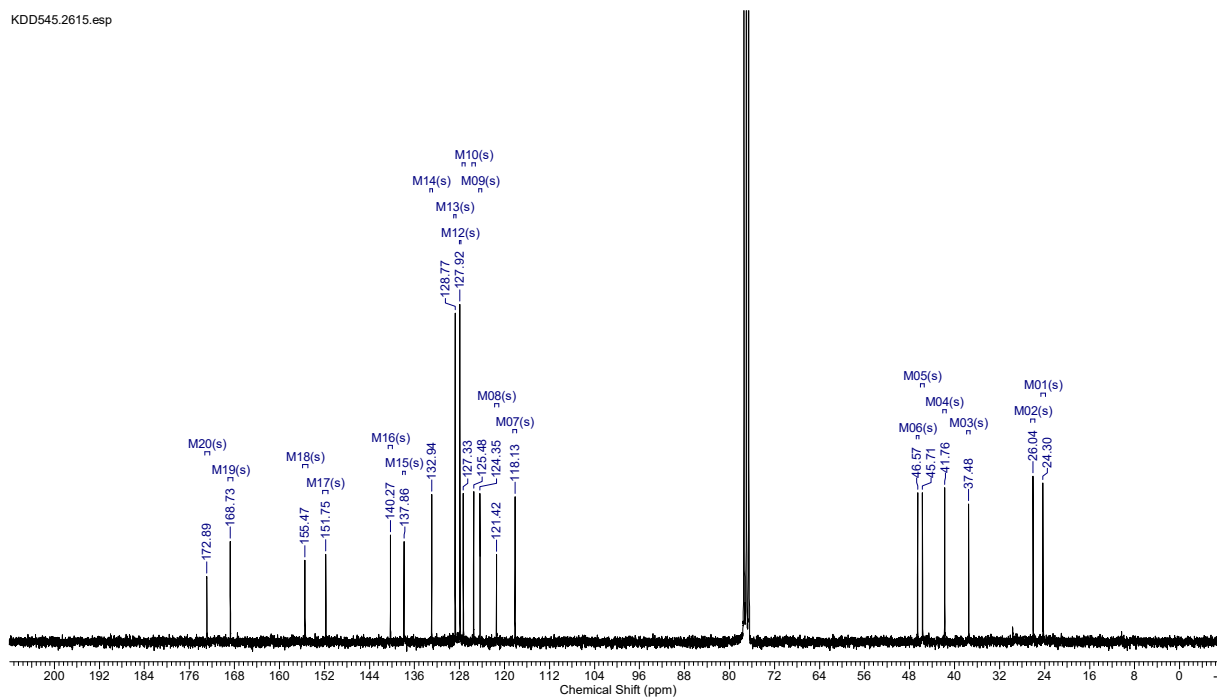

Figure S68. <sup>1</sup>H and <sup>13</sup>C NMR spectra of 3aj

KDD547.27833.esp

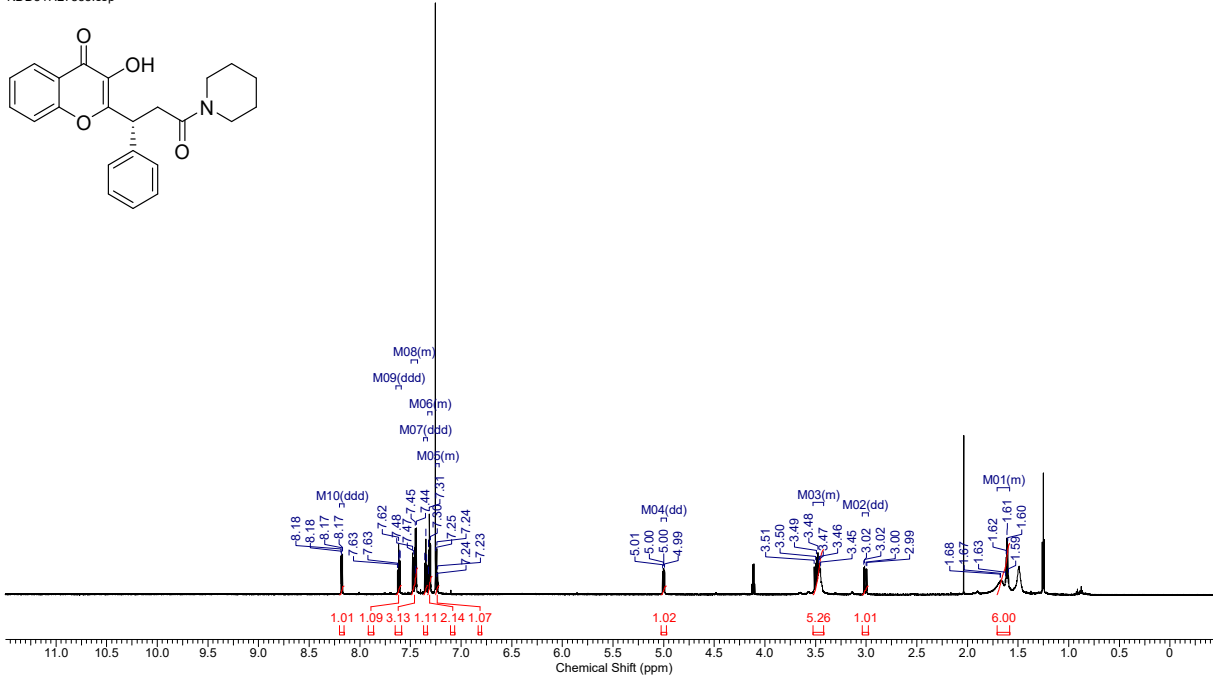

KDD547.2616.esp

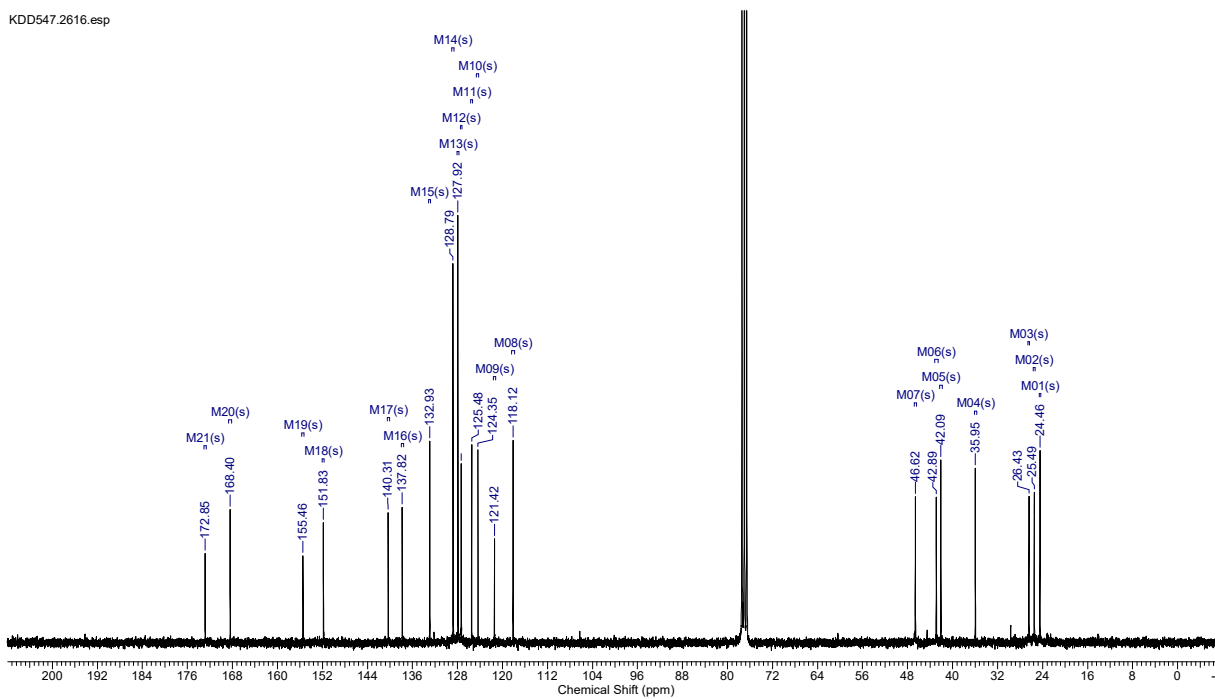

Figure S69. <sup>1</sup>H and <sup>13</sup>C NMR spectra of 3aak

## 5. HPLC Chromatograms

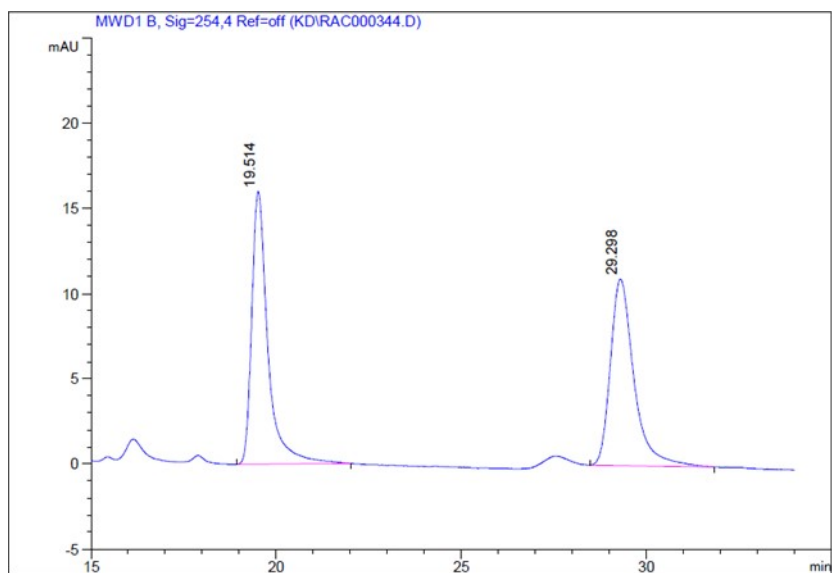

| # | Meas. R | Area    | Area % |
|---|---------|---------|--------|
| 1 | 19.514  | 487.202 | 50.126 |
| 2 | 29.298  | 484.743 | 49.874 |

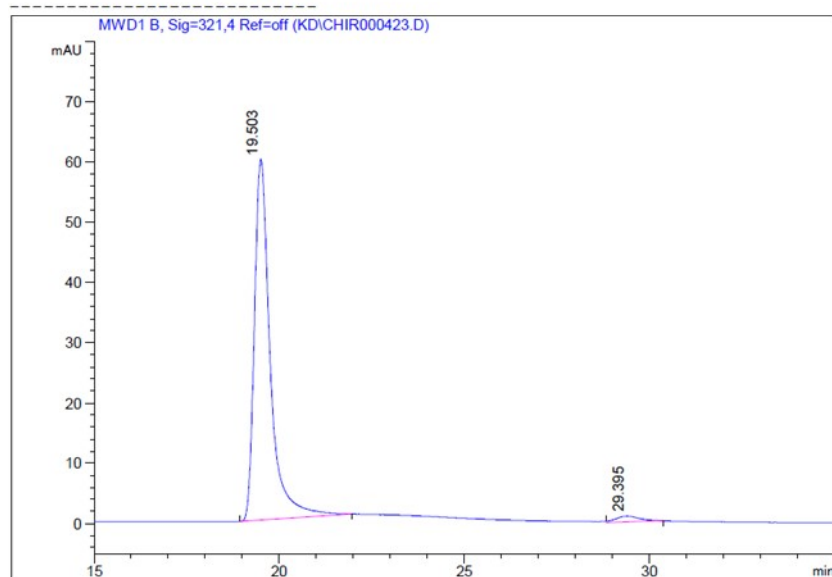

| # | Meas. R | Area    | Area % |
|---|---------|---------|--------|
| 1 | 19.503  | 1.786e3 | 97.724 |
| 2 | 29.395  | 41.590  | 2.276  |

Figure S70. HPLC chromatograms of **3aaa**

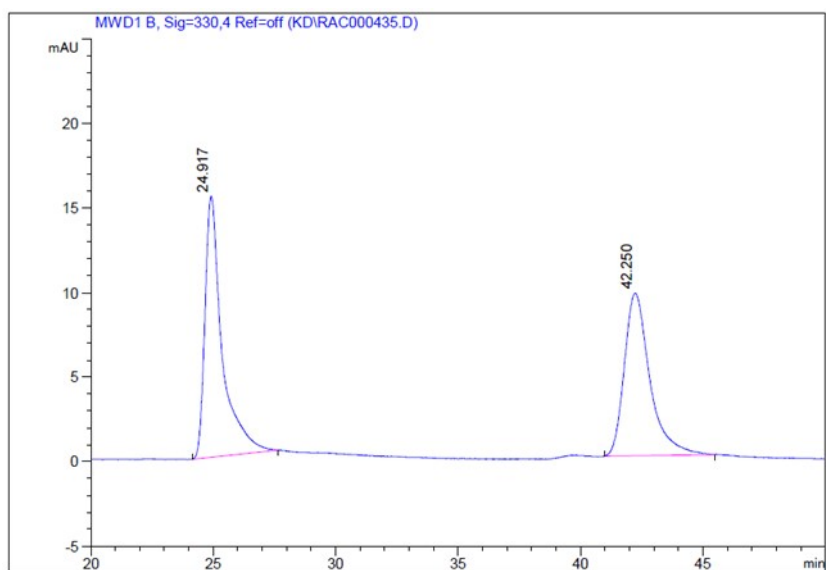

| # | Meas. R | Area    | Area % |
|---|---------|---------|--------|
| 1 | 24.917  | 751.141 | 51.847 |
| 2 | 42.250  | 697.619 | 48.153 |

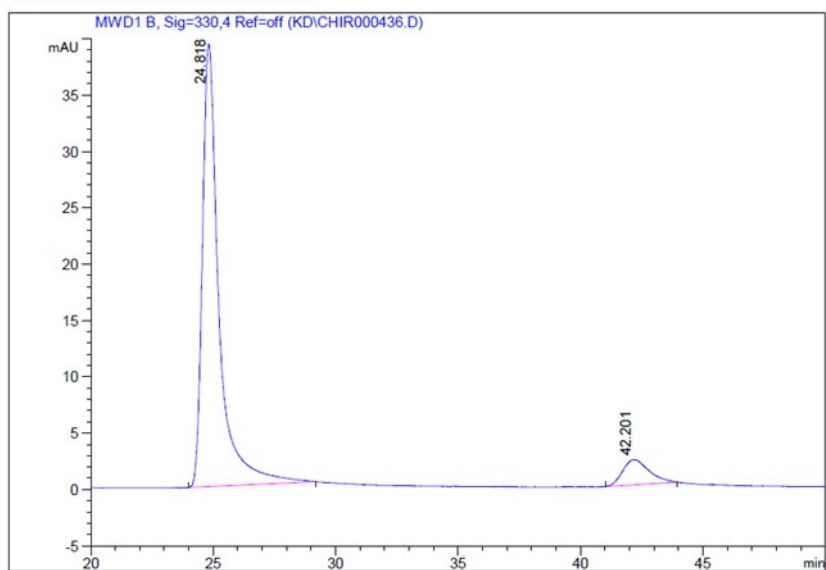

| # | Meas. R | Area    | Area % |
|---|---------|---------|--------|
| 1 | 24.818  | 1.852e3 | 91.718 |
| 2 | 42.201  | 167.205 | 8.282  |

Figure S71. HPLC chromatograms of **3baa**

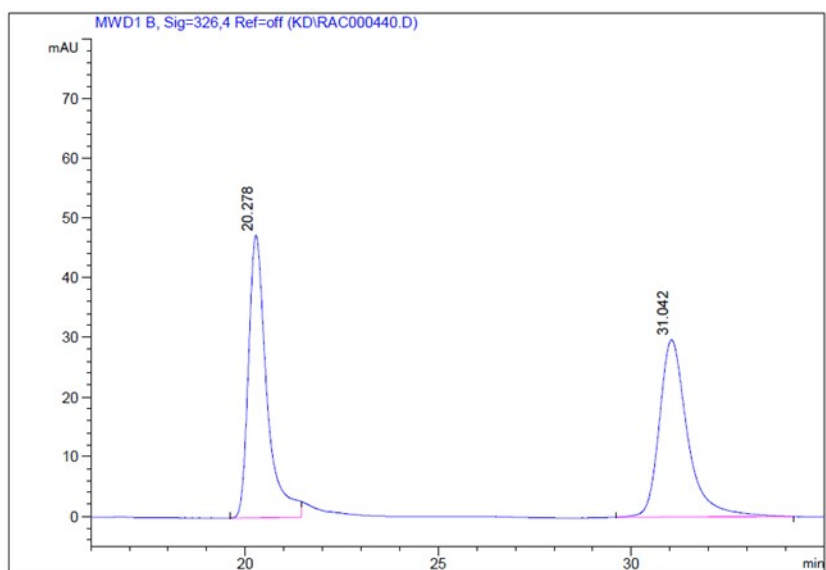

| # | Meas. R | Area    | Area % |
|---|---------|---------|--------|
| 1 | 20.278  | 1.558e3 | 50.758 |
| 2 | 31.042  | 1.512e3 | 49.242 |

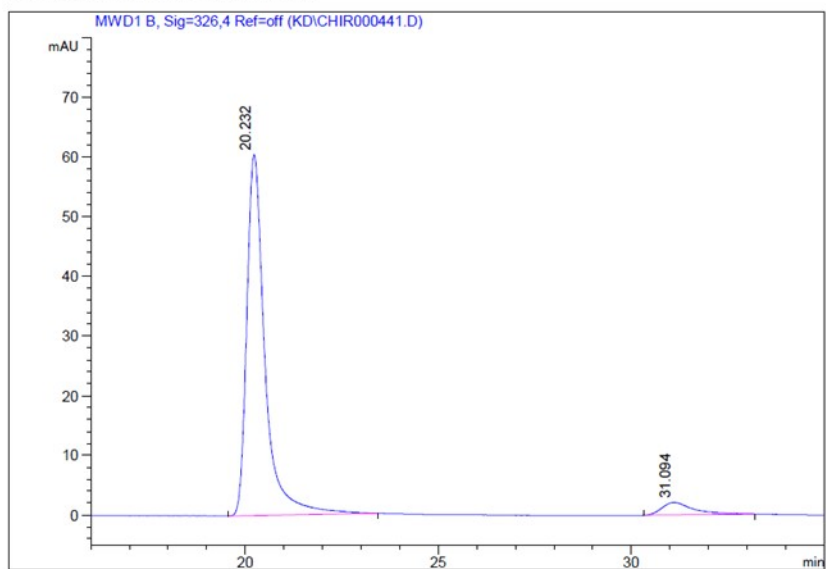

| # | Meas. R | Area    | Area % |
|---|---------|---------|--------|
| 1 | 20.232  | 1.981e3 | 94.217 |
| 2 | 31.094  | 121.595 | 5.783  |

Figure S72. HPLC chromatograms of **3ca**



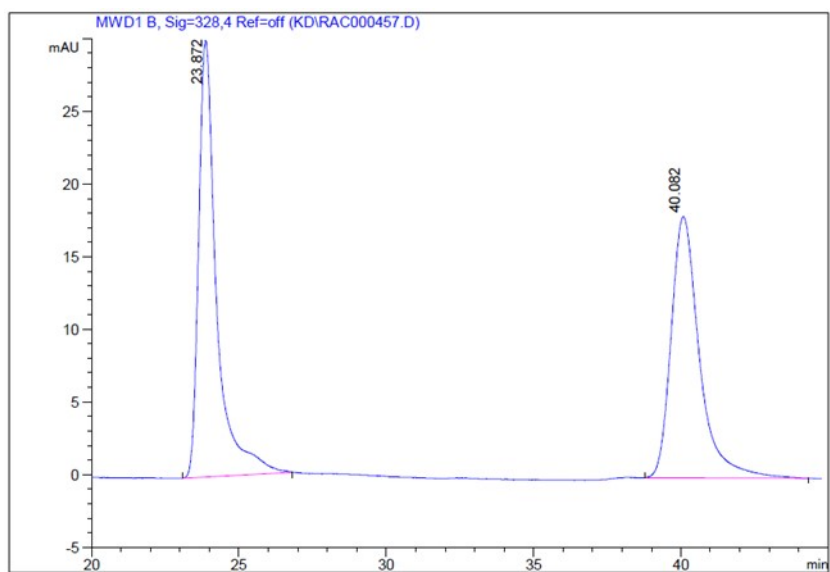

| # | Meas. R | Area    | Area % |
|---|---------|---------|--------|
| 1 | 23.872  | 1.270e3 | 51.356 |
| 2 | 40.082  | 1.203e3 | 48.644 |

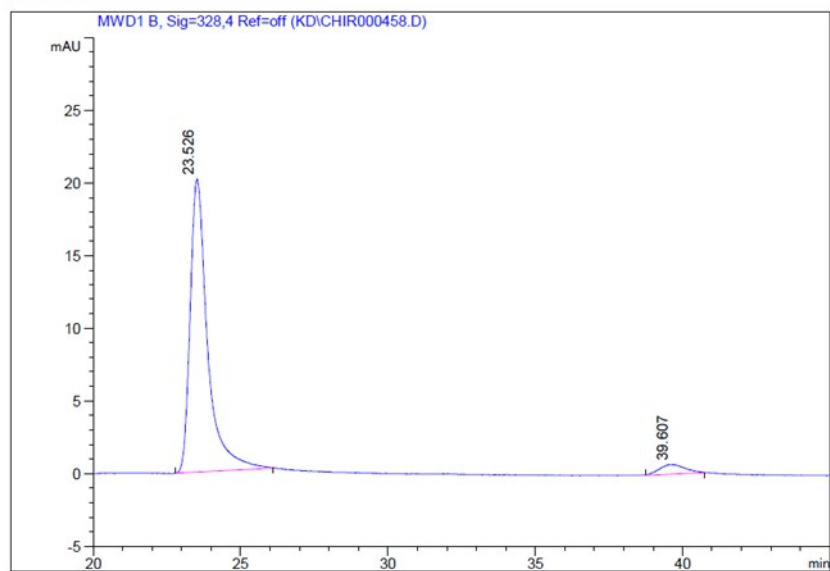

| # | Meas. R | Area    | Area % |
|---|---------|---------|--------|
| 1 | 23.526  | 827.818 | 95.468 |
| 2 | 39.607  | 39.296  | 4.532  |

Figure S73. HPLC chromatograms of **3daa**

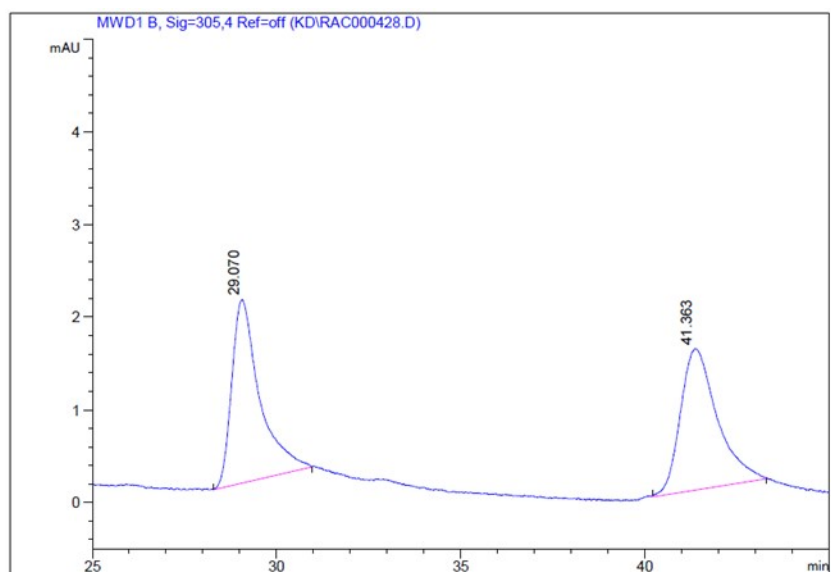

| # | Meas. R | Area    | Area % |
|---|---------|---------|--------|
| 1 | 29.070  | 104.144 | 49.549 |
| 2 | 41.363  | 106.041 | 50.451 |

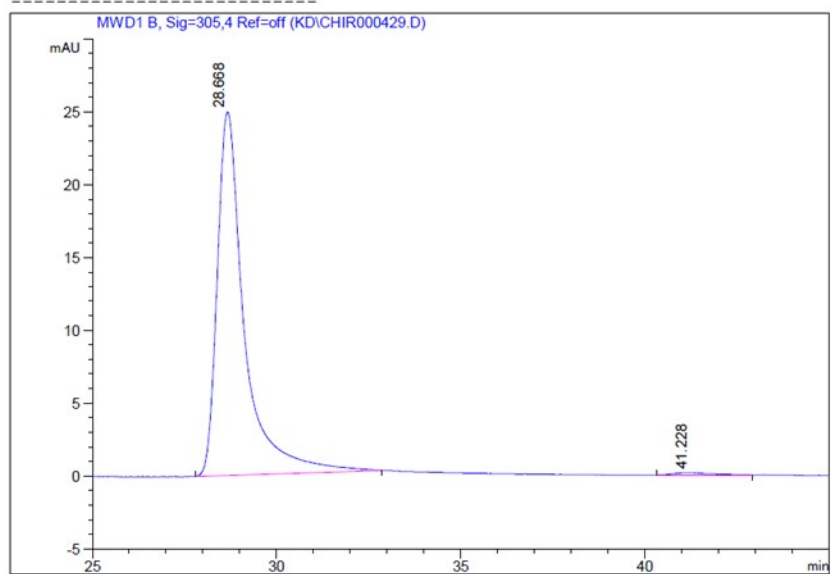

| # | Meas. R | Area    | Area % |
|---|---------|---------|--------|
| 1 | 28.668  | 1.279e3 | 99.177 |
| 2 | 41.228  | 10.608  | 0.823  |

Figure S74. HPLC chromatograms of **3ea**

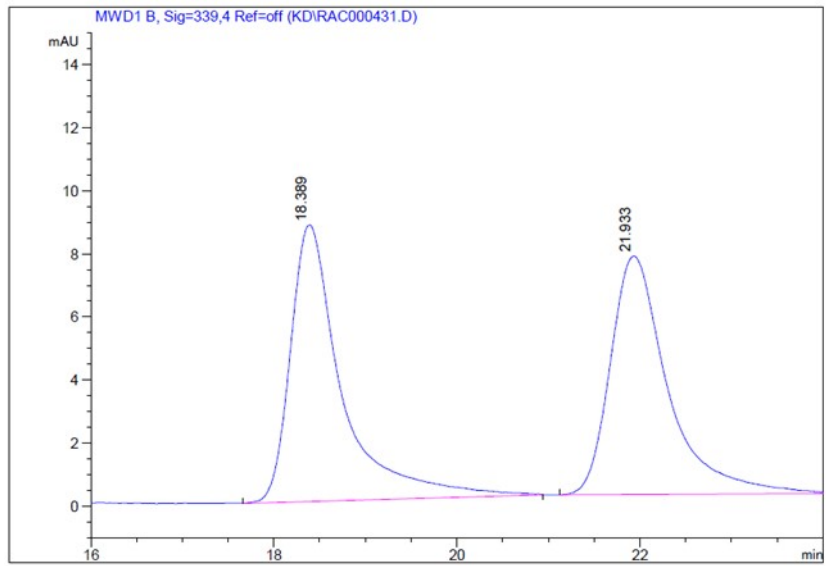

| # | Meas. R | Area    | Area % |
|---|---------|---------|--------|
| 1 | 18.389  | 342.711 | 50.891 |
| 2 | 21.933  | 330.709 | 49.109 |

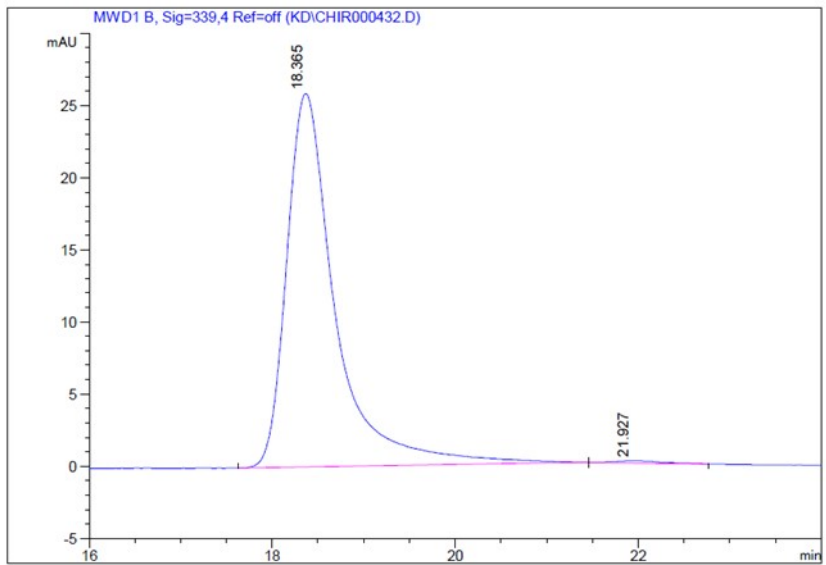

| # | Meas. R | Area    | Area % |
|---|---------|---------|--------|
| 1 | 18.365  | 959.351 | 99.343 |
| 2 | 21.927  | 6.341   | 0.657  |

Figure S75. HPLC chromatograms of **3faa**

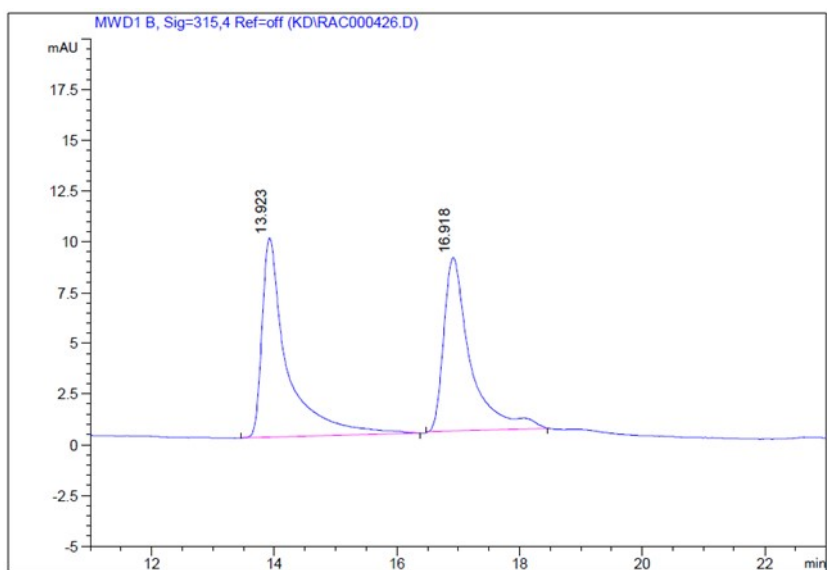

| # | Meas. R | Area    | Area % |
|---|---------|---------|--------|
| 1 | 13.923  | 280.371 | 52.113 |
| 2 | 16.918  | 257.635 | 47.887 |

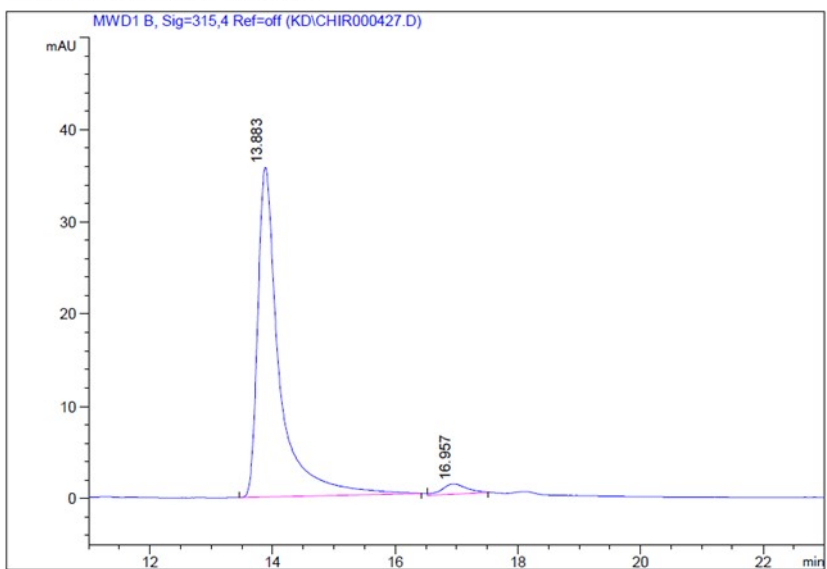

| # | Meas. R | Area    | Area % |
|---|---------|---------|--------|
| 1 | 13.883  | 878.630 | 96.538 |
| 2 | 16.957  | 31.511  | 3.462  |

Figure S76. HPLC chromatograms of **3gaa**

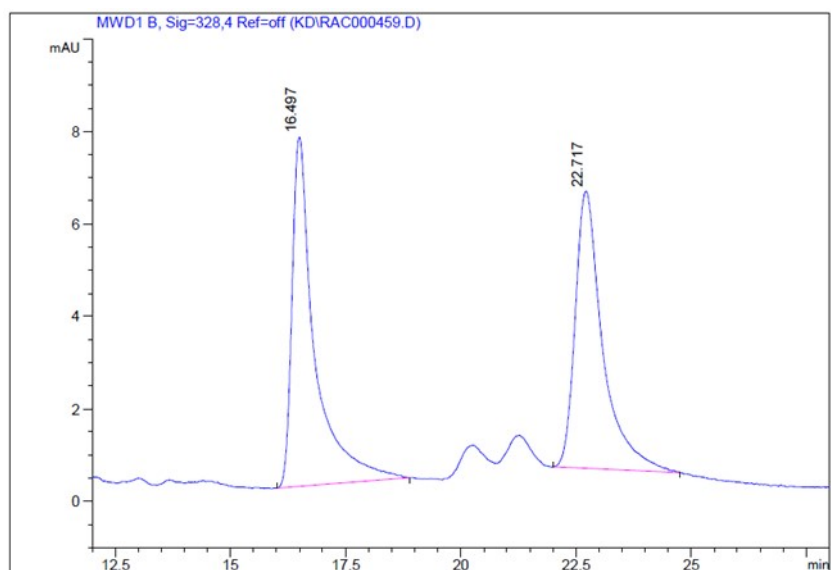

| # | Meas. R | Area    | Area % |
|---|---------|---------|--------|
| 1 | 16.497  | 259.582 | 51.032 |
| 2 | 22.717  | 249.084 | 48.968 |

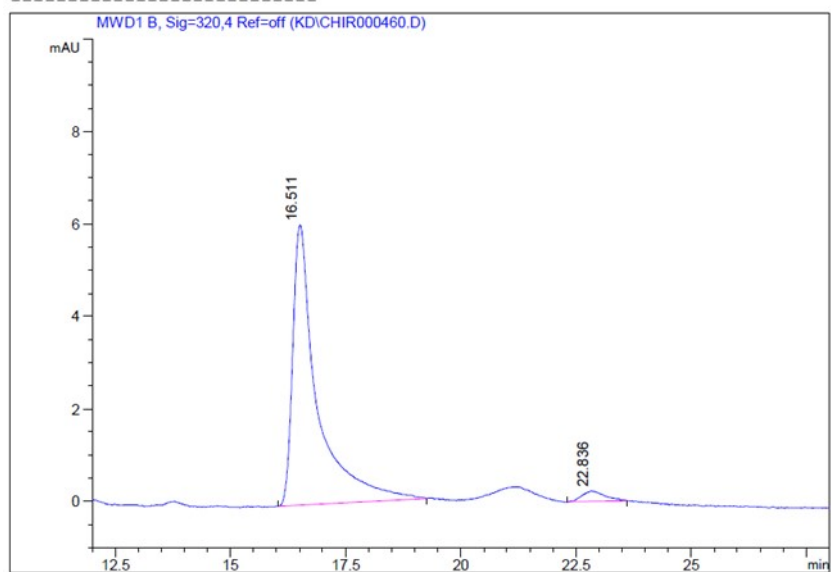

| # | Meas. R | Area    | Area % |
|---|---------|---------|--------|
| 1 | 16.511  | 224.861 | 96.738 |
| 2 | 22.836  | 7.582   | 3.262  |

Figure S77. HPLC chromatograms of **3haa**

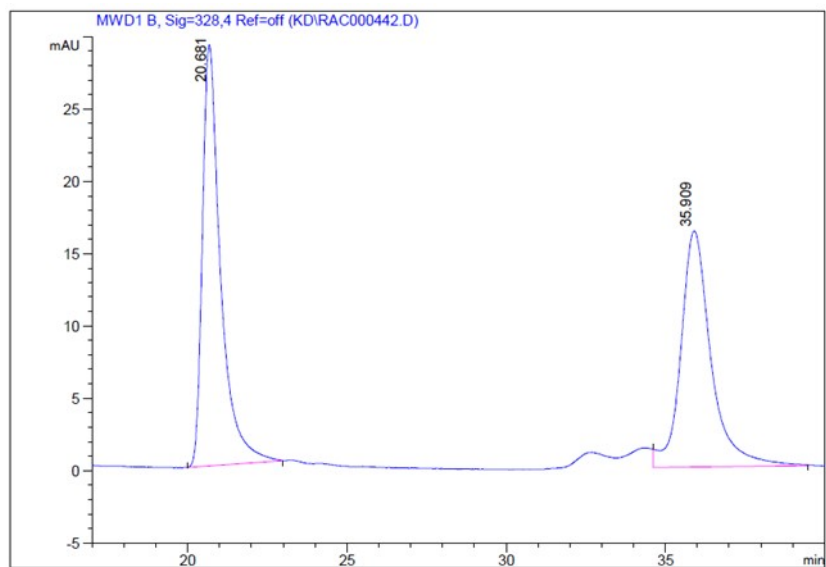

| # | Meas. R | Area    | Area % |
|---|---------|---------|--------|
| 1 | 20.681  | 1.156e3 | 51.659 |
| 2 | 35.909  | 1.081e3 | 48.341 |

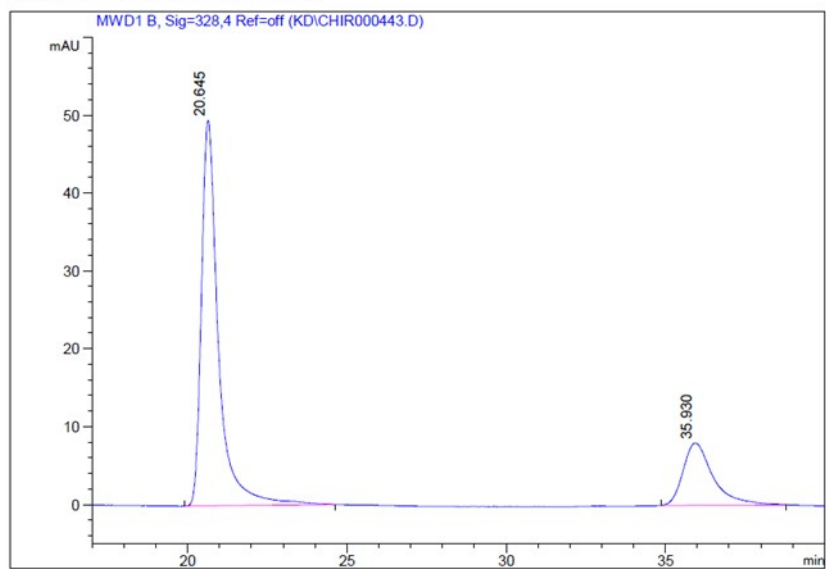

| # | Meas. R | Area    | Area % |
|---|---------|---------|--------|
| 1 | 20.645  | 1.842e3 | 77.908 |
| 2 | 35.930  | 522.449 | 22.092 |

Figure S78. HPLC chromatograms of **3iaa**

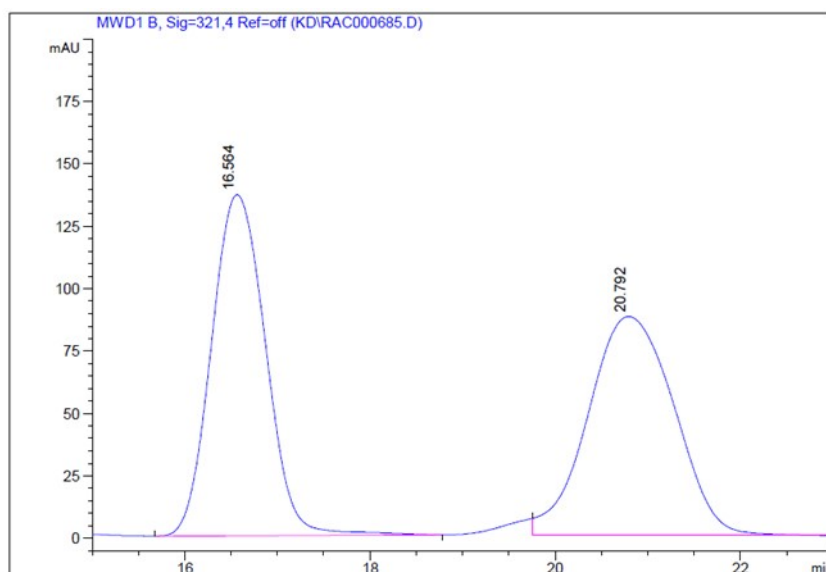

| # | Meas. R | Area    | Area % |
|---|---------|---------|--------|
| 1 | 16.564  | 5.551e3 | 49.462 |
| 2 | 20.792  | 5.672e3 | 50.538 |

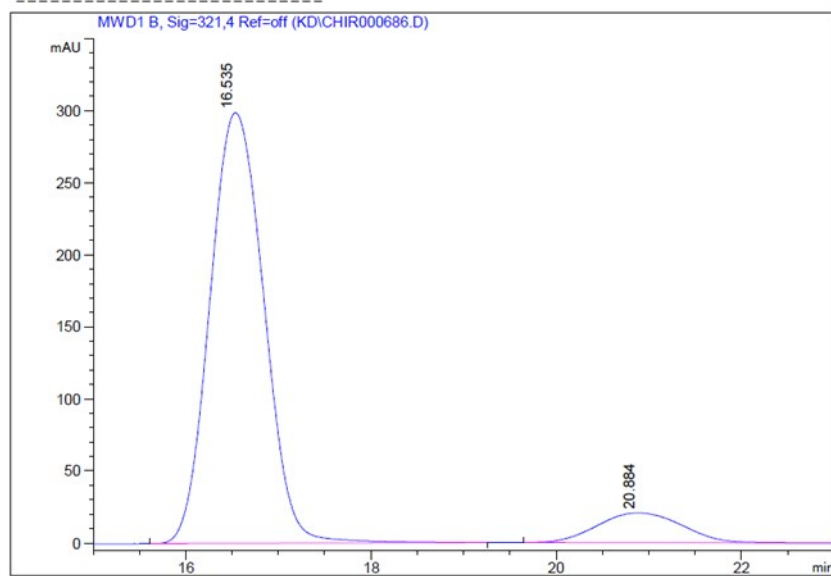

| # | Meas. R | Area    | Area % |
|---|---------|---------|--------|
| 1 | 16.535  | 1.209e4 | 90.071 |
| 2 | 20.884  | 1.333e3 | 9.929  |

Figure S79. HPLC chromatograms of **3aba**

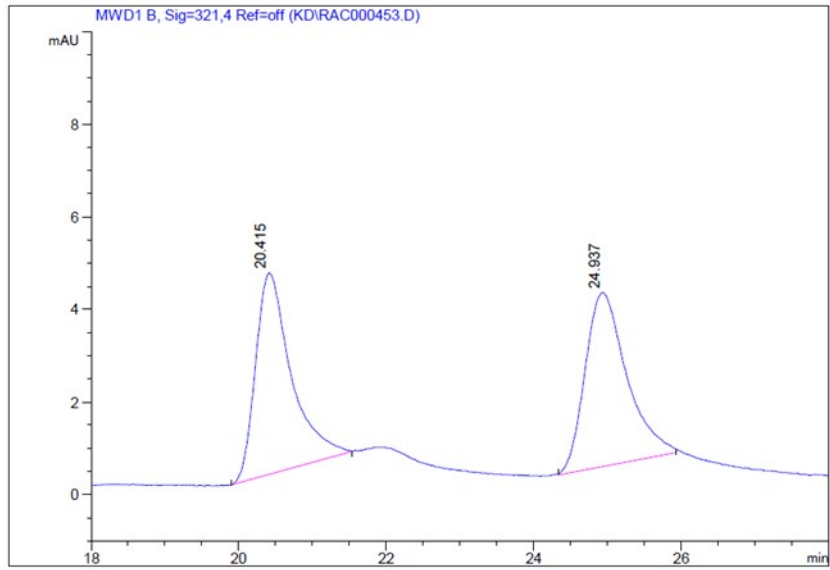

| # | Meas. R | Area    | Area % |
|---|---------|---------|--------|
| 1 | 20.415  | 145.844 | 49.722 |
| 2 | 24.937  | 147.476 | 50.278 |

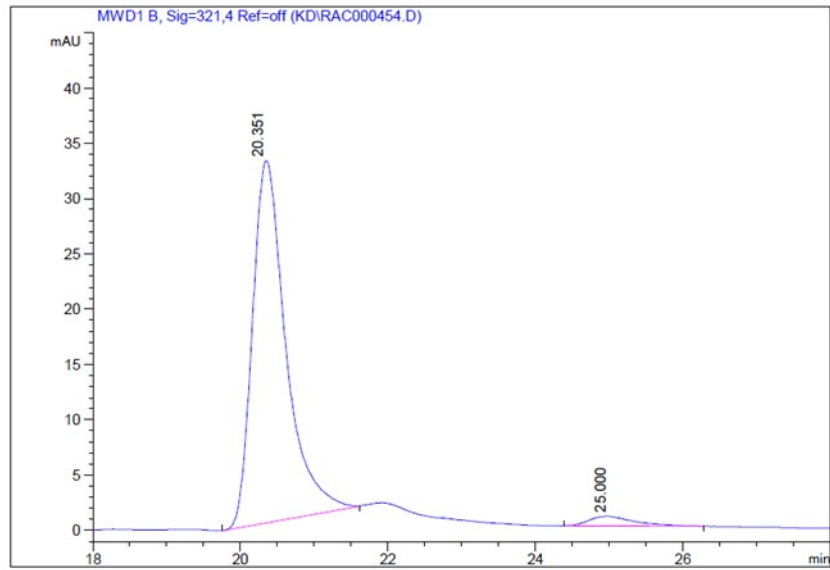

| # | Meas. R | Area    | Area % |
|---|---------|---------|--------|
| 1 | 20.351  | 1.033e3 | 96.492 |
| 2 | 25.000  | 37.570  | 3.508  |

Figure S80. HPLC chromatograms of **3aca**



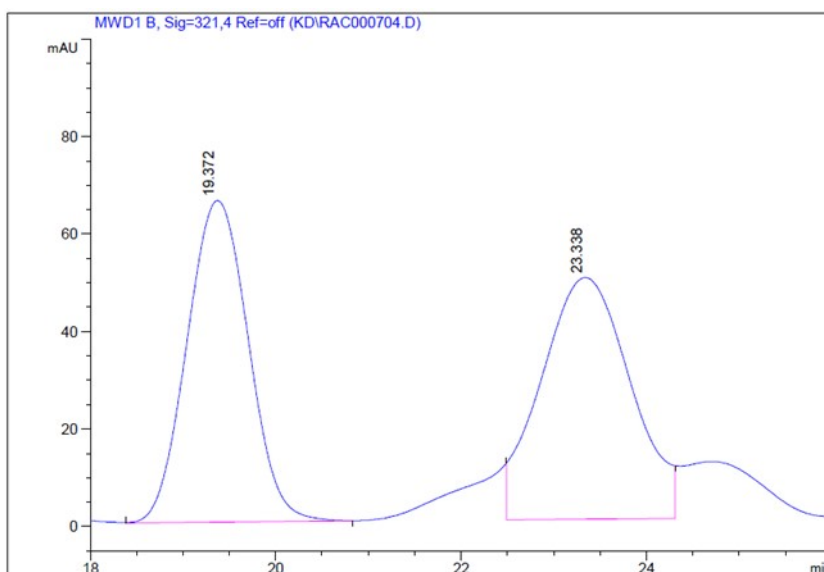

| # | Meas. R | Area    | Area % |
|---|---------|---------|--------|
| 1 | 19.372  | 3.029e3 | 47.708 |
| 2 | 23.338  | 3.320e3 | 52.292 |

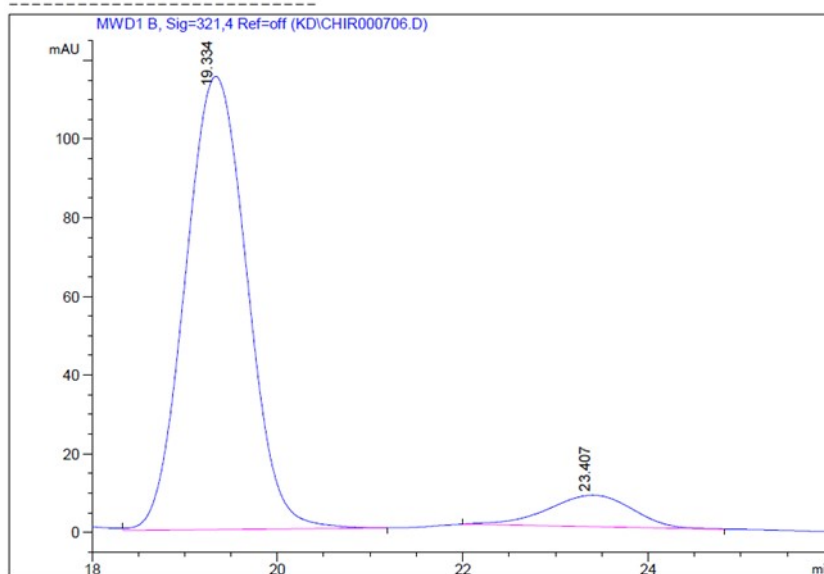

| # | Meas. R | Area    | Area % |
|---|---------|---------|--------|
| 1 | 19.334  | 5.320e3 | 91.390 |
| 2 | 23.407  | 501.165 | 8.610  |

Figure S81. HPLC chromatograms of **3ada**

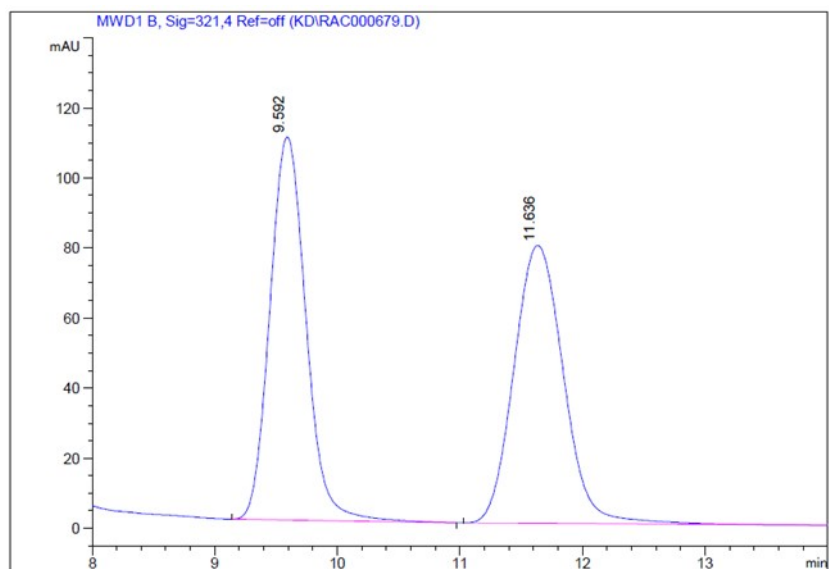

| # | Meas. R | Area    | Area % |
|---|---------|---------|--------|
| 1 | 9.592   | 2.234e3 | 49.897 |
| 2 | 11.636  | 2.243e3 | 50.103 |

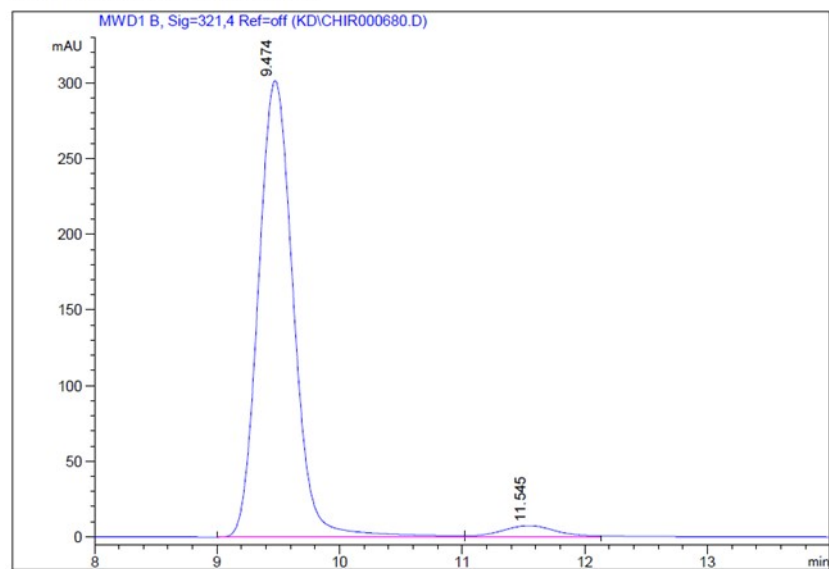

| # | Meas. R | Area    | Area % |
|---|---------|---------|--------|
| 1 | 9.474   | 5.970e3 | 96.078 |
| 2 | 11.545  | 243.701 | 3.922  |

Figure S82. HPLC chromatograms of **3aea**

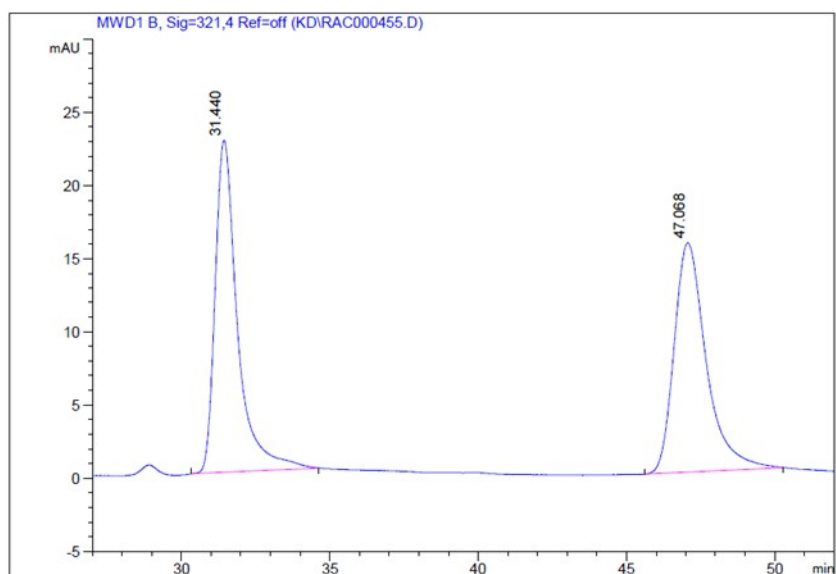

| # | Meas. R | Area    | Area % |
|---|---------|---------|--------|
| 1 | 31.440  | 1.191e3 | 50.209 |
| 2 | 47.068  | 1.181e3 | 49.791 |

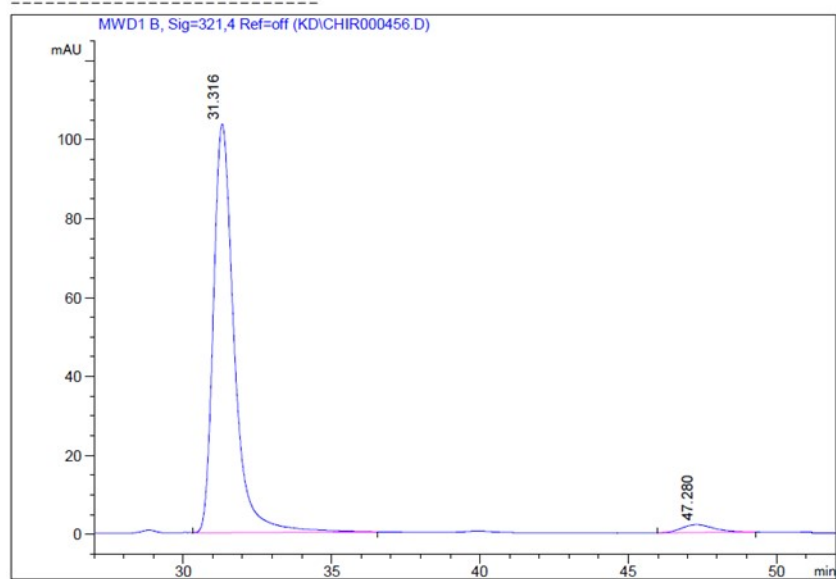

| # | Meas. R | Area    | Area % |
|---|---------|---------|--------|
| 1 | 31.316  | 5.029e3 | 97.024 |
| 2 | 47.280  | 154.279 | 2.976  |

Figure S83. HPLC chromatograms of **3afa**

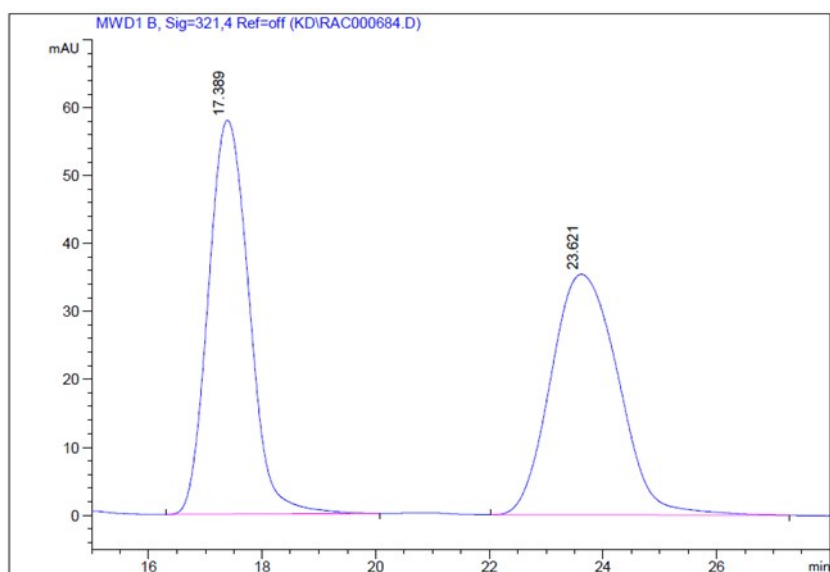

| # | Meas. R | Area    | Area % |
|---|---------|---------|--------|
| 1 | 17.389  | 2.892e3 | 49.699 |
| 2 | 23.621  | 2.927e3 | 50.301 |

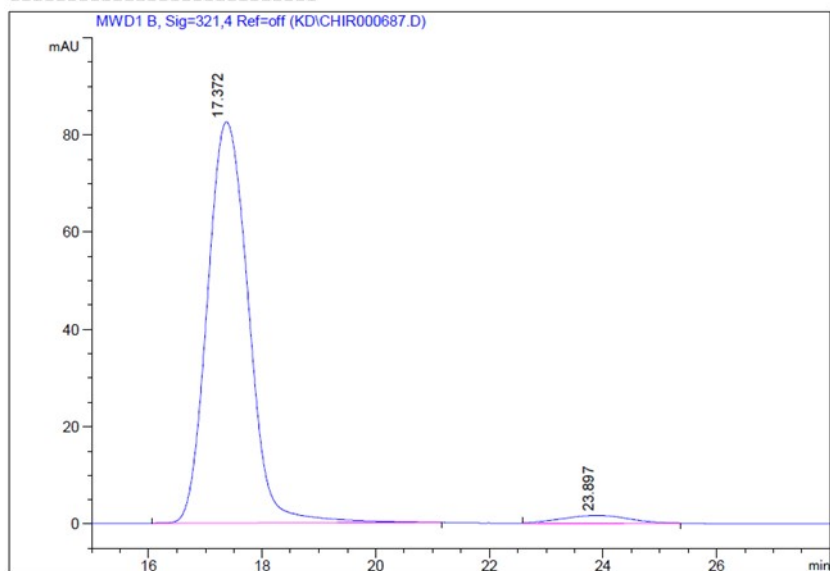

| # | Meas. R | Area    | Area % |
|---|---------|---------|--------|
| 1 | 17.372  | 4.129e3 | 96.727 |
| 2 | 23.897  | 139.735 | 3.273  |

Figure S84. HPLC chromatograms of **3ga**

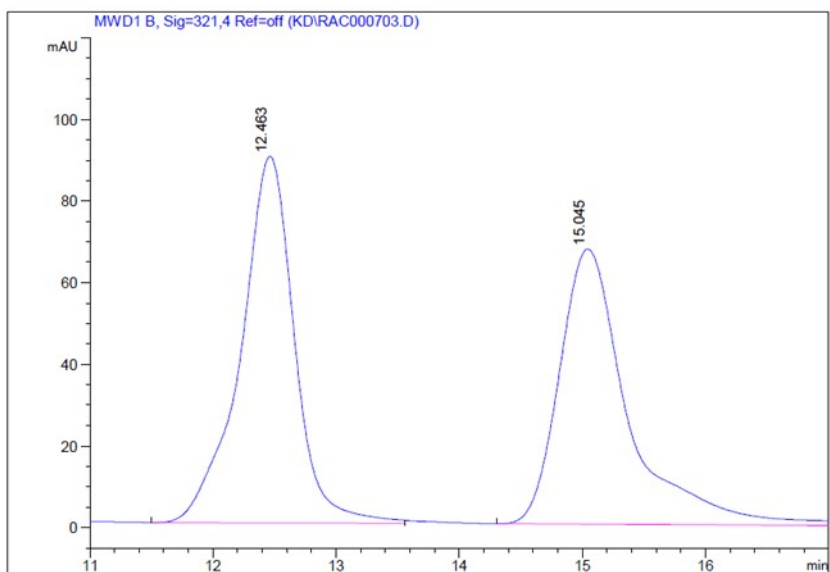

| # | Meas. R | Area    | Area % |
|---|---------|---------|--------|
| 1 | 12.463  | 2.723e3 | 50.868 |
| 2 | 15.045  | 2.630e3 | 49.132 |

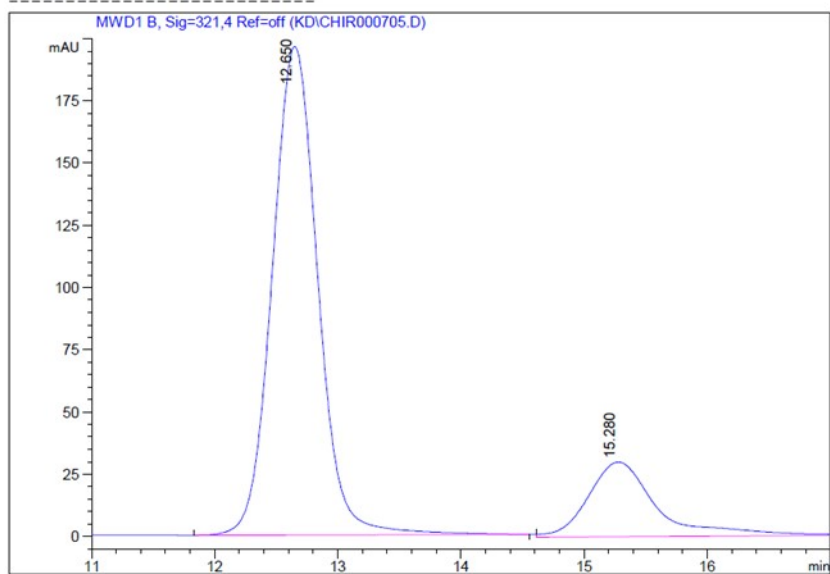

| # | Meas. R | Area    | Area % |
|---|---------|---------|--------|
| 1 | 12.650  | 5.038e3 | 81.259 |
| 2 | 15.280  | 1.162e3 | 18.741 |

Figure S85. HPLC chromatograms of **3aha**

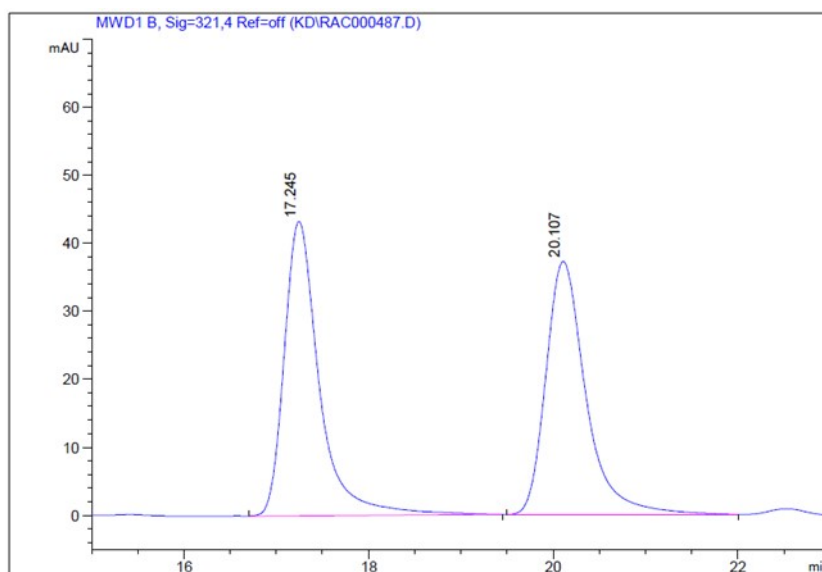

| # | Meas. R | Area    | Area % |
|---|---------|---------|--------|
| 1 | 17.245  | 1.145e3 | 50.498 |
| 2 | 20.107  | 1.122e3 | 49.502 |

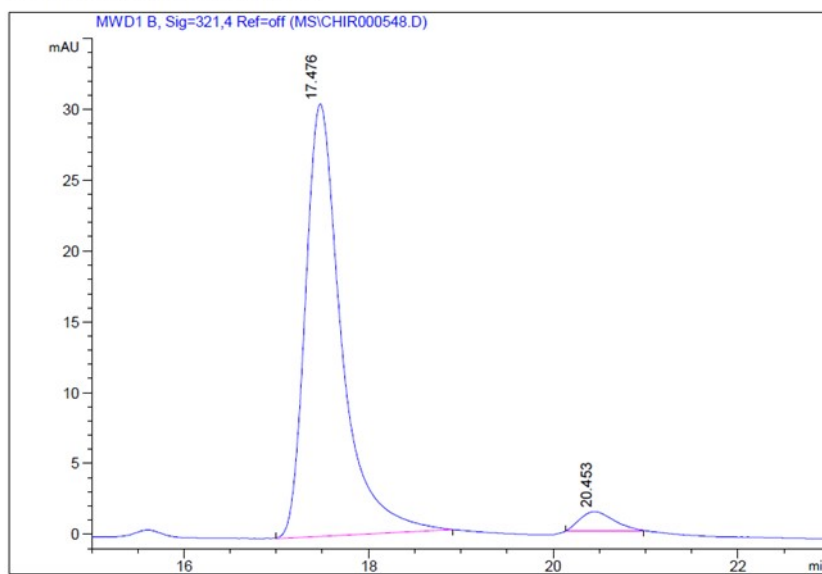

| # | Meas. R | Area    | Area % |
|---|---------|---------|--------|
| 1 | 17.476  | 827.696 | 95.806 |
| 2 | 20.453  | 36.236  | 4.194  |

Figure S86. HPLC chromatograms of **3aia**

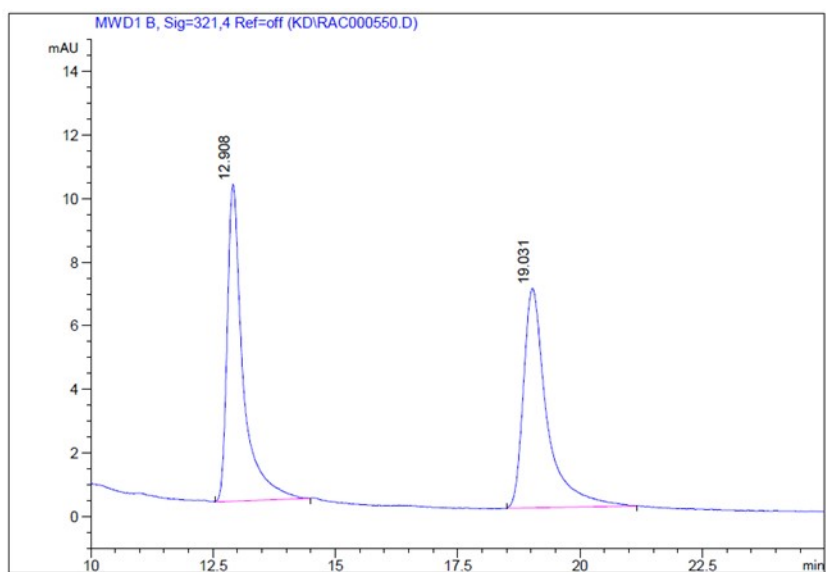

| # | Meas. R | Area    | Area % |
|---|---------|---------|--------|
| 1 | 12.908  | 222.606 | 49.117 |
| 2 | 19.031  | 230.612 | 50.883 |

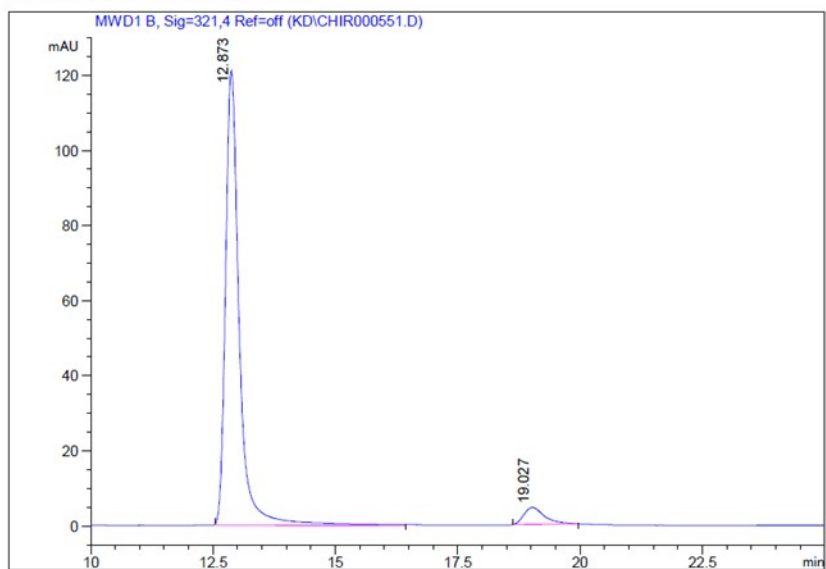

| # | Meas. R | Area    | Area % |
|---|---------|---------|--------|
| 1 | 12.873  | 2.363e3 | 94.718 |
| 2 | 19.027  | 131.750 | 5.282  |

Figure S87. HPLC chromatograms of **3aja**

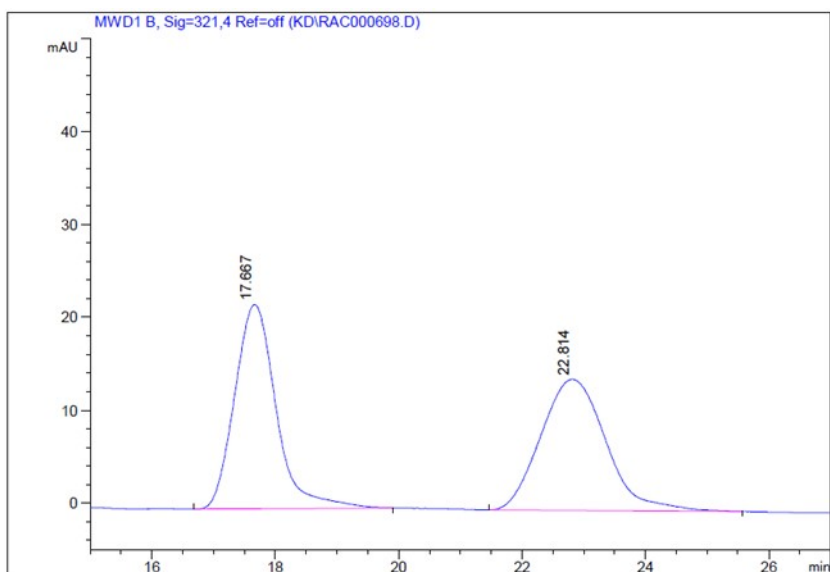

| # | Meas. R | Area    | Area % |
|---|---------|---------|--------|
| 1 | 17.667  | 1.028e3 | 49.804 |
| 2 | 22.814  | 1.036e3 | 50.196 |

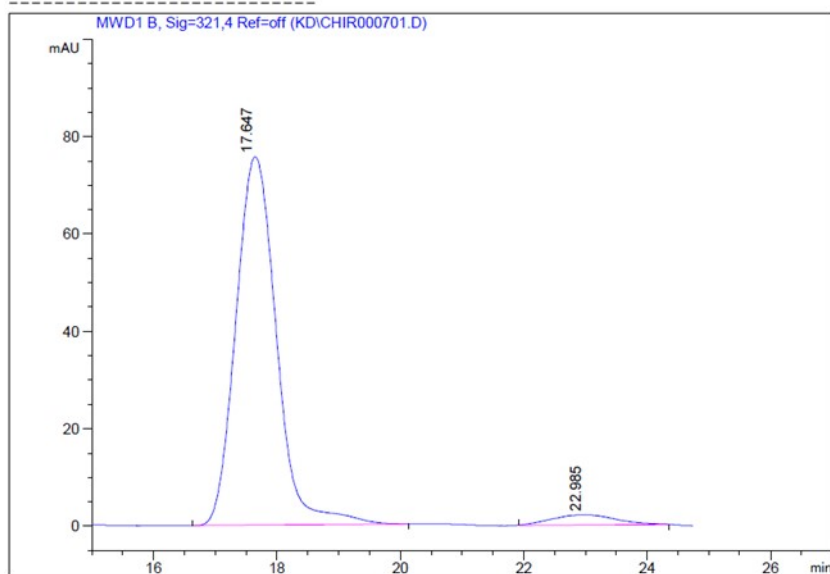

| # | Meas. R | Area    | Area % |
|---|---------|---------|--------|
| 1 | 17.647  | 3.458e3 | 95.745 |
| 2 | 22.985  | 153.688 | 4.255  |

Figure S88. HPLC chromatograms of **3aka**



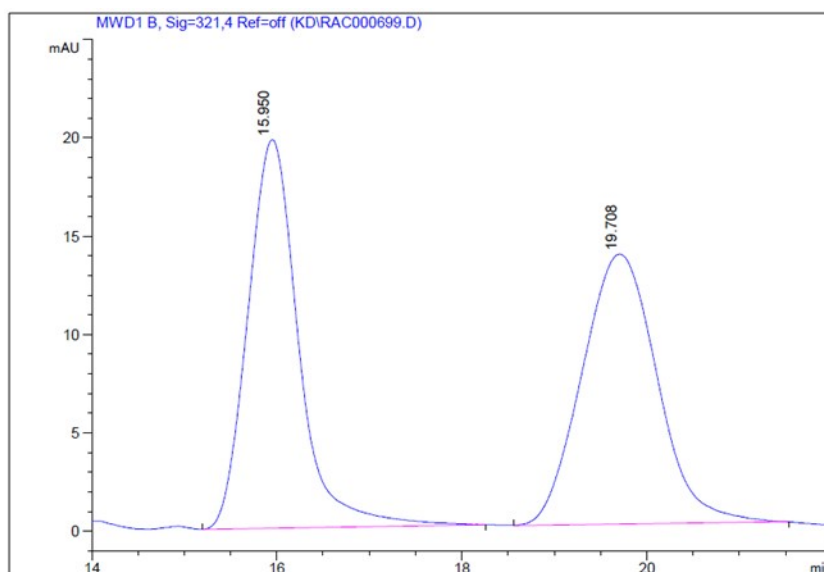

| # | Meas. R | Area    | Area % |
|---|---------|---------|--------|
| 1 | 15.950  | 753.543 | 49.327 |
| 2 | 19.708  | 774.097 | 50.673 |

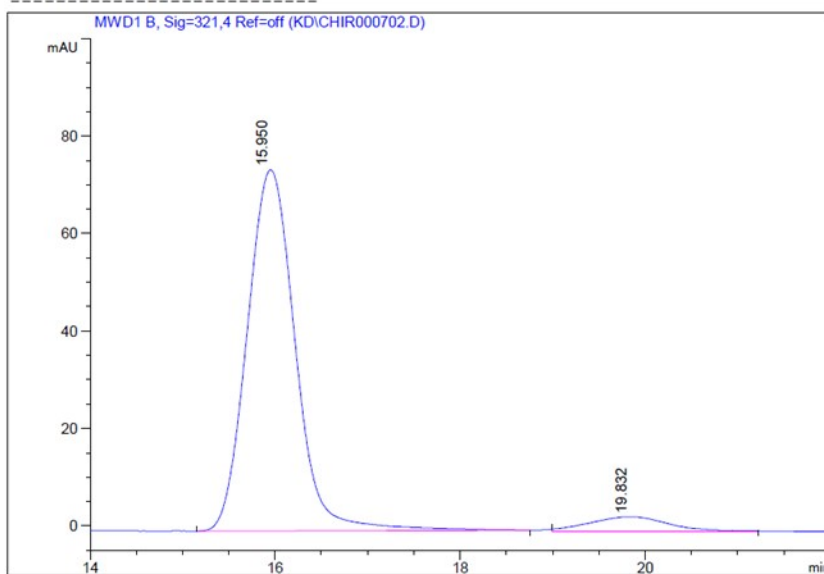

| # | Meas. R | Area    | Area % |
|---|---------|---------|--------|
| 1 | 15.950  | 2.673e3 | 93.445 |
| 2 | 19.832  | 187.483 | 6.555  |

Figure S89. HPLC chromatograms of **3ala**

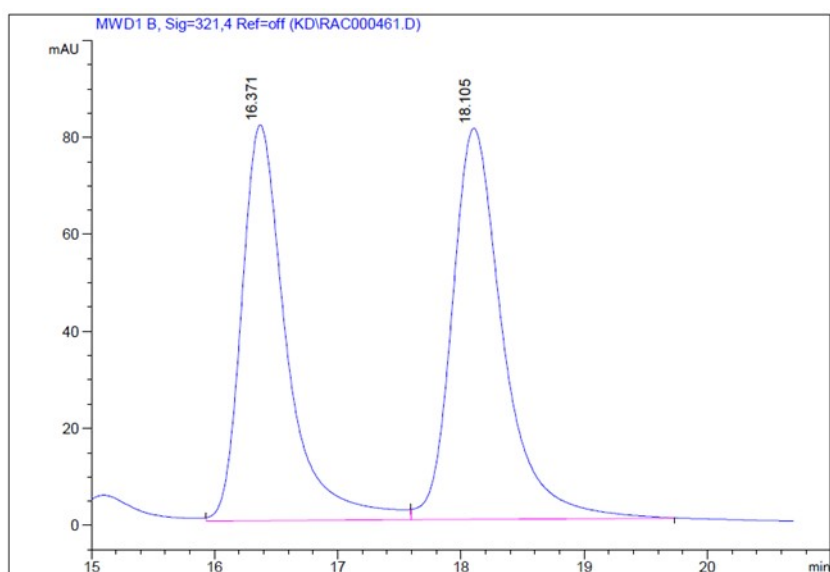

| # | Meas. R | Area    | Area % |
|---|---------|---------|--------|
| 1 | 16.371  | 2.080e3 | 47.305 |
| 2 | 18.105  | 2.317e3 | 52.695 |

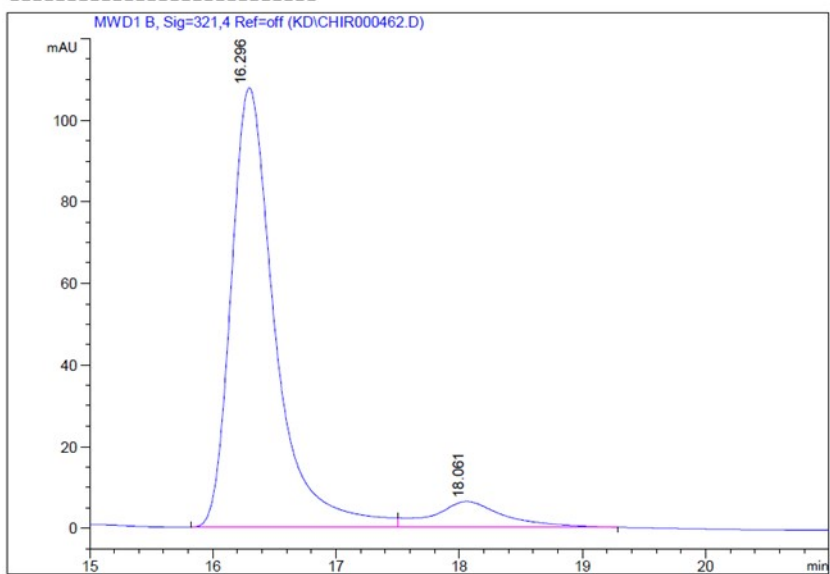

| # | Meas. R | Area    | Area % |
|---|---------|---------|--------|
| 1 | 16.296  | 2.671e3 | 91.244 |
| 2 | 18.061  | 256.346 | 8.756  |

Figure S90. HPLC chromatograms of **3ama**

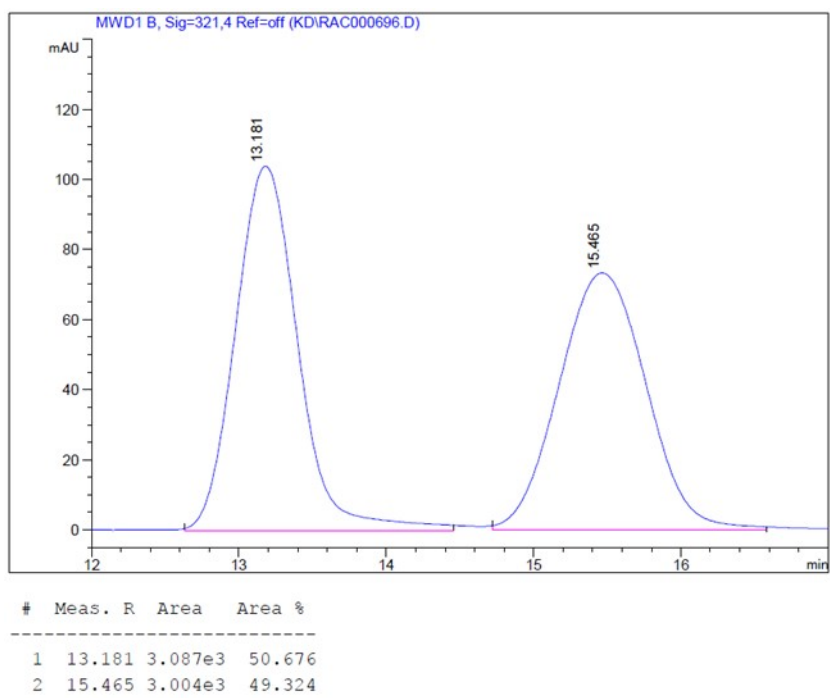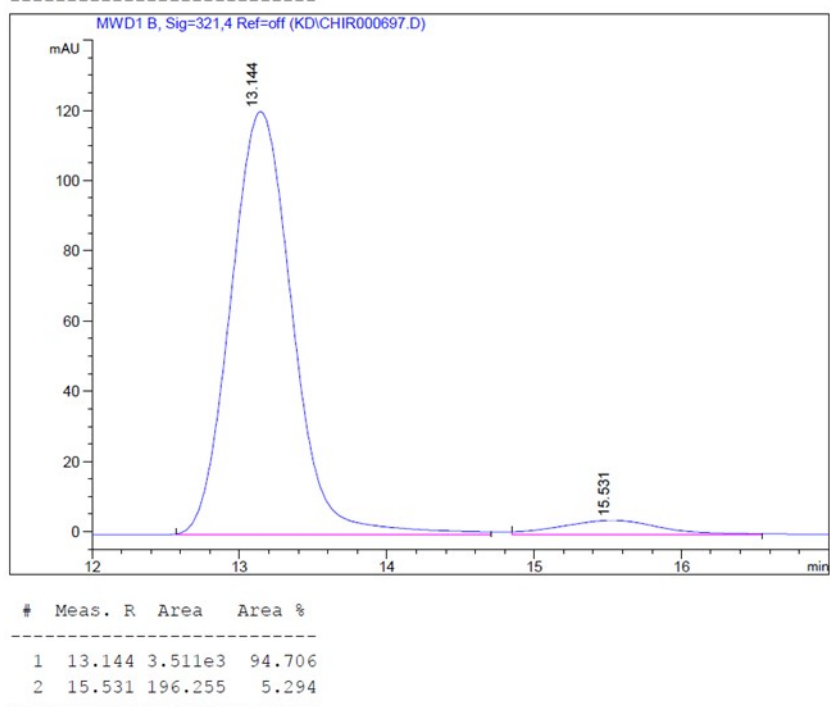

Figure S91. HPLC chromatogram of **3ana**

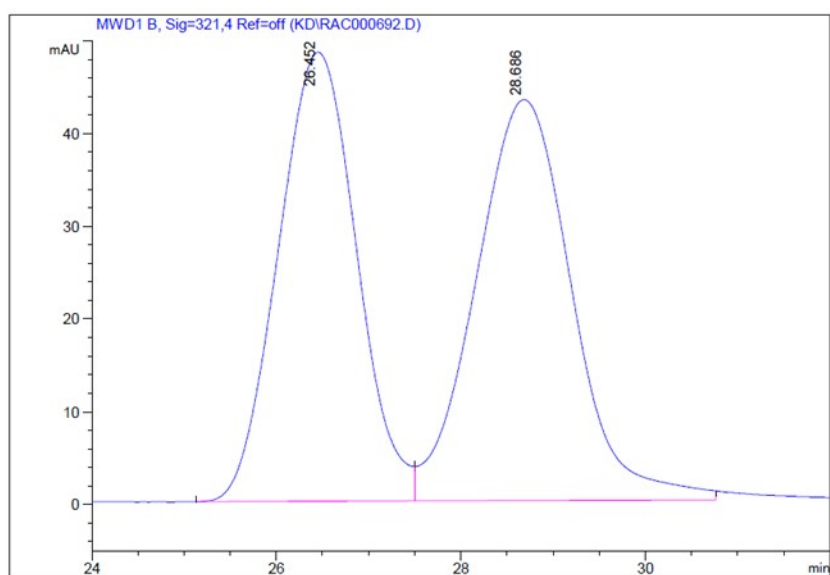

| # | Meas. R | Area    | Area % |
|---|---------|---------|--------|
| 1 | 26.452  | 2.853e3 | 47.740 |
| 2 | 28.686  | 3.123e3 | 52.260 |

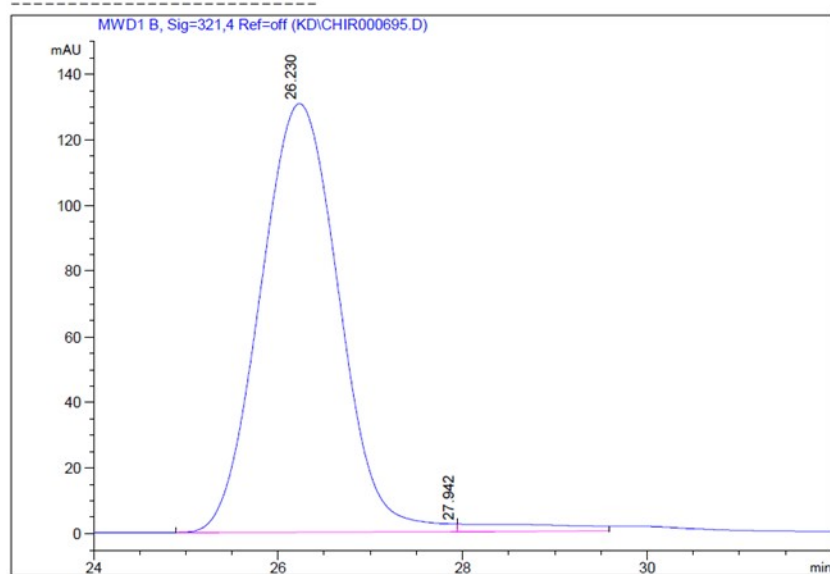

| # | Meas. R | Area    | Area % |
|---|---------|---------|--------|
| 1 | 26.230  | 7.708e3 | 97.612 |
| 2 | 27.942  | 188.588 | 2.388  |

Figure S92. HPLC chromatograms of **3a0a**

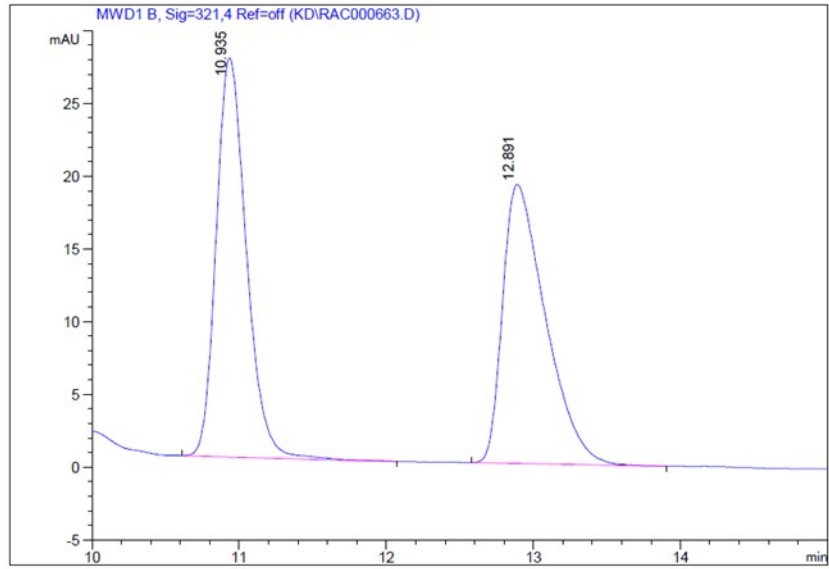

| # | Meas. R | Area    | Area % |
|---|---------|---------|--------|
| 1 | 10.935  | 390.622 | 50.087 |
| 2 | 12.891  | 389.265 | 49.913 |

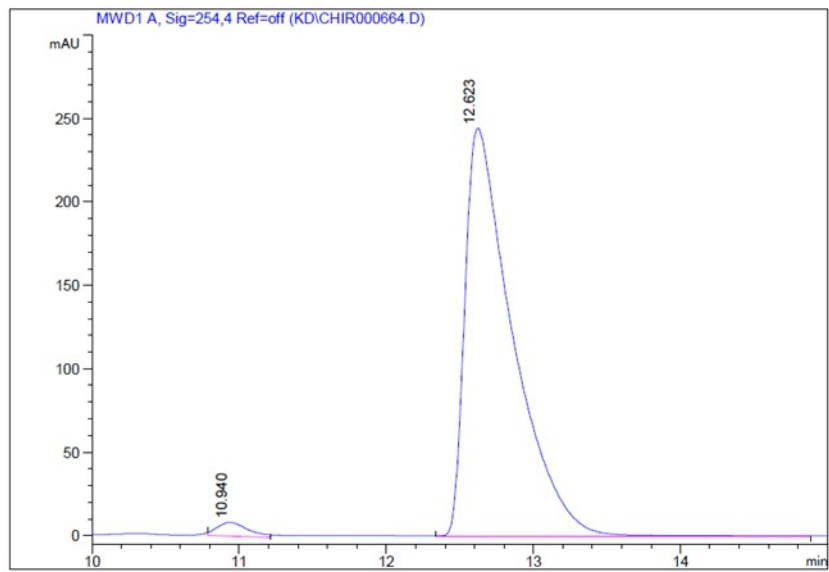

| # | Meas. R | Area    | Area % |
|---|---------|---------|--------|
| 1 | 10.940  | 118.741 | 2.117  |
| 2 | 12.623  | 5.491e3 | 97.883 |

Figure S93. HPLC chromatograms of **3apa**

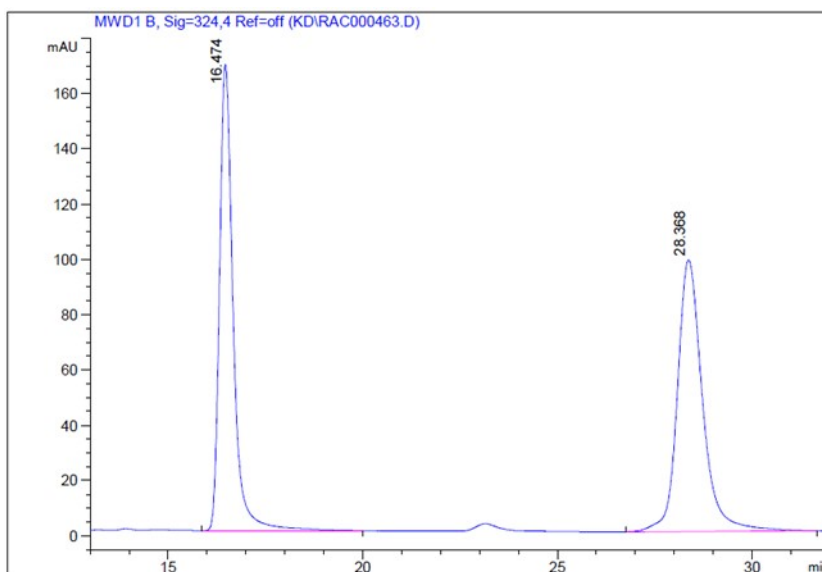

| # | Meas. R | Area    | Area % |
|---|---------|---------|--------|
| 1 | 16.474  | 4.097e3 | 48.130 |
| 2 | 28.368  | 4.416e3 | 51.870 |

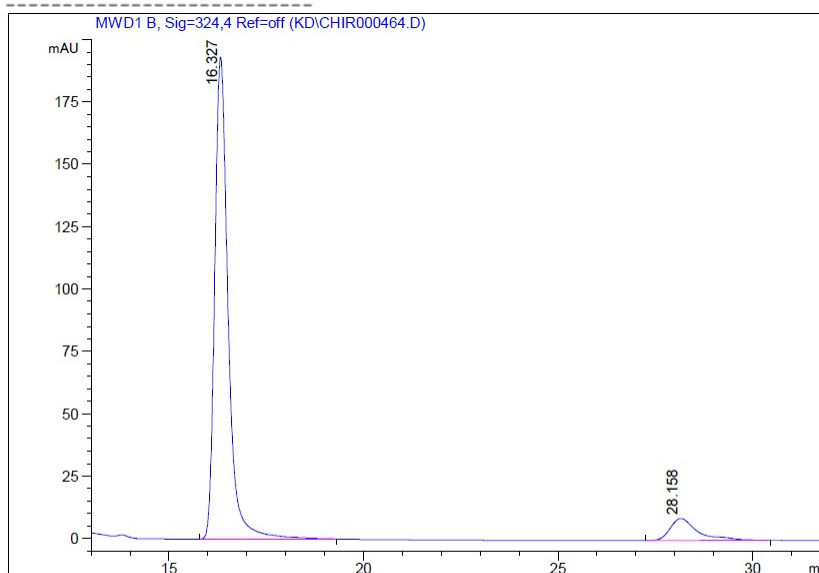

| # | Meas. R | Area    | Area % |
|---|---------|---------|--------|
| 1 | 16.327  | 4.618e3 | 91.405 |
| 2 | 28.158  | 434.194 | 8.595  |

Figure S94. HPLC chromatograms of **3aab**

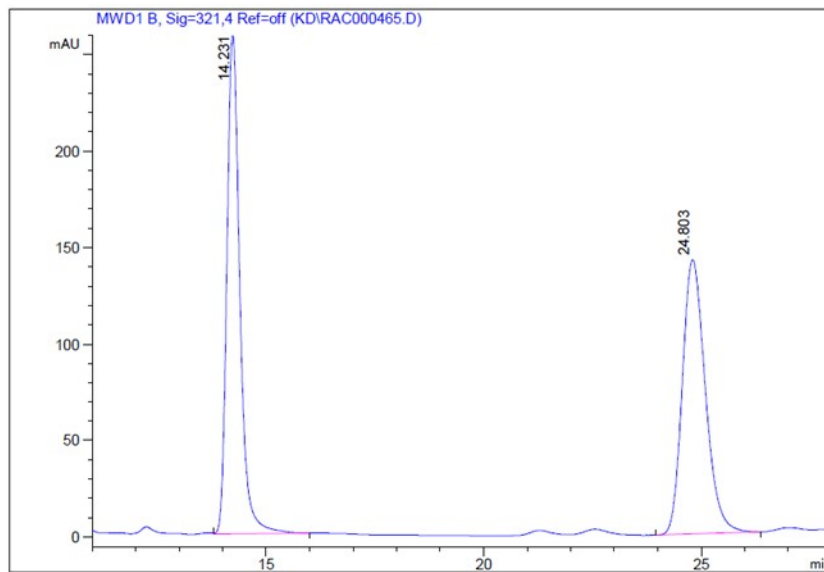

| # | Meas. R | Area    | Area % |
|---|---------|---------|--------|
| 1 | 14.231  | 5.345e3 | 50.570 |
| 2 | 24.803  | 5.224e3 | 49.430 |

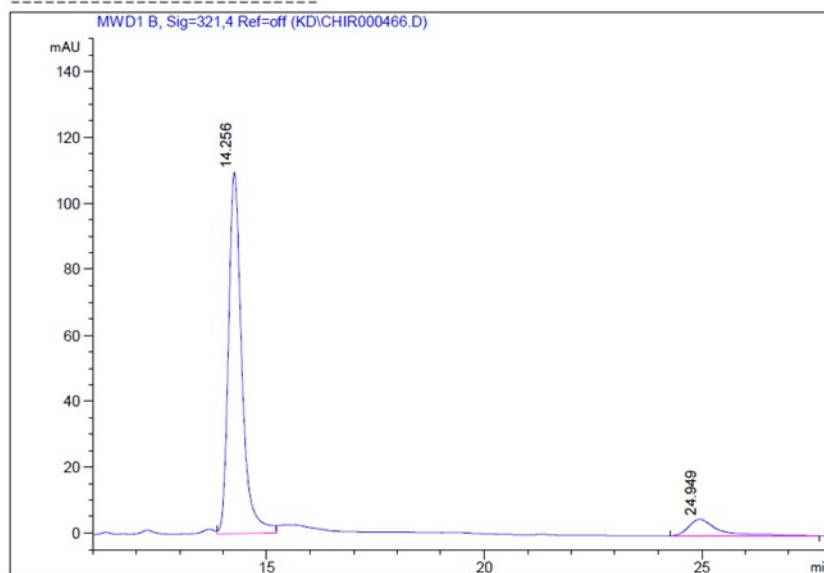

| # | Meas. R | Area    | Area % |
|---|---------|---------|--------|
| 1 | 14.256  | 2.327e3 | 90.965 |
| 2 | 24.949  | 231.141 | 9.035  |

Figure S95. HPLC chromatograms of **3aac**

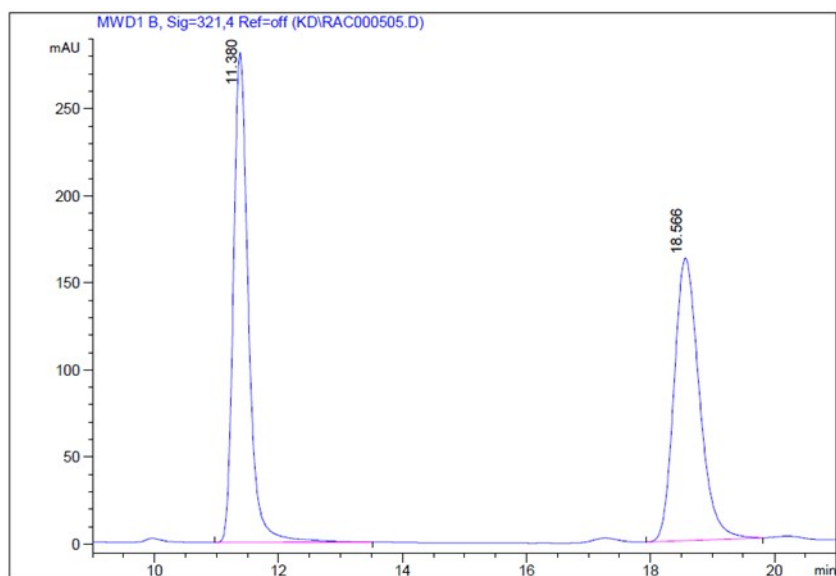

| # | Meas. R | Area    | Area % |
|---|---------|---------|--------|
| 1 | 11.380  | 4.743e3 | 50.775 |
| 2 | 18.566  | 4.598e3 | 49.225 |

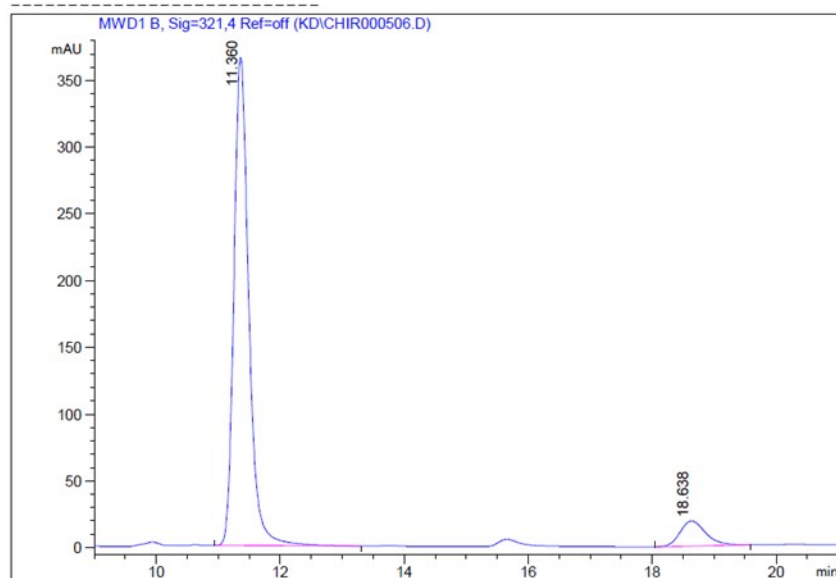

| # | Meas. R | Area    | Area % |
|---|---------|---------|--------|
| 1 | 11.360  | 6.100e3 | 91.803 |
| 2 | 18.638  | 544.644 | 8.197  |

Figure S96. HPLC chromatograms of 3aad



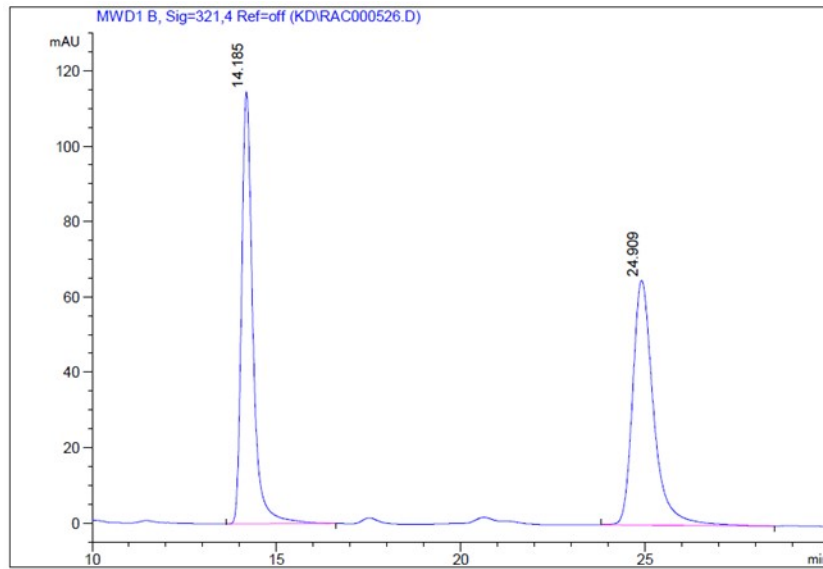

| # | Meas. R | Area    | Area % |
|---|---------|---------|--------|
| 1 | 14.185  | 2.439e3 | 48.850 |
| 2 | 24.909  | 2.553e3 | 51.150 |

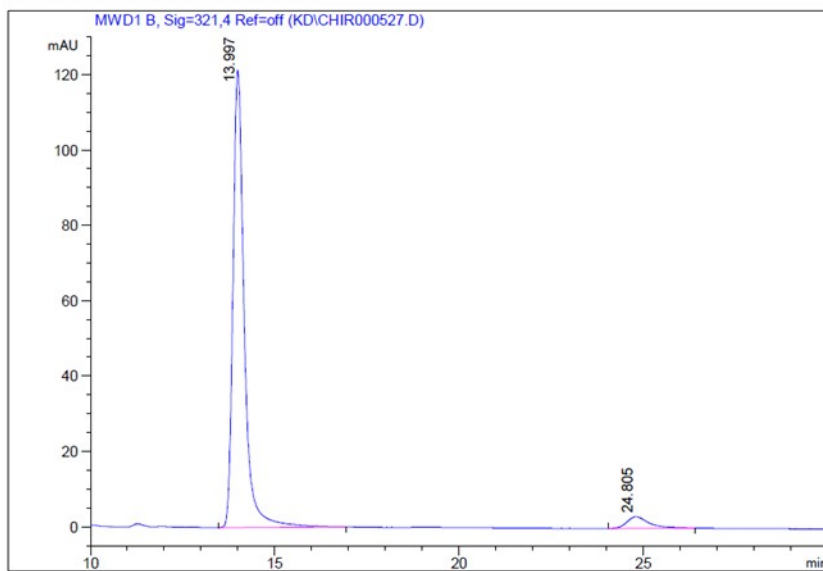

| # | Meas. R | Area    | Area % |
|---|---------|---------|--------|
| 1 | 13.997  | 2.572e3 | 95.164 |
| 2 | 24.805  | 130.694 | 4.836  |

Figure S97. HPLC chromatograms of **3aae**

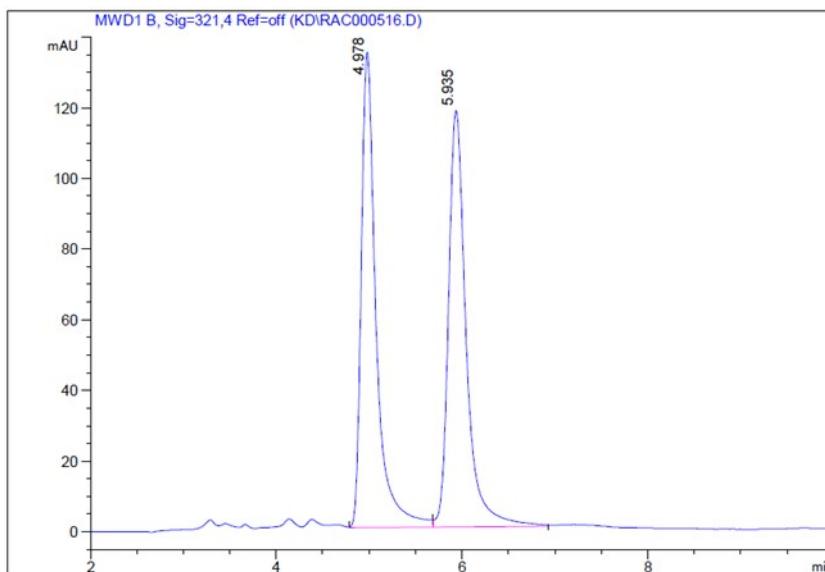

| # | Meas. R | Area    | Area % |
|---|---------|---------|--------|
| 1 | 4.978   | 1.494e3 | 48.993 |
| 2 | 5.935   | 1.555e3 | 51.007 |

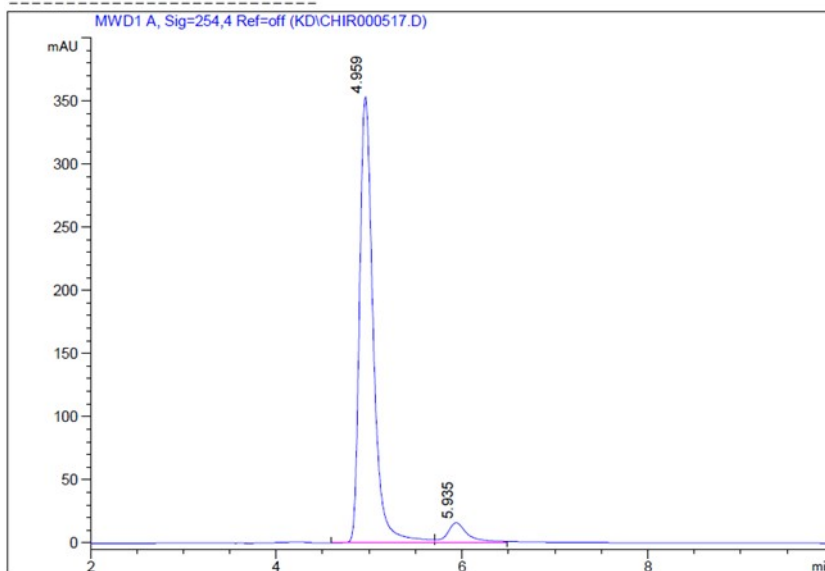

| # | Meas. R | Area    | Area % |
|---|---------|---------|--------|
| 1 | 4.959   | 3.603e3 | 93.256 |
| 2 | 5.935   | 260.544 | 6.744  |

Figure S98. HPLC chromatograms of 3aaf

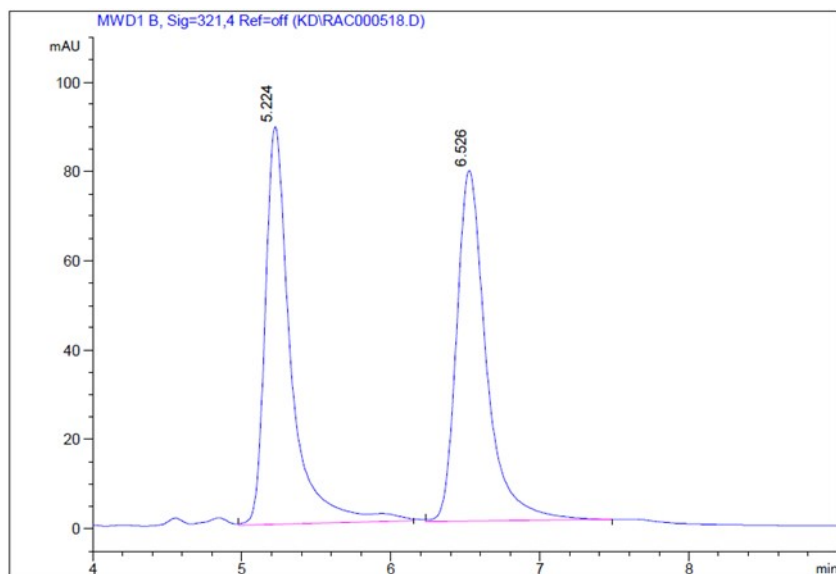

| # | Meas. R | Area    | Area % |
|---|---------|---------|--------|
| 1 | 5.224   | 1.068e3 | 49.576 |
| 2 | 6.526   | 1.086e3 | 50.424 |

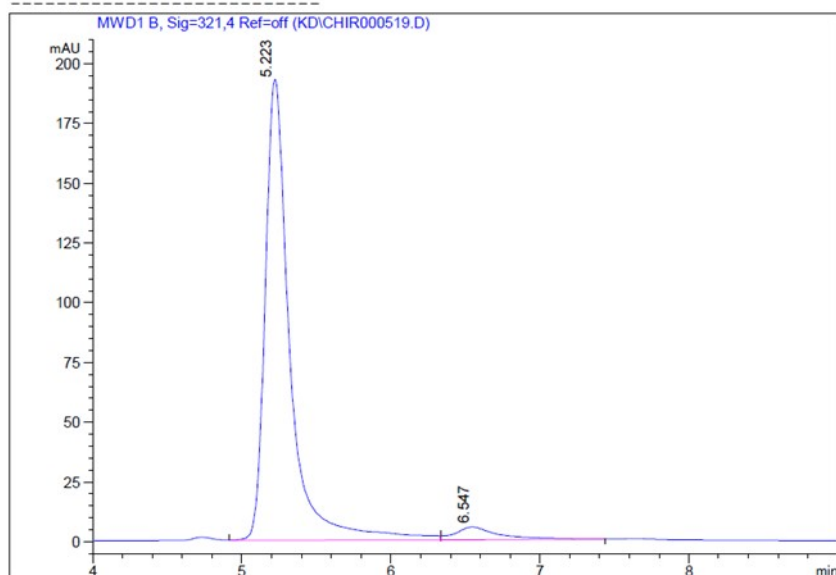

| # | Meas. R | Area    | Area % |
|---|---------|---------|--------|
| 1 | 5.223   | 2.222e3 | 95.464 |
| 2 | 6.547   | 105.553 | 4.536  |

Figure S99. HPLC chromatograms of 3aag

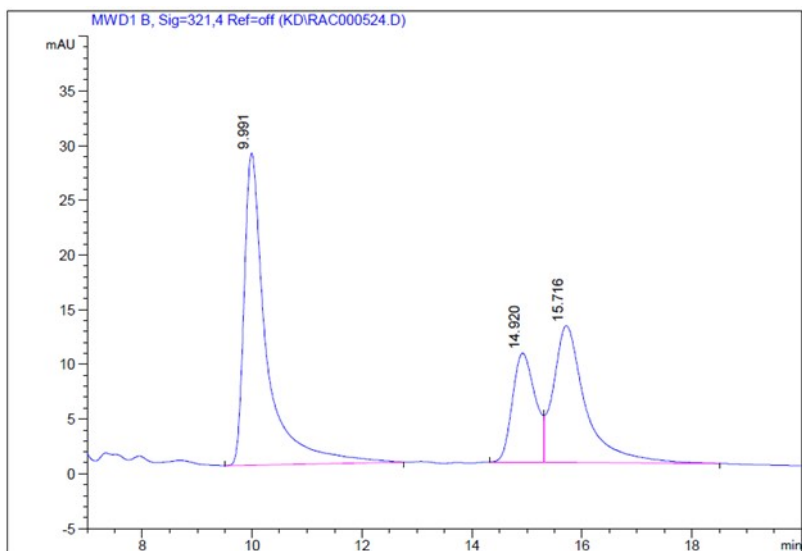

| # | Meas. R | Area    | Area % |
|---|---------|---------|--------|
| 1 | 9.991   | 804.179 | 50.076 |
| 2 | 14.920  | 289.344 | 18.017 |
| 3 | 15.716  | 512.402 | 31.907 |

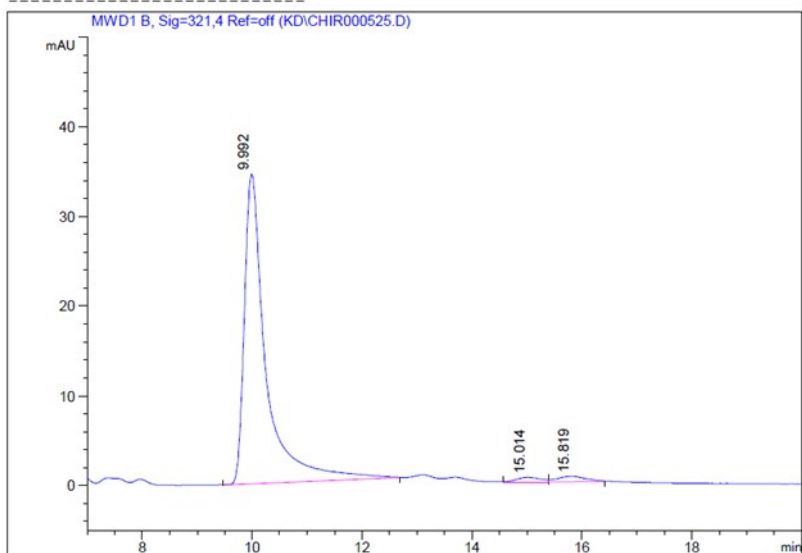

| # | Meas. R | Area    | Area % |
|---|---------|---------|--------|
| 1 | 9.992   | 944.618 | 96.236 |
| 2 | 15.014  | 15.001  | 1.528  |
| 3 | 15.819  | 21.945  | 2.236  |

Figure S100. HPLC chromatograms of **3aah**

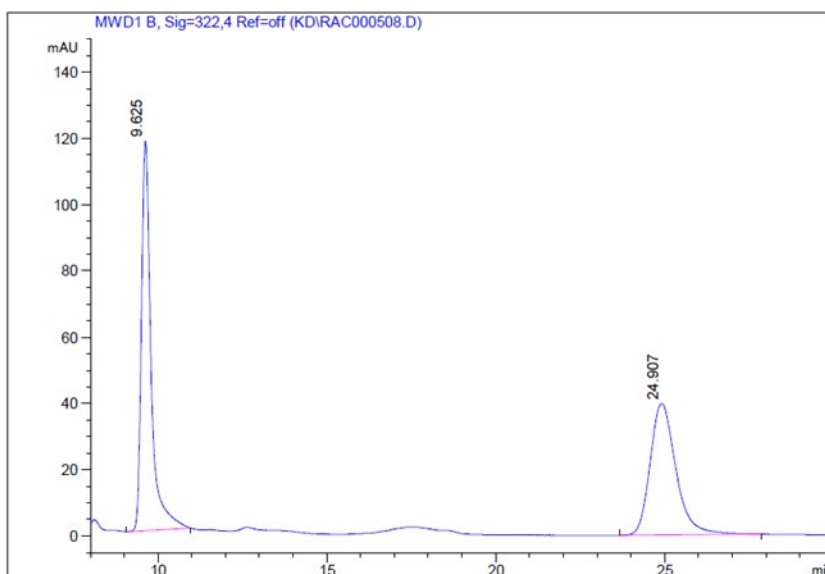

| # | Meas. R | Area    | Area % |
|---|---------|---------|--------|
| 1 | 9.625   | 2.338e3 | 52.593 |
| 2 | 24.907  | 2.107e3 | 47.407 |

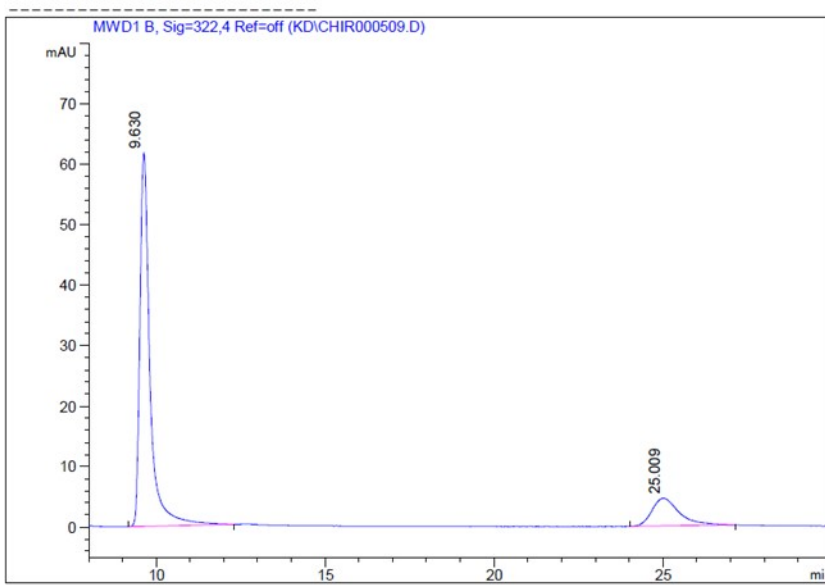

| # | Meas. R | Area    | Area % |
|---|---------|---------|--------|
| 1 | 9.630   | 1.279e3 | 82.994 |
| 2 | 25.009  | 262.027 | 17.006 |

Figure S101. HPLC chromatograms of **3aai**

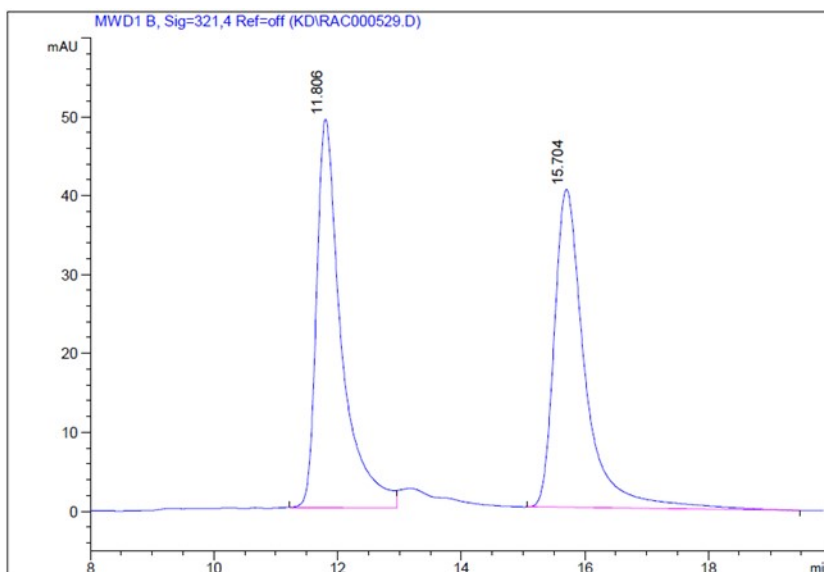

| # | Meas. R | Area    | Area % |
|---|---------|---------|--------|
| 1 | 11.806  | 1.381e3 | 49.717 |
| 2 | 15.704  | 1.396e3 | 50.283 |

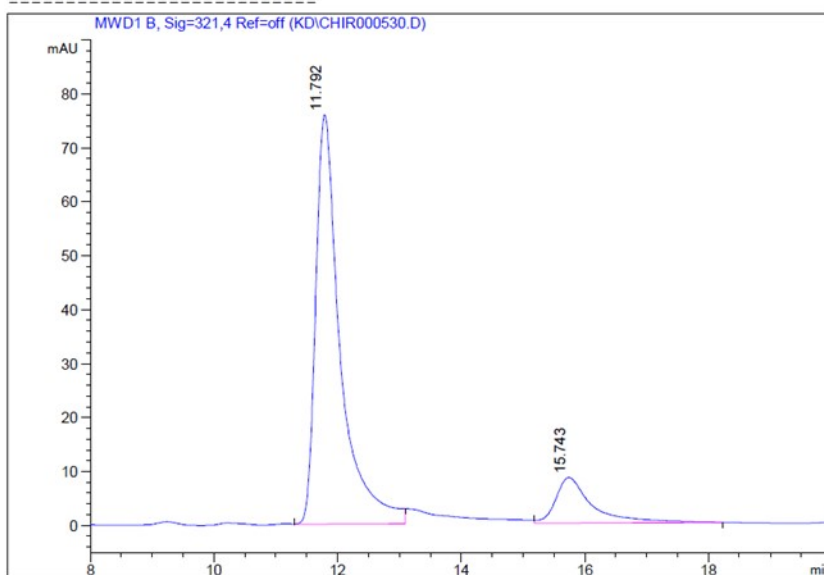

| # | Meas. R | Area    | Area % |
|---|---------|---------|--------|
| 1 | 11.792  | 2.097e3 | 85.835 |
| 2 | 15.743  | 345.990 | 14.165 |

Figure S102. HPLC chromatograms of **3aaj**

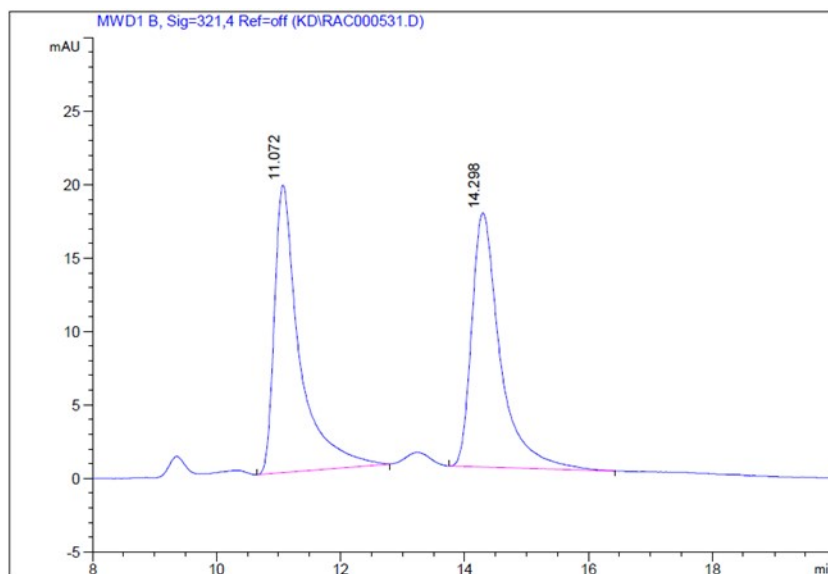

| # | Meas. R | Area    | Area % |
|---|---------|---------|--------|
| 1 | 11.072  | 552.841 | 50.043 |
| 2 | 14.298  | 551.898 | 49.957 |

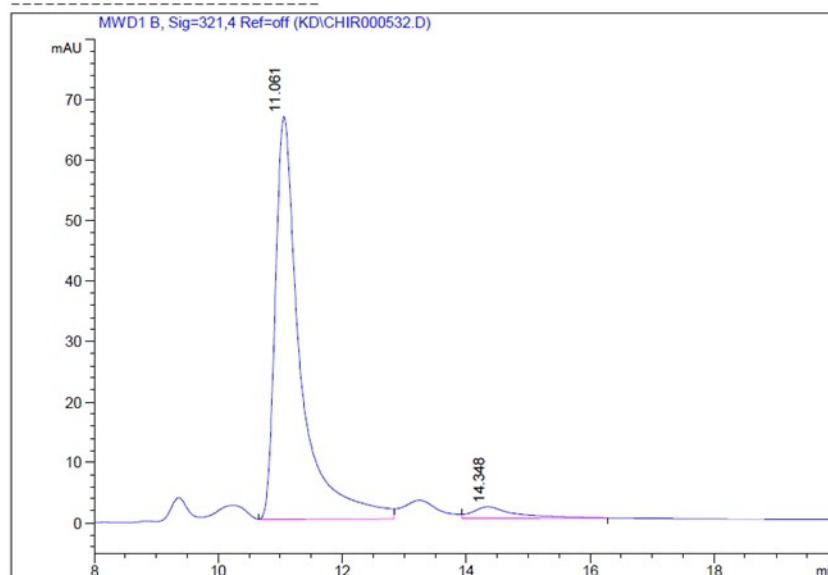

| # | Meas. R | Area    | Area % |
|---|---------|---------|--------|
| 1 | 11.061  | 1.870e3 | 95.358 |
| 2 | 14.348  | 91.012  | 4.642  |

Figure S103. HPLC chromatograms of **3aak**

## 6. Literature

- (1) Hardman-Baldwin, A. M.; Visco, M. D.; Wieting, J. M.; Stern, C.; Kondo, S. I.; Mattson, A. E. *Org. Lett.* **2016**, *18*, 3766–3769.
- (2) Balakrishna, C.; Kandula, V.; Gudipati, R.; Yennam, S.; Devi, P. U.; Behera, M. *Synlett* **2018**, *29*, 1087–1091.
- (3) Damodar, K.; Lee, J. T.; Kim, J. K.; Jun, J. G. *Bioorganic Med. Chem. Lett.* **2018**, *28*, 2098–2102.
- (4) Stubbing, L. A.; Li, F. F.; Furkert, D. P.; Caprio, V. E.; Brimble, M. A. *Tetrahedron* **2012**, *68*, 6948–6956.
- (5) Wang, X.; Liu, B.; Searle, X.; Yeung, C.; Bogdan, A.; Greszler, S.; Singh, A.; Fan, Y.; Swensen, A. M.; Vortherms, T.; Balut, C.; Jia, Y.; Desino, K.; Gao, W.; Yong, H.; Tse, C.; Kym, P. *J. Med. Chem.* **2018**, *61*, 1436–1449.
- (6) Zhou, Y.; Liang, H.; Sheng, Y.; Wang, S.; Gao, Y.; Zhan, L.; Zheng, Z.; Yang, M.; Liang, G.; Zhou, J.; Deng, J.; Song, Z. *J. Org. Chem.* **2020**, *85*, 9230–9243.
- (7) Rao, P.; Srimannarayana, G. *Synth. Commun.* **1987**, *17*, 1507–1512.
- (8) Ahmad-Junan, S. A.; Whiting, D. A. *J. Chem. Soc. Perkin Trans. 1* **1992**, No. 6, 675.
- (9) Hueber, D.; Tecj, M.; Brenner, E.; Matt, D.; Weibel, J. M.; Pale, P.; Blanc, A. *Adv. Synth. Catal.* **2018**, *360*, 2453–2459.
- (10) Xu, Y.; Wang, Q.; Wu, Y.; Zeng, Z.; Rudolph, M.; Hashmi, A. S. K. *Adv. Synth. Catal.* **2019**, *361*, 2309–2314.
- (11) Zhou, B.; Wu, Q.; Dong, Z.; Xu, J.; Yang, Z. *Org. Lett.* **2019**, *21*, 3594–3599.
- (12) Kim, S. M.; Lee, D.; Hong, S. H. *Org. Lett.* **2014**, *16*, 6168–6171.
- (13) Kwong, C. K. W.; Fu, M. Y.; Law, H. C. H.; Toy, P. H. *Synlett* **2010**, No. 17, 2617–2620.
- (14) CrysAlis RED and CrysAlis CCD. Oxford Diffraction Ltd., Abingdon, Oxfordshire, England, 2000.
- (15) Sheldrick, G. M. *Acta Crystallogr. Sect. C Struct. Chem.* **2015**, *71*, 3–8.
- (16) K. Brandenburg, DIAMOND, Release 2.1e. Crystal Impact GbR, Bonn, Germany, 2001.
- (17) Farrugia, L. J. *J. Appl. Crystallogr.* **2012**, *45*, 849–854.
